# Supplementary material for: RNA Sequencing of Intestinal Enterocytes Pre- and Post-Roux-en-Y Gastric Bypass Reveals Alteration in Gene Expression Related to Enterocyte Differentiation, Restitution, and Obesity with Regulation by Schlafen 12
Source: MDPI journal article supplement (doi:10.3390/cells11203283), 2022-10-18
Supplement: s1 [file s1]

|              | Fold change and relative BMI Correlation |                  |
|--------------|------------------------------------------|------------------|
| Genes        | Correlation Coefficient                  | Correlation_Pval |
| SSMEM1       | 9.45E-01                                 | 1.12E-05         |
| LOC107985272 | 9.09E-01                                 | 1.06E-04         |
| PRF1         | 9.09E-01                                 | 1.06E-04         |
| GTF2I        | 9.00E-01                                 | 1.60E-04         |
| LOC105376613 | 9.00E-01                                 | 1.60E-04         |
| LOC102723548 | 9.00E-01                                 | 1.60E-04         |
| WNK3         | 8.91E-01                                 | 2.33E-04         |
| P3H2.AS1     | 8.82E-01                                 | 3.30E-04         |
| LOC105378213 | 8.82E-01                                 | 3.30E-04         |
| LOC107984554 | 8.82E-01                                 | 3.30E-04         |
| ADGRG2       | 8.82E-01                                 | 3.30E-04         |
| LOC101929752 | 8.73E-01                                 | 4.55E-04         |
| ZDHHC19      | 8.73E-01                                 | 4.55E-04         |
| CREB3L2.AS1  | 8.73E-01                                 | 4.55E-04         |
| LOC105376088 | 8.73E-01                                 | 4.55E-04         |
| COL5A1.AS1   | 8.73E-01                                 | 4.55E-04         |
| DYRK4        | 8.73E-01                                 | 4.55E-04         |
| CMC4         | 8.73E-01                                 | 4.55E-04         |
| LOC105373484 | 8.64E-01                                 | 6.12E-04         |
| LOC105374759 | 8.64E-01                                 | 6.12E-04         |
| CRISP2       | 8.64E-01                                 | 6.12E-04         |
| LOC101928254 | 8.64E-01                                 | 6.12E-04         |
| LOC112268042 | 8.64E-01                                 | 6.12E-04         |
| IFITM1       | 8.64E-01                                 | 6.12E-04         |
| PCDHAC1      | 8.55E-01                                 | 8.07E-04         |
| USP17L4      | 8.55E-01                                 | 8.07E-04         |
| MKX.AS1      | 8.55E-01                                 | 8.07E-04         |
| LOC105369565 | 8.55E-01                                 | 8.07E-04         |
| TESPA1       | 8.55E-01                                 | 8.07E-04         |
| LOC105370092 | 8.55E-01                                 | 8.07E-04         |
| ACOT1        | 8.55E-01                                 | 8.07E-04         |
| LOC105372233 | 8.55E-01                                 | 8.07E-04         |
| DEFB127      | 8.55E-01                                 | 8.07E-04         |
| LINC01204    | 8.55E-01                                 | 8.07E-04         |
| ARHGEF2.AS1  | 8.45E-01                                 | 1.05E-03         |
| LOC105373924 | 8.45E-01                                 | 1.05E-03         |
| CCR5         | 8.45E-01                                 | 1.05E-03         |

|                 |          |          |
|-----------------|----------|----------|
| C3orf85         | 8.45E-01 | 1.05E-03 |
| LOC105374645    | 8.45E-01 | 1.05E-03 |
| LOC105378211    | 8.45E-01 | 1.05E-03 |
| TRY.GTA1.1      | 8.45E-01 | 1.05E-03 |
| LOC105379370    | 8.45E-01 | 1.05E-03 |
| RC3H2           | 8.45E-01 | 1.05E-03 |
| CAND1.11        | 8.45E-01 | 1.05E-03 |
| KAT5            | 8.45E-01 | 1.05E-03 |
| KLRC4           | 8.45E-01 | 1.05E-03 |
| BMS1P18         | 8.45E-01 | 1.05E-03 |
| FANCA           | 8.45E-01 | 1.05E-03 |
| LOC101929552    | 8.45E-01 | 1.05E-03 |
| MIR3156.3       | 8.45E-01 | 1.05E-03 |
| LOC105372977    | 8.45E-01 | 1.05E-03 |
| PKD1P6.NPIPP1_1 | 8.45E-01 | 1.05E-03 |
| CYP4B1          | 8.36E-01 | 1.33E-03 |
| LOC105373394    | 8.36E-01 | 1.33E-03 |
| SLC2A9.AS1      | 8.36E-01 | 1.33E-03 |
| PCDHGA1         | 8.36E-01 | 1.33E-03 |
| USP17L1         | 8.36E-01 | 1.33E-03 |
| LOC105370088    | 8.36E-01 | 1.33E-03 |
| LOC101927864    | 8.36E-01 | 1.33E-03 |
| VMP1            | 8.36E-01 | 1.33E-03 |
| TNRC6C          | 8.36E-01 | 1.33E-03 |
| ZNF567          | 8.36E-01 | 1.33E-03 |
| LOC105372497    | 8.36E-01 | 1.33E-03 |
| TOP1            | 8.36E-01 | 1.33E-03 |
| PABPC1L2A       | 8.36E-01 | 1.33E-03 |
| GJC2            | 8.27E-01 | 1.68E-03 |
| UHRF1BP1        | 8.27E-01 | 1.68E-03 |
| TAX1BP1.AS1     | 8.27E-01 | 1.68E-03 |
| LOC105375599    | 8.27E-01 | 1.68E-03 |
| LOC100287846    | 8.27E-01 | 1.68E-03 |
| C8orf33         | 8.27E-01 | 1.68E-03 |
| CARS1.AS1       | 8.27E-01 | 1.68E-03 |
| OR2AG2          | 8.27E-01 | 1.68E-03 |
| LINC00958       | 8.27E-01 | 1.68E-03 |
| CCDC179         | 8.27E-01 | 1.68E-03 |
| SNORD6          | 8.27E-01 | 1.68E-03 |
| LOC101927437    | 8.27E-01 | 1.68E-03 |
| SKAP1           | 8.27E-01 | 1.68E-03 |

|              |          |          |
|--------------|----------|----------|
| LOC105372069 | 8.27E-01 | 1.68E-03 |
| UHRF1        | 8.27E-01 | 1.68E-03 |
| IFNL1        | 8.27E-01 | 1.68E-03 |
| FRG1DP       | 8.27E-01 | 1.68E-03 |
| LOC105373083 | 8.27E-01 | 1.68E-03 |
| LOC105373223 | 8.18E-01 | 2.08E-03 |
| LOC105373616 | 8.18E-01 | 2.08E-03 |
| CRYGB        | 8.18E-01 | 2.08E-03 |
| TTLL4        | 8.18E-01 | 2.08E-03 |
| LOC107986019 | 8.18E-01 | 2.08E-03 |
| ASTE1        | 8.18E-01 | 2.08E-03 |
| NPHP3.ACAD11 | 8.18E-01 | 2.08E-03 |
| TMEM131L     | 8.18E-01 | 2.08E-03 |
| LOC105377529 | 8.18E-01 | 2.08E-03 |
| LOC107986643 | 8.18E-01 | 2.08E-03 |
| LOC105378036 | 8.18E-01 | 2.08E-03 |
| LOC100506664 | 8.18E-01 | 2.08E-03 |
| MCM4         | 8.18E-01 | 2.08E-03 |
| LOC107986961 | 8.18E-01 | 2.08E-03 |
| LOC105375952 | 8.18E-01 | 2.08E-03 |
| OR5AK4P      | 8.18E-01 | 2.08E-03 |
| PGR          | 8.18E-01 | 2.08E-03 |
| LOC105370284 | 8.18E-01 | 2.08E-03 |
| PARP16       | 8.18E-01 | 2.08E-03 |
| LOC107983949 | 8.18E-01 | 2.08E-03 |
| LINC01970    | 8.18E-01 | 2.08E-03 |
| ZNF516.DT    | 8.18E-01 | 2.08E-03 |
| LINC01727    | 8.18E-01 | 2.08E-03 |
| LOC107985570 | 8.18E-01 | 2.08E-03 |
| DCAF8L1      | 8.18E-01 | 2.08E-03 |
| LOC102724491 | 8.18E-01 | 2.08E-03 |
| MACO1        | 8.09E-01 | 2.56E-03 |
| LOC107985238 | 8.09E-01 | 2.56E-03 |
| LOC107985460 | 8.09E-01 | 2.56E-03 |
| LOC107985877 | 8.09E-01 | 2.56E-03 |
| MIR216A      | 8.09E-01 | 2.56E-03 |
| LOC105377033 | 8.09E-01 | 2.56E-03 |
| GUCA1C       | 8.09E-01 | 2.56E-03 |
| PYDC2        | 8.09E-01 | 2.56E-03 |
| MIR548I2     | 8.09E-01 | 2.56E-03 |
| LOC285593    | 8.09E-01 | 2.56E-03 |

|              |          |          |
|--------------|----------|----------|
| GMCL2        | 8.09E-01 | 2.56E-03 |
| TUBE1        | 8.09E-01 | 2.56E-03 |
| HOXA11       | 8.09E-01 | 2.56E-03 |
| CLDN12       | 8.09E-01 | 2.56E-03 |
| PMS2P1       | 8.09E-01 | 2.56E-03 |
| TRS.AGA2.5   | 8.09E-01 | 2.56E-03 |
| LOC112268054 | 8.09E-01 | 2.56E-03 |
| LOC107987142 | 8.09E-01 | 2.56E-03 |
| FAM166A      | 8.09E-01 | 2.56E-03 |
| C11orf1      | 8.09E-01 | 2.56E-03 |
| LOC105369947 | 8.09E-01 | 2.56E-03 |
| SNORD109B    | 8.09E-01 | 2.56E-03 |
| MRPL46       | 8.09E-01 | 2.56E-03 |
| LOC105370997 | 8.09E-01 | 2.56E-03 |
| SNAI3.AS1    | 8.09E-01 | 2.56E-03 |
| LINC01428    | 8.09E-01 | 2.56E-03 |
| LOC105372782 | 8.09E-01 | 2.56E-03 |
| IGLV1.62     | 8.09E-01 | 2.56E-03 |
| C22orf15     | 8.09E-01 | 2.56E-03 |
| LOC105373293 | 8.09E-01 | 2.56E-03 |
| TCEAL5       | 8.09E-01 | 2.56E-03 |
| LOC101928832 | 8.09E-01 | 2.56E-03 |
| SALL3_1      | 8.09E-01 | 2.56E-03 |
| LOC105374866 | 8.09E-01 | 2.56E-03 |
| MIR2682      | 8.00E-01 | 3.11E-03 |
| LOC107985795 | 8.00E-01 | 3.11E-03 |
| ORC2         | 8.00E-01 | 3.11E-03 |
| EIF2A        | 8.00E-01 | 3.11E-03 |
| MIR551B      | 8.00E-01 | 3.11E-03 |
| LOC105374296 | 8.00E-01 | 3.11E-03 |
| STPG2.AS1    | 8.00E-01 | 3.11E-03 |
| LINC01061    | 8.00E-01 | 3.11E-03 |
| ZNF330       | 8.00E-01 | 3.11E-03 |
| LOC105377516 | 8.00E-01 | 3.11E-03 |
| LOC105374955 | 8.00E-01 | 3.11E-03 |
| LOC105377998 | 8.00E-01 | 3.11E-03 |
| LOC115308161 | 8.00E-01 | 3.11E-03 |
| DEFB109B     | 8.00E-01 | 3.11E-03 |
| STK3         | 8.00E-01 | 3.11E-03 |
| LOC107986968 | 8.00E-01 | 3.11E-03 |
| LOC112268045 | 8.00E-01 | 3.11E-03 |

|              |          |          |
|--------------|----------|----------|
| MIR181B2     | 8.00E-01 | 3.11E-03 |
| LOC101448202 | 8.00E-01 | 3.11E-03 |
| MIR3611      | 8.00E-01 | 3.11E-03 |
| LINC00866    | 8.00E-01 | 3.11E-03 |
| LINC02747    | 8.00E-01 | 3.11E-03 |
| MIRLET7A2    | 8.00E-01 | 3.11E-03 |
| LINC02156    | 8.00E-01 | 3.11E-03 |
| MIR1197      | 8.00E-01 | 3.11E-03 |
| LOC105376730 | 8.00E-01 | 3.11E-03 |
| LOC105371381 | 8.00E-01 | 3.11E-03 |
| LINC01926    | 8.00E-01 | 3.11E-03 |
| LINC01534    | 8.00E-01 | 3.11E-03 |
| LSM14B       | 8.00E-01 | 3.11E-03 |
| PIK3IP1      | 8.00E-01 | 3.11E-03 |
| OCRL         | 8.00E-01 | 3.11E-03 |
| HTATSF1      | 8.00E-01 | 3.11E-03 |
| SLC25A24_1   | 8.00E-01 | 3.11E-03 |
| LOC112268402 | 8.00E-01 | 3.11E-03 |
| PRR23D1_1    | 8.00E-01 | 3.11E-03 |
| ROR1.AS1     | 7.91E-01 | 3.75E-03 |
| LOC101929788 | 7.91E-01 | 3.75E-03 |
| LOC107985996 | 7.91E-01 | 3.75E-03 |
| SLC9A9.AS1   | 7.91E-01 | 3.75E-03 |
| TMPRSS11GP   | 7.91E-01 | 3.75E-03 |
| JCHAIN       | 7.91E-01 | 3.75E-03 |
| LINC02057    | 7.91E-01 | 3.75E-03 |
| TTC37        | 7.91E-01 | 3.75E-03 |
| CSNK1A1      | 7.91E-01 | 3.75E-03 |
| FAXDC2       | 7.91E-01 | 3.75E-03 |
| LOC107986632 | 7.91E-01 | 3.75E-03 |
| STX7         | 7.91E-01 | 3.75E-03 |
| SLC22A3      | 7.91E-01 | 3.75E-03 |
| LOC105378094 | 7.91E-01 | 3.75E-03 |
| LINC01176    | 7.91E-01 | 3.75E-03 |
| LOC105375238 | 7.91E-01 | 3.75E-03 |
| LOC105375326 | 7.91E-01 | 3.75E-03 |
| STC1         | 7.91E-01 | 3.75E-03 |
| ARHGAP12     | 7.91E-01 | 3.75E-03 |
| LINC02683    | 7.91E-01 | 3.75E-03 |
| SHANK2       | 7.91E-01 | 3.75E-03 |
| LOC105369552 | 7.91E-01 | 3.75E-03 |

|              |          |          |
|--------------|----------|----------|
| LINC00400    | 7.91E-01 | 3.75E-03 |
| LOC107984566 | 7.91E-01 | 3.75E-03 |
| LOC101928462 | 7.91E-01 | 3.75E-03 |
| LOC107984691 | 7.91E-01 | 3.75E-03 |
| SNORD116.3   | 7.91E-01 | 3.75E-03 |
| LOC107984727 | 7.91E-01 | 3.75E-03 |
| OR2C1        | 7.91E-01 | 3.75E-03 |
| SYT17        | 7.91E-01 | 3.75E-03 |
| BBS2         | 7.91E-01 | 3.75E-03 |
| LOC105376778 | 7.91E-01 | 3.75E-03 |
| LOC105372081 | 7.91E-01 | 3.75E-03 |
| MIR522       | 7.91E-01 | 3.75E-03 |
| ZGPAT        | 7.91E-01 | 3.75E-03 |
| LOC107985494 | 7.91E-01 | 3.75E-03 |
| LOC105372836 | 7.91E-01 | 3.75E-03 |
| LOC107985376 | 7.82E-01 | 4.47E-03 |
| MTMR9LP      | 7.82E-01 | 4.47E-03 |
| LINC02884    | 7.82E-01 | 4.47E-03 |
| RPL21P28     | 7.82E-01 | 4.47E-03 |
| LOC107985771 | 7.82E-01 | 4.47E-03 |
| LOC105373575 | 7.82E-01 | 4.47E-03 |
| TFCP2L1      | 7.82E-01 | 4.47E-03 |
| LOC107986067 | 7.82E-01 | 4.47E-03 |
| LINC00882    | 7.82E-01 | 4.47E-03 |
| LOC105374307 | 7.82E-01 | 4.47E-03 |
| DLG1.AS1     | 7.82E-01 | 4.47E-03 |
| USP17L6P     | 7.82E-01 | 4.47E-03 |
| ARHGAP24     | 7.82E-01 | 4.47E-03 |
| LOC107986309 | 7.82E-01 | 4.47E-03 |
| LINC01340    | 7.82E-01 | 4.47E-03 |
| PCDHB4       | 7.82E-01 | 4.47E-03 |
| LOC107986483 | 7.82E-01 | 4.47E-03 |
| LOC107986601 | 7.82E-01 | 4.47E-03 |
| SNORD166     | 7.82E-01 | 4.47E-03 |
| LOC105375363 | 7.82E-01 | 4.47E-03 |
| KMT2E        | 7.82E-01 | 4.47E-03 |
| LOC105379771 | 7.82E-01 | 4.47E-03 |
| LOC107986905 | 7.82E-01 | 4.47E-03 |
| BAAT         | 7.82E-01 | 4.47E-03 |
| GLUD1P2      | 7.82E-01 | 4.47E-03 |
| OR52K2       | 7.82E-01 | 4.47E-03 |

|                 |          |          |
|-----------------|----------|----------|
| STK33           | 7.82E-01 | 4.47E-03 |
| OR1S1           | 7.82E-01 | 4.47E-03 |
| LOC107984334    | 7.82E-01 | 4.47E-03 |
| LOC105378956    | 7.82E-01 | 4.47E-03 |
| LINC01500       | 7.82E-01 | 4.47E-03 |
| LOC100129540    | 7.82E-01 | 4.47E-03 |
| LOC105371060    | 7.82E-01 | 4.47E-03 |
| LOC105379460    | 7.82E-01 | 4.47E-03 |
| VKORC1          | 7.82E-01 | 4.47E-03 |
| MT1B            | 7.82E-01 | 4.47E-03 |
| LOC105371413    | 7.82E-01 | 4.47E-03 |
| TCF4            | 7.82E-01 | 4.47E-03 |
| LINC01529       | 7.82E-01 | 4.47E-03 |
| LL21NC02.21A1.1 | 7.82E-01 | 4.47E-03 |
| MRTFA           | 7.82E-01 | 4.47E-03 |
| TSIX            | 7.82E-01 | 4.47E-03 |
| PABPC5.AS1      | 7.82E-01 | 4.47E-03 |
| PSMD10          | 7.82E-01 | 4.47E-03 |
| SOX3            | 7.82E-01 | 4.47E-03 |
| MAGEA12         | 7.82E-01 | 4.47E-03 |
| LOC105371625    | 7.73E-01 | 5.30E-03 |
| LOC105373504    | 7.73E-01 | 5.30E-03 |
| LOC105377099    | 7.73E-01 | 5.30E-03 |
| NR1I2           | 7.73E-01 | 5.30E-03 |
| LINC02496       | 7.73E-01 | 5.30E-03 |
| LOC101928819    | 7.73E-01 | 5.30E-03 |
| MSX2            | 7.73E-01 | 5.30E-03 |
| LOC105377882    | 7.73E-01 | 5.30E-03 |
| TRQ.TTG4.1      | 7.73E-01 | 5.30E-03 |
| LOC105375155    | 7.73E-01 | 5.30E-03 |
| DDX56           | 7.73E-01 | 5.30E-03 |
| MIR5480         | 7.73E-01 | 5.30E-03 |
| LOC102724407    | 7.73E-01 | 5.30E-03 |
| TMEM139.AS1     | 7.73E-01 | 5.30E-03 |
| LOC105376369    | 7.73E-01 | 5.30E-03 |
| ANK3.DT         | 7.73E-01 | 5.30E-03 |
| NUDT9P1         | 7.73E-01 | 5.30E-03 |
| TIAL1           | 7.73E-01 | 5.30E-03 |
| LOC105376642    | 7.73E-01 | 5.30E-03 |
| ARHGAP42        | 7.73E-01 | 5.30E-03 |
| DAZAP2          | 7.73E-01 | 5.30E-03 |

|              |          |          |
|--------------|----------|----------|
| LOC105369811 | 7.73E-01 | 5.30E-03 |
| TRAV22       | 7.73E-01 | 5.30E-03 |
| PRORP        | 7.73E-01 | 5.30E-03 |
| ACOT2        | 7.73E-01 | 5.30E-03 |
| NDUFB1       | 7.73E-01 | 5.30E-03 |
| CTF1         | 7.73E-01 | 5.30E-03 |
| LOC107985063 | 7.73E-01 | 5.30E-03 |
| LOC105371934 | 7.73E-01 | 5.30E-03 |
| CCDC103      | 7.73E-01 | 5.30E-03 |
| VEZF1        | 7.73E-01 | 5.30E-03 |
| MTMR4        | 7.73E-01 | 5.30E-03 |
| MIR3975      | 7.73E-01 | 5.30E-03 |
| LOC105372074 | 7.73E-01 | 5.30E-03 |
| LOC107985434 | 7.73E-01 | 5.30E-03 |
| TCF20        | 7.73E-01 | 5.30E-03 |
| KLHL34       | 7.73E-01 | 5.30E-03 |
| MAGEB4       | 7.73E-01 | 5.30E-03 |
| TAS2R19_2    | 7.73E-01 | 5.30E-03 |
| FUCA1        | 7.64E-01 | 6.23E-03 |
| MPL          | 7.64E-01 | 6.23E-03 |
| LOC647070    | 7.64E-01 | 6.23E-03 |
| LINC01740    | 7.64E-01 | 6.23E-03 |
| LOC107985372 | 7.64E-01 | 6.23E-03 |
| UGT1A6       | 7.64E-01 | 6.23E-03 |
| QDPR         | 7.64E-01 | 6.23E-03 |
| STIM2        | 7.64E-01 | 6.23E-03 |
| LOC101930370 | 7.64E-01 | 6.23E-03 |
| LINC01554    | 7.64E-01 | 6.23E-03 |
| SLC36A2      | 7.64E-01 | 6.23E-03 |
| TNFRSF10C    | 7.64E-01 | 6.23E-03 |
| TCEA1        | 7.64E-01 | 6.23E-03 |
| CYP7B1       | 7.64E-01 | 6.23E-03 |
| C9orf64      | 7.64E-01 | 6.23E-03 |
| SLC16A12.AS1 | 7.64E-01 | 6.23E-03 |
| SPX          | 7.64E-01 | 6.23E-03 |
| LINC02305    | 7.64E-01 | 6.23E-03 |
| LINC00637    | 7.64E-01 | 6.23E-03 |
| LOC105371301 | 7.64E-01 | 6.23E-03 |
| CRYBA1       | 7.64E-01 | 6.23E-03 |
| STXBP4       | 7.64E-01 | 6.23E-03 |
| LOC112267896 | 7.64E-01 | 6.23E-03 |



|              |          |          |
|--------------|----------|----------|
| DNAJB1       | 7.64E-01 | 6.23E-03 |
| VN1R4        | 7.64E-01 | 6.23E-03 |
| RBM39        | 7.64E-01 | 6.23E-03 |
| CYP4F29P     | 7.64E-01 | 6.23E-03 |
| KRTAP25.1    | 7.64E-01 | 6.23E-03 |
| SIK1         | 7.64E-01 | 6.23E-03 |
| LINC01637    | 7.64E-01 | 6.23E-03 |
| LINC01282    | 7.64E-01 | 6.23E-03 |
| SMARCA1      | 7.64E-01 | 6.23E-03 |
| UQCRHL       | 7.55E-01 | 7.28E-03 |
| LOC105376892 | 7.55E-01 | 7.28E-03 |
| RGS2.AS1     | 7.55E-01 | 7.28E-03 |
| LRRN2        | 7.55E-01 | 7.28E-03 |
| AURKAP1      | 7.55E-01 | 7.28E-03 |
| QPCT         | 7.55E-01 | 7.28E-03 |
| CCT7         | 7.55E-01 | 7.28E-03 |
| ACAA1        | 7.55E-01 | 7.28E-03 |
| LINC01997    | 7.55E-01 | 7.28E-03 |
| ELOVL7       | 7.55E-01 | 7.28E-03 |
| GUSBP3       | 7.55E-01 | 7.28E-03 |
| LINC01338    | 7.55E-01 | 7.28E-03 |
| GLP1R        | 7.55E-01 | 7.28E-03 |
| LOC107986633 | 7.55E-01 | 7.28E-03 |
| LOC105375202 | 7.55E-01 | 7.28E-03 |
| LOC112267986 | 7.55E-01 | 7.28E-03 |
| LOC107986921 | 7.55E-01 | 7.28E-03 |
| KCNU1        | 7.55E-01 | 7.28E-03 |
| SAMD12.AS1   | 7.55E-01 | 7.28E-03 |
| HACD4        | 7.55E-01 | 7.28E-03 |
| OR1J1        | 7.55E-01 | 7.28E-03 |
| LOC105376325 | 7.55E-01 | 7.28E-03 |
| ACTA2.AS1    | 7.55E-01 | 7.28E-03 |
| IDE          | 7.55E-01 | 7.28E-03 |
| LOC107984258 | 7.55E-01 | 7.28E-03 |
| NSMCE4A      | 7.55E-01 | 7.28E-03 |
| SPRNP1       | 7.55E-01 | 7.28E-03 |
| OTUB1        | 7.55E-01 | 7.28E-03 |
| MAP6         | 7.55E-01 | 7.28E-03 |
| LINC02711    | 7.55E-01 | 7.28E-03 |
| LOC645485    | 7.55E-01 | 7.28E-03 |
| LINC00333    | 7.55E-01 | 7.28E-03 |

|                |          |          |
|----------------|----------|----------|
| LINC00397      | 7.55E-01 | 7.28E-03 |
| LOC107984655   | 7.55E-01 | 7.28E-03 |
| LOC105371069   | 7.55E-01 | 7.28E-03 |
| LOC107984831   | 7.55E-01 | 7.28E-03 |
| OR2Z1          | 7.55E-01 | 7.28E-03 |
| ADIG           | 7.55E-01 | 7.28E-03 |
| KRTAP20.4      | 7.55E-01 | 7.28E-03 |
| SSR4P1         | 7.55E-01 | 7.28E-03 |
| LOC105372985   | 7.55E-01 | 7.28E-03 |
| SCUBE1.AS2     | 7.55E-01 | 7.28E-03 |
| PIGA           | 7.55E-01 | 7.28E-03 |
| OPHN1          | 7.55E-01 | 7.28E-03 |
| UPRT           | 7.55E-01 | 7.28E-03 |
| RAB39B         | 7.55E-01 | 7.28E-03 |
| LOC102723722_3 | 7.55E-01 | 7.28E-03 |
| LINC02810      | 7.45E-01 | 8.45E-03 |
| NSUN4          | 7.45E-01 | 8.45E-03 |
| LOC101929935   | 7.45E-01 | 8.45E-03 |
| PIN1P1         | 7.45E-01 | 8.45E-03 |
| LINC02795      | 7.45E-01 | 8.45E-03 |
| PKN2.AS1       | 7.45E-01 | 8.45E-03 |
| LINC02806      | 7.45E-01 | 8.45E-03 |
| ERO1B          | 7.45E-01 | 8.45E-03 |
| LOC105374761   | 7.45E-01 | 8.45E-03 |
| LOC101926959   | 7.45E-01 | 8.45E-03 |
| GRM7.AS2       | 7.45E-01 | 8.45E-03 |
| LOC107986187   | 7.45E-01 | 8.45E-03 |
| CHRNA9         | 7.45E-01 | 8.45E-03 |
| PARM1          | 7.45E-01 | 8.45E-03 |
| LOC100506858   | 7.45E-01 | 8.45E-03 |
| MIR378E        | 7.45E-01 | 8.45E-03 |
| EFCAB9         | 7.45E-01 | 8.45E-03 |
| TRIM52.AS1     | 7.45E-01 | 8.45E-03 |
| LY86           | 7.45E-01 | 8.45E-03 |
| LOC101927588   | 7.45E-01 | 8.45E-03 |
| VIM.AS1        | 7.45E-01 | 8.45E-03 |
| BUB3           | 7.45E-01 | 8.45E-03 |
| PLAAT3         | 7.45E-01 | 8.45E-03 |
| ALG9           | 7.45E-01 | 8.45E-03 |
| OR10S1         | 7.45E-01 | 8.45E-03 |
| LOC100130075   | 7.45E-01 | 8.45E-03 |

|              |          |          |
|--------------|----------|----------|
| LINC02820    | 7.45E-01 | 8.45E-03 |
| LINC02258    | 7.45E-01 | 8.45E-03 |
| LOC101928300 | 7.45E-01 | 8.45E-03 |
| MPHOSPH8     | 7.45E-01 | 8.45E-03 |
| MIR548AS     | 7.45E-01 | 8.45E-03 |
| LOC107984652 | 7.45E-01 | 8.45E-03 |
| RAD51.AS1    | 7.45E-01 | 8.45E-03 |
| CA12         | 7.45E-01 | 8.45E-03 |
| MEX3B        | 7.45E-01 | 8.45E-03 |
| LOC105370955 | 7.45E-01 | 8.45E-03 |
| LOC105371089 | 7.45E-01 | 8.45E-03 |
| TMEM11       | 7.45E-01 | 8.45E-03 |
| LOC112268202 | 7.45E-01 | 8.45E-03 |
| LINC00673    | 7.45E-01 | 8.45E-03 |
| LOC105372185 | 7.45E-01 | 8.45E-03 |
| CD320        | 7.45E-01 | 8.45E-03 |
| JUNB         | 7.45E-01 | 8.45E-03 |
| ZNF675       | 7.45E-01 | 8.45E-03 |
| ZNF582.AS1   | 7.45E-01 | 8.45E-03 |
| LOC105372510 | 7.45E-01 | 8.45E-03 |
| JAG1         | 7.45E-01 | 8.45E-03 |
| FRG1CP       | 7.45E-01 | 8.45E-03 |
| ACTR5        | 7.45E-01 | 8.45E-03 |
| CTSZ         | 7.45E-01 | 8.45E-03 |
| TST          | 7.45E-01 | 8.45E-03 |
| ERAS         | 7.45E-01 | 8.45E-03 |
| OTUD6A       | 7.45E-01 | 8.45E-03 |
| VGLL1        | 7.45E-01 | 8.45E-03 |
| BGN          | 7.45E-01 | 8.45E-03 |
| LOC101927441 | 7.36E-01 | 9.76E-03 |
| OLFM3        | 7.36E-01 | 9.76E-03 |
| TAF13        | 7.36E-01 | 9.76E-03 |
| LOC107985454 | 7.36E-01 | 9.76E-03 |
| LOC102723543 | 7.36E-01 | 9.76E-03 |
| LOC107985357 | 7.36E-01 | 9.76E-03 |
| LINC00570    | 7.36E-01 | 9.76E-03 |
| LOC105373545 | 7.36E-01 | 9.76E-03 |
| LRRC58       | 7.36E-01 | 9.76E-03 |
| NUDT16L2P    | 7.36E-01 | 9.76E-03 |
| LINC01327    | 7.36E-01 | 9.76E-03 |
| PIGY.DT      | 7.36E-01 | 9.76E-03 |

|              |          |          |
|--------------|----------|----------|
| LOC105377382 | 7.36E-01 | 9.76E-03 |
| LINC01033    | 7.36E-01 | 9.76E-03 |
| NOP16        | 7.36E-01 | 9.76E-03 |
| TRK.TTT9.1   | 7.36E-01 | 9.76E-03 |
| ZNF292       | 7.36E-01 | 9.76E-03 |
| CALHM5       | 7.36E-01 | 9.76E-03 |
| LOC105377977 | 7.36E-01 | 9.76E-03 |
| ADAT2        | 7.36E-01 | 9.76E-03 |
| STMP1        | 7.36E-01 | 9.76E-03 |
| LOC101928095 | 7.36E-01 | 9.76E-03 |
| LOC105379303 | 7.36E-01 | 9.76E-03 |
| LOC107986886 | 7.36E-01 | 9.76E-03 |
| ZFAND1       | 7.36E-01 | 9.76E-03 |
| LOC105375733 | 7.36E-01 | 9.76E-03 |
| LINC01388    | 7.36E-01 | 9.76E-03 |
| LOC107984279 | 7.36E-01 | 9.76E-03 |
| LOC105378567 | 7.36E-01 | 9.76E-03 |
| OR4A47       | 7.36E-01 | 9.76E-03 |
| LOC105369309 | 7.36E-01 | 9.76E-03 |
| PRPF19       | 7.36E-01 | 9.76E-03 |
| LOC101927583 | 7.36E-01 | 9.76E-03 |
| LOC107984438 | 7.36E-01 | 9.76E-03 |
| TRAV31       | 7.36E-01 | 9.76E-03 |
| LOC105370706 | 7.36E-01 | 9.76E-03 |
| SNURF        | 7.36E-01 | 9.76E-03 |
| LINC02205    | 7.36E-01 | 9.76E-03 |
| LOC101927227 | 7.36E-01 | 9.76E-03 |
| LOC105371344 | 7.36E-01 | 9.76E-03 |
| RPL27        | 7.36E-01 | 9.76E-03 |
| LOC105371840 | 7.36E-01 | 9.76E-03 |
| ZNF726       | 7.36E-01 | 9.76E-03 |
| LOC105372694 | 7.36E-01 | 9.76E-03 |
| ADRM1        | 7.36E-01 | 9.76E-03 |
| LOC107987324 | 7.36E-01 | 9.76E-03 |
| LOC101929372 | 7.36E-01 | 9.76E-03 |
| FAM239A      | 7.36E-01 | 9.76E-03 |
| TCEANC       | 7.36E-01 | 9.76E-03 |
| FAM47A       | 7.36E-01 | 9.76E-03 |
| LOC105373178 | 7.36E-01 | 9.76E-03 |
| FLICR        | 7.36E-01 | 9.76E-03 |
| SPANXN5      | 7.36E-01 | 9.76E-03 |

|              |          |          |
|--------------|----------|----------|
| HPRT1        | 7.36E-01 | 9.76E-03 |
| LOC105373373 | 7.36E-01 | 9.76E-03 |
| REG4         | 7.27E-01 | 1.12E-02 |
| LINC02591    | 7.27E-01 | 1.12E-02 |
| H2AC19       | 7.27E-01 | 1.12E-02 |
| KPRP         | 7.27E-01 | 1.12E-02 |
| FAM78B       | 7.27E-01 | 1.12E-02 |
| LOC105373117 | 7.27E-01 | 1.12E-02 |
| LOC105374842 | 7.27E-01 | 1.12E-02 |
| ECRG4        | 7.27E-01 | 1.12E-02 |
| LOC105373539 | 7.27E-01 | 1.12E-02 |
| LOC105373876 | 7.27E-01 | 1.12E-02 |
| LOC729968    | 7.27E-01 | 1.12E-02 |
| SRGAP3.AS3   | 7.27E-01 | 1.12E-02 |
| GOLGA4       | 7.27E-01 | 1.12E-02 |
| TWF2         | 7.27E-01 | 1.12E-02 |
| KBTBD12      | 7.27E-01 | 1.12E-02 |
| LOC105377275 | 7.27E-01 | 1.12E-02 |
| PCAT4        | 7.27E-01 | 1.12E-02 |
| MAD2L1       | 7.27E-01 | 1.12E-02 |
| LOC105377503 | 7.27E-01 | 1.12E-02 |
| LINC02162    | 7.27E-01 | 1.12E-02 |
| LOC101929200 | 7.27E-01 | 1.12E-02 |
| LINC01957    | 7.27E-01 | 1.12E-02 |
| PCDHGA4      | 7.27E-01 | 1.12E-02 |
| TRX.CAT1.2   | 7.27E-01 | 1.12E-02 |
| LOC107986543 | 7.27E-01 | 1.12E-02 |
| WASF1        | 7.27E-01 | 1.12E-02 |
| INHBA        | 7.27E-01 | 1.12E-02 |
| PCLO         | 7.27E-01 | 1.12E-02 |
| SRI          | 7.27E-01 | 1.12E-02 |
| LINC02847    | 7.27E-01 | 1.12E-02 |
| LOC105375723 | 7.27E-01 | 1.12E-02 |
| CCAT1        | 7.27E-01 | 1.12E-02 |
| LOC107987065 | 7.27E-01 | 1.12E-02 |
| FKBP15       | 7.27E-01 | 1.12E-02 |
| POU5F1P5     | 7.27E-01 | 1.12E-02 |
| LOC107984182 | 7.27E-01 | 1.12E-02 |
| EDRF1.AS1    | 7.27E-01 | 1.12E-02 |
| ELF5         | 7.27E-01 | 1.12E-02 |
| RBM4         | 7.27E-01 | 1.12E-02 |

|                |          |          |
|----------------|----------|----------|
| LOC107984536   | 7.27E-01 | 1.12E-02 |
| MIR1827        | 7.27E-01 | 1.12E-02 |
| ALDH1L2        | 7.27E-01 | 1.12E-02 |
| LOC107984440   | 7.27E-01 | 1.12E-02 |
| LOC105370050   | 7.27E-01 | 1.12E-02 |
| LOC254028      | 7.27E-01 | 1.12E-02 |
| LOC112268129   | 7.27E-01 | 1.12E-02 |
| LOC105370687   | 7.27E-01 | 1.12E-02 |
| PPP1R14D       | 7.27E-01 | 1.12E-02 |
| FEM1B          | 7.27E-01 | 1.12E-02 |
| EFL1           | 7.27E-01 | 1.12E-02 |
| SLC5A10        | 7.27E-01 | 1.12E-02 |
| LOC105371789   | 7.27E-01 | 1.12E-02 |
| HOXB5          | 7.27E-01 | 1.12E-02 |
| LINC01909      | 7.27E-01 | 1.12E-02 |
| EVI5L          | 7.27E-01 | 1.12E-02 |
| NCCRP1         | 7.27E-01 | 1.12E-02 |
| MIR644A        | 7.27E-01 | 1.12E-02 |
| TRAPPC2        | 7.27E-01 | 1.12E-02 |
| CLCN5          | 7.27E-01 | 1.12E-02 |
| LOC105373205   | 7.27E-01 | 1.12E-02 |
| SLC16A2        | 7.27E-01 | 1.12E-02 |
| MIR548AN       | 7.27E-01 | 1.12E-02 |
| LOC105371750_1 | 7.27E-01 | 1.12E-02 |
| AUNIP          | 7.18E-01 | 1.28E-02 |
| LOC107984962   | 7.18E-01 | 1.28E-02 |
| LINC02791      | 7.18E-01 | 1.28E-02 |
| H2BC21         | 7.18E-01 | 1.28E-02 |
| CENPF          | 7.18E-01 | 1.28E-02 |
| LOC107985359   | 7.18E-01 | 1.28E-02 |
| TOMM20         | 7.18E-01 | 1.28E-02 |
| LOC105373587   | 7.18E-01 | 1.28E-02 |
| LOC105373812   | 7.18E-01 | 1.28E-02 |
| SNRK.AS1       | 7.18E-01 | 1.28E-02 |
| LINC02042      | 7.18E-01 | 1.28E-02 |
| MIR9900        | 7.18E-01 | 1.28E-02 |
| IGF2BP2.AS1    | 7.18E-01 | 1.28E-02 |
| LOC105374359   | 7.18E-01 | 1.28E-02 |
| FBXL5          | 7.18E-01 | 1.28E-02 |
| PHOX2B.AS1     | 7.18E-01 | 1.28E-02 |
| LOC105377255   | 7.18E-01 | 1.28E-02 |

|              |          |          |
|--------------|----------|----------|
| F11.AS1      | 7.18E-01 | 1.28E-02 |
| BRIX1        | 7.18E-01 | 1.28E-02 |
| LOC105378965 | 7.18E-01 | 1.28E-02 |
| LOC105374929 | 7.18E-01 | 1.28E-02 |
| UBE2J1       | 7.18E-01 | 1.28E-02 |
| BACH2        | 7.18E-01 | 1.28E-02 |
| RBAK         | 7.18E-01 | 1.28E-02 |
| LOC105375253 | 7.18E-01 | 1.28E-02 |
| ARMC10       | 7.18E-01 | 1.28E-02 |
| DPY19L4      | 7.18E-01 | 1.28E-02 |
| LOC107986979 | 7.18E-01 | 1.28E-02 |
| MIR101.2     | 7.18E-01 | 1.28E-02 |
| LOC107987102 | 7.18E-01 | 1.28E-02 |
| XPA          | 7.18E-01 | 1.28E-02 |
| LOC107987117 | 7.18E-01 | 1.28E-02 |
| GRIN1        | 7.18E-01 | 1.28E-02 |
| LOC105376467 | 7.18E-01 | 1.28E-02 |
| OR51B2       | 7.18E-01 | 1.28E-02 |
| LOC105376655 | 7.18E-01 | 1.28E-02 |
| EEF1G        | 7.18E-01 | 1.28E-02 |
| RAB38        | 7.18E-01 | 1.28E-02 |
| LINC02719    | 7.18E-01 | 1.28E-02 |
| SLC35F2      | 7.18E-01 | 1.28E-02 |
| LOC101928030 | 7.18E-01 | 1.28E-02 |
| LOC105369668 | 7.18E-01 | 1.28E-02 |
| MGP          | 7.18E-01 | 1.28E-02 |
| APPL2        | 7.18E-01 | 1.28E-02 |
| LOC107984577 | 7.18E-01 | 1.28E-02 |
| LOC107984551 | 7.18E-01 | 1.28E-02 |
| CPB2.AS1     | 7.18E-01 | 1.28E-02 |
| TRAJ26       | 7.18E-01 | 1.28E-02 |
| LOC105370440 | 7.18E-01 | 1.28E-02 |
| TRMT5        | 7.18E-01 | 1.28E-02 |
| FBLN5        | 7.18E-01 | 1.28E-02 |
| TUNAR        | 7.18E-01 | 1.28E-02 |
| ZNF75A       | 7.18E-01 | 1.28E-02 |
| LOC101928708 | 7.18E-01 | 1.28E-02 |
| LOC105371520 | 7.18E-01 | 1.28E-02 |
| LINC02093    | 7.18E-01 | 1.28E-02 |
| LOC105371850 | 7.18E-01 | 1.28E-02 |
| PIAS2        | 7.18E-01 | 1.28E-02 |

|              |          |          |
|--------------|----------|----------|
| RPS15        | 7.18E-01 | 1.28E-02 |
| SNORA68B     | 7.18E-01 | 1.28E-02 |
| EMC10        | 7.18E-01 | 1.28E-02 |
| LOC105372699 | 7.18E-01 | 1.28E-02 |
| KRTAP19.2    | 7.18E-01 | 1.28E-02 |
| LOC101927635 | 7.18E-01 | 1.28E-02 |
| ZC3H12B      | 7.18E-01 | 1.28E-02 |
| TNMD         | 7.18E-01 | 1.28E-02 |
| KLHL13       | 7.18E-01 | 1.28E-02 |
| DUSP5P1_1    | 7.18E-01 | 1.28E-02 |
| LOC105371446 | 7.09E-01 | 1.46E-02 |
| FDPS         | 7.09E-01 | 1.46E-02 |
| KIRREL1      | 7.09E-01 | 1.46E-02 |
| C4BPB        | 7.09E-01 | 1.46E-02 |
| LINC02767    | 7.09E-01 | 1.46E-02 |
| CNIH3        | 7.09E-01 | 1.46E-02 |
| LOC107985466 | 7.09E-01 | 1.46E-02 |
| LOC105374589 | 7.09E-01 | 1.46E-02 |
| FAM138B      | 7.09E-01 | 1.46E-02 |
| LSM3         | 7.09E-01 | 1.46E-02 |
| LOC102724104 | 7.09E-01 | 1.46E-02 |
| SPINK8       | 7.09E-01 | 1.46E-02 |
| LSMEM2       | 7.09E-01 | 1.46E-02 |
| LOC105377114 | 7.09E-01 | 1.46E-02 |
| PRICKLE2.AS3 | 7.09E-01 | 1.46E-02 |
| LINC00635    | 7.09E-01 | 1.46E-02 |
| BCHE         | 7.09E-01 | 1.46E-02 |
| LINC02013    | 7.09E-01 | 1.46E-02 |
| LOC107986253 | 7.09E-01 | 1.46E-02 |
| LINC00504    | 7.09E-01 | 1.46E-02 |
| MIR573       | 7.09E-01 | 1.46E-02 |
| LOC102724210 | 7.09E-01 | 1.46E-02 |
| SNORA105A    | 7.09E-01 | 1.46E-02 |
| LOC105374715 | 7.09E-01 | 1.46E-02 |
| LOC105379052 | 7.09E-01 | 1.46E-02 |
| LOC101929710 | 7.09E-01 | 1.46E-02 |
| TAF7         | 7.09E-01 | 1.46E-02 |
| PCDHGB7      | 7.09E-01 | 1.46E-02 |
| LOC107983980 | 7.09E-01 | 1.46E-02 |
| LINC02159    | 7.09E-01 | 1.46E-02 |
| ZFP2         | 7.09E-01 | 1.46E-02 |



|              |          |          |
|--------------|----------|----------|
| LINC00847    | 7.09E-01 | 1.46E-02 |
| DOP1A        | 7.09E-01 | 1.46E-02 |
| LOC105378023 | 7.09E-01 | 1.46E-02 |
| LOC107986663 | 7.09E-01 | 1.46E-02 |
| CREB5        | 7.09E-01 | 1.46E-02 |
| LOC107986789 | 7.09E-01 | 1.46E-02 |
| LSMEM1       | 7.09E-01 | 1.46E-02 |
| LOC101928782 | 7.09E-01 | 1.46E-02 |
| LOC102723322 | 7.09E-01 | 1.46E-02 |
| ELAVL2       | 7.09E-01 | 1.46E-02 |
| PRKACG       | 7.09E-01 | 1.46E-02 |
| ZNF782       | 7.09E-01 | 1.46E-02 |
| KLF4         | 7.09E-01 | 1.46E-02 |
| LOC107987118 | 7.09E-01 | 1.46E-02 |
| LOC105378475 | 7.09E-01 | 1.46E-02 |
| OR5J2        | 7.09E-01 | 1.46E-02 |
| LOC101928940 | 7.09E-01 | 1.46E-02 |
| LOC101929432 | 7.09E-01 | 1.46E-02 |
| HOXC11       | 7.09E-01 | 1.46E-02 |
| EIF2B1       | 7.09E-01 | 1.46E-02 |
| LINC00462    | 7.09E-01 | 1.46E-02 |
| LOC105370481 | 7.09E-01 | 1.46E-02 |
| LOC105370842 | 7.09E-01 | 1.46E-02 |
| LOC106660606 | 7.09E-01 | 1.46E-02 |
| NPIP2        | 7.09E-01 | 1.46E-02 |
| OR1E3        | 7.09E-01 | 1.46E-02 |
| LINC02096    | 7.09E-01 | 1.46E-02 |
| CCL2         | 7.09E-01 | 1.46E-02 |
| PRKCA.AS1    | 7.09E-01 | 1.46E-02 |
| LOC112268199 | 7.09E-01 | 1.46E-02 |
| NPTX1        | 7.09E-01 | 1.46E-02 |
| LOC105379280 | 7.09E-01 | 1.46E-02 |
| LINC02837    | 7.09E-01 | 1.46E-02 |
| HSBP1L1      | 7.09E-01 | 1.46E-02 |
| LOC105372242 | 7.09E-01 | 1.46E-02 |
| LOC107987269 | 7.09E-01 | 1.46E-02 |
| KCNJ6.AS1    | 7.09E-01 | 1.46E-02 |
| RTN4R        | 7.09E-01 | 1.46E-02 |
| APOL1        | 7.09E-01 | 1.46E-02 |
| LOC101927393 | 7.09E-01 | 1.46E-02 |
| PGAM4        | 7.09E-01 | 1.46E-02 |

|              |          |          |
|--------------|----------|----------|
| LOC105373333 | 7.09E-01 | 1.46E-02 |
| CPTP         | 7.00E-01 | 1.65E-02 |
| TPRG1L       | 7.00E-01 | 1.65E-02 |
| LOC105376717 | 7.00E-01 | 1.65E-02 |
| MIR3659HG    | 7.00E-01 | 1.65E-02 |
| PPIEL        | 7.00E-01 | 1.65E-02 |
| LOC105378771 | 7.00E-01 | 1.65E-02 |
| DIRAS3       | 7.00E-01 | 1.65E-02 |
| LINC01709    | 7.00E-01 | 1.65E-02 |
| C1orf56      | 7.00E-01 | 1.65E-02 |
| FLG.AS1      | 7.00E-01 | 1.65E-02 |
| GPA33        | 7.00E-01 | 1.65E-02 |
| SLC19A2      | 7.00E-01 | 1.65E-02 |
| LOC105373159 | 7.00E-01 | 1.65E-02 |
| LOC105373275 | 7.00E-01 | 1.65E-02 |
| MYT1L.AS1    | 7.00E-01 | 1.65E-02 |
| SUPT7L       | 7.00E-01 | 1.65E-02 |
| FUNDC2P2     | 7.00E-01 | 1.65E-02 |
| ANKRD36BP2   | 7.00E-01 | 1.65E-02 |
| LOC105373501 | 7.00E-01 | 1.65E-02 |
| PSMD14       | 7.00E-01 | 1.65E-02 |
| GMPPB        | 7.00E-01 | 1.65E-02 |
| LINC02050    | 7.00E-01 | 1.65E-02 |
| LOC105374260 | 7.00E-01 | 1.65E-02 |
| YIPF7        | 7.00E-01 | 1.65E-02 |
| LOC105377661 | 7.00E-01 | 1.65E-02 |
| CSN3         | 7.00E-01 | 1.65E-02 |
| CABS1        | 7.00E-01 | 1.65E-02 |
| CXCL2        | 7.00E-01 | 1.65E-02 |
| SNORD144     | 7.00E-01 | 1.65E-02 |
| MCUB         | 7.00E-01 | 1.65E-02 |
| LOC105377462 | 7.00E-01 | 1.65E-02 |
| LOC105377568 | 7.00E-01 | 1.65E-02 |
| LOC105377607 | 7.00E-01 | 1.65E-02 |
| LOC105374659 | 7.00E-01 | 1.65E-02 |
| LOC107986423 | 7.00E-01 | 1.65E-02 |
| LOC107986438 | 7.00E-01 | 1.65E-02 |
| FAM53C       | 7.00E-01 | 1.65E-02 |
| PCDHGA9      | 7.00E-01 | 1.65E-02 |
| TRIM52       | 7.00E-01 | 1.65E-02 |
| H4C4         | 7.00E-01 | 1.65E-02 |

|              |          |          |
|--------------|----------|----------|
| MIR548B      | 7.00E-01 | 1.65E-02 |
| PKIB         | 7.00E-01 | 1.65E-02 |
| MAP3K5.AS1   | 7.00E-01 | 1.65E-02 |
| LOC102723758 | 7.00E-01 | 1.65E-02 |
| WIPI2        | 7.00E-01 | 1.65E-02 |
| PRPS1L1      | 7.00E-01 | 1.65E-02 |
| LAT2         | 7.00E-01 | 1.65E-02 |
| PRKAR2B.AS1  | 7.00E-01 | 1.65E-02 |
| IDO1         | 7.00E-01 | 1.65E-02 |
| RNF170       | 7.00E-01 | 1.65E-02 |
| PABPC1       | 7.00E-01 | 1.65E-02 |
| LOC105375759 | 7.00E-01 | 1.65E-02 |
| LOC105379447 | 7.00E-01 | 1.65E-02 |
| TNFSF8       | 7.00E-01 | 1.65E-02 |
| LOC101930421 | 7.00E-01 | 1.65E-02 |
| MIR6078      | 7.00E-01 | 1.65E-02 |
| LINC01517    | 7.00E-01 | 1.65E-02 |
| LINC01375    | 7.00E-01 | 1.65E-02 |
| HABP2        | 7.00E-01 | 1.65E-02 |
| TRIM34       | 7.00E-01 | 1.65E-02 |
| LOC105376571 | 7.00E-01 | 1.65E-02 |
| COX8A        | 7.00E-01 | 1.65E-02 |
| LOC105369526 | 7.00E-01 | 1.65E-02 |
| HYLS1        | 7.00E-01 | 1.65E-02 |
| SOX5.AS1     | 7.00E-01 | 1.65E-02 |
| TEX49        | 7.00E-01 | 1.65E-02 |
| NTS          | 7.00E-01 | 1.65E-02 |
| LOC102723381 | 7.00E-01 | 1.65E-02 |
| LOC107984601 | 7.00E-01 | 1.65E-02 |
| OR5AU1       | 7.00E-01 | 1.65E-02 |
| TRAV24       | 7.00E-01 | 1.65E-02 |
| SNORD56B     | 7.00E-01 | 1.65E-02 |
| ACSM5        | 7.00E-01 | 1.65E-02 |
| SMG1P2       | 7.00E-01 | 1.65E-02 |
| LOC105371351 | 7.00E-01 | 1.65E-02 |
| LOC100288728 | 7.00E-01 | 1.65E-02 |
| XAF1         | 7.00E-01 | 1.65E-02 |
| TBX21        | 7.00E-01 | 1.65E-02 |
| OTOP2        | 7.00E-01 | 1.65E-02 |
| CENPX        | 7.00E-01 | 1.65E-02 |
| KLHL14       | 7.00E-01 | 1.65E-02 |

|              |           |          |
|--------------|-----------|----------|
| LOC100505549 | 7.00E-01  | 1.65E-02 |
| LOC107985179 | 7.00E-01  | 1.65E-02 |
| LOC100996288 | 7.00E-01  | 1.65E-02 |
| PSG5         | 7.00E-01  | 1.65E-02 |
| MIR518E      | 7.00E-01  | 1.65E-02 |
| MIR548AG2    | 7.00E-01  | 1.65E-02 |
| LINC01718    | 7.00E-01  | 1.65E-02 |
| BCL2L13      | 7.00E-01  | 1.65E-02 |
| LOC105373016 | 7.00E-01  | 1.65E-02 |
| SREBF2.AS1   | 7.00E-01  | 1.65E-02 |
| ATP6AP2      | 7.00E-01  | 1.65E-02 |
| LOC107985665 | 7.00E-01  | 1.65E-02 |
| SATL1        | 7.00E-01  | 1.65E-02 |
| ALG13        | 7.00E-01  | 1.65E-02 |
| RNF220       | -7.00E-01 | 1.65E-02 |
| LOC105373945 | -7.00E-01 | 1.65E-02 |
| DKFZp434L192 | -7.00E-01 | 1.65E-02 |
| LOC105376271 | -7.00E-01 | 1.65E-02 |
| LINC01872    | -7.00E-01 | 1.65E-02 |
| LOC107985279 | -7.00E-01 | 1.65E-02 |
| XIST         | -7.00E-01 | 1.65E-02 |
| RNA45SN5     | -7.00E-01 | 1.65E-02 |
| LOC112268313 | -7.00E-01 | 1.65E-02 |
| INAVA        | -7.09E-01 | 1.46E-02 |
| KIF5C.AS1    | -7.09E-01 | 1.46E-02 |
| TRV.AAC1.3   | -7.09E-01 | 1.46E-02 |
| TSPYL4       | -7.09E-01 | 1.46E-02 |
| DKK1         | -7.09E-01 | 1.46E-02 |
| C11orf86     | -7.09E-01 | 1.46E-02 |
| ZNF335       | -7.09E-01 | 1.46E-02 |
| SSX2         | -7.09E-01 | 1.46E-02 |
| LOC107986830 | -7.18E-01 | 1.28E-02 |
| LOC105375805 | -7.18E-01 | 1.28E-02 |
| KIF20B       | -7.18E-01 | 1.28E-02 |
| LOC105378569 | -7.18E-01 | 1.28E-02 |
| MARVELD2_1   | -7.18E-01 | 1.28E-02 |
| GJA9.MYCBP   | -7.27E-01 | 1.12E-02 |
| FLVCR1       | -7.27E-01 | 1.12E-02 |
| HSPC324      | -7.27E-01 | 1.12E-02 |
| LOXL4        | -7.27E-01 | 1.12E-02 |
| DNMBP        | -7.27E-01 | 1.12E-02 |

|                |           |          |
|----------------|-----------|----------|
| LOC102723392   | -7.27E-01 | 1.12E-02 |
| SLIRP          | -7.27E-01 | 1.12E-02 |
| MIR10A         | -7.27E-01 | 1.12E-02 |
| TMED1          | -7.27E-01 | 1.12E-02 |
| LOC100128593   | -7.36E-01 | 9.76E-03 |
| PRPF31         | -7.36E-01 | 9.76E-03 |
| PISRT1         | -7.45E-01 | 8.45E-03 |
| GFUS           | -7.45E-01 | 8.45E-03 |
| HSD17B3.AS1    | -7.45E-01 | 8.45E-03 |
| SLC46A3        | -7.45E-01 | 8.45E-03 |
| MYBL2          | -7.45E-01 | 8.45E-03 |
| MOSMO_1        | -7.45E-01 | 8.45E-03 |
| TEX10          | -7.55E-01 | 7.28E-03 |
| TRAFD1         | -7.55E-01 | 7.28E-03 |
| KLK11          | -7.55E-01 | 7.28E-03 |
| RPS9           | -7.55E-01 | 7.28E-03 |
| LRP5L          | -7.55E-01 | 7.28E-03 |
| DHX36_1        | -7.55E-01 | 7.28E-03 |
| CRP            | -7.64E-01 | 6.23E-03 |
| PPP1R14B.AS1   | -7.64E-01 | 6.23E-03 |
| PPP1R9B        | -7.64E-01 | 6.23E-03 |
| MIR5008        | -7.73E-01 | 5.30E-03 |
| LOC105373582   | -7.73E-01 | 5.30E-03 |
| CXXC5          | -7.73E-01 | 5.30E-03 |
| LINC00965      | -7.73E-01 | 5.30E-03 |
| POLR2A         | -7.73E-01 | 5.30E-03 |
| LOC105371781   | -7.73E-01 | 5.30E-03 |
| LOXHD1         | -7.73E-01 | 5.30E-03 |
| LOC105372727   | -7.73E-01 | 5.30E-03 |
| LOC107987289   | -7.73E-01 | 5.30E-03 |
| LOC105378536_1 | -7.73E-01 | 5.30E-03 |
| POLR2A_1       | -7.73E-01 | 5.30E-03 |
| KRTAP5.6_1     | -7.73E-01 | 5.30E-03 |
| MPIG6B_5       | -7.73E-01 | 5.30E-03 |
| CYP21A2_4      | -7.73E-01 | 5.30E-03 |
| KIFC1_1        | -7.73E-01 | 5.30E-03 |
| KIR3DX1_2      | -7.73E-01 | 5.30E-03 |
| GOLGA6L3_1     | -7.82E-01 | 4.47E-03 |
| DLX4           | -7.91E-01 | 3.75E-03 |
| ITGA3          | -7.91E-01 | 3.75E-03 |
| LOC105372268   | -7.91E-01 | 3.75E-03 |

|              |           |          |
|--------------|-----------|----------|
| CEBPB        | -7.91E-01 | 3.75E-03 |
| PIP          | -8.00E-01 | 3.11E-03 |
| LOC105379533 | -8.00E-01 | 3.11E-03 |
| POLR3E_1     | -8.00E-01 | 3.11E-03 |
| LOC102723750 | -8.09E-01 | 2.56E-03 |
| ZNF213       | -8.18E-01 | 2.08E-03 |
| TTY7B        | -8.18E-01 | 2.08E-03 |
| LOC105372451 | -8.27E-01 | 1.68E-03 |
| DCD          | -8.55E-01 | 8.07E-04 |
| ENDOU        | -8.64E-01 | 6.12E-04 |
