# Supplementary material for: RNA Sequencing of Intestinal Enterocytes Pre- and Post-Roux-en-Y Gastric Bypass Reveals Alteration in Gene Expression Related to Enterocyte Differentiation, Restitution, and Obesity with Regulation by Schlafen 12
Source: MDPI journal article supplement (doi:10.3390/cells11203283), 2022-10-18
Supplement: s1 [file s1]

| Gene Name    | Detail                                      | Linear Relation with change of BMI |           |           |          | Correlation with Change of BMI |                  |
|--------------|---------------------------------------------|------------------------------------|-----------|-----------|----------|--------------------------------|------------------|
|              |                                             | Estimate                           | Std.Error | t.value   | Pvalue   | Correlation Value              | Correlation Pval |
| C11orf86     | chromosome 11 open reading frame 86         | -2.63E+01                          | 7.33E+00  | -3.59E+00 | 5.82E-03 | -7.09E-01                      | 1.46E-02         |
| LINC01061    | long intergenic non-protein coding RNA 1061 | 2.13E-01                           | 6.44E-02  | 3.30E+00  | 9.21E-03 | 8.00E-01                       | 3.11E-03         |
| LOC101928254 | uncharacterized LOC101928254                | 1.40E-01                           | 3.52E-02  | 3.97E+00  | 3.27E-03 | 8.64E-01                       | 6.12E-04         |
| LOC105371840 | uncharacterized LOC105371840                | 1.91E-01                           | 5.70E-02  | 3.36E+00  | 8.45E-03 | 7.36E-01                       | 9.76E-03         |
| LOC105373945 | uncharacterized LOC105373945                | -1.33E-01                          | 3.91E-02  | -3.40E+00 | 7.87E-03 | -7.00E-01                      | 1.65E-02         |
| LOC105375952 | uncharacterized LOC105375952                | 6.63E-02                           | 1.83E-02  | 3.62E+00  | 5.61E-03 | 8.18E-01                       | 2.08E-03         |
| LOC105377607 | uncharacterized LOC105377607                | 1.56E-01                           | 4.50E-02  | 3.48E+00  | 6.98E-03 | 7.00E-01                       | 1.65E-02         |
| LOC105379533 | translation initiation factor IF-2-like     | -4.63E-02                          | 1.35E-02  | -3.43E+00 | 7.52E-03 | -8.00E-01                      | 3.11E-03         |
| LOC107984334 | uncharacterized LOC107984334                | 2.07E+00                           | 5.78E-01  | 3.59E+00  | 5.86E-03 | 7.82E-01                       | 4.47E-03         |
| LOC107986830 | uncharacterized LOC107986830                | -6.54E+01                          | 1.86E+01  | -3.52E+00 | 6.54E-03 | -7.18E-01                      | 1.28E-02         |
| LOC112268129 | uncharacterized LOC112268129                | 1.04E+01                           | 2.97E+00  | 3.50E+00  | 6.76E-03 | 7.27E-01                       | 1.12E-02         |
| LOC112268313 | collagen alpha-1(I) chain-like              | -1.94E-01                          | 5.30E-02  | -3.66E+00 | 5.21E-03 | -7.00E-01                      | 1.65E-02         |
| PISRT1       | PISRT1 lncRNA                               | -1.08E+02                          | 2.33E+01  | -4.63E+00 | 1.23E-03 | -7.45E-01                      | 8.45E-03         |
| PPP1R14B-AS1 | PPP1R14B antisense RNA 1                    | -1.23E+01                          | 3.49E+00  | -3.53E+00 | 6.41E-03 | -7.64E-01                      | 6.23E-03         |
| QPCT         | glutaminyl-peptide cyclotransferase         | 1.37E-01                           | 3.47E-02  | 3.94E+00  | 3.39E-03 | 7.55E-01                       | 7.28E-03         |
| RNA45SN5     | RNA, 45S pre-ribosomal N5                   | -1.59E-01                          | 4.42E-02  | -3.61E+00 | 5.67E-03 | -7.00E-01                      | 1.65E-02         |
| RNF170       | ring finger protein 170                     | 8.80E-02                           | 2.52E-02  | 3.50E+00  | 6.75E-03 | 7.00E-01                       | 1.65E-02         |
| RPS9         | ribosomal protein S9                        | -8.07E+00                          | 2.43E+00  | -3.32E+00 | 9.00E-03 | -7.55E-01                      | 7.28E-03         |
| ZNF213       | zinc finger protein 213                     | -1.06E-01                          | 2.30E-02  | -4.61E+00 | 1.27E-03 | -8.18E-01                      | 2.08E-03         |
