# Supplementary material for: RNA Sequencing of Intestinal Enterocytes Pre- and Post-Roux-en-Y Gastric Bypass Reveals Alteration in Gene Expression Related to Enterocyte Differentiation, Restitution, and Obesity with Regulation by Schlafen 12
Source: MDPI journal article supplement (doi:10.3390/cells11203283), 2022-10-18
Supplement: s1 [file s1]

|             | RYGB (Pre vs Post) |            |         |          | BMI      |            |         |          | Interaction |            |         |          |
|-------------|--------------------|------------|---------|----------|----------|------------|---------|----------|-------------|------------|---------|----------|
|             | Estimate           | Std. Error | t value | Pval     | Estimate | Std. Error | t value | Pval     | Estimate    | Std. Error | t value | Pval     |
| SCGB3A1     | -22.014            | 4.456      | -4.941  | 1.06E-04 | -0.598   | 0.062      | -9.709  | 1.40E-08 | 0.598       | 0.104      | 5.748   | 1.90E-05 |
| MIR6503     | -101.561           | 24.566     | -4.134  | 6.23E-04 | -2.775   | 0.340      | -8.166  | 1.83E-07 | 2.775       | 0.574      | 4.834   | 1.33E-04 |
| LOC10798415 | -23.684            | 5.794      | -4.088  | 6.91E-04 | -0.643   | 0.080      | -8.017  | 2.38E-07 | 0.643       | 0.135      | 4.746   | 1.61E-04 |
| LOC10798543 | -237.996           | 62.090     | -3.833  | 1.22E-03 | -7.369   | 0.859      | -8.580  | 8.92E-08 | 6.697       | 1.451      | 4.616   | 2.14E-04 |
| MIR548P     | -174.994           | 46.415     | -3.770  | 1.40E-03 | -4.743   | 0.642      | -7.388  | 7.47E-07 | 4.743       | 1.084      | 4.374   | 3.66E-04 |
| MIR4645     | -91.594            | 24.475     | -3.742  | 1.49E-03 | -2.491   | 0.339      | -7.357  | 7.92E-07 | 2.491       | 0.572      | 4.355   | 3.82E-04 |
| LOC11226804 | -23.152            | 6.190      | -3.740  | 1.50E-03 | -0.624   | 0.086      | -7.291  | 8.95E-07 | 0.625       | 0.145      | 4.324   | 4.09E-04 |
| SNORA58B    | -131.266           | 36.123     | -3.634  | 1.90E-03 | -3.495   | 0.500      | -6.996  | 1.57E-06 | 3.495       | 0.844      | 4.141   | 6.13E-04 |
| SNORD5      | -127.871           | 36.862     | -3.469  | 2.74E-03 | -3.510   | 0.510      | -6.884  | 1.94E-06 | 3.510       | 0.861      | 4.075   | 7.10E-04 |
| CYP2D7_2    | -4.107             | 1.184      | -3.469  | 2.74E-03 | -0.113   | 0.016      | -6.884  | 1.94E-06 | 0.113       | 0.028      | 4.075   | 7.10E-04 |
| LINC01740   | -158.558           | 46.210     | -3.431  | 2.98E-03 | -4.567   | 0.639      | -7.145  | 1.18E-06 | 4.381       | 1.080      | 4.058   | 7.38E-04 |
| DCLRE1CP1   | -15.920            | 4.654      | -3.421  | 3.05E-03 | -0.437   | 0.064      | -6.792  | 2.32E-06 | 0.437       | 0.109      | 4.021   | 8.02E-04 |
| LOC10537814 | -4.428             | 1.311      | -3.378  | 3.35E-03 | -0.121   | 0.018      | -6.697  | 2.79E-06 | 0.121       | 0.031      | 3.965   | 9.09E-04 |
| LOC389831   | -1.170             | 0.346      | -3.378  | 3.35E-03 | -0.032   | 0.005      | -6.697  | 2.79E-06 | 0.032       | 0.008      | 3.965   | 9.09E-04 |
| IGKC        | -16.299            | 4.825      | -3.378  | 3.35E-03 | -0.447   | 0.067      | -6.697  | 2.79E-06 | 0.447       | 0.113      | 3.965   | 9.09E-04 |
| GLIS2_1     | -3.393             | 1.004      | -3.378  | 3.35E-03 | -0.093   | 0.014      | -6.697  | 2.79E-06 | 0.093       | 0.023      | 3.965   | 9.09E-04 |
| FOXL3.OT1   | -8.162             | 2.416      | -3.378  | 3.35E-03 | -0.224   | 0.033      | -6.697  | 2.79E-06 | 0.224       | 0.056      | 3.965   | 9.09E-04 |
| SNORD165    | -83.563            | 24.739     | -3.378  | 3.35E-03 | -2.292   | 0.342      | -6.697  | 2.79E-06 | 2.292       | 0.578      | 3.965   | 9.09E-04 |
| LOC10798743 | -4.019             | 1.190      | -3.378  | 3.35E-03 | -0.110   | 0.016      | -6.697  | 2.79E-06 | 0.110       | 0.028      | 3.965   | 9.09E-04 |
| MIR29A      | -41.129            | 12.176     | -3.378  | 3.35E-03 | -1.128   | 0.168      | -6.697  | 2.79E-06 | 1.128       | 0.284      | 3.965   | 9.09E-04 |
| SLC2A4RG    | -24.195            | 6.751      | -3.584  | 2.12E-03 | -0.499   | 0.093      | -5.347  | 4.41E-05 | 0.623       | 0.158      | 3.949   | 9.41E-04 |
| CPEB1       | -2.898             | 0.872      | -3.325  | 3.77E-03 | -0.078   | 0.012      | -6.443  | 4.61E-06 | 0.078       | 0.020      | 3.814   | 1.27E-03 |
| PARN_1      | -1.325             | 0.418      | -3.169  | 5.31E-03 | -0.036   | 0.006      | -6.297  | 6.17E-06 | 0.036       | 0.010      | 3.728   | 1.54E-03 |
| TTY9B       | -4.973             | 1.569      | -3.169  | 5.31E-03 | -0.137   | 0.022      | -6.297  | 6.17E-06 | 0.137       | 0.037      | 3.728   | 1.54E-03 |
| TRR.ACG2.4  | -111.510           | 35.189     | -3.169  | 5.31E-03 | -3.065   | 0.487      | -6.297  | 6.17E-06 | 3.065       | 0.822      | 3.728   | 1.54E-03 |
| B3GALT4_4   | -9.560             | 3.017      | -3.169  | 5.31E-03 | -0.263   | 0.042      | -6.297  | 6.17E-06 | 0.263       | 0.070      | 3.728   | 1.54E-03 |
| TRBV2       | -23.459            | 7.403      | -3.169  | 5.31E-03 | -0.645   | 0.102      | -6.297  | 6.17E-06 | 0.645       | 0.173      | 3.728   | 1.54E-03 |
| MIR593      | -81.403            | 25.688     | -3.169  | 5.31E-03 | -2.237   | 0.355      | -6.297  | 6.17E-06 | 2.237       | 0.600      | 3.728   | 1.54E-03 |
| DEFB103B_2  | -7.857             | 2.480      | -3.169  | 5.31E-03 | -0.216   | 0.034      | -6.297  | 6.17E-06 | 0.216       | 0.058      | 3.728   | 1.54E-03 |
| LOC10537943 | -14.281            | 4.507      | -3.169  | 5.31E-03 | -0.393   | 0.062      | -6.297  | 6.17E-06 | 0.393       | 0.105      | 3.728   | 1.54E-03 |
| MIR3606     | -64.605            | 20.387     | -3.169  | 5.31E-03 | -1.776   | 0.282      | -6.297  | 6.17E-06 | 1.776       | 0.476      | 3.728   | 1.54E-03 |
| LOC10798735 | -0.799             | 0.252      | -3.169  | 5.31E-03 | -0.022   | 0.003      | -6.297  | 6.17E-06 | 0.022       | 0.006      | 3.728   | 1.54E-03 |
| LOC11226829 | -26.515            | 8.367      | -3.169  | 5.31E-03 | -0.729   | 0.116      | -6.297  | 6.17E-06 | 0.729       | 0.196      | 3.728   | 1.54E-03 |
| LOC10192977 | -15.634            | 4.659      | -3.355  | 3.52E-03 | -0.277   | 0.064      | -4.296  | 4.35E-04 | 0.402       | 0.109      | 3.692   | 1.67E-03 |
| CENPS.CORT  | -4.621             | 1.470      | -3.143  | 5.62E-03 | -0.125   | 0.020      | -6.163  | 8.09E-06 | 0.125       | 0.034      | 3.648   | 1.84E-03 |
| LOC10798475 | -68.732            | 21.928     | -3.134  | 5.73E-03 | -1.701   | 0.303      | -5.607  | 2.55E-05 | 1.865       | 0.512      | 3.640   | 1.87E-03 |
| LOC10192870 | 106.023            | 25.767     | 4.115   | 6.51E-04 | -0.136   | 0.356      | -0.383  | 7.06E-01 | -2.174      | 0.602      | -3.611  | 2.00E-03 |
| FRMPD1      | 82.198             | 23.210     | 3.541   | 2.33E-03 | 0.478    | 0.321      | 1.489   | 1.54E-01 | -1.957      | 0.542      | -3.609  | 2.00E-03 |
| PAFAH1B3    | -32.856            | 10.214     | -3.217  | 4.78E-03 | -0.778   | 0.141      | -5.508  | 3.14E-05 | 0.860       | 0.239      | 3.604   | 2.03E-03 |
| LOC10099684 | -26.047            | 8.683      | -3.000  | 7.69E-03 | -0.770   | 0.120      | -6.410  | 4.92E-06 | 0.725       | 0.203      | 3.574   | 2.17E-03 |
| MAFA        | -99.195            | 27.082     | -3.663  | 1.78E-03 | -0.154   | 0.375      | -0.410  | 6.87E-01 | 2.259       | 0.633      | 3.570   | 2.19E-03 |
| IGLV1.62    | -46.602            | 16.123     | -2.890  | 9.74E-03 | -1.544   | 0.223      | -6.926  | 1.79E-06 | 1.345       | 0.377      | 3.569   | 2.19E-03 |
| FAM197Y6    | -38.934            | 12.794     | -3.043  | 7.00E-03 | -1.067   | 0.177      | -6.027  | 1.07E-05 | 1.067       | 0.299      | 3.568   | 2.20E-03 |
| MIR4517     | -167.872           | 53.804     | -3.120  | 5.91E-03 | -3.837   | 0.744      | -5.155  | 6.64E-05 | 4.476       | 1.257      | 3.560   | 2.24E-03 |
| LOC10272375 | -251.754           | 70.889     | -3.551  | 2.28E-03 | -1.186   | 0.981      | -1.209  | 2.42E-01 | 5.837       | 1.656      | 3.524   | 2.42E-03 |
| TRG.CCC4.1  | -455.647           | 146.070    | -3.119  | 5.92E-03 | -9.840   | 2.020      | -4.870  | 1.23E-04 | 11.974      | 3.413      | 3.508   | 2.51E-03 |
| LINC02017   | -18.786            | 6.113      | -3.073  | 6.56E-03 | -0.499   | 0.085      | -5.905  | 1.37E-05 | 0.499       | 0.143      | 3.496   | 2.58E-03 |
| MIR382      | -997.883           | 291.375    | -3.425  | 3.02E-03 | -7.121   | 4.030      | -1.767  | 9.42E-02 | 23.706      | 6.808      | 3.482   | 2.66E-03 |
| GON4L       | 93.016             | 27.925     | 3.331   | 3.72E-03 | 0.699    | 0.386      | 1.810   | 8.70E-02 | -2.259      | 0.652      | -3.462  | 2.78E-03 |
| SRPK2       | -129.520           | 36.649     | -3.534  | 2.37E-03 | -0.219   | 0.507      | -0.431  | 6.71E-01 | 2.963       | 0.856      | 3.460   | 2.80E-03 |
| MIR493      | -526.831           | 176.500    | -2.985  | 7.94E-03 | -14.266  | 2.441      | -5.844  | 1.55E-05 | 14.266      | 4.124      | 3.459   | 2.80E-03 |

|            |          |         |        |          |         |       |        |          |         |        |        |          |
|------------|----------|---------|--------|----------|---------|-------|--------|----------|---------|--------|--------|----------|
| MIR1285.1  | -147.316 | 49.114  | -3.000 | 7.69E-03 | -3.939  | 0.679 | -5.799 | 1.71E-05 | 3.939   | 1.148  | 3.433  | 2.97E-03 |
| LOC1053706 | -123.697 | 38.415  | -3.220 | 4.75E-03 | -1.419  | 0.531 | -2.670 | 1.56E-02 | 3.071   | 0.898  | 3.421  | 3.05E-03 |
| ANKRD26    | 55.275   | 15.932  | 3.469  | 2.74E-03 | 0.120   | 0.220 | 0.544  | 5.93E-01 | -1.271  | 0.372  | -3.415 | 3.08E-03 |
| PKD1L2     | 64.139   | 18.930  | 3.388  | 3.28E-03 | 0.310   | 0.262 | 1.185  | 2.51E-01 | -1.510  | 0.442  | -3.415 | 3.09E-03 |
| LOC1053759 | 243.360  | 66.055  | 3.684  | 1.70E-03 | 0.707   | 0.914 | 0.773  | 4.49E-01 | -5.259  | 1.543  | -3.408 | 3.14E-03 |
| MIR548AG1  | -224.410 | 75.613  | -2.968 | 8.24E-03 | -6.009  | 1.046 | -5.746 | 1.91E-05 | 6.009   | 1.767  | 3.401  | 3.18E-03 |
| LOC1053719 | -16.514  | 5.608   | -2.945 | 8.66E-03 | -0.445  | 0.078 | -5.737 | 1.94E-05 | 0.445   | 0.131  | 3.397  | 3.22E-03 |
| NEK8       | -308.388 | 89.479  | -3.447 | 2.88E-03 | -0.542  | 1.238 | -0.438 | 6.67E-01 | 6.975   | 2.091  | 3.336  | 3.68E-03 |
| CHRFAM7A   | 21.241   | 5.662   | 3.752  | 1.46E-03 | 0.001   | 0.078 | 0.008  | 9.94E-01 | -0.440  | 0.132  | -3.327 | 3.75E-03 |
| IFNL3      | 199.891  | 53.863  | 3.711  | 1.60E-03 | -0.001  | 0.745 | -0.001 | 9.99E-01 | -4.170  | 1.259  | -3.314 | 3.86E-03 |
| PYDC2      | -51.886  | 19.812  | -2.619 | 1.74E-02 | -1.844  | 0.274 | -6.730 | 2.62E-06 | 1.529   | 0.463  | 3.303  | 3.95E-03 |
| NF1        | 80.257   | 26.958  | 2.977  | 8.08E-03 | 0.818   | 0.373 | 2.195  | 4.16E-02 | -2.068  | 0.630  | -3.283 | 4.13E-03 |
| AASS       | -218.435 | 66.049  | -3.307 | 3.92E-03 | -0.785  | 0.914 | -0.860 | 4.01E-01 | 5.059   | 1.543  | 3.278  | 4.18E-03 |
| LOC1053709 | 334.167  | 90.278  | 3.702  | 1.63E-03 | -0.118  | 1.249 | -0.095 | 9.26E-01 | -6.878  | 2.109  | -3.261 | 4.34E-03 |
| TRAJ17     | -293.277 | 110.473 | -2.655 | 1.61E-02 | -9.394  | 1.528 | -6.148 | 8.34E-06 | 8.414   | 2.581  | 3.260  | 4.35E-03 |
| GPRC5A     | 57.069   | 19.147  | 2.981  | 8.02E-03 | 0.563   | 0.265 | 2.124  | 4.78E-02 | -1.451  | 0.447  | -3.244 | 4.50E-03 |
| ACSBG1     | -77.061  | 23.890  | -3.226 | 4.69E-03 | -0.270  | 0.330 | -0.817 | 4.25E-01 | 1.804   | 0.558  | 3.233  | 4.62E-03 |
| LOC1079846 | -170.091 | 52.757  | -3.224 | 4.71E-03 | -1.010  | 0.730 | -1.384 | 1.83E-01 | 3.983   | 1.233  | 3.231  | 4.64E-03 |
| MIR124.1HG | -4.279   | 1.477   | -2.897 | 9.61E-03 | -0.077  | 0.020 | -3.748 | 1.47E-03 | 0.111   | 0.035  | 3.229  | 4.65E-03 |
| LINC01911  | 135.614  | 43.821  | 3.095  | 6.25E-03 | 0.921   | 0.606 | 1.520  | 1.46E-01 | -3.305  | 1.024  | -3.228 | 4.67E-03 |
| RIMBP3C    | -10.058  | 3.341   | -3.011 | 7.51E-03 | -0.147  | 0.046 | -3.189 | 5.08E-03 | 0.252   | 0.078  | 3.228  | 4.67E-03 |
| RNU6.7     | -51.477  | 18.793  | -2.739 | 1.35E-02 | -1.416  | 0.260 | -5.449 | 3.55E-05 | 1.416   | 0.439  | 3.226  | 4.69E-03 |
| RASSF7     | -10.134  | 3.700   | -2.739 | 1.35E-02 | -0.279  | 0.051 | -5.449 | 3.55E-05 | 0.279   | 0.086  | 3.226  | 4.69E-03 |
| HCG18_2    | -0.619   | 0.226   | -2.739 | 1.35E-02 | -0.017  | 0.003 | -5.449 | 3.55E-05 | 0.017   | 0.005  | 3.226  | 4.69E-03 |
| DHODH      | 84.056   | 25.849  | 3.252  | 4.43E-03 | 0.442   | 0.358 | 1.236  | 2.32E-01 | -1.947  | 0.604  | -3.223 | 4.72E-03 |
| MIR105.2   | 1327.416 | 373.271 | 3.556  | 2.26E-03 | 0.154   | 5.163 | 0.030  | 9.77E-01 | -27.810 | 8.721  | -3.189 | 5.09E-03 |
| SYP        | 58.065   | 16.636  | 3.490  | 2.61E-03 | 0.059   | 0.230 | 0.257  | 8.00E-01 | -1.239  | 0.389  | -3.188 | 5.10E-03 |
| ZNF460.AS1 | 162.951  | 49.029  | 3.324  | 3.78E-03 | 0.619   | 0.678 | 0.913  | 3.73E-01 | -3.645  | 1.146  | -3.182 | 5.16E-03 |
| LOC1079846 | -83.799  | 30.198  | -2.775 | 1.25E-02 | -1.898  | 0.418 | -4.545 | 2.51E-04 | 2.243   | 0.706  | 3.179  | 5.20E-03 |
| LRIG2.DT   | -17.080  | 5.739   | -2.976 | 8.09E-03 | -0.261  | 0.079 | -3.284 | 4.12E-03 | 0.426   | 0.134  | 3.177  | 5.22E-03 |
| OVOL1.AS1  | -20.239  | 7.448   | -2.717 | 1.41E-02 | -0.552  | 0.103 | -5.359 | 4.29E-05 | 0.552   | 0.174  | 3.173  | 5.27E-03 |
| TMEM127    | -91.725  | 28.444  | -3.225 | 4.70E-03 | -0.157  | 0.393 | -0.400 | 6.94E-01 | 2.100   | 0.665  | 3.159  | 5.43E-03 |
| LOC1053700 | 144.895  | 37.976  | 3.815  | 1.27E-03 | -0.594  | 0.525 | -1.130 | 2.73E-01 | -2.794  | 0.887  | -3.149 | 5.55E-03 |
| LOC1125775 | 156.092  | 43.100  | 3.622  | 1.95E-03 | -0.239  | 0.596 | -0.401 | 6.93E-01 | -3.167  | 1.007  | -3.145 | 5.60E-03 |
| OCEL1      | 79.953   | 23.680  | 3.376  | 3.36E-03 | 0.262   | 0.328 | 0.800  | 4.34E-01 | -1.738  | 0.553  | -3.141 | 5.65E-03 |
| LOC1053720 | 80.002   | 21.863  | 3.659  | 1.79E-03 | -0.177  | 0.302 | -0.585 | 5.66E-01 | -1.601  | 0.511  | -3.134 | 5.73E-03 |
| ERCC8.AS1  | -312.403 | 97.248  | -3.212 | 4.83E-03 | -0.786  | 1.345 | -0.584 | 5.66E-01 | 7.122   | 2.272  | 3.134  | 5.73E-03 |
| LOC1122681 | -45.026  | 15.911  | -2.830 | 1.11E-02 | -0.934  | 0.220 | -4.245 | 4.87E-04 | 1.165   | 0.372  | 3.134  | 5.74E-03 |
| FAM247D    | 21.837   | 6.834   | 3.195  | 5.01E-03 | 0.104   | 0.095 | 1.104  | 2.84E-01 | -0.498  | 0.160  | -3.120 | 5.91E-03 |
| DDAH1      | 127.617  | 42.004  | 3.038  | 7.07E-03 | 1.043   | 0.581 | 1.795  | 8.95E-02 | -3.059  | 0.981  | -3.117 | 5.95E-03 |
| TRQ.CTG4.1 | -376.620 | 141.503 | -2.662 | 1.59E-02 | -10.290 | 1.957 | -5.257 | 5.34E-05 | 10.290  | 3.306  | 3.112  | 6.01E-03 |
| GPR22      | 3.826    | 1.080   | 3.542  | 2.33E-03 | 0.000   | 0.015 | 0.000  | 1.00E+00 | -0.078  | 0.025  | -3.104 | 6.13E-03 |
| KCNIP3     | 59.590   | 16.452  | 3.622  | 1.95E-03 | -0.159  | 0.228 | -0.699 | 4.94E-01 | -1.193  | 0.384  | -3.103 | 6.13E-03 |
| LOC1079845 | -180.167 | 67.919  | -2.653 | 1.62E-02 | -5.147  | 0.939 | -5.478 | 3.34E-05 | 4.918   | 1.587  | 3.099  | 6.19E-03 |
| SORBS1     | -195.194 | 61.915  | -3.153 | 5.51E-03 | -0.351  | 0.856 | -0.409 | 6.87E-01 | 4.481   | 1.447  | 3.098  | 6.21E-03 |
| GRAPL      | -10.516  | 3.849   | -2.732 | 1.37E-02 | -0.201  | 0.053 | -3.777 | 1.38E-03 | 0.278   | 0.090  | 3.089  | 6.33E-03 |
| KRTAP19.2  | -80.615  | 31.062  | -2.595 | 1.83E-02 | -2.224  | 0.430 | -5.176 | 6.35E-05 | 2.233   | 0.726  | 3.077  | 6.50E-03 |
| GGH        | -151.350 | 51.506  | -2.939 | 8.78E-03 | -1.368  | 0.712 | -1.920 | 7.08E-02 | 3.703   | 1.203  | 3.077  | 6.50E-03 |
| LOC149684  | 263.472  | 82.801  | 3.182  | 5.16E-03 | 1.274   | 1.145 | 1.112  | 2.81E-01 | -5.931  | 1.935  | -3.066 | 6.66E-03 |
| TRR.TCT3.2 | 1661.210 | 522.471 | 3.180  | 5.19E-03 | 8.727   | 7.227 | 1.208  | 2.43E-01 | -37.424 | 12.207 | -3.066 | 6.66E-03 |
| MIR554     | -202.240 | 72.321  | -2.796 | 1.19E-02 | -3.395  | 1.000 | -3.393 | 3.24E-03 | 5.177   | 1.690  | 3.064  | 6.69E-03 |
| LOC1009966 | -266.524 | 84.928  | -3.138 | 5.68E-03 | -0.046  | 1.175 | -0.039 | 9.69E-01 | 6.053   | 1.984  | 3.050  | 6.89E-03 |
| SLC38A1    | -83.711  | 27.597  | -3.033 | 7.15E-03 | -0.160  | 0.382 | -0.419 | 6.80E-01 | 1.965   | 0.645  | 3.047  | 6.94E-03 |

|             |          |         |        |          |         |       |        |          |         |       |        |          |
|-------------|----------|---------|--------|----------|---------|-------|--------|----------|---------|-------|--------|----------|
| TRAV13.1    | 189.153  | 55.640  | 3.400  | 3.19E-03 | 0.097   | 0.770 | 0.126  | 9.01E-01 | -3.954  | 1.300 | -3.042 | 7.02E-03 |
| TRNAV.CAC_  | 262.186  | 76.420  | 3.431  | 2.98E-03 | 0.000   | 1.057 | 0.000  | 1.00E+00 | -5.425  | 1.786 | -3.038 | 7.07E-03 |
| LINC01901   | 324.675  | 92.025  | 3.528  | 2.40E-03 | -0.514  | 1.273 | -0.404 | 6.91E-01 | -6.531  | 2.150 | -3.038 | 7.08E-03 |
| SNORA71D    | 292.347  | 86.173  | 3.393  | 3.24E-03 | 0.073   | 1.192 | 0.061  | 9.52E-01 | -6.115  | 2.013 | -3.037 | 7.09E-03 |
| ETDA        | 43.943   | 13.153  | 3.341  | 3.64E-03 | -0.013  | 0.182 | -0.071 | 9.44E-01 | -0.933  | 0.307 | -3.034 | 7.13E-03 |
| HTT.AS      | 187.412  | 55.001  | 3.407  | 3.14E-03 | 0.013   | 0.761 | 0.017  | 9.87E-01 | -3.895  | 1.285 | -3.031 | 7.18E-03 |
| IBA57.DT    | 49.435   | 13.549  | 3.649  | 1.84E-03 | -0.225  | 0.187 | -1.202 | 2.45E-01 | -0.959  | 0.317 | -3.029 | 7.21E-03 |
| MIR599      | -193.877 | 67.924  | -2.854 | 1.05E-02 | -2.674  | 0.940 | -2.846 | 1.07E-02 | 4.801   | 1.587 | 3.025  | 7.28E-03 |
| TSBP1_1     | -54.631  | 17.313  | -3.156 | 5.47E-03 | 0.000   | 0.239 | 0.000  | 1.00E+00 | 1.222   | 0.405 | 3.022  | 7.33E-03 |
| MAP3K8      | 73.797   | 23.296  | 3.168  | 5.33E-03 | 0.196   | 0.322 | 0.607  | 5.51E-01 | -1.644  | 0.544 | -3.020 | 7.36E-03 |
| LOC10798539 | -249.101 | 88.166  | -2.825 | 1.12E-02 | -3.979  | 1.220 | -3.263 | 4.32E-03 | 6.221   | 2.060 | 3.020  | 7.36E-03 |
| DOCK8       | 81.199   | 27.438  | 2.959  | 8.39E-03 | 0.502   | 0.380 | 1.324  | 2.02E-01 | -1.936  | 0.641 | -3.020 | 7.36E-03 |
| CYP21A2_5   | 2.681    | 0.784   | 3.419  | 3.06E-03 | 0.000   | 0.011 | 0.000  | 1.00E+00 | -0.055  | 0.018 | -3.016 | 7.42E-03 |
| SNORA71C    | 78.564   | 22.979  | 3.419  | 3.06E-03 | 0.000   | 0.318 | 0.000  | 1.00E+00 | -1.619  | 0.537 | -3.016 | 7.42E-03 |
| LINC01903   | 137.788  | 46.423  | 2.968  | 8.24E-03 | 0.875   | 0.642 | 1.362  | 1.90E-01 | -3.270  | 1.085 | -3.015 | 7.44E-03 |
| LOC10272360 | 123.316  | 37.034  | 3.330  | 3.73E-03 | 0.071   | 0.512 | 0.139  | 8.91E-01 | -2.607  | 0.865 | -3.013 | 7.46E-03 |
| LOC1079848  | -266.391 | 86.956  | -3.064 | 6.69E-03 | -0.195  | 1.203 | -0.162 | 8.73E-01 | 6.109   | 2.032 | 3.007  | 7.57E-03 |
| INSYN1.AS1  | 187.065  | 55.331  | 3.381  | 3.33E-03 | -0.309  | 0.765 | -0.404 | 6.91E-01 | -3.886  | 1.293 | -3.006 | 7.59E-03 |
| NOTCH4_2    | -1.493   | 0.562   | -2.654 | 1.61E-02 | -0.039  | 0.008 | -5.075 | 7.89E-05 | 0.039   | 0.013 | 3.005  | 7.61E-03 |
| HSBP1L1     | -65.718  | 25.245  | -2.603 | 1.80E-02 | -1.860  | 0.349 | -5.328 | 4.59E-05 | 1.772   | 0.590 | 3.004  | 7.61E-03 |
| LOC10537578 | 51.643   | 17.008  | 3.036  | 7.10E-03 | 0.393   | 0.235 | 1.670  | 1.12E-01 | -1.193  | 0.397 | -3.002 | 7.66E-03 |
| IRAK1       | -165.505 | 54.167  | -3.055 | 6.81E-03 | -0.643  | 0.749 | -0.858 | 4.02E-01 | 3.792   | 1.266 | 2.996  | 7.75E-03 |
| SNORD126    | 328.897  | 99.799  | 3.296  | 4.02E-03 | 0.326   | 1.380 | 0.236  | 8.16E-01 | -6.979  | 2.332 | -2.993 | 7.81E-03 |
| LOC1053726  | -236.956 | 88.185  | -2.687 | 1.51E-02 | -4.744  | 1.220 | -3.889 | 1.08E-03 | 6.152   | 2.060 | 2.986  | 7.92E-03 |
| LINC00471   | 139.180  | 42.500  | 3.275  | 4.21E-03 | 0.140   | 0.588 | 0.238  | 8.14E-01 | -2.954  | 0.993 | -2.975 | 8.11E-03 |
| AUH         | 71.736   | 26.716  | 2.685  | 1.51E-02 | 0.586   | 0.370 | 1.585  | 1.30E-01 | -1.856  | 0.624 | -2.973 | 8.15E-03 |
| MUTYH       | -236.088 | 77.590  | -3.043 | 7.00E-03 | -0.479  | 1.073 | -0.446 | 6.61E-01 | 5.377   | 1.813 | 2.966  | 8.27E-03 |
| MIR125B1    | 932.207  | 276.105 | 3.376  | 3.36E-03 | -1.166  | 3.819 | -0.305 | 7.64E-01 | -19.096 | 6.451 | -2.960 | 8.38E-03 |
| USF3        | 58.946   | 18.371  | 3.209  | 4.87E-03 | -0.048  | 0.254 | -0.189 | 8.52E-01 | -1.268  | 0.429 | -2.954 | 8.49E-03 |
| LOC1053725  | 169.397  | 52.243  | 3.242  | 4.52E-03 | 0.163   | 0.723 | 0.226  | 8.24E-01 | -3.605  | 1.221 | -2.953 | 8.50E-03 |
| SNORD116.7  | -334.671 | 134.337 | -2.491 | 2.27E-02 | -9.583  | 1.858 | -5.157 | 6.62E-05 | 9.264   | 3.139 | 2.952  | 8.54E-03 |
| ALOX12P2    | -183.336 | 59.865  | -3.063 | 6.71E-03 | -0.218  | 0.828 | -0.264 | 7.95E-01 | 4.128   | 1.399 | 2.951  | 8.54E-03 |
| PRAMEF18    | 70.920   | 26.173  | 2.710  | 1.44E-02 | 0.806   | 0.362 | 2.225  | 3.91E-02 | -1.804  | 0.612 | -2.950 | 8.56E-03 |
| SNORD62A    | -110.675 | 48.489  | -2.282 | 3.48E-02 | -4.280  | 0.671 | -6.382 | 5.20E-06 | 3.340   | 1.133 | 2.948  | 8.60E-03 |
| GOLGA8EP_2  | -1.337   | 0.521   | -2.567 | 1.94E-02 | -0.036  | 0.007 | -4.980 | 9.70E-05 | 0.036   | 0.012 | 2.948  | 8.60E-03 |
| CACNG8      | -117.072 | 40.369  | -2.900 | 9.54E-03 | -0.662  | 0.558 | -1.185 | 2.51E-01 | 2.777   | 0.943 | 2.944  | 8.68E-03 |
| RPF1        | 138.841  | 44.688  | 3.107  | 6.09E-03 | 0.046   | 0.618 | 0.075  | 9.41E-01 | -3.071  | 1.044 | -2.941 | 8.73E-03 |
| WSCD1       | 61.258   | 19.015  | 3.222  | 4.73E-03 | -0.076  | 0.263 | -0.287 | 7.77E-01 | -1.306  | 0.444 | -2.940 | 8.76E-03 |
| DOC2B_1     | -2.292   | 0.921   | -2.489 | 2.28E-02 | -0.063  | 0.013 | -4.954 | 1.03E-04 | 0.063   | 0.022 | 2.933  | 8.89E-03 |
| IGKJ5       | -365.576 | 146.881 | -2.489 | 2.28E-02 | -10.065 | 2.032 | -4.954 | 1.03E-04 | 10.065  | 3.432 | 2.933  | 8.89E-03 |
| MIR4705     | -97.830  | 39.306  | -2.489 | 2.28E-02 | -2.693  | 0.544 | -4.954 | 1.03E-04 | 2.693   | 0.918 | 2.933  | 8.89E-03 |
| ZNF800      | -39.457  | 13.708  | -2.878 | 1.00E-02 | -0.302  | 0.190 | -1.595 | 1.28E-01 | 0.939   | 0.320 | 2.932  | 8.91E-03 |
| LETM2       | -194.020 | 66.253  | -2.928 | 8.98E-03 | -0.762  | 0.916 | -0.831 | 4.17E-01 | 4.533   | 1.548 | 2.929  | 8.97E-03 |
| PAQR8       | -81.807  | 30.094  | -2.718 | 1.41E-02 | -0.857  | 0.416 | -2.058 | 5.44E-02 | 2.059   | 0.703 | 2.928  | 8.99E-03 |
| SUCLG1      | 180.374  | 56.583  | 3.188  | 5.10E-03 | 0.095   | 0.783 | 0.122  | 9.05E-01 | -3.862  | 1.322 | -2.921 | 9.12E-03 |
| RASGRF2.AS1 | 200.980  | 68.467  | 2.935  | 8.84E-03 | 1.045   | 0.947 | 1.103  | 2.84E-01 | -4.661  | 1.600 | -2.913 | 9.27E-03 |
| LOC1079848  | -3.316   | 1.334   | -2.485 | 2.30E-02 | -0.091  | 0.018 | -4.915 | 1.12E-04 | 0.091   | 0.031 | 2.910  | 9.34E-03 |
| LINC01193   | -5.737   | 2.194   | -2.615 | 1.75E-02 | -0.101  | 0.030 | -3.320 | 3.81E-03 | 0.149   | 0.051 | 2.908  | 9.38E-03 |
| LOC1053739  | -70.629  | 30.362  | -2.326 | 3.19E-02 | -2.341  | 0.420 | -5.574 | 2.73E-05 | 2.062   | 0.709 | 2.906  | 9.42E-03 |
| FAM74A4     | -31.385  | 12.202  | -2.572 | 1.92E-02 | -0.611  | 0.169 | -3.622 | 1.95E-03 | 0.828   | 0.285 | 2.905  | 9.44E-03 |
| PRADC1      | -99.027  | 35.253  | -2.809 | 1.16E-02 | -0.908  | 0.488 | -1.862 | 7.89E-02 | 2.392   | 0.824 | 2.904  | 9.46E-03 |
| PKD1P6.NPIP | 9.093    | 2.781   | 3.270  | 4.25E-03 | 0.000   | 0.038 | 0.000  | 1.00E+00 | -0.188  | 0.065 | -2.901 | 9.53E-03 |
| LOC1019295  | 98.954   | 29.660  | 3.336  | 3.67E-03 | -0.189  | 0.410 | -0.462 | 6.50E-01 | -2.000  | 0.693 | -2.886 | 9.85E-03 |

|             |          |         |        |          |        |       |        |          |         |       |        |          |
|-------------|----------|---------|--------|----------|--------|-------|--------|----------|---------|-------|--------|----------|
| SMG6        | 59.328   | 18.387  | 3.227  | 4.68E-03 | -0.048 | 0.254 | -0.189 | 8.52E-01 | -1.238  | 0.430 | -2.881 | 9.95E-03 |
| RRN3        | 9.709    | 3.116   | 3.116  | 5.97E-03 | 0.011  | 0.043 | 0.263  | 7.95E-01 | -0.210  | 0.073 | -2.879 | 9.98E-03 |
| BICD1       | 72.642   | 24.088  | 3.016  | 7.43E-03 | 0.008  | 0.333 | 0.024  | 9.81E-01 | -1.617  | 0.563 | -2.872 | 1.01E-02 |
| LOC10798675 | 149.982  | 48.090  | 3.119  | 5.93E-03 | 0.321  | 0.665 | 0.482  | 6.35E-01 | -3.218  | 1.124 | -2.864 | 1.03E-02 |
| LOC10537494 | -159.739 | 67.037  | -2.383 | 2.84E-02 | -5.067 | 0.927 | -5.465 | 3.44E-05 | 4.482   | 1.566 | 2.861  | 1.04E-02 |
| LOC10537387 | -43.552  | 17.943  | -2.427 | 2.59E-02 | -1.271 | 0.248 | -5.121 | 7.15E-05 | 1.198   | 0.419 | 2.859  | 1.04E-02 |
| LOC10272333 | 488.965  | 172.890 | 2.828  | 1.11E-02 | 3.708  | 2.391 | 1.550  | 1.38E-01 | -11.547 | 4.040 | -2.858 | 1.04E-02 |
| CTB.1I21.1  | -205.004 | 74.307  | -2.759 | 1.29E-02 | -1.365 | 1.028 | -1.328 | 2.01E-01 | 4.949   | 1.736 | 2.850  | 1.06E-02 |
| SNORD15B    | -122.941 | 50.283  | -2.445 | 2.50E-02 | -3.348 | 0.696 | -4.814 | 1.39E-04 | 3.348   | 1.175 | 2.850  | 1.06E-02 |
| LINC01093   | 151.650  | 50.269  | 3.017  | 7.41E-03 | 0.501  | 0.695 | 0.721  | 4.80E-01 | -3.347  | 1.175 | -2.849 | 1.06E-02 |
| IGKV2.4_1   | -15.877  | 6.043   | -2.627 | 1.71E-02 | -0.262 | 0.084 | -3.132 | 5.76E-03 | 0.402   | 0.141 | 2.848  | 1.07E-02 |
| IGSF21      | -228.589 | 77.696  | -2.942 | 8.71E-03 | -0.139 | 1.075 | -0.129 | 8.99E-01 | 5.166   | 1.815 | 2.846  | 1.07E-02 |
| LOC10798605 | -134.512 | 51.096  | -2.633 | 1.69E-02 | -2.175 | 0.707 | -3.077 | 6.49E-03 | 3.395   | 1.194 | 2.844  | 1.08E-02 |
| NAP1L4_1    | 19.892   | 6.629   | 3.001  | 7.67E-03 | 0.061  | 0.092 | 0.660  | 5.17E-01 | -0.440  | 0.155 | -2.842 | 1.08E-02 |
| CCL23_1     | -14.086  | 5.681   | -2.479 | 2.33E-02 | -0.377 | 0.079 | -4.798 | 1.44E-04 | 0.377   | 0.133 | 2.841  | 1.08E-02 |
| LINC01741   | 159.097  | 60.871  | 2.614  | 1.76E-02 | 1.684  | 0.842 | 2.000  | 6.08E-02 | -4.039  | 1.422 | -2.840 | 1.09E-02 |
| LOC10798610 | 423.162  | 131.978 | 3.206  | 4.89E-03 | 0.208  | 1.826 | 0.114  | 9.11E-01 | -8.756  | 3.084 | -2.840 | 1.09E-02 |
| H2BW1       | 100.537  | 30.403  | 3.307  | 3.92E-03 | -0.258 | 0.421 | -0.614 | 5.47E-01 | -2.016  | 0.710 | -2.839 | 1.09E-02 |
| CLEC10A     | -140.510 | 48.472  | -2.899 | 9.57E-03 | -0.347 | 0.670 | -0.518 | 6.11E-01 | 3.210   | 1.133 | 2.834  | 1.10E-02 |
| LY9         | -160.259 | 56.037  | -2.860 | 1.04E-02 | -0.444 | 0.775 | -0.573 | 5.73E-01 | 3.708   | 1.309 | 2.832  | 1.10E-02 |
| C4orf48     | 62.350   | 20.536  | 3.036  | 7.11E-03 | 0.015  | 0.284 | 0.051  | 9.60E-01 | -1.359  | 0.480 | -2.832 | 1.11E-02 |
| FAM197Y4    | -94.945  | 35.508  | -2.674 | 1.55E-02 | -1.267 | 0.491 | -2.579 | 1.89E-02 | 2.348   | 0.830 | 2.831  | 1.11E-02 |
| TACO1       | -50.635  | 21.911  | -2.311 | 3.29E-02 | -1.583 | 0.303 | -5.224 | 5.74E-05 | 1.448   | 0.512 | 2.829  | 1.11E-02 |
| LINC02526   | 209.274  | 64.608  | 3.239  | 4.55E-03 | -0.468 | 0.894 | -0.523 | 6.07E-01 | -4.269  | 1.510 | -2.828 | 1.11E-02 |
| LOC10537567 | -147.511 | 58.720  | -2.512 | 2.18E-02 | -3.099 | 0.812 | -3.815 | 1.27E-03 | 3.879   | 1.372 | 2.827  | 1.12E-02 |
| IGLJ3       | 587.341  | 188.256 | 3.120  | 5.92E-03 | 0.665  | 2.604 | 0.255  | 8.01E-01 | -12.427 | 4.399 | -2.825 | 1.12E-02 |
| MIR5695     | 425.289  | 154.984 | 2.744  | 1.33E-02 | 3.790  | 2.144 | 1.768  | 9.40E-02 | -10.224 | 3.621 | -2.823 | 1.13E-02 |
| MMP24.AS1.  | -17.811  | 7.108   | -2.506 | 2.20E-02 | -0.397 | 0.098 | -4.034 | 7.78E-04 | 0.468   | 0.166 | 2.817  | 1.14E-02 |
| UBOX5.AS1   | 145.472  | 45.985  | 3.163  | 5.38E-03 | -0.057 | 0.636 | -0.090 | 9.29E-01 | -3.026  | 1.074 | -2.816 | 1.14E-02 |
| LINC01494   | 199.168  | 68.620  | 2.902  | 9.49E-03 | 0.575  | 0.949 | 0.606  | 5.52E-01 | -4.515  | 1.603 | -2.816 | 1.14E-02 |
| LOC10537495 | 254.385  | 82.228  | 3.094  | 6.27E-03 | 0.320  | 1.137 | 0.281  | 7.82E-01 | -5.408  | 1.921 | -2.815 | 1.15E-02 |
| OR14J1_5    | 19.231   | 6.204   | 3.100  | 6.18E-03 | 0.015  | 0.086 | 0.179  | 8.60E-01 | -0.408  | 0.145 | -2.815 | 1.15E-02 |
| KIAA0100    | 88.223   | 33.330  | 2.647  | 1.64E-02 | 1.004  | 0.461 | 2.178  | 4.29E-02 | -2.189  | 0.779 | -2.811 | 1.16E-02 |
| LINC01730   | -161.823 | 56.541  | -2.862 | 1.04E-02 | -0.781 | 0.782 | -0.998 | 3.31E-01 | 3.711   | 1.321 | 2.809  | 1.16E-02 |
| KRTAP6.3    | 207.278  | 69.190  | 2.996  | 7.76E-03 | 0.503  | 0.957 | 0.525  | 6.06E-01 | -4.535  | 1.617 | -2.805 | 1.17E-02 |
| HNRNPCL3    | 9.004    | 2.852   | 3.157  | 5.45E-03 | 0.000  | 0.039 | 0.000  | 1.00E+00 | -0.187  | 0.067 | -2.803 | 1.18E-02 |
| PGAM1P5     | 72.600   | 26.053  | 2.787  | 1.22E-02 | 0.453  | 0.360 | 1.257  | 2.25E-01 | -1.706  | 0.609 | -2.803 | 1.18E-02 |
| PRSS1       | 40.167   | 13.196  | 3.044  | 6.98E-03 | 0.074  | 0.183 | 0.405  | 6.90E-01 | -0.863  | 0.308 | -2.799 | 1.19E-02 |
| ZCCHC18     | 52.537   | 17.488  | 3.004  | 7.62E-03 | 0.194  | 0.242 | 0.802  | 4.33E-01 | -1.141  | 0.409 | -2.793 | 1.20E-02 |
| GMCL1       | 157.193  | 53.899  | 2.916  | 9.21E-03 | 0.687  | 0.746 | 0.922  | 3.69E-01 | -3.515  | 1.259 | -2.791 | 1.21E-02 |
| PITPNM1     | 102.321  | 37.389  | 2.737  | 1.36E-02 | 0.690  | 0.517 | 1.335  | 1.99E-01 | -2.438  | 0.874 | -2.791 | 1.21E-02 |
| LOC10012877 | -80.652  | 30.007  | -2.688 | 1.50E-02 | -0.758 | 0.415 | -1.827 | 8.44E-02 | 1.956   | 0.701 | 2.790  | 1.21E-02 |
| SLX1A.SULT1 | 10.479   | 3.624   | 2.891  | 9.72E-03 | 0.054  | 0.050 | 1.074  | 2.97E-01 | -0.236  | 0.085 | -2.788 | 1.21E-02 |
| LOC10798394 | -92.154  | 38.217  | -2.411 | 2.68E-02 | -2.284 | 0.529 | -4.321 | 4.12E-04 | 2.489   | 0.893 | 2.788  | 1.22E-02 |
| SPEF2       | 77.346   | 22.693  | 3.408  | 3.13E-03 | -0.463 | 0.314 | -1.476 | 1.57E-01 | -1.477  | 0.530 | -2.786 | 1.22E-02 |
| LOC10537295 | 134.126  | 43.012  | 3.118  | 5.94E-03 | 0.034  | 0.595 | 0.057  | 9.55E-01 | -2.799  | 1.005 | -2.785 | 1.22E-02 |
| LOC10798536 | -256.550 | 90.917  | -2.822 | 1.13E-02 | -1.005 | 1.258 | -0.799 | 4.35E-01 | 5.903   | 2.124 | 2.779  | 1.24E-02 |
| KIF2B       | 101.324  | 35.595  | 2.847  | 1.07E-02 | 0.389  | 0.492 | 0.789  | 4.40E-01 | -2.308  | 0.832 | -2.775 | 1.25E-02 |
| LOC10798495 | 123.629  | 39.088  | 3.163  | 5.38E-03 | -0.238 | 0.541 | -0.439 | 6.66E-01 | -2.530  | 0.913 | -2.770 | 1.26E-02 |
| LOC10798578 | 58.166   | 19.739  | 2.947  | 8.63E-03 | -0.035 | 0.273 | -0.130 | 8.98E-01 | -1.276  | 0.461 | -2.767 | 1.27E-02 |
| MIR4314     | -182.257 | 78.032  | -2.336 | 3.13E-02 | -5.020 | 1.079 | -4.651 | 1.99E-04 | 5.020   | 1.823 | 2.753  | 1.31E-02 |
| MIR3927     | -118.082 | 50.556  | -2.336 | 3.13E-02 | -3.252 | 0.699 | -4.651 | 1.99E-04 | 3.252   | 1.181 | 2.753  | 1.31E-02 |
| EFCAB12     | 82.890   | 29.410  | 2.818  | 1.14E-02 | 0.570  | 0.407 | 1.401  | 1.78E-01 | -1.892  | 0.687 | -2.753 | 1.31E-02 |

|             |          |         |        |          |        |       |        |          |         |       |        |          |
|-------------|----------|---------|--------|----------|--------|-------|--------|----------|---------|-------|--------|----------|
| IGHEP1_1    | 15.736   | 5.181   | 3.037  | 7.09E-03 | 0.017  | 0.072 | 0.232  | 8.19E-01 | -0.333  | 0.121 | -2.752 | 1.31E-02 |
| SNORD121A   | 194.124  | 62.043  | 3.129  | 5.80E-03 | -0.250 | 0.858 | -0.292 | 7.74E-01 | -3.982  | 1.450 | -2.747 | 1.32E-02 |
| RARA.AS1    | -17.326  | 7.607   | -2.278 | 3.52E-02 | -0.533 | 0.105 | -5.066 | 8.04E-05 | 0.488   | 0.178 | 2.745  | 1.33E-02 |
| LINC00578   | -217.553 | 79.090  | -2.751 | 1.32E-02 | -1.085 | 1.094 | -0.992 | 3.34E-01 | 5.064   | 1.848 | 2.740  | 1.34E-02 |
| LOC1027238  | 34.967   | 12.331  | 2.836  | 1.10E-02 | 0.199  | 0.171 | 1.168  | 2.58E-01 | -0.789  | 0.288 | -2.740 | 1.35E-02 |
| LOC1053786  | 257.803  | 84.858  | 3.038  | 7.07E-03 | 0.166  | 1.174 | 0.142  | 8.89E-01 | -5.429  | 1.983 | -2.738 | 1.35E-02 |
| LOC1079842  | -68.146  | 26.626  | -2.559 | 1.97E-02 | -0.959 | 0.368 | -2.604 | 1.79E-02 | 1.703   | 0.622 | 2.738  | 1.35E-02 |
| GGCT        | 133.934  | 40.717  | 3.289  | 4.08E-03 | -0.559 | 0.563 | -0.992 | 3.34E-01 | -2.604  | 0.951 | -2.737 | 1.35E-02 |
| LOC1053743  | -106.481 | 44.292  | -2.404 | 2.72E-02 | -2.360 | 0.613 | -3.852 | 1.17E-03 | 2.832   | 1.035 | 2.736  | 1.36E-02 |
| GSE1        | 36.647   | 15.226  | 2.407  | 2.70E-02 | 0.468  | 0.211 | 2.224  | 3.92E-02 | -0.973  | 0.356 | -2.735 | 1.36E-02 |
| SLC25A32    | 81.276   | 29.620  | 2.744  | 1.33E-02 | 0.366  | 0.410 | 0.894  | 3.83E-01 | -1.892  | 0.692 | -2.734 | 1.36E-02 |
| SYNC        | 32.507   | 12.904  | 2.519  | 2.14E-02 | 0.355  | 0.178 | 1.991  | 6.19E-02 | -0.823  | 0.302 | -2.731 | 1.37E-02 |
| LL22NC01.81 | 95.289   | 33.195  | 2.871  | 1.02E-02 | 0.209  | 0.459 | 0.456  | 6.54E-01 | -2.112  | 0.776 | -2.723 | 1.39E-02 |
| LOC1079851  | 125.104  | 48.091  | 2.601  | 1.80E-02 | 0.886  | 0.665 | 1.332  | 2.00E-01 | -3.058  | 1.124 | -2.722 | 1.40E-02 |
| MIR193B     | 536.016  | 169.857 | 3.156  | 5.47E-03 | -1.175 | 2.349 | -0.500 | 6.23E-01 | -10.799 | 3.969 | -2.721 | 1.40E-02 |
| LOC1053761  | -104.997 | 46.925  | -2.238 | 3.81E-02 | -3.068 | 0.649 | -4.727 | 1.68E-04 | 2.983   | 1.096 | 2.720  | 1.40E-02 |
| RBMX2       | 102.127  | 34.072  | 2.997  | 7.73E-03 | -0.121 | 0.471 | -0.257 | 8.00E-01 | -2.163  | 0.796 | -2.717 | 1.41E-02 |
| CACNG6      | 102.944  | 38.173  | 2.697  | 1.48E-02 | 0.669  | 0.528 | 1.267  | 2.21E-01 | -2.418  | 0.892 | -2.711 | 1.43E-02 |
| FAM197Y9    | 198.304  | 62.685  | 3.163  | 5.38E-03 | -0.575 | 0.867 | -0.663 | 5.16E-01 | -3.969  | 1.465 | -2.710 | 1.43E-02 |
| LOC1053754  | 146.640  | 55.034  | 2.665  | 1.58E-02 | 0.837  | 0.761 | 1.099  | 2.86E-01 | -3.484  | 1.286 | -2.709 | 1.44E-02 |
| LINC02039   | 198.110  | 64.660  | 3.064  | 6.69E-03 | -0.424 | 0.894 | -0.474 | 6.42E-01 | -4.092  | 1.511 | -2.708 | 1.44E-02 |
| LOC1053784  | -93.636  | 34.575  | -2.708 | 1.44E-02 | -0.623 | 0.478 | -1.303 | 2.09E-01 | 2.186   | 0.808 | 2.706  | 1.45E-02 |
| LOC1053724  | -3.206   | 1.290   | -2.485 | 2.30E-02 | -0.062 | 0.018 | -3.471 | 2.72E-03 | 0.082   | 0.030 | 2.704  | 1.45E-02 |
| HPF1        | 181.622  | 67.212  | 2.702  | 1.46E-02 | 0.988  | 0.930 | 1.063  | 3.02E-01 | -4.244  | 1.570 | -2.703 | 1.46E-02 |
| HLA.C_3     | 60.026   | 20.557  | 2.920  | 9.14E-03 | 0.141  | 0.284 | 0.495  | 6.27E-01 | -1.297  | 0.480 | -2.700 | 1.46E-02 |
| BIN1        | 106.194  | 36.010  | 2.949  | 8.58E-03 | 0.059  | 0.498 | 0.119  | 9.07E-01 | -2.270  | 0.841 | -2.698 | 1.47E-02 |
| TCL1B       | 129.867  | 45.598  | 2.848  | 1.07E-02 | 0.249  | 0.631 | 0.395  | 6.98E-01 | -2.872  | 1.065 | -2.696 | 1.48E-02 |
| MIR5692A1   | 831.467  | 323.075 | 2.574  | 1.91E-02 | 9.232  | 4.469 | 2.066  | 5.35E-02 | -20.339 | 7.549 | -2.694 | 1.48E-02 |
| DENND3      | 44.495   | 17.017  | 2.615  | 1.75E-02 | 0.240  | 0.235 | 1.018  | 3.22E-01 | -1.070  | 0.398 | -2.692 | 1.49E-02 |
| LINC02027   | 329.984  | 116.153 | 2.841  | 1.08E-02 | 1.406  | 1.607 | 0.875  | 3.93E-01 | -7.305  | 2.714 | -2.692 | 1.49E-02 |
| LINC01058   | -181.588 | 73.167  | -2.482 | 2.32E-02 | -3.331 | 1.012 | -3.292 | 4.05E-03 | 4.600   | 1.710 | 2.691  | 1.49E-02 |
| MIR3149     | 299.450  | 98.966  | 3.026  | 7.27E-03 | 0.000  | 1.369 | 0.000  | 1.00E+00 | -6.217  | 2.312 | -2.689 | 1.50E-02 |
| ABHD13      | 86.385   | 29.695  | 2.909  | 9.36E-03 | 0.134  | 0.411 | 0.327  | 7.47E-01 | -1.865  | 0.694 | -2.688 | 1.50E-02 |
| TAF9B       | 114.209  | 41.950  | 2.722  | 1.40E-02 | 0.654  | 0.580 | 1.126  | 2.75E-01 | -2.635  | 0.980 | -2.688 | 1.50E-02 |
| LOC1027248  | 801.501  | 265.929 | 3.014  | 7.46E-03 | 0.060  | 3.678 | 0.016  | 9.87E-01 | -16.675 | 6.213 | -2.684 | 1.52E-02 |
| BAIAP3      | 52.341   | 20.434  | 2.561  | 1.96E-02 | 0.402  | 0.283 | 1.421  | 1.73E-01 | -1.280  | 0.477 | -2.680 | 1.53E-02 |
| LOC1122683  | -8.864   | 3.709   | -2.390 | 2.80E-02 | -0.187 | 0.051 | -3.642 | 1.86E-03 | 0.232   | 0.087 | 2.678  | 1.53E-02 |
| LINC00337   | 122.933  | 40.781  | 3.014  | 7.45E-03 | 0.013  | 0.564 | 0.023  | 9.82E-01 | -2.550  | 0.953 | -2.676 | 1.54E-02 |
| IGLV10.67   | 94.005   | 35.929  | 2.616  | 1.75E-02 | 0.767  | 0.497 | 1.544  | 1.40E-01 | -2.246  | 0.839 | -2.675 | 1.54E-02 |
| BARX2       | -138.794 | 53.645  | -2.587 | 1.86E-02 | -0.984 | 0.742 | -1.326 | 2.02E-01 | 3.350   | 1.253 | 2.673  | 1.55E-02 |
| LOC1019296  | -22.898  | 8.679   | -2.639 | 1.67E-02 | -0.065 | 0.120 | -0.540 | 5.96E-01 | 0.542   | 0.203 | 2.672  | 1.55E-02 |
| CPEB1.AS1   | 67.541   | 23.373  | 2.890  | 9.76E-03 | 0.063  | 0.323 | 0.195  | 8.47E-01 | -1.459  | 0.546 | -2.671 | 1.56E-02 |
| LOC1079846  | 150.146  | 52.302  | 2.871  | 1.02E-02 | 0.274  | 0.723 | 0.378  | 7.10E-01 | -3.262  | 1.222 | -2.670 | 1.56E-02 |
| LOC1079842  | 108.869  | 38.380  | 2.837  | 1.09E-02 | 0.385  | 0.531 | 0.726  | 4.77E-01 | -2.394  | 0.897 | -2.669 | 1.56E-02 |
| RDH8        | 95.432   | 33.845  | 2.820  | 1.13E-02 | 0.252  | 0.468 | 0.538  | 5.97E-01 | -2.110  | 0.791 | -2.669 | 1.57E-02 |
| MIR5197     | 664.716  | 221.386 | 3.003  | 7.64E-03 | -0.296 | 3.062 | -0.097 | 9.24E-01 | -13.802 | 5.173 | -2.668 | 1.57E-02 |
| ABCA12      | 103.761  | 38.308  | 2.709  | 1.44E-02 | 0.349  | 0.530 | 0.658  | 5.19E-01 | -2.387  | 0.895 | -2.667 | 1.57E-02 |
| LINC01978   | 61.970   | 21.503  | 2.882  | 9.93E-03 | 0.048  | 0.297 | 0.162  | 8.73E-01 | -1.339  | 0.502 | -2.666 | 1.58E-02 |
| LINC02624   | -168.876 | 62.891  | -2.685 | 1.51E-02 | -0.867 | 0.870 | -0.997 | 3.32E-01 | 3.916   | 1.469 | 2.665  | 1.58E-02 |
| LOC1053727  | 120.052  | 42.417  | 2.830  | 1.11E-02 | 0.212  | 0.587 | 0.362  | 7.22E-01 | -2.640  | 0.991 | -2.663 | 1.58E-02 |
| NECTIN3.AS1 | -381.438 | 142.560 | -2.676 | 1.54E-02 | -0.609 | 1.972 | -0.309 | 7.61E-01 | 8.869   | 3.331 | 2.663  | 1.59E-02 |
| MIR1197     | -68.246  | 32.013  | -2.132 | 4.71E-02 | -2.342 | 0.443 | -5.290 | 4.98E-05 | 1.991   | 0.748 | 2.662  | 1.59E-02 |
| ZNF345      | -167.542 | 63.295  | -2.647 | 1.64E-02 | -0.539 | 0.875 | -0.615 | 5.46E-01 | 3.933   | 1.479 | 2.660  | 1.60E-02 |

|             |          |         |        |          |        |       |        |          |         |        |        |          |
|-------------|----------|---------|--------|----------|--------|-------|--------|----------|---------|--------|--------|----------|
| LINC01151   | -611.461 | 224.014 | -2.730 | 1.38E-02 | -2.448 | 3.099 | -0.790 | 4.40E-01 | 13.921  | 5.234  | 2.660  | 1.60E-02 |
| LOC10192735 | -408.392 | 149.589 | -2.730 | 1.37E-02 | -1.006 | 2.069 | -0.486 | 6.33E-01 | 9.278   | 3.495  | 2.655  | 1.61E-02 |
| AKIRIN1     | 113.126  | 36.335  | 3.113  | 6.00E-03 | -0.423 | 0.503 | -0.841 | 4.11E-01 | -2.253  | 0.849  | -2.654 | 1.61E-02 |
| TARM1       | 22.956   | 7.766   | 2.956  | 8.45E-03 | 0.004  | 0.107 | 0.033  | 9.74E-01 | -0.481  | 0.181  | -2.654 | 1.62E-02 |
| MIR4477B    | 2136.573 | 707.261 | 3.021  | 7.34E-03 | -3.353 | 9.783 | -0.343 | 7.36E-01 | -43.804 | 16.525 | -2.651 | 1.63E-02 |
| TCF21       | 66.392   | 22.338  | 2.972  | 8.16E-03 | -0.003 | 0.309 | -0.011 | 9.92E-01 | -1.383  | 0.522  | -2.650 | 1.63E-02 |
| BCDIN3D.AS1 | 85.651   | 30.317  | 2.825  | 1.12E-02 | 0.253  | 0.419 | 0.604  | 5.53E-01 | -1.877  | 0.708  | -2.650 | 1.63E-02 |
| S100A10     | 105.600  | 35.210  | 2.999  | 7.70E-03 | -0.163 | 0.487 | -0.335 | 7.41E-01 | -2.179  | 0.823  | -2.649 | 1.63E-02 |
| DDX27       | 118.348  | 44.786  | 2.642  | 1.65E-02 | 0.586  | 0.619 | 0.947  | 3.56E-01 | -2.771  | 1.046  | -2.648 | 1.64E-02 |
| ZNF806      | 81.444   | 27.545  | 2.957  | 8.44E-03 | -0.088 | 0.381 | -0.231 | 8.20E-01 | -1.703  | 0.644  | -2.646 | 1.64E-02 |
| TMEM265     | 163.141  | 59.575  | 2.738  | 1.35E-02 | 0.882  | 0.824 | 1.070  | 2.99E-01 | -3.681  | 1.392  | -2.644 | 1.65E-02 |
| LOC1053701  | -729.944 | 264.199 | -2.763 | 1.28E-02 | 0.414  | 3.654 | 0.113  | 9.11E-01 | 16.322  | 6.173  | 2.644  | 1.65E-02 |
| IP6K3       | 61.419   | 20.603  | 2.981  | 8.01E-03 | -0.007 | 0.285 | -0.024 | 9.81E-01 | -1.272  | 0.481  | -2.642 | 1.65E-02 |
| SCTR.AS1    | -135.519 | 50.661  | -2.675 | 1.54E-02 | -0.669 | 0.701 | -0.955 | 3.52E-01 | 3.124   | 1.184  | 2.639  | 1.67E-02 |
| FLT3        | 85.235   | 34.055  | 2.503  | 2.22E-02 | 0.438  | 0.471 | 0.930  | 3.65E-01 | -2.098  | 0.796  | -2.637 | 1.68E-02 |
| BTN2A1      | 84.328   | 32.902  | 2.563  | 1.96E-02 | 0.549  | 0.455 | 1.206  | 2.44E-01 | -2.027  | 0.769  | -2.636 | 1.68E-02 |
| OR5F1       | -371.104 | 136.424 | -2.720 | 1.40E-02 | -0.689 | 1.887 | -0.365 | 7.19E-01 | 8.399   | 3.187  | 2.635  | 1.68E-02 |
| TRBV11.1_1  | -28.305  | 12.671  | -2.234 | 3.84E-02 | -0.780 | 0.175 | -4.449 | 3.10E-04 | 0.780   | 0.296  | 2.634  | 1.69E-02 |
| LOC10050685 | -84.138  | 40.510  | -2.077 | 5.24E-02 | -3.169 | 0.560 | -5.656 | 2.30E-05 | 2.492   | 0.946  | 2.632  | 1.69E-02 |
| MIR4297     | 235.654  | 79.644  | 2.959  | 8.40E-03 | -0.172 | 1.102 | -0.156 | 8.78E-01 | -4.896  | 1.861  | -2.631 | 1.69E-02 |
| SNORA66     | 307.048  | 101.439 | 3.027  | 7.25E-03 | -0.543 | 1.403 | -0.387 | 7.03E-01 | -6.233  | 2.370  | -2.630 | 1.70E-02 |
| LOC11226825 | 414.369  | 136.438 | 3.037  | 7.09E-03 | -0.180 | 1.887 | -0.095 | 9.25E-01 | -8.383  | 3.188  | -2.630 | 1.70E-02 |
| TTLL10.AS1  | 61.120   | 24.415  | 2.503  | 2.22E-02 | 0.513  | 0.338 | 1.518  | 1.46E-01 | -1.499  | 0.570  | -2.627 | 1.71E-02 |
| KRTAP9.4_1  | -26.563  | 11.842  | -2.243 | 3.77E-02 | -0.823 | 0.164 | -5.022 | 8.85E-05 | 0.727   | 0.277  | 2.627  | 1.71E-02 |
| PRAMEF19    | 133.527  | 53.772  | 2.483  | 2.31E-02 | 1.164  | 0.744 | 1.566  | 1.35E-01 | -3.300  | 1.256  | -2.627 | 1.71E-02 |
| TBCE_1      | 2.928    | 0.982   | 2.981  | 8.01E-03 | -0.003 | 0.014 | -0.195 | 8.48E-01 | -0.060  | 0.023  | -2.626 | 1.71E-02 |
| TMEFF2      | 69.428   | 23.729  | 2.926  | 9.03E-03 | -0.183 | 0.328 | -0.556 | 5.85E-01 | -1.455  | 0.554  | -2.624 | 1.72E-02 |
| LOC10798735 | 174.142  | 59.340  | 2.935  | 8.86E-03 | 0.052  | 0.821 | 0.063  | 9.50E-01 | -3.638  | 1.386  | -2.624 | 1.72E-02 |
| MIR30E      | -134.322 | 62.341  | -2.155 | 4.50E-02 | -4.157 | 0.862 | -4.821 | 1.37E-04 | 3.821   | 1.457  | 2.624  | 1.72E-02 |
| LINC01894   | 95.160   | 36.568  | 2.602  | 1.80E-02 | 0.522  | 0.506 | 1.033  | 3.15E-01 | -2.240  | 0.854  | -2.622 | 1.73E-02 |
| ERCC4       | 81.933   | 27.625  | 2.966  | 8.28E-03 | -0.144 | 0.382 | -0.377 | 7.10E-01 | -1.689  | 0.645  | -2.617 | 1.75E-02 |
| BTN1A1      | 139.363  | 47.288  | 2.947  | 8.62E-03 | 0.011  | 0.654 | 0.016  | 9.87E-01 | -2.888  | 1.105  | -2.614 | 1.76E-02 |
| LOC10537843 | 78.573   | 28.515  | 2.756  | 1.30E-02 | 0.274  | 0.394 | 0.694  | 4.97E-01 | -1.741  | 0.666  | -2.613 | 1.76E-02 |
| LOC10537195 | 78.004   | 26.509  | 2.943  | 8.71E-03 | 0.012  | 0.367 | 0.033  | 9.74E-01 | -1.618  | 0.619  | -2.613 | 1.76E-02 |
| LOC10798735 | 175.426  | 70.220  | 2.498  | 2.24E-02 | 1.601  | 0.971 | 1.648  | 1.17E-01 | -4.278  | 1.641  | -2.608 | 1.78E-02 |
| SNORD46     | 427.836  | 145.688 | 2.937  | 8.82E-03 | -0.320 | 2.015 | -0.159 | 8.76E-01 | -8.876  | 3.404  | -2.608 | 1.78E-02 |
| SNORD63     | 536.976  | 183.278 | 2.930  | 8.95E-03 | 0.000  | 2.535 | 0.000  | 1.00E+00 | -11.155 | 4.282  | -2.605 | 1.79E-02 |
| OR2J3       | 15.365   | 5.343   | 2.876  | 1.01E-02 | 0.004  | 0.074 | 0.052  | 9.59E-01 | -0.325  | 0.125  | -2.603 | 1.80E-02 |
| MIR181A1    | 274.909  | 113.942 | 2.413  | 2.67E-02 | 3.426  | 1.576 | 2.174  | 4.33E-02 | -6.928  | 2.662  | -2.602 | 1.80E-02 |
| ERP29       | 74.537   | 30.160  | 2.471  | 2.37E-02 | 0.702  | 0.417 | 1.682  | 1.10E-01 | -1.834  | 0.705  | -2.602 | 1.80E-02 |
| LOC10798635 | -63.901  | 23.471  | -2.723 | 1.40E-02 | 0.002  | 0.325 | 0.006  | 9.96E-01 | 1.426   | 0.548  | 2.601  | 1.81E-02 |
| VPS52_5     | -2.897   | 1.235   | -2.345 | 3.07E-02 | -0.075 | 0.017 | -4.391 | 3.52E-04 | 0.075   | 0.029  | 2.599  | 1.81E-02 |
| LOC10537012 | -436.379 | 163.560 | -2.668 | 1.57E-02 | 0.026  | 2.262 | 0.012  | 9.91E-01 | 9.930   | 3.822  | 2.598  | 1.82E-02 |
| XRCC5       | -303.019 | 110.729 | -2.737 | 1.36E-02 | 0.055  | 1.532 | 0.036  | 9.72E-01 | 6.720   | 2.587  | 2.598  | 1.82E-02 |
| DNAH3       | -72.017  | 25.704  | -2.802 | 1.18E-02 | 0.054  | 0.356 | 0.153  | 8.80E-01 | 1.560   | 0.601  | 2.597  | 1.82E-02 |
| LOC10798654 | -364.533 | 145.196 | -2.511 | 2.18E-02 | -2.533 | 2.008 | -1.261 | 2.23E-01 | 8.810   | 3.392  | 2.597  | 1.82E-02 |
| LOC10537665 | -99.328  | 37.956  | -2.617 | 1.75E-02 | -0.455 | 0.525 | -0.866 | 3.98E-01 | 2.301   | 0.887  | 2.594  | 1.83E-02 |
| ABI1        | 78.301   | 28.510  | 2.746  | 1.33E-02 | 0.123  | 0.394 | 0.311  | 7.60E-01 | -1.728  | 0.666  | -2.594 | 1.83E-02 |
| TMEM183B    | -103.559 | 40.171  | -2.578 | 1.90E-02 | -0.689 | 0.556 | -1.240 | 2.31E-01 | 2.434   | 0.939  | 2.594  | 1.83E-02 |
| LOC10537955 | -27.536  | 11.526  | -2.389 | 2.81E-02 | -0.427 | 0.159 | -2.676 | 1.54E-02 | 0.698   | 0.269  | 2.593  | 1.84E-02 |
| TRA.CGC5.1  | -213.401 | 89.330  | -2.389 | 2.81E-02 | -3.307 | 1.236 | -2.676 | 1.54E-02 | 5.411   | 2.087  | 2.593  | 1.84E-02 |
| MIR4268     | 1174.850 | 420.305 | 2.795  | 1.20E-02 | 2.717  | 5.814 | 0.467  | 6.46E-01 | -25.457 | 9.820  | -2.592 | 1.84E-02 |
| LOC11226825 | 68.776   | 25.188  | 2.731  | 1.37E-02 | 0.083  | 0.348 | 0.237  | 8.15E-01 | -1.525  | 0.589  | -2.592 | 1.84E-02 |

|             |          |         |        |          |        |       |        |          |         |       |        |          |
|-------------|----------|---------|--------|----------|--------|-------|--------|----------|---------|-------|--------|----------|
| IL18RAP     | 74.543   | 28.105  | 2.652  | 1.62E-02 | 0.227  | 0.389 | 0.584  | 5.67E-01 | -1.701  | 0.657 | -2.591 | 1.85E-02 |
| PTPMT1      | 66.408   | 25.908  | 2.563  | 1.96E-02 | 0.585  | 0.358 | 1.632  | 1.20E-01 | -1.568  | 0.605 | -2.590 | 1.85E-02 |
| LOC10537068 | -577.942 | 212.350 | -2.722 | 1.40E-02 | 0.136  | 2.937 | 0.046  | 9.64E-01 | 12.843  | 4.961 | 2.588  | 1.85E-02 |
| RDH12       | -110.696 | 44.534  | -2.486 | 2.30E-02 | -1.057 | 0.616 | -1.715 | 1.03E-01 | 2.693   | 1.041 | 2.588  | 1.86E-02 |
| TRV.CAC1.5  | 639.414  | 255.109 | 2.506  | 2.20E-02 | 6.137  | 3.529 | 1.739  | 9.91E-02 | -15.421 | 5.961 | -2.587 | 1.86E-02 |
| LOC10537544 | -206.648 | 79.452  | -2.601 | 1.81E-02 | -0.330 | 1.099 | -0.301 | 7.67E-01 | 4.802   | 1.856 | 2.587  | 1.86E-02 |
| ULK4P1      | -33.119  | 14.576  | -2.272 | 3.56E-02 | -0.757 | 0.202 | -3.753 | 1.46E-03 | 0.880   | 0.341 | 2.585  | 1.87E-02 |
| LOC10537866 | 127.622  | 46.526  | 2.743  | 1.34E-02 | 0.365  | 0.644 | 0.568  | 5.77E-01 | -2.809  | 1.087 | -2.584 | 1.87E-02 |
| DHDH        | 71.852   | 29.546  | 2.432  | 2.57E-02 | 0.606  | 0.409 | 1.482  | 1.56E-01 | -1.784  | 0.690 | -2.584 | 1.87E-02 |
| CCP110      | 70.488   | 26.603  | 2.650  | 1.63E-02 | 0.155  | 0.368 | 0.420  | 6.79E-01 | -1.606  | 0.622 | -2.583 | 1.87E-02 |
| MGAT5       | 72.945   | 30.327  | 2.405  | 2.71E-02 | 0.530  | 0.419 | 1.263  | 2.23E-01 | -1.830  | 0.709 | -2.583 | 1.88E-02 |
| POP1        | -239.103 | 92.267  | -2.591 | 1.84E-02 | -0.407 | 1.276 | -0.319 | 7.54E-01 | 5.566   | 2.156 | 2.582  | 1.88E-02 |
| LOC10537399 | -107.658 | 41.056  | -2.622 | 1.73E-02 | -0.317 | 0.568 | -0.559 | 5.83E-01 | 2.474   | 0.959 | 2.579  | 1.89E-02 |
| C13orf46_1  | 14.867   | 5.092   | 2.920  | 9.15E-03 | -0.009 | 0.070 | -0.122 | 9.04E-01 | -0.307  | 0.119 | -2.578 | 1.90E-02 |
| LOC10537189 | -18.582  | 8.720   | -2.131 | 4.71E-02 | -0.568 | 0.121 | -4.712 | 1.74E-04 | 0.525   | 0.204 | 2.577  | 1.90E-02 |
| MIR4780     | 737.243  | 250.216 | 2.946  | 8.63E-03 | -0.041 | 3.461 | -0.012 | 9.91E-01 | -15.060 | 5.846 | -2.576 | 1.90E-02 |
| OR4K1       | 471.450  | 164.080 | 2.873  | 1.01E-02 | -0.703 | 2.270 | -0.310 | 7.60E-01 | -9.874  | 3.834 | -2.576 | 1.90E-02 |
| LOC10272508 | -122.024 | 57.063  | -2.138 | 4.64E-02 | -3.277 | 0.789 | -4.152 | 5.99E-04 | 3.433   | 1.333 | 2.575  | 1.91E-02 |
| LOC10192871 | 33.396   | 13.083  | 2.553  | 2.00E-02 | 0.280  | 0.181 | 1.545  | 1.40E-01 | -0.787  | 0.306 | -2.575 | 1.91E-02 |
| LOC10272401 | -641.717 | 245.444 | -2.615 | 1.76E-02 | -0.622 | 3.395 | -0.183 | 8.57E-01 | 14.762  | 5.735 | 2.574  | 1.91E-02 |
| ZDHH13      | -177.682 | 70.797  | -2.510 | 2.19E-02 | -1.565 | 0.979 | -1.599 | 1.27E-01 | 4.256   | 1.654 | 2.573  | 1.92E-02 |
| MIR378E     | -310.254 | 131.188 | -2.365 | 2.95E-02 | -4.430 | 1.815 | -2.441 | 2.52E-02 | 7.886   | 3.065 | 2.573  | 1.92E-02 |
| LOC10537358 | -51.138  | 23.379  | -2.187 | 4.22E-02 | -1.577 | 0.323 | -4.876 | 1.21E-04 | 1.405   | 0.546 | 2.572  | 1.92E-02 |
| TRUB2       | 69.978   | 24.051  | 2.910  | 9.35E-03 | -0.038 | 0.333 | -0.115 | 9.10E-01 | -1.444  | 0.562 | -2.570 | 1.93E-02 |
| LINC02644   | 178.229  | 64.266  | 2.773  | 1.25E-02 | 0.350  | 0.889 | 0.394  | 6.98E-01 | -3.859  | 1.502 | -2.570 | 1.93E-02 |
| LOC10537063 | -98.050  | 40.174  | -2.441 | 2.52E-02 | -1.413 | 0.556 | -2.542 | 2.04E-02 | 2.411   | 0.939 | 2.569  | 1.93E-02 |
| LOC10798519 | -48.225  | 23.553  | -2.048 | 5.55E-02 | -1.639 | 0.326 | -5.032 | 8.67E-05 | 1.413   | 0.550 | 2.567  | 1.94E-02 |
| LOC10798563 | 99.239   | 34.838  | 2.849  | 1.07E-02 | -0.037 | 0.482 | -0.076 | 9.40E-01 | -2.090  | 0.814 | -2.567 | 1.94E-02 |
| EPM2AIP1    | 49.248   | 19.967  | 2.466  | 2.39E-02 | 0.280  | 0.276 | 1.013  | 3.24E-01 | -1.198  | 0.467 | -2.567 | 1.94E-02 |
| PRPF40A     | 67.452   | 26.585  | 2.537  | 2.06E-02 | 0.308  | 0.368 | 0.838  | 4.13E-01 | -1.594  | 0.621 | -2.566 | 1.94E-02 |
| TMEM158     | 62.526   | 22.442  | 2.786  | 1.22E-02 | 0.022  | 0.310 | 0.071  | 9.44E-01 | -1.345  | 0.524 | -2.566 | 1.95E-02 |
| LOC10537653 | -349.806 | 135.472 | -2.582 | 1.88E-02 | -0.838 | 1.874 | -0.447 | 6.60E-01 | 8.119   | 3.165 | 2.565  | 1.95E-02 |
| AVIL        | 75.659   | 25.704  | 2.943  | 8.69E-03 | -0.137 | 0.356 | -0.387 | 7.04E-01 | -1.540  | 0.601 | -2.564 | 1.95E-02 |
| ROR1        | -112.646 | 42.863  | -2.628 | 1.71E-02 | -0.294 | 0.593 | -0.496 | 6.26E-01 | 2.566   | 1.001 | 2.562  | 1.96E-02 |
| TRAJ26      | -127.870 | 62.988  | -2.030 | 5.74E-02 | -4.271 | 0.871 | -4.902 | 1.15E-04 | 3.771   | 1.472 | 2.562  | 1.96E-02 |
| LOC10536951 | 260.481  | 95.155  | 2.737  | 1.35E-02 | 0.701  | 1.316 | 0.532  | 6.01E-01 | -5.693  | 2.223 | -2.561 | 1.96E-02 |
| LOC10537421 | -228.493 | 92.571  | -2.468 | 2.38E-02 | -1.607 | 1.280 | -1.255 | 2.25E-01 | 5.534   | 2.163 | 2.559  | 1.97E-02 |
| ESYT3       | -53.684  | 22.014  | -2.439 | 2.53E-02 | -0.371 | 0.304 | -1.219 | 2.38E-01 | 1.315   | 0.514 | 2.557  | 1.98E-02 |
| KRT75       | -228.351 | 90.158  | -2.533 | 2.08E-02 | -0.773 | 1.247 | -0.620 | 5.43E-01 | 5.385   | 2.107 | 2.556  | 1.98E-02 |
| MARK1       | 85.808   | 33.339  | 2.574  | 1.91E-02 | 0.447  | 0.461 | 0.970  | 3.45E-01 | -1.991  | 0.779 | -2.556 | 1.99E-02 |
| MIR1286     | 547.752  | 226.763 | 2.416  | 2.66E-02 | 6.282  | 3.137 | 2.003  | 6.05E-02 | -13.538 | 5.298 | -2.555 | 1.99E-02 |
| C5AR2       | -80.217  | 32.429  | -2.474 | 2.36E-02 | -0.517 | 0.449 | -1.153 | 2.64E-01 | 1.935   | 0.758 | 2.554  | 1.99E-02 |
| PYDC1       | 210.169  | 84.723  | 2.481  | 2.32E-02 | 1.822  | 1.172 | 1.555  | 1.37E-01 | -5.052  | 1.980 | -2.552 | 2.00E-02 |
| RAB27B      | 66.665   | 25.513  | 2.613  | 1.76E-02 | 0.271  | 0.353 | 0.768  | 4.52E-01 | -1.521  | 0.596 | -2.551 | 2.01E-02 |
| LINC01522   | 115.213  | 38.158  | 3.019  | 7.37E-03 | -0.592 | 0.528 | -1.121 | 2.77E-01 | -2.273  | 0.892 | -2.550 | 2.01E-02 |
| LRRC19      | 113.678  | 40.859  | 2.782  | 1.23E-02 | 0.202  | 0.565 | 0.357  | 7.25E-01 | -2.431  | 0.955 | -2.547 | 2.02E-02 |
| LOC10537311 | -120.383 | 44.562  | -2.701 | 1.46E-02 | -0.148 | 0.616 | -0.240 | 8.13E-01 | 2.650   | 1.041 | 2.545  | 2.03E-02 |
| MIR548AN    | -114.279 | 55.973  | -2.042 | 5.61E-02 | -4.073 | 0.774 | -5.260 | 5.30E-05 | 3.328   | 1.308 | 2.545  | 2.03E-02 |
| LOC10537533 | 18.710   | 7.859   | 2.381  | 2.85E-02 | 0.202  | 0.109 | 1.857  | 7.98E-02 | -0.467  | 0.184 | -2.544 | 2.03E-02 |
| PLA2G1B     | 274.721  | 99.745  | 2.754  | 1.31E-02 | 1.233  | 1.380 | 0.893  | 3.83E-01 | -5.929  | 2.331 | -2.544 | 2.03E-02 |
| RPS18P9     | -200.117 | 76.829  | -2.605 | 1.79E-02 | -1.368 | 1.063 | -1.288 | 2.14E-01 | 4.564   | 1.795 | 2.543  | 2.04E-02 |
| LOC10798591 | 18.548   | 6.601   | 2.810  | 1.16E-02 | -0.002 | 0.091 | -0.027 | 9.79E-01 | -0.392  | 0.154 | -2.543 | 2.04E-02 |
| LRMDA       | 103.956  | 40.346  | 2.577  | 1.90E-02 | 0.422  | 0.558 | 0.756  | 4.60E-01 | -2.395  | 0.943 | -2.541 | 2.05E-02 |

|             |          |         |        |          |        |       |        |          |         |        |        |          |
|-------------|----------|---------|--------|----------|--------|-------|--------|----------|---------|--------|--------|----------|
| LRG1        | 80.936   | 27.098  | 2.987  | 7.91E-03 | -0.293 | 0.375 | -0.782 | 4.44E-01 | -1.608  | 0.633  | -2.540 | 2.05E-02 |
| CDRT15P3_1  | 32.961   | 11.373  | 2.898  | 9.58E-03 | -0.046 | 0.157 | -0.293 | 7.73E-01 | -0.675  | 0.266  | -2.539 | 2.06E-02 |
| LUNAR1      | 124.606  | 41.586  | 2.996  | 7.75E-03 | -0.477 | 0.575 | -0.829 | 4.18E-01 | -2.467  | 0.972  | -2.538 | 2.06E-02 |
| DACT1       | 103.431  | 36.500  | 2.834  | 1.10E-02 | -0.009 | 0.505 | -0.017 | 9.86E-01 | -2.165  | 0.853  | -2.538 | 2.06E-02 |
| LINC00244   | 199.392  | 76.920  | 2.592  | 1.84E-02 | 1.024  | 1.064 | 0.962  | 3.49E-01 | -4.557  | 1.797  | -2.535 | 2.07E-02 |
| TRP.AGG2.6  | 677.788  | 234.816 | 2.886  | 9.83E-03 | 0.000  | 3.248 | 0.000  | 1.00E+00 | -13.908 | 5.486  | -2.535 | 2.07E-02 |
| SNORA50B    | -207.109 | 93.256  | -2.221 | 3.94E-02 | -4.629 | 1.290 | -3.589 | 2.10E-03 | 5.523   | 2.179  | 2.535  | 2.07E-02 |
| MAS1        | 42.435   | 17.150  | 2.474  | 2.35E-02 | 0.081  | 0.237 | 0.340  | 7.37E-01 | -1.015  | 0.401  | -2.533 | 2.08E-02 |
| ANKRD34C    | 82.497   | 34.738  | 2.375  | 2.89E-02 | 0.898  | 0.480 | 1.869  | 7.80E-02 | -2.056  | 0.812  | -2.533 | 2.08E-02 |
| TRAJ46      | 1263.717 | 442.260 | 2.857  | 1.05E-02 | -0.473 | 6.117 | -0.077 | 9.39E-01 | -26.176 | 10.333 | -2.533 | 2.08E-02 |
| NCR3LG1     | -70.081  | 28.157  | -2.489 | 2.28E-02 | -0.558 | 0.389 | -1.432 | 1.69E-01 | 1.666   | 0.658  | 2.533  | 2.08E-02 |
| MIR186      | 1343.274 | 499.433 | 2.690  | 1.50E-02 | 2.949  | 6.908 | 0.427  | 6.75E-01 | -29.548 | 11.669 | -2.532 | 2.09E-02 |
| LINC00545   | 220.260  | 78.067  | 2.821  | 1.13E-02 | 0.060  | 1.080 | 0.056  | 9.56E-01 | -4.618  | 1.824  | -2.532 | 2.09E-02 |
| LOC1079851  | 75.398   | 29.521  | 2.554  | 1.99E-02 | 0.443  | 0.408 | 1.085  | 2.92E-01 | -1.746  | 0.690  | -2.532 | 2.09E-02 |
| MIR3146     | -489.044 | 209.099 | -2.339 | 3.11E-02 | -7.636 | 2.892 | -2.640 | 1.66E-02 | 12.359  | 4.886  | 2.530  | 2.10E-02 |
| LOC10798630 | -80.160  | 32.243  | -2.486 | 2.30E-02 | -0.573 | 0.446 | -1.284 | 2.15E-01 | 1.905   | 0.753  | 2.528  | 2.10E-02 |
| LOC10537610 | 81.311   | 29.503  | 2.756  | 1.30E-02 | 0.014  | 0.408 | 0.035  | 9.73E-01 | -1.743  | 0.689  | -2.528 | 2.10E-02 |
| PRPH2       | -301.953 | 113.514 | -2.660 | 1.59E-02 | 0.309  | 1.570 | 0.197  | 8.46E-01 | 6.701   | 2.652  | 2.527  | 2.11E-02 |
| SREBF2      | -110.907 | 42.914  | -2.584 | 1.87E-02 | -0.411 | 0.594 | -0.692 | 4.98E-01 | 2.532   | 1.003  | 2.526  | 2.11E-02 |
| RPA1        | 116.696  | 44.809  | 2.604  | 1.79E-02 | 0.374  | 0.620 | 0.603  | 5.54E-01 | -2.643  | 1.047  | -2.525 | 2.12E-02 |
| LOC10798530 | 98.292   | 35.923  | 2.736  | 1.36E-02 | 0.201  | 0.497 | 0.404  | 6.91E-01 | -2.114  | 0.839  | -2.518 | 2.15E-02 |
| PROSER3     | -134.469 | 51.928  | -2.590 | 1.85E-02 | -0.215 | 0.718 | -0.299 | 7.68E-01 | 3.054   | 1.213  | 2.517  | 2.15E-02 |
| SCARNA8     | -209.948 | 93.794  | -2.238 | 3.81E-02 | -5.514 | 1.297 | -4.250 | 4.82E-04 | 5.514   | 2.191  | 2.516  | 2.16E-02 |
| HBA1        | 163.502  | 60.577  | 2.699  | 1.47E-02 | 0.365  | 0.838 | 0.435  | 6.68E-01 | -3.560  | 1.415  | -2.515 | 2.16E-02 |
| LOC10798608 | 163.193  | 56.690  | 2.879  | 1.00E-02 | -0.546 | 0.784 | -0.696 | 4.95E-01 | -3.330  | 1.325  | -2.514 | 2.17E-02 |
| LINC02057   | -80.934  | 38.028  | -2.128 | 4.74E-02 | -1.973 | 0.526 | -3.751 | 1.46E-03 | 2.232   | 0.889  | 2.512  | 2.18E-02 |
| RASSF9      | -195.806 | 72.974  | -2.683 | 1.52E-02 | -0.256 | 1.009 | -0.254 | 8.03E-01 | 4.282   | 1.705  | 2.511  | 2.18E-02 |
| LOC10798419 | 82.623   | 35.506  | 2.327  | 3.18E-02 | 0.923  | 0.491 | 1.879  | 7.65E-02 | -2.081  | 0.830  | -2.508 | 2.19E-02 |
| C11orf49    | 57.304   | 24.121  | 2.376  | 2.88E-02 | 0.323  | 0.334 | 0.969  | 3.45E-01 | -1.413  | 0.564  | -2.508 | 2.19E-02 |
| LINC02360   | -452.958 | 175.786 | -2.577 | 1.90E-02 | -0.911 | 2.431 | -0.375 | 7.12E-01 | 10.295  | 4.107  | 2.507  | 2.20E-02 |
| LOC10272393 | 121.336  | 42.809  | 2.834  | 1.10E-02 | -0.090 | 0.592 | -0.152 | 8.81E-01 | -2.507  | 1.000  | -2.507 | 2.20E-02 |
| NDIFP2.AS1  | -34.501  | 17.012  | -2.028 | 5.76E-02 | -1.139 | 0.235 | -4.841 | 1.31E-04 | 0.996   | 0.397  | 2.505  | 2.21E-02 |
| FBXW8       | 70.036   | 27.425  | 2.554  | 1.99E-02 | 0.282  | 0.379 | 0.744  | 4.67E-01 | -1.605  | 0.641  | -2.505 | 2.21E-02 |
| VTRNA1.3    | -77.377  | 35.861  | -2.158 | 4.47E-02 | -2.098 | 0.496 | -4.229 | 5.05E-04 | 2.098   | 0.838  | 2.504  | 2.21E-02 |
| RNF225      | -15.327  | 7.036   | -2.178 | 4.29E-02 | -0.411 | 0.097 | -4.227 | 5.07E-04 | 0.411   | 0.164  | 2.503  | 2.22E-02 |
| LOC10798480 | 160.774  | 55.927  | 2.875  | 1.01E-02 | -0.315 | 0.774 | -0.407 | 6.89E-01 | -3.270  | 1.307  | -2.502 | 2.22E-02 |
| PHRF1_1     | -10.792  | 4.584   | -2.354 | 3.01E-02 | -0.140 | 0.063 | -2.212 | 4.02E-02 | 0.268   | 0.107  | 2.501  | 2.22E-02 |
| ZNF589      | -125.198 | 48.313  | -2.591 | 1.84E-02 | -0.154 | 0.668 | -0.230 | 8.21E-01 | 2.822   | 1.129  | 2.500  | 2.23E-02 |
| SLCO5A1     | -391.336 | 151.377 | -2.585 | 1.87E-02 | 0.189  | 2.094 | 0.090  | 9.29E-01 | 8.839   | 3.537  | 2.499  | 2.24E-02 |
| LOC10537763 | 48.151   | 16.500  | 2.918  | 9.18E-03 | -0.096 | 0.228 | -0.422 | 6.78E-01 | -0.963  | 0.386  | -2.498 | 2.24E-02 |
| SMIM2.AS1   | 101.898  | 38.254  | 2.664  | 1.58E-02 | 0.098  | 0.529 | 0.185  | 8.55E-01 | -2.232  | 0.894  | -2.497 | 2.24E-02 |
| FSD1        | 94.275   | 40.394  | 2.334  | 3.14E-02 | 0.824  | 0.559 | 1.475  | 1.58E-01 | -2.357  | 0.944  | -2.497 | 2.25E-02 |
| LOC10537183 | -123.340 | 55.182  | -2.235 | 3.83E-02 | -2.353 | 0.763 | -3.082 | 6.43E-03 | 3.219   | 1.289  | 2.496  | 2.25E-02 |
| LPL         | -210.313 | 87.737  | -2.397 | 2.76E-02 | -0.666 | 1.214 | -0.549 | 5.90E-01 | 5.115   | 2.050  | 2.495  | 2.25E-02 |
| LOC10798550 | 134.357  | 47.587  | 2.823  | 1.13E-02 | -0.154 | 0.658 | -0.234 | 8.17E-01 | -2.774  | 1.112  | -2.495 | 2.25E-02 |
| LOC10798403 | 125.299  | 51.704  | 2.423  | 2.61E-02 | 1.019  | 0.715 | 1.425  | 1.71E-01 | -3.012  | 1.208  | -2.494 | 2.26E-02 |
| DEFB127     | -110.567 | 53.238  | -2.077 | 5.24E-02 | -2.932 | 0.736 | -3.982 | 8.74E-04 | 3.101   | 1.244  | 2.493  | 2.26E-02 |
| SUCLG2.AS1  | 103.095  | 40.333  | 2.556  | 1.98E-02 | 0.353  | 0.558 | 0.633  | 5.35E-01 | -2.349  | 0.942  | -2.493 | 2.26E-02 |
| C1orf54     | 296.817  | 117.187 | 2.533  | 2.08E-02 | 1.709  | 1.621 | 1.055  | 3.06E-01 | -6.824  | 2.738  | -2.492 | 2.27E-02 |
| FAM155A     | -155.197 | 58.576  | -2.649 | 1.63E-02 | 0.236  | 0.810 | 0.291  | 7.74E-01 | 3.407   | 1.369  | 2.490  | 2.28E-02 |
| CAPN5       | -84.774  | 33.406  | -2.538 | 2.06E-02 | -0.065 | 0.462 | -0.142 | 8.89E-01 | 1.943   | 0.781  | 2.489  | 2.28E-02 |
| CXCR4       | -103.972 | 40.497  | -2.567 | 1.94E-02 | -0.351 | 0.560 | -0.626 | 5.39E-01 | 2.355   | 0.946  | 2.489  | 2.28E-02 |
| IGFL1       | 313.623  | 107.101 | 2.928  | 8.98E-03 | -0.434 | 1.481 | -0.293 | 7.73E-01 | -6.228  | 2.502  | -2.489 | 2.28E-02 |



|             |          |         |        |          |        |       |        |          |         |        |        |          |
|-------------|----------|---------|--------|----------|--------|-------|--------|----------|---------|--------|--------|----------|
| LOC10537554 | -84.942  | 33.530  | -2.533 | 2.08E-02 | -0.576 | 0.464 | -1.241 | 2.30E-01 | 1.947   | 0.783  | 2.486  | 2.30E-02 |
| RBM19       | 113.178  | 44.529  | 2.542  | 2.05E-02 | 0.475  | 0.616 | 0.771  | 4.51E-01 | -2.586  | 1.040  | -2.485 | 2.30E-02 |
| LOC10537021 | 152.962  | 57.063  | 2.681  | 1.53E-02 | 0.256  | 0.789 | 0.325  | 7.49E-01 | -3.313  | 1.333  | -2.485 | 2.30E-02 |
| RETNLB      | 138.163  | 49.250  | 2.805  | 1.17E-02 | -0.121 | 0.681 | -0.178 | 8.61E-01 | -2.859  | 1.151  | -2.485 | 2.30E-02 |
| LOC10537534 | -213.648 | 84.387  | -2.532 | 2.09E-02 | -1.424 | 1.167 | -1.220 | 2.38E-01 | 4.899   | 1.972  | 2.485  | 2.30E-02 |
| PRR30       | 130.368  | 49.736  | 2.621  | 1.73E-02 | 0.578  | 0.688 | 0.841  | 4.11E-01 | -2.885  | 1.162  | -2.483 | 2.31E-02 |
| LOC10537323 | -264.167 | 113.783 | -2.322 | 3.22E-02 | -2.612 | 1.574 | -1.660 | 1.14E-01 | 6.598   | 2.659  | 2.482  | 2.32E-02 |
| VPS13D      | 55.495   | 24.932  | 2.226  | 3.90E-02 | 0.386  | 0.345 | 1.118  | 2.78E-01 | -1.444  | 0.583  | -2.479 | 2.33E-02 |
| MIR660      | -93.919  | 43.134  | -2.177 | 4.30E-02 | -2.499 | 0.597 | -4.188 | 5.53E-04 | 2.499   | 1.008  | 2.479  | 2.33E-02 |
| LOC10537629 | 105.908  | 37.054  | 2.858  | 1.04E-02 | -0.308 | 0.513 | -0.600 | 5.56E-01 | -2.144  | 0.866  | -2.477 | 2.34E-02 |
| LOC10798604 | -172.445 | 68.262  | -2.526 | 2.11E-02 | -0.723 | 0.944 | -0.766 | 4.54E-01 | 3.949   | 1.595  | 2.476  | 2.34E-02 |
| ABCC11      | -148.933 | 58.051  | -2.566 | 1.95E-02 | 0.053  | 0.803 | 0.066  | 9.48E-01 | 3.357   | 1.356  | 2.475  | 2.35E-02 |
| SLC37A1     | 47.490   | 19.474  | 2.439  | 2.53E-02 | 0.305  | 0.269 | 1.131  | 2.73E-01 | -1.125  | 0.455  | -2.472 | 2.36E-02 |
| LOC10537750 | 124.705  | 50.214  | 2.483  | 2.31E-02 | 0.772  | 0.695 | 1.111  | 2.81E-01 | -2.896  | 1.173  | -2.469 | 2.38E-02 |
| SNORA25B    | 248.151  | 89.461  | 2.774  | 1.25E-02 | -0.177 | 1.237 | -0.143 | 8.88E-01 | -5.159  | 2.090  | -2.468 | 2.38E-02 |
| FGF12.AS2   | 125.533  | 44.340  | 2.831  | 1.11E-02 | -0.162 | 0.613 | -0.264 | 7.95E-01 | -2.554  | 1.036  | -2.465 | 2.40E-02 |
| SLC25A40    | -108.025 | 41.844  | -2.582 | 1.88E-02 | -0.382 | 0.579 | -0.660 | 5.17E-01 | 2.409   | 0.978  | 2.464  | 2.40E-02 |
| LOC10099628 | -32.055  | 14.993  | -2.138 | 4.65E-02 | -0.935 | 0.207 | -4.510 | 2.71E-04 | 0.863   | 0.350  | 2.463  | 2.41E-02 |
| LOC10537410 | 76.923   | 30.724  | 2.504  | 2.21E-02 | 0.197  | 0.425 | 0.463  | 6.49E-01 | -1.768  | 0.718  | -2.463 | 2.41E-02 |
| SDCBP2.AS1  | 79.407   | 29.465  | 2.695  | 1.48E-02 | 0.107  | 0.408 | 0.263  | 7.96E-01 | -1.695  | 0.688  | -2.462 | 2.41E-02 |
| ZNF826P     | -513.797 | 198.618 | -2.587 | 1.86E-02 | -0.679 | 2.747 | -0.247 | 8.08E-01 | 11.427  | 4.641  | 2.462  | 2.41E-02 |
| ANKRD61     | 167.554  | 64.046  | 2.616  | 1.75E-02 | 0.451  | 0.886 | 0.509  | 6.17E-01 | -3.685  | 1.496  | -2.462 | 2.41E-02 |
| MIR4296     | 795.979  | 284.137 | 2.801  | 1.18E-02 | -0.908 | 3.930 | -0.231 | 8.20E-01 | -16.332 | 6.639  | -2.460 | 2.42E-02 |
| LINC01632   | 3.555    | 1.394   | 2.551  | 2.00E-02 | 0.014  | 0.019 | 0.710  | 4.87E-01 | -0.080  | 0.033  | -2.459 | 2.43E-02 |
| MIS18A      | 76.775   | 31.436  | 2.442  | 2.51E-02 | 0.404  | 0.435 | 0.928  | 3.66E-01 | -1.806  | 0.734  | -2.459 | 2.43E-02 |
| LOC10537400 | -104.847 | 43.881  | -2.389 | 2.80E-02 | -0.596 | 0.607 | -0.981 | 3.39E-01 | 2.520   | 1.025  | 2.458  | 2.43E-02 |
| DDN.AS1     | -14.717  | 7.195   | -2.046 | 5.57E-02 | -0.401 | 0.100 | -4.031 | 7.83E-04 | 0.413   | 0.168  | 2.457  | 2.44E-02 |
| ANKRD36C    | 108.942  | 47.647  | 2.286  | 3.46E-02 | 1.109  | 0.659 | 1.682  | 1.10E-01 | -2.733  | 1.113  | -2.455 | 2.45E-02 |
| LOC10192956 | 258.746  | 90.934  | 2.845  | 1.07E-02 | -0.031 | 1.258 | -0.024 | 9.81E-01 | -5.215  | 2.125  | -2.455 | 2.45E-02 |
| LOC10798591 | -82.348  | 32.912  | -2.502 | 2.22E-02 | -0.173 | 0.455 | -0.380 | 7.08E-01 | 1.886   | 0.769  | 2.453  | 2.46E-02 |
| LOC10798439 | 122.759  | 45.232  | 2.714  | 1.42E-02 | 0.214  | 0.626 | 0.343  | 7.36E-01 | -2.592  | 1.057  | -2.452 | 2.46E-02 |
| LOC10537034 | 115.783  | 44.716  | 2.589  | 1.85E-02 | 0.257  | 0.619 | 0.415  | 6.83E-01 | -2.562  | 1.045  | -2.452 | 2.46E-02 |
| LINC00583   | -127.262 | 61.520  | -2.069 | 5.33E-02 | -4.006 | 0.851 | -4.708 | 1.75E-04 | 3.523   | 1.437  | 2.451  | 2.47E-02 |
| CROT        | -100.068 | 40.562  | -2.467 | 2.39E-02 | -0.464 | 0.561 | -0.827 | 4.19E-01 | 2.323   | 0.948  | 2.451  | 2.47E-02 |
| CDKAL1      | 68.035   | 30.089  | 2.261  | 3.64E-02 | 0.671  | 0.416 | 1.612  | 1.24E-01 | -1.723  | 0.703  | -2.450 | 2.47E-02 |
| LOC10537736 | 78.272   | 31.573  | 2.479  | 2.33E-02 | 0.311  | 0.437 | 0.712  | 4.86E-01 | -1.807  | 0.738  | -2.450 | 2.48E-02 |
| LOC10798622 | 193.677  | 100.509 | 1.927  | 6.99E-02 | 3.726  | 1.390 | 2.680  | 1.53E-02 | -5.751  | 2.348  | -2.449 | 2.48E-02 |
| B3GAT3      | -222.010 | 89.930  | -2.469 | 2.38E-02 | -0.718 | 1.244 | -0.577 | 5.71E-01 | 5.144   | 2.101  | 2.448  | 2.48E-02 |
| LOC11226823 | -36.859  | 17.545  | -2.101 | 5.00E-02 | -0.872 | 0.243 | -3.595 | 2.07E-03 | 1.003   | 0.410  | 2.448  | 2.48E-02 |
| TRC.GCA10.1 | 1560.140 | 557.496 | 2.798  | 1.19E-02 | -0.451 | 7.711 | -0.059 | 9.54E-01 | -31.875 | 13.026 | -2.447 | 2.49E-02 |
| ABCC8       | -54.674  | 23.436  | -2.333 | 3.15E-02 | -0.251 | 0.324 | -0.776 | 4.48E-01 | 1.339   | 0.548  | 2.446  | 2.49E-02 |
| NRGN        | 135.634  | 60.970  | 2.225  | 3.91E-02 | 1.962  | 0.843 | 2.327  | 3.19E-02 | -3.483  | 1.425  | -2.445 | 2.50E-02 |
| LOC10798534 | 182.863  | 76.513  | 2.390  | 2.80E-02 | 1.405  | 1.058 | 1.327  | 2.01E-01 | -4.371  | 1.788  | -2.445 | 2.50E-02 |
| NRK         | 68.752   | 25.777  | 2.667  | 1.57E-02 | -0.096 | 0.357 | -0.268 | 7.91E-01 | -1.472  | 0.602  | -2.445 | 2.50E-02 |
| UNC13A      | -87.819  | 35.616  | -2.466 | 2.40E-02 | -0.256 | 0.493 | -0.520 | 6.09E-01 | 2.033   | 0.832  | 2.443  | 2.51E-02 |
| LOC10050656 | -142.150 | 57.947  | -2.453 | 2.46E-02 | -0.614 | 0.802 | -0.766 | 4.54E-01 | 3.307   | 1.354  | 2.442  | 2.51E-02 |
| LOC10537778 | 43.045   | 15.890  | 2.709  | 1.44E-02 | 0.024  | 0.220 | 0.107  | 9.16E-01 | -0.907  | 0.371  | -2.442 | 2.51E-02 |
| CLEC17A     | 79.999   | 28.978  | 2.761  | 1.29E-02 | -0.233 | 0.401 | -0.582 | 5.68E-01 | -1.653  | 0.677  | -2.442 | 2.52E-02 |
| NSD3        | 75.491   | 31.900  | 2.366  | 2.94E-02 | 0.484  | 0.441 | 1.096  | 2.88E-01 | -1.820  | 0.745  | -2.441 | 2.52E-02 |
| CDRT15      | -40.776  | 19.152  | -2.129 | 4.73E-02 | -0.876 | 0.265 | -3.306 | 3.93E-03 | 1.092   | 0.447  | 2.441  | 2.52E-02 |
| FOXC2.AS1   | 49.502   | 18.334  | 2.700  | 1.47E-02 | 0.030  | 0.254 | 0.120  | 9.06E-01 | -1.044  | 0.428  | -2.438 | 2.54E-02 |
| EDA2R       | -143.047 | 56.125  | -2.549 | 2.02E-02 | -0.340 | 0.776 | -0.437 | 6.67E-01 | 3.197   | 1.311  | 2.438  | 2.54E-02 |
| LOC10798611 | 64.299   | 26.126  | 2.461  | 2.42E-02 | 0.160  | 0.361 | 0.443  | 6.63E-01 | -1.487  | 0.610  | -2.437 | 2.54E-02 |

|             |          |         |        |          |        |       |        |          |         |       |        |          |
|-------------|----------|---------|--------|----------|--------|-------|--------|----------|---------|-------|--------|----------|
| SLC39A4     | -10.645  | 4.469   | -2.382 | 2.85E-02 | -0.093 | 0.062 | -1.502 | 1.50E-01 | 0.254   | 0.104 | 2.436  | 2.55E-02 |
| LOC1002887  | -108.429 | 47.582  | -2.279 | 3.51E-02 | -1.643 | 0.658 | -2.497 | 2.25E-02 | 2.706   | 1.112 | 2.434  | 2.56E-02 |
| TSBP1_7     | -15.653  | 6.653   | -2.353 | 3.02E-02 | -0.197 | 0.092 | -2.146 | 4.58E-02 | 0.378   | 0.155 | 2.434  | 2.56E-02 |
| TRG.CCC3.1  | 708.068  | 256.315 | 2.762  | 1.28E-02 | -0.668 | 3.545 | -0.188 | 8.53E-01 | -14.572 | 5.989 | -2.433 | 2.56E-02 |
| LINC00933   | 140.637  | 51.096  | 2.752  | 1.31E-02 | -0.203 | 0.707 | -0.287 | 7.78E-01 | -2.899  | 1.194 | -2.428 | 2.59E-02 |
| IL20RA      | 70.998   | 30.450  | 2.332  | 3.15E-02 | 0.455  | 0.421 | 1.081  | 2.94E-01 | -1.727  | 0.711 | -2.428 | 2.59E-02 |
| B3GALT1     | 60.277   | 26.444  | 2.279  | 3.51E-02 | 0.265  | 0.366 | 0.726  | 4.77E-01 | -1.500  | 0.618 | -2.428 | 2.59E-02 |
| HLA.DQA2_5  | 29.068   | 10.373  | 2.802  | 1.18E-02 | -0.065 | 0.143 | -0.451 | 6.57E-01 | -0.588  | 0.242 | -2.427 | 2.60E-02 |
| LOC1053720  | -935.549 | 371.900 | -2.516 | 2.16E-02 | -1.240 | 5.144 | -0.241 | 8.12E-01 | 21.080  | 8.689 | 2.426  | 2.60E-02 |
| RBMXL2      | 77.257   | 30.595  | 2.525  | 2.12E-02 | 0.337  | 0.423 | 0.797  | 4.36E-01 | -1.734  | 0.715 | -2.426 | 2.60E-02 |
| IGHV3.21    | 11.010   | 4.043   | 2.724  | 1.39E-02 | 0.000  | 0.056 | 0.000  | 1.00E+00 | -0.229  | 0.094 | -2.425 | 2.61E-02 |
| IGHV3.48    | 11.010   | 4.043   | 2.724  | 1.39E-02 | 0.000  | 0.056 | 0.000  | 1.00E+00 | -0.229  | 0.094 | -2.425 | 2.61E-02 |
| IGHV3.52    | 11.010   | 4.043   | 2.724  | 1.39E-02 | 0.000  | 0.056 | 0.000  | 1.00E+00 | -0.229  | 0.094 | -2.425 | 2.61E-02 |
| IGHV3.64    | 11.010   | 4.043   | 2.724  | 1.39E-02 | 0.000  | 0.056 | 0.000  | 1.00E+00 | -0.229  | 0.094 | -2.425 | 2.61E-02 |
| PRAMEF34P   | 1.756    | 0.645   | 2.724  | 1.39E-02 | 0.000  | 0.009 | 0.000  | 1.00E+00 | -0.037  | 0.015 | -2.425 | 2.61E-02 |
| KIR2DL2_10  | 12.245   | 4.496   | 2.724  | 1.39E-02 | 0.000  | 0.062 | 0.000  | 1.00E+00 | -0.255  | 0.105 | -2.425 | 2.61E-02 |
| MIR92B      | 80.973   | 29.730  | 2.724  | 1.39E-02 | 0.000  | 0.411 | 0.000  | 1.00E+00 | -1.684  | 0.695 | -2.425 | 2.61E-02 |
| MIR664A     | 94.797   | 34.806  | 2.724  | 1.39E-02 | 0.000  | 0.481 | 0.000  | 1.00E+00 | -1.972  | 0.813 | -2.425 | 2.61E-02 |
| MIR10B      | 35.333   | 12.973  | 2.724  | 1.39E-02 | 0.000  | 0.179 | 0.000  | 1.00E+00 | -0.735  | 0.303 | -2.425 | 2.61E-02 |
| MIR4440     | 118.980  | 43.685  | 2.724  | 1.39E-02 | 0.000  | 0.604 | 0.000  | 1.00E+00 | -2.475  | 1.021 | -2.425 | 2.61E-02 |
| EEFSEC      | 0.956    | 0.351   | 2.724  | 1.39E-02 | 0.000  | 0.005 | 0.000  | 1.00E+00 | -0.020  | 0.008 | -2.425 | 2.61E-02 |
| LOC1079861  | 14.694   | 5.395   | 2.724  | 1.39E-02 | 0.000  | 0.075 | 0.000  | 1.00E+00 | -0.306  | 0.126 | -2.425 | 2.61E-02 |
| RUFY1.AS1   | 3.954    | 1.452   | 2.724  | 1.39E-02 | 0.000  | 0.020 | 0.000  | 1.00E+00 | -0.082  | 0.034 | -2.425 | 2.61E-02 |
| TRBV25.1    | 22.597   | 8.297   | 2.724  | 1.39E-02 | 0.000  | 0.115 | 0.000  | 1.00E+00 | -0.470  | 0.194 | -2.425 | 2.61E-02 |
| LOC10537924 | 54.283   | 19.931  | 2.724  | 1.39E-02 | 0.000  | 0.276 | 0.000  | 1.00E+00 | -1.129  | 0.466 | -2.425 | 2.61E-02 |
| MIR3926.1   | 53.242   | 19.549  | 2.724  | 1.39E-02 | 0.000  | 0.270 | 0.000  | 1.00E+00 | -1.108  | 0.457 | -2.425 | 2.61E-02 |
| MIR4471     | 187.310  | 68.774  | 2.724  | 1.39E-02 | 0.000  | 0.951 | 0.000  | 1.00E+00 | -3.897  | 1.607 | -2.425 | 2.61E-02 |
| MIR6845     | 254.864  | 93.578  | 2.724  | 1.39E-02 | 0.000  | 1.294 | 0.000  | 1.00E+00 | -5.302  | 2.186 | -2.425 | 2.61E-02 |
| MIR3689A    | 49.829   | 18.296  | 2.724  | 1.39E-02 | 0.000  | 0.253 | 0.000  | 1.00E+00 | -1.037  | 0.427 | -2.425 | 2.61E-02 |
| FNBP4       | 2.263    | 0.831   | 2.724  | 1.39E-02 | 0.000  | 0.011 | 0.000  | 1.00E+00 | -0.047  | 0.019 | -2.425 | 2.61E-02 |
| MIR3167     | 91.451   | 33.578  | 2.724  | 1.39E-02 | 0.000  | 0.464 | 0.000  | 1.00E+00 | -1.902  | 0.785 | -2.425 | 2.61E-02 |
| BLOC151.RDH | 6.408    | 2.353   | 2.724  | 1.39E-02 | 0.000  | 0.033 | 0.000  | 1.00E+00 | -0.133  | 0.055 | -2.425 | 2.61E-02 |
| TRAJ7       | 790.512  | 290.249 | 2.724  | 1.39E-02 | 0.000  | 4.015 | 0.000  | 1.00E+00 | -16.445 | 6.782 | -2.425 | 2.61E-02 |
| IGHV4.30.2  | 21.835   | 8.017   | 2.724  | 1.39E-02 | 0.000  | 0.111 | 0.000  | 1.00E+00 | -0.454  | 0.187 | -2.425 | 2.61E-02 |
| SNORD116.24 | 413.477  | 151.815 | 2.724  | 1.39E-02 | 0.000  | 2.100 | 0.000  | 1.00E+00 | -8.601  | 3.547 | -2.425 | 2.61E-02 |
| TRH.GTG1.9  | 377.872  | 138.742 | 2.724  | 1.39E-02 | 0.000  | 1.919 | 0.000  | 1.00E+00 | -7.861  | 3.242 | -2.425 | 2.61E-02 |
| SNORA78     | 306.038  | 112.367 | 2.724  | 1.39E-02 | 0.000  | 1.554 | 0.000  | 1.00E+00 | -6.366  | 2.625 | -2.425 | 2.61E-02 |
| LOC388242   | 36.791   | 13.508  | 2.724  | 1.39E-02 | 0.000  | 0.187 | 0.000  | 1.00E+00 | -0.765  | 0.316 | -2.425 | 2.61E-02 |
| MIR4730     | 51.141   | 18.777  | 2.724  | 1.39E-02 | 0.000  | 0.260 | 0.000  | 1.00E+00 | -1.064  | 0.439 | -2.425 | 2.61E-02 |
| SNORD35B    | 132.501  | 48.650  | 2.724  | 1.39E-02 | 0.000  | 0.673 | 0.000  | 1.00E+00 | -2.756  | 1.137 | -2.425 | 2.61E-02 |
| RDH13       | 0.660    | 0.242   | 2.724  | 1.39E-02 | 0.000  | 0.003 | 0.000  | 1.00E+00 | -0.014  | 0.006 | -2.425 | 2.61E-02 |
| SHANK3      | 1.016    | 0.373   | 2.724  | 1.39E-02 | 0.000  | 0.005 | 0.000  | 1.00E+00 | -0.021  | 0.009 | -2.425 | 2.61E-02 |
| MIR12129    | 409.124  | 150.217 | 2.724  | 1.39E-02 | 0.000  | 2.078 | 0.000  | 1.00E+00 | -8.511  | 3.510 | -2.425 | 2.61E-02 |
| LOC1053772  | 2.805    | 1.030   | 2.724  | 1.39E-02 | 0.000  | 0.014 | 0.000  | 1.00E+00 | -0.058  | 0.024 | -2.425 | 2.61E-02 |
| OR2A12_1    | 0.934    | 0.343   | 2.724  | 1.39E-02 | 0.000  | 0.005 | 0.000  | 1.00E+00 | -0.019  | 0.008 | -2.425 | 2.61E-02 |
| SMG1P3_1    | 4.625    | 1.698   | 2.724  | 1.39E-02 | 0.000  | 0.023 | 0.000  | 1.00E+00 | -0.096  | 0.040 | -2.425 | 2.61E-02 |
| LOC1053781  | 27.663   | 10.157  | 2.724  | 1.39E-02 | 0.000  | 0.140 | 0.000  | 1.00E+00 | -0.575  | 0.237 | -2.425 | 2.61E-02 |
| LOC1053777  | 53.106   | 19.499  | 2.724  | 1.39E-02 | 0.000  | 0.270 | 0.000  | 1.00E+00 | -1.105  | 0.456 | -2.425 | 2.61E-02 |
| ABCC6P1_1   | 14.667   | 5.385   | 2.724  | 1.39E-02 | 0.000  | 0.074 | 0.000  | 1.00E+00 | -0.305  | 0.126 | -2.425 | 2.61E-02 |
| MIR378J_1   | 213.946  | 78.554  | 2.724  | 1.39E-02 | 0.000  | 1.087 | 0.000  | 1.00E+00 | -4.451  | 1.835 | -2.425 | 2.61E-02 |
| LOC10192945 | 9.796    | 3.597   | 2.724  | 1.39E-02 | 0.000  | 0.050 | 0.000  | 1.00E+00 | -0.204  | 0.084 | -2.425 | 2.61E-02 |
| CRHR1_1     | 2.961    | 1.087   | 2.724  | 1.39E-02 | 0.000  | 0.015 | 0.000  | 1.00E+00 | -0.062  | 0.025 | -2.425 | 2.61E-02 |
| LENG8.AS1_1 | 4.357    | 1.600   | 2.724  | 1.39E-02 | 0.000  | 0.022 | 0.000  | 1.00E+00 | -0.091  | 0.037 | -2.425 | 2.61E-02 |

|             |          |         |        |          |        |       |        |          |         |       |        |          |
|-------------|----------|---------|--------|----------|--------|-------|--------|----------|---------|-------|--------|----------|
| TBX22_1     | 3.172    | 1.164   | 2.724  | 1.39E-02 | 0.000  | 0.016 | 0.000  | 1.00E+00 | -0.066  | 0.027 | -2.425 | 2.61E-02 |
| HLA.DQA1_4  | 12.300   | 4.516   | 2.724  | 1.39E-02 | 0.000  | 0.062 | 0.000  | 1.00E+00 | -0.256  | 0.106 | -2.425 | 2.61E-02 |
| NOTCH4_5    | 5.676    | 2.084   | 2.724  | 1.39E-02 | 0.000  | 0.029 | 0.000  | 1.00E+00 | -0.118  | 0.049 | -2.425 | 2.61E-02 |
| LOC10537965 | 32.799   | 12.043  | 2.724  | 1.39E-02 | 0.000  | 0.167 | 0.000  | 1.00E+00 | -0.682  | 0.281 | -2.425 | 2.61E-02 |
| TRF.GAA1.1_ | 638.907  | 234.585 | 2.724  | 1.39E-02 | 0.000  | 3.245 | 0.000  | 1.00E+00 | -13.291 | 5.481 | -2.425 | 2.61E-02 |
| LOC10029414 | 1.053    | 0.387   | 2.724  | 1.39E-02 | 0.000  | 0.005 | 0.000  | 1.00E+00 | -0.022  | 0.009 | -2.425 | 2.61E-02 |
| LINC02028   | -120.106 | 49.858  | -2.409 | 2.69E-02 | -0.497 | 0.690 | -0.721 | 4.80E-01 | 2.824   | 1.165 | 2.424  | 2.61E-02 |
| LMNTD2_1    | 54.611   | 20.922  | 2.610  | 1.77E-02 | 0.084  | 0.289 | 0.290  | 7.75E-01 | -1.185  | 0.489 | -2.423 | 2.61E-02 |
| POPDC2      | -84.964  | 37.624  | -2.258 | 3.66E-02 | -1.019 | 0.520 | -1.958 | 6.59E-02 | 2.129   | 0.879 | 2.422  | 2.62E-02 |
| NET1        | 86.368   | 37.193  | 2.322  | 3.22E-02 | 0.628  | 0.514 | 1.221  | 2.38E-01 | -2.105  | 0.869 | -2.422 | 2.62E-02 |
| NPPA        | 126.194  | 48.326  | 2.611  | 1.77E-02 | 0.140  | 0.668 | 0.210  | 8.36E-01 | -2.734  | 1.129 | -2.421 | 2.63E-02 |
| LOC10798602 | 166.558  | 65.461  | 2.544  | 2.03E-02 | 0.765  | 0.905 | 0.845  | 4.09E-01 | -3.703  | 1.529 | -2.421 | 2.63E-02 |
| CLEC4A      | 94.892   | 37.949  | 2.501  | 2.23E-02 | -0.009 | 0.525 | -0.016 | 9.87E-01 | -2.146  | 0.887 | -2.420 | 2.63E-02 |
| GREB1       | 51.062   | 18.831  | 2.712  | 1.43E-02 | -0.201 | 0.260 | -0.772 | 4.50E-01 | -1.064  | 0.440 | -2.419 | 2.64E-02 |
| RPRD2       | 60.388   | 24.095  | 2.506  | 2.20E-02 | 0.168  | 0.333 | 0.505  | 6.20E-01 | -1.362  | 0.563 | -2.419 | 2.64E-02 |
| TOMM40L     | 58.173   | 25.174  | 2.311  | 3.29E-02 | 0.447  | 0.348 | 1.284  | 2.15E-01 | -1.423  | 0.588 | -2.419 | 2.64E-02 |
| CRBN        | -138.757 | 58.488  | -2.372 | 2.90E-02 | -0.754 | 0.809 | -0.932 | 3.64E-01 | 3.305   | 1.367 | 2.419  | 2.64E-02 |
| LRRC4       | 76.770   | 27.820  | 2.760  | 1.29E-02 | 0.055  | 0.385 | 0.143  | 8.88E-01 | -1.572  | 0.650 | -2.418 | 2.64E-02 |
| LOC10537516 | 86.096   | 32.191  | 2.675  | 1.55E-02 | -0.015 | 0.445 | -0.034 | 9.73E-01 | -1.819  | 0.752 | -2.418 | 2.64E-02 |
| ZNF208      | -110.521 | 44.315  | -2.494 | 2.26E-02 | -0.320 | 0.613 | -0.522 | 6.08E-01 | 2.503   | 1.035 | 2.418  | 2.65E-02 |
| TRBC1_1     | 22.335   | 8.380   | 2.665  | 1.58E-02 | 0.018  | 0.116 | 0.157  | 8.77E-01 | -0.473  | 0.196 | -2.417 | 2.65E-02 |
| MIR149      | 133.758  | 50.185  | 2.665  | 1.58E-02 | 0.109  | 0.694 | 0.157  | 8.77E-01 | -2.835  | 1.173 | -2.417 | 2.65E-02 |
| LOC10536989 | 86.393   | 33.868  | 2.551  | 2.01E-02 | 0.078  | 0.468 | 0.165  | 8.70E-01 | -1.913  | 0.791 | -2.417 | 2.65E-02 |
| GRAMD1C     | -126.591 | 52.048  | -2.432 | 2.57E-02 | -0.496 | 0.720 | -0.688 | 5.00E-01 | 2.940   | 1.216 | 2.417  | 2.65E-02 |
| GOLGA8M     | -0.406   | 0.196   | -2.070 | 5.32E-02 | -0.011 | 0.003 | -4.083 | 6.98E-04 | 0.011   | 0.005 | 2.417  | 2.65E-02 |
| LOC10537667 | 142.271  | 51.840  | 2.744  | 1.33E-02 | -0.216 | 0.717 | -0.302 | 7.66E-01 | -2.924  | 1.211 | -2.414 | 2.66E-02 |
| LOC11226823 | 227.403  | 109.704 | 2.073  | 5.28E-02 | 3.709  | 1.517 | 2.444  | 2.51E-02 | -6.186  | 2.563 | -2.414 | 2.67E-02 |
| LINC01370   | -302.156 | 125.910 | -2.400 | 2.74E-02 | -2.079 | 1.742 | -1.194 | 2.48E-01 | 7.095   | 2.942 | 2.412  | 2.68E-02 |
| LOC10537320 | -38.642  | 19.415  | -1.990 | 6.20E-02 | -1.262 | 0.269 | -4.701 | 1.78E-04 | 1.094   | 0.454 | 2.411  | 2.68E-02 |
| AAR2        | 67.162   | 23.982  | 2.801  | 1.18E-02 | -0.113 | 0.332 | -0.342 | 7.36E-01 | -1.351  | 0.560 | -2.411 | 2.68E-02 |
| LOC10537374 | 181.564  | 72.719  | 2.497  | 2.25E-02 | 0.853  | 1.006 | 0.848  | 4.08E-01 | -4.095  | 1.699 | -2.410 | 2.69E-02 |
| LOC10537039 | -142.250 | 55.451  | -2.565 | 1.95E-02 | 0.186  | 0.767 | 0.243  | 8.11E-01 | 3.123   | 1.296 | 2.410  | 2.69E-02 |
| LOC10050706 | -111.770 | 46.819  | -2.387 | 2.82E-02 | -0.610 | 0.648 | -0.942 | 3.59E-01 | 2.635   | 1.094 | 2.408  | 2.70E-02 |
| RIMBP3B     | -1.938   | 0.923   | -2.099 | 5.02E-02 | -0.052 | 0.013 | -4.066 | 7.25E-04 | 0.052   | 0.022 | 2.407  | 2.70E-02 |
| IGLC4       | 64.974   | 23.097  | 2.813  | 1.15E-02 | -0.224 | 0.319 | -0.700 | 4.93E-01 | -1.299  | 0.540 | -2.407 | 2.70E-02 |
| LOC10798689 | -123.928 | 55.286  | -2.242 | 3.78E-02 | -2.094 | 0.765 | -2.738 | 1.35E-02 | 3.109   | 1.292 | 2.407  | 2.71E-02 |
| GREB1L      | 75.501   | 32.937  | 2.292  | 3.42E-02 | 0.581  | 0.456 | 1.275  | 2.19E-01 | -1.852  | 0.770 | -2.406 | 2.71E-02 |
| LINC02646   | 112.190  | 48.324  | 2.322  | 3.22E-02 | 0.896  | 0.668 | 1.340  | 1.97E-01 | -2.717  | 1.129 | -2.406 | 2.71E-02 |
| FAF1        | 67.261   | 25.836  | 2.603  | 1.80E-02 | 0.126  | 0.357 | 0.354  | 7.28E-01 | -1.452  | 0.604 | -2.406 | 2.71E-02 |
| QPCT        | -371.130 | 153.282 | -2.421 | 2.63E-02 | -0.894 | 2.120 | -0.422 | 6.78E-01 | 8.612   | 3.581 | 2.405  | 2.72E-02 |
| GRHL1       | -176.477 | 70.845  | -2.491 | 2.27E-02 | -0.145 | 0.980 | -0.148 | 8.84E-01 | 3.979   | 1.655 | 2.404  | 2.72E-02 |
| LOC10537694 | -135.965 | 64.448  | -2.110 | 4.91E-02 | -2.947 | 0.891 | -3.306 | 3.93E-03 | 3.620   | 1.506 | 2.404  | 2.72E-02 |
| MEGF9       | -97.527  | 40.645  | -2.399 | 2.75E-02 | -0.457 | 0.562 | -0.812 | 4.27E-01 | 2.282   | 0.950 | 2.403  | 2.72E-02 |
| FAM167A.AS  | 20.810   | 7.349   | 2.832  | 1.11E-02 | -0.053 | 0.102 | -0.523 | 6.07E-01 | -0.413  | 0.172 | -2.403 | 2.72E-02 |
| MT2A        | 249.140  | 90.036  | 2.767  | 1.27E-02 | -0.014 | 1.245 | -0.011 | 9.91E-01 | -5.050  | 2.104 | -2.401 | 2.74E-02 |
| LOC10537252 | -183.478 | 74.806  | -2.453 | 2.46E-02 | -0.382 | 1.035 | -0.369 | 7.17E-01 | 4.196   | 1.748 | 2.400  | 2.74E-02 |
| LOC10798690 | -4.175   | 2.208   | -1.891 | 7.48E-02 | -0.150 | 0.031 | -4.910 | 1.13E-04 | 0.124   | 0.052 | 2.399  | 2.75E-02 |
| COQ4        | 161.605  | 62.582  | 2.582  | 1.88E-02 | 0.282  | 0.866 | 0.326  | 7.49E-01 | -3.508  | 1.462 | -2.399 | 2.75E-02 |
| LOC10798627 | 123.951  | 45.008  | 2.754  | 1.31E-02 | -0.393 | 0.623 | -0.631 | 5.36E-01 | -2.522  | 1.052 | -2.398 | 2.75E-02 |
| LOC10537524 | -112.886 | 48.113  | -2.346 | 3.06E-02 | -0.549 | 0.665 | -0.825 | 4.20E-01 | 2.695   | 1.124 | 2.397  | 2.76E-02 |
| TMEM87B     | 131.368  | 50.688  | 2.592  | 1.84E-02 | 0.487  | 0.701 | 0.695  | 4.96E-01 | -2.839  | 1.184 | -2.397 | 2.76E-02 |
| LOC10537553 | -451.126 | 186.131 | -2.424 | 2.61E-02 | -0.906 | 2.575 | -0.352 | 7.29E-01 | 10.421  | 4.349 | 2.396  | 2.76E-02 |
| STYXL2      | 69.158   | 26.357  | 2.624  | 1.72E-02 | -0.124 | 0.365 | -0.339 | 7.38E-01 | -1.476  | 0.616 | -2.396 | 2.76E-02 |

|             |           |         |        |          |         |       |        |          |         |        |        |          |
|-------------|-----------|---------|--------|----------|---------|-------|--------|----------|---------|--------|--------|----------|
| VWA1        | -92.981   | 38.434  | -2.419 | 2.64E-02 | -0.364  | 0.532 | -0.684 | 5.02E-01 | 2.151   | 0.898  | 2.396  | 2.77E-02 |
| LOC10537374 | 155.258   | 60.831  | 2.552  | 2.00E-02 | 0.278   | 0.841 | 0.330  | 7.45E-01 | -3.404  | 1.421  | -2.395 | 2.77E-02 |
| MIR7843     | -377.462  | 196.442 | -1.921 | 7.06E-02 | -13.038 | 2.717 | -4.799 | 1.44E-04 | 10.991  | 4.590  | 2.395  | 2.77E-02 |
| SPOPL       | 83.631    | 35.703  | 2.342  | 3.09E-02 | 0.523   | 0.494 | 1.059  | 3.04E-01 | -1.998  | 0.834  | -2.395 | 2.77E-02 |
| LOC10537953 | -7.745    | 3.761   | -2.059 | 5.42E-02 | -0.210  | 0.052 | -4.044 | 7.61E-04 | 0.210   | 0.088  | 2.394  | 2.78E-02 |
| MIR4493     | -95.063   | 46.161  | -2.059 | 5.42E-02 | -2.582  | 0.638 | -4.044 | 7.61E-04 | 2.582   | 1.079  | 2.394  | 2.78E-02 |
| IGKV2.40_1  | -9.559    | 4.641   | -2.059 | 5.42E-02 | -0.260  | 0.064 | -4.044 | 7.61E-04 | 0.260   | 0.108  | 2.394  | 2.78E-02 |
| AP2A2_2     | -4.750    | 2.306   | -2.059 | 5.42E-02 | -0.129  | 0.032 | -4.044 | 7.61E-04 | 0.129   | 0.054  | 2.394  | 2.78E-02 |
| MIR622      | -216.863  | 105.304 | -2.059 | 5.42E-02 | -5.891  | 1.457 | -4.044 | 7.61E-04 | 5.891   | 2.460  | 2.394  | 2.78E-02 |
| LOC10537111 | -4.819    | 2.340   | -2.059 | 5.42E-02 | -0.131  | 0.032 | -4.044 | 7.61E-04 | 0.131   | 0.055  | 2.394  | 2.78E-02 |
| NTMT1       | -28.048   | 13.168  | -2.130 | 4.72E-02 | -0.517  | 0.182 | -2.838 | 1.09E-02 | 0.737   | 0.308  | 2.394  | 2.78E-02 |
| LOC10537255 | -165.735  | 70.084  | -2.365 | 2.95E-02 | -1.119  | 0.969 | -1.154 | 2.63E-01 | 3.920   | 1.637  | 2.394  | 2.78E-02 |
| IFIT5       | 70.445    | 26.604  | 2.648  | 1.64E-02 | 0.004   | 0.368 | 0.011  | 9.91E-01 | -1.488  | 0.622  | -2.394 | 2.78E-02 |
| LOC11226845 | 73.239    | 27.376  | 2.675  | 1.54E-02 | 0.013   | 0.379 | 0.034  | 9.74E-01 | -1.531  | 0.640  | -2.393 | 2.78E-02 |
| PDZD4       | 46.497    | 21.102  | 2.203  | 4.08E-02 | 0.558   | 0.292 | 1.912  | 7.19E-02 | -1.179  | 0.493  | -2.392 | 2.79E-02 |
| LOC10537373 | 480.527   | 179.821 | 2.672  | 1.55E-02 | 0.430   | 2.487 | 0.173  | 8.65E-01 | -10.045 | 4.201  | -2.391 | 2.79E-02 |
| SLC35A2     | -146.515  | 59.612  | -2.458 | 2.43E-02 | -0.294  | 0.825 | -0.357 | 7.25E-01 | 3.325   | 1.393  | 2.388  | 2.81E-02 |
| MDH1        | 228.355   | 95.578  | 2.389  | 2.80E-02 | 1.091   | 1.322 | 0.826  | 4.20E-01 | -5.327  | 2.233  | -2.385 | 2.83E-02 |
| PCDH18      | -112.341  | 47.369  | -2.372 | 2.91E-02 | -0.468  | 0.655 | -0.714 | 4.84E-01 | 2.640   | 1.107  | 2.385  | 2.83E-02 |
| HGD         | -257.715  | 117.137 | -2.200 | 4.11E-02 | -3.460  | 1.620 | -2.135 | 4.67E-02 | 6.520   | 2.737  | 2.382  | 2.84E-02 |
| ZZZ3        | -172.091  | 71.005  | -2.424 | 2.61E-02 | -0.478  | 0.982 | -0.486 | 6.33E-01 | 3.952   | 1.659  | 2.382  | 2.85E-02 |
| ALS2        | 65.548    | 25.299  | 2.591  | 1.84E-02 | -0.055  | 0.350 | -0.156 | 8.77E-01 | -1.408  | 0.591  | -2.382 | 2.85E-02 |
| LINC00491   | -249.555  | 99.107  | -2.518 | 2.15E-02 | -0.259  | 1.371 | -0.189 | 8.52E-01 | 5.515   | 2.316  | 2.382  | 2.85E-02 |
| ARHGEF1     | -163.036  | 69.069  | -2.360 | 2.97E-02 | -0.466  | 0.955 | -0.488 | 6.32E-01 | 3.842   | 1.614  | 2.381  | 2.85E-02 |
| C4BPB       | -232.461  | 92.887  | -2.503 | 2.22E-02 | 0.121   | 1.285 | 0.095  | 9.26E-01 | 5.167   | 2.170  | 2.381  | 2.85E-02 |
| C20orf141   | -25.217   | 10.999  | -2.293 | 3.41E-02 | -0.343  | 0.152 | -2.252 | 3.71E-02 | 0.612   | 0.257  | 2.380  | 2.86E-02 |
| TNFAIP3     | 55.844    | 24.275  | 2.301  | 3.36E-02 | 0.409   | 0.336 | 1.219  | 2.39E-01 | -1.350  | 0.567  | -2.380 | 2.86E-02 |
| ST6GALNAC4  | -175.142  | 70.341  | -2.490 | 2.28E-02 | -0.013  | 0.973 | -0.014 | 9.89E-01 | 3.911   | 1.643  | 2.380  | 2.86E-02 |
| CLCA4       | 122.333   | 43.888  | 2.787  | 1.22E-02 | -0.452  | 0.607 | -0.745 | 4.66E-01 | -2.439  | 1.025  | -2.379 | 2.86E-02 |
| LOC10050622 | 133.527   | 56.888  | 2.347  | 3.06E-02 | 0.937   | 0.787 | 1.191  | 2.49E-01 | -3.162  | 1.329  | -2.379 | 2.86E-02 |
| LOC10798506 | -40.037   | 20.730  | -1.931 | 6.93E-02 | -1.365  | 0.287 | -4.760 | 1.57E-04 | 1.152   | 0.484  | 2.379  | 2.86E-02 |
| MIR6500     | -73.786   | 36.324  | -2.031 | 5.73E-02 | -2.019  | 0.502 | -4.018 | 8.07E-04 | 2.019   | 0.849  | 2.379  | 2.87E-02 |
| TRBV19      | -36.893   | 18.162  | -2.031 | 5.73E-02 | -1.009  | 0.251 | -4.018 | 8.07E-04 | 1.009   | 0.424  | 2.379  | 2.87E-02 |
| MIR589      | -128.194  | 63.108  | -2.031 | 5.73E-02 | -3.507  | 0.873 | -4.018 | 8.07E-04 | 3.507   | 1.474  | 2.379  | 2.87E-02 |
| LOC10537392 | 105.814   | 40.358  | 2.622  | 1.73E-02 | 0.077   | 0.558 | 0.137  | 8.92E-01 | -2.243  | 0.943  | -2.378 | 2.87E-02 |
| PDE4DIPP7   | -45.555   | 19.430  | -2.345 | 3.07E-02 | -0.198  | 0.269 | -0.735 | 4.72E-01 | 1.079   | 0.454  | 2.378  | 2.87E-02 |
| AQP7        | 50.561    | 18.920  | 2.672  | 1.55E-02 | -0.126  | 0.262 | -0.483 | 6.35E-01 | -1.051  | 0.442  | -2.377 | 2.87E-02 |
| LOC10192813 | 152.343   | 58.491  | 2.605  | 1.79E-02 | 0.210   | 0.809 | 0.259  | 7.98E-01 | -3.246  | 1.367  | -2.376 | 2.88E-02 |
| C9orf62     | -107.185  | 43.053  | -2.490 | 2.28E-02 | -0.026  | 0.596 | -0.043 | 9.66E-01 | 2.390   | 1.006  | 2.375  | 2.88E-02 |
| OR8B3       | 77.442    | 36.740  | 2.108  | 4.93E-02 | 0.978   | 0.508 | 1.925  | 7.02E-02 | -2.039  | 0.858  | -2.375 | 2.89E-02 |
| LOC10798665 | -1181.542 | 485.044 | -2.436 | 2.55E-02 | -2.115  | 6.709 | -0.315 | 7.56E-01 | 26.898  | 11.333 | 2.373  | 2.90E-02 |
| TAMALIN.AS1 | -7.984    | 4.494   | -1.776 | 9.26E-02 | -0.351  | 0.062 | -5.641 | 2.37E-05 | 0.249   | 0.105  | 2.373  | 2.90E-02 |
| SNORD160    | 1048.571  | 392.244 | 2.673  | 1.55E-02 | -0.408  | 5.425 | -0.075 | 9.41E-01 | -21.744 | 9.165  | -2.373 | 2.90E-02 |
| LINC01186   | -37.252   | 19.119  | -1.948 | 6.71E-02 | -1.195  | 0.264 | -4.519 | 2.66E-04 | 1.060   | 0.447  | 2.372  | 2.90E-02 |
| LOC10798701 | 5.671     | 2.197   | 2.581  | 1.88E-02 | 0.009   | 0.030 | 0.304  | 7.64E-01 | -0.122  | 0.051  | -2.372 | 2.90E-02 |
| LOC10537413 | -109.044  | 53.359  | -2.044 | 5.59E-02 | -2.437  | 0.738 | -3.303 | 3.96E-03 | 2.956   | 1.247  | 2.371  | 2.91E-02 |
| LOC10537084 | -313.993  | 140.059 | -2.242 | 3.78E-02 | -2.468  | 1.937 | -1.274 | 2.19E-01 | 7.748   | 3.272  | 2.368  | 2.93E-02 |
| ZNF785      | 56.470    | 26.052  | 2.168  | 4.38E-02 | 0.599   | 0.360 | 1.662  | 1.14E-01 | -1.441  | 0.609  | -2.367 | 2.93E-02 |
| LOC10272474 | 63.242    | 24.914  | 2.538  | 2.06E-02 | -0.060  | 0.345 | -0.173 | 8.64E-01 | -1.378  | 0.582  | -2.367 | 2.93E-02 |
| MIR325      | 699.359   | 261.382 | 2.676  | 1.54E-02 | 0.000   | 3.615 | 0.000  | 1.00E+00 | -14.450 | 6.107  | -2.366 | 2.94E-02 |
| TSC22D1     | -111.673  | 44.073  | -2.534 | 2.08E-02 | 0.147   | 0.610 | 0.240  | 8.13E-01 | 2.435   | 1.030  | 2.365  | 2.95E-02 |
| LOC10537744 | 162.087   | 62.992  | 2.573  | 1.91E-02 | 0.246   | 0.871 | 0.282  | 7.81E-01 | -3.480  | 1.472  | -2.365 | 2.95E-02 |
| FAM71F1     | -167.699  | 70.229  | -2.388 | 2.81E-02 | -0.472  | 0.971 | -0.486 | 6.33E-01 | 3.880   | 1.641  | 2.364  | 2.95E-02 |

|             |          |         |        |          |        |       |        |          |         |       |        |          |
|-------------|----------|---------|--------|----------|--------|-------|--------|----------|---------|-------|--------|----------|
| LOC284950   | -373.156 | 156.183 | -2.389 | 2.80E-02 | -0.764 | 2.160 | -0.354 | 7.28E-01 | 8.625   | 3.649 | 2.364  | 2.95E-02 |
| LOC10537849 | 400.421  | 165.469 | 2.420  | 2.63E-02 | 3.125  | 2.289 | 1.366  | 1.89E-01 | -9.138  | 3.866 | -2.364 | 2.95E-02 |
| PTPRQ       | 75.238   | 29.617  | 2.540  | 2.05E-02 | -0.052 | 0.410 | -0.126 | 9.01E-01 | -1.636  | 0.692 | -2.363 | 2.96E-02 |
| OR6C76      | -123.561 | 57.740  | -2.140 | 4.63E-02 | -2.010 | 0.799 | -2.516 | 2.16E-02 | 3.186   | 1.349 | 2.362  | 2.97E-02 |
| DENND6A.DT  | -89.764  | 37.989  | -2.363 | 2.96E-02 | -0.795 | 0.525 | -1.513 | 1.48E-01 | 2.096   | 0.888 | 2.361  | 2.97E-02 |
| LINC01052   | 275.547  | 96.107  | 2.867  | 1.02E-02 | -0.984 | 1.329 | -0.740 | 4.69E-01 | -5.302  | 2.246 | -2.361 | 2.97E-02 |
| TRBV11.2_1  | -76.436  | 39.238  | -1.948 | 6.72E-02 | -2.322 | 0.543 | -4.278 | 4.53E-04 | 2.164   | 0.917 | 2.360  | 2.98E-02 |
| OMP         | -126.683 | 56.462  | -2.244 | 3.77E-02 | -1.445 | 0.781 | -1.850 | 8.08E-02 | 3.113   | 1.319 | 2.359  | 2.98E-02 |
| PIWIL2      | 77.539   | 30.785  | 2.519  | 2.15E-02 | 0.300  | 0.426 | 0.706  | 4.89E-01 | -1.697  | 0.719 | -2.359 | 2.98E-02 |
| IMP3        | 74.620   | 31.623  | 2.360  | 2.98E-02 | 0.452  | 0.437 | 1.034  | 3.15E-01 | -1.743  | 0.739 | -2.359 | 2.98E-02 |
| CEBPB       | 71.920   | 28.587  | 2.516  | 2.16E-02 | 0.218  | 0.395 | 0.552  | 5.88E-01 | -1.576  | 0.668 | -2.359 | 2.98E-02 |
| MAP3K20     | 77.672   | 35.122  | 2.212  | 4.02E-02 | 0.668  | 0.486 | 1.376  | 1.86E-01 | -1.935  | 0.821 | -2.358 | 2.99E-02 |
| MIR4324     | 423.604  | 159.366 | 2.658  | 1.60E-02 | -0.207 | 2.204 | -0.094 | 9.26E-01 | -8.777  | 3.724 | -2.357 | 2.99E-02 |
| MUC15       | -161.871 | 67.862  | -2.385 | 2.83E-02 | -0.452 | 0.939 | -0.482 | 6.36E-01 | 3.736   | 1.586 | 2.356  | 3.00E-02 |
| FAM167A.AS  | 43.525   | 16.007  | 2.719  | 1.41E-02 | -0.080 | 0.221 | -0.360 | 7.23E-01 | -0.881  | 0.374 | -2.356 | 3.00E-02 |
| LOC10537643 | 170.235  | 65.758  | 2.589  | 1.85E-02 | 0.094  | 0.910 | 0.104  | 9.19E-01 | -3.619  | 1.536 | -2.355 | 3.01E-02 |
| LINC01525   | 179.791  | 65.956  | 2.726  | 1.39E-02 | -0.640 | 0.912 | -0.701 | 4.92E-01 | -3.627  | 1.541 | -2.354 | 3.01E-02 |
| LOC10537499 | 351.325  | 130.016 | 2.702  | 1.46E-02 | 0.530  | 1.798 | 0.294  | 7.72E-01 | -7.146  | 3.038 | -2.352 | 3.02E-02 |
| LINC02113   | 101.923  | 40.856  | 2.495  | 2.26E-02 | 0.270  | 0.565 | 0.478  | 6.38E-01 | -2.245  | 0.955 | -2.352 | 3.02E-02 |
| FAM74A3     | -49.545  | 23.759  | -2.085 | 5.15E-02 | -1.052 | 0.329 | -3.200 | 4.96E-03 | 1.305   | 0.555 | 2.352  | 3.03E-02 |
| RHO_1       | -2.874   | 1.219   | -2.359 | 2.99E-02 | -0.015 | 0.017 | -0.885 | 3.88E-01 | 0.067   | 0.028 | 2.348  | 3.05E-02 |
| RNU7.1      | 857.967  | 406.138 | 2.112  | 4.89E-02 | 13.103 | 5.618 | 2.332  | 3.15E-02 | -22.274 | 9.489 | -2.347 | 3.06E-02 |
| MOGAT2      | 96.082   | 44.611  | 2.154  | 4.51E-02 | 1.089  | 0.617 | 1.765  | 9.45E-02 | -2.446  | 1.042 | -2.347 | 3.06E-02 |
| GALNT5      | 86.916   | 39.157  | 2.220  | 3.95E-02 | 0.751  | 0.542 | 1.387  | 1.82E-01 | -2.146  | 0.915 | -2.346 | 3.06E-02 |
| LINC00260   | -331.130 | 143.080 | -2.314 | 3.27E-02 | -2.237 | 1.979 | -1.130 | 2.73E-01 | 7.838   | 3.343 | 2.345  | 3.07E-02 |
| CA5BP1      | 65.823   | 28.329  | 2.324  | 3.21E-02 | 0.487  | 0.392 | 1.243  | 2.30E-01 | -1.552  | 0.662 | -2.344 | 3.07E-02 |
| LOC10192799 | 70.874   | 27.520  | 2.575  | 1.91E-02 | 0.068  | 0.381 | 0.179  | 8.60E-01 | -1.507  | 0.643 | -2.344 | 3.07E-02 |
| LOC10798743 | 40.710   | 15.225  | 2.674  | 1.55E-02 | -0.103 | 0.211 | -0.489 | 6.31E-01 | -0.834  | 0.356 | -2.344 | 3.08E-02 |
| CRCT1       | 217.557  | 95.774  | 2.272  | 3.56E-02 | 2.254  | 1.325 | 1.701  | 1.06E-01 | -5.245  | 2.238 | -2.344 | 3.08E-02 |
| LOC10798579 | -19.078  | 10.002  | -1.907 | 7.25E-02 | -0.627 | 0.138 | -4.530 | 2.59E-04 | 0.548   | 0.234 | 2.343  | 3.08E-02 |
| LOC10537780 | 52.710   | 20.923  | 2.519  | 2.14E-02 | 0.112  | 0.289 | 0.387  | 7.03E-01 | -1.145  | 0.489 | -2.343 | 3.08E-02 |
| MIR5047     | 277.025  | 104.764 | 2.644  | 1.65E-02 | 0.158  | 1.449 | 0.109  | 9.14E-01 | -5.735  | 2.448 | -2.343 | 3.08E-02 |
| PRODH2      | -405.217 | 170.181 | -2.381 | 2.85E-02 | -1.090 | 2.354 | -0.463 | 6.49E-01 | 9.311   | 3.976 | 2.342  | 3.09E-02 |
| LOC10798540 | -194.099 | 79.855  | -2.431 | 2.58E-02 | -0.189 | 1.105 | -0.171 | 8.66E-01 | 4.366   | 1.866 | 2.340  | 3.10E-02 |
| LINC00924   | 145.447  | 58.606  | 2.482  | 2.32E-02 | 0.262  | 0.811 | 0.323  | 7.50E-01 | -3.202  | 1.369 | -2.338 | 3.11E-02 |
| MIR7156     | -259.451 | 130.150 | -1.993 | 6.16E-02 | -7.110 | 1.800 | -3.949 | 9.40E-04 | 7.110   | 3.041 | 2.338  | 3.11E-02 |
| LOC10537810 | 108.875  | 42.327  | 2.572  | 1.92E-02 | 0.011  | 0.585 | 0.019  | 9.85E-01 | -2.310  | 0.989 | -2.336 | 3.12E-02 |
| LOC10537383 | 137.827  | 66.204  | 2.082  | 5.19E-02 | 2.069  | 0.916 | 2.259  | 3.65E-02 | -3.614  | 1.547 | -2.336 | 3.12E-02 |
| LOC10050659 | -132.626 | 54.450  | -2.436 | 2.55E-02 | 0.044  | 0.753 | 0.059  | 9.54E-01 | 2.970   | 1.272 | 2.335  | 3.13E-02 |
| LOC10192719 | 91.375   | 36.692  | 2.490  | 2.28E-02 | 0.184  | 0.508 | 0.362  | 7.22E-01 | -2.001  | 0.857 | -2.335 | 3.14E-02 |
| LOC10798699 | -238.788 | 104.113 | -2.294 | 3.41E-02 | -1.929 | 1.440 | -1.339 | 1.97E-01 | 5.678   | 2.433 | 2.334  | 3.14E-02 |
| GJB6        | -270.372 | 108.605 | -2.489 | 2.28E-02 | -0.279 | 1.502 | -0.186 | 8.55E-01 | 5.920   | 2.538 | 2.333  | 3.14E-02 |
| FAM193A     | 75.012   | 32.302  | 2.322  | 3.21E-02 | 0.473  | 0.447 | 1.058  | 3.04E-01 | -1.761  | 0.755 | -2.333 | 3.15E-02 |
| NDUFA2      | -51.210  | 22.308  | -2.296 | 3.39E-02 | -0.597 | 0.309 | -1.935 | 6.89E-02 | 1.216   | 0.521 | 2.333  | 3.15E-02 |
| HNRNPAB     | -275.877 | 115.482 | -2.389 | 2.81E-02 | -0.750 | 1.597 | -0.469 | 6.44E-01 | 6.294   | 2.698 | 2.333  | 3.15E-02 |
| C1orf52     | 47.318   | 19.632  | 2.410  | 2.69E-02 | -0.049 | 0.272 | -0.181 | 8.59E-01 | -1.069  | 0.459 | -2.331 | 3.16E-02 |
| LINC01543   | -269.568 | 121.574 | -2.217 | 3.97E-02 | -1.192 | 1.682 | -0.709 | 4.87E-01 | 6.620   | 2.841 | 2.330  | 3.16E-02 |
| RCSD1       | 59.220   | 23.450  | 2.525  | 2.12E-02 | 0.073  | 0.324 | 0.225  | 8.24E-01 | -1.277  | 0.548 | -2.330 | 3.16E-02 |
| PPP1R2B     | -266.748 | 113.432 | -2.352 | 3.03E-02 | -0.406 | 1.569 | -0.259 | 7.99E-01 | 6.175   | 2.650 | 2.330  | 3.16E-02 |
| MIR6801     | 287.672  | 109.359 | 2.631  | 1.70E-02 | -0.188 | 1.513 | -0.125 | 9.02E-01 | -5.952  | 2.555 | -2.330 | 3.17E-02 |
| OR10P1      | -321.450 | 132.163 | -2.432 | 2.57E-02 | -0.259 | 1.828 | -0.142 | 8.89E-01 | 7.191   | 3.088 | 2.329  | 3.17E-02 |
| LOC10798490 | 167.193  | 66.224  | 2.525  | 2.12E-02 | 0.033  | 0.916 | 0.036  | 9.72E-01 | -3.602  | 1.547 | -2.328 | 3.18E-02 |
| LOC10192834 | -484.954 | 203.015 | -2.389 | 2.81E-02 | -0.586 | 2.808 | -0.209 | 8.37E-01 | 11.041  | 4.743 | 2.328  | 3.18E-02 |

|             |          |         |        |          |        |       |        |          |         |       |        |          |
|-------------|----------|---------|--------|----------|--------|-------|--------|----------|---------|-------|--------|----------|
| BTNL9       | 79.998   | 31.002  | 2.580  | 1.89E-02 | -0.106 | 0.429 | -0.246 | 8.08E-01 | -1.685  | 0.724 | -2.327 | 3.19E-02 |
| LOC10537583 | -184.471 | 78.721  | -2.343 | 3.08E-02 | -0.827 | 1.089 | -0.759 | 4.57E-01 | 4.278   | 1.839 | 2.326  | 3.19E-02 |
| RTL1        | -130.668 | 55.669  | -2.347 | 3.06E-02 | -0.262 | 0.770 | -0.340 | 7.38E-01 | 3.026   | 1.301 | 2.326  | 3.19E-02 |
| SLC44A3     | 137.071  | 55.813  | 2.456  | 2.44E-02 | 0.393  | 0.772 | 0.509  | 6.17E-01 | -3.031  | 1.304 | -2.324 | 3.20E-02 |
| LOC10537440 | -633.770 | 260.001 | -2.438 | 2.54E-02 | -0.122 | 3.596 | -0.034 | 9.73E-01 | 14.114  | 6.075 | 2.323  | 3.21E-02 |
| MIR1243     | 516.055  | 198.601 | 2.598  | 1.82E-02 | -0.241 | 2.747 | -0.088 | 9.31E-01 | -10.780 | 4.640 | -2.323 | 3.21E-02 |
| LOC10537569 | 179.759  | 70.339  | 2.556  | 1.99E-02 | 0.125  | 0.973 | 0.129  | 8.99E-01 | -3.818  | 1.643 | -2.323 | 3.21E-02 |
| SNORD115.1  | 551.247  | 209.078 | 2.637  | 1.68E-02 | -0.484 | 2.892 | -0.167 | 8.69E-01 | -11.348 | 4.885 | -2.323 | 3.21E-02 |
| MIR5705     | 507.891  | 192.634 | 2.637  | 1.68E-02 | -0.446 | 2.665 | -0.167 | 8.69E-01 | -10.456 | 4.501 | -2.323 | 3.21E-02 |
| SNORA8      | 120.255  | 45.035  | 2.670  | 1.56E-02 | -0.328 | 0.623 | -0.526 | 6.05E-01 | -2.443  | 1.052 | -2.322 | 3.22E-02 |
| LOC11226814 | 91.957   | 39.170  | 2.348  | 3.05E-02 | 0.348  | 0.542 | 0.642  | 5.29E-01 | -2.125  | 0.915 | -2.322 | 3.22E-02 |
| OR1B1       | 68.907   | 26.017  | 2.649  | 1.63E-02 | -0.302 | 0.360 | -0.839 | 4.12E-01 | -1.411  | 0.608 | -2.321 | 3.22E-02 |
| PELATON     | 129.398  | 49.479  | 2.615  | 1.75E-02 | -0.014 | 0.684 | -0.021 | 9.84E-01 | -2.683  | 1.156 | -2.320 | 3.23E-02 |
| CDK2AP1     | -289.603 | 120.510 | -2.403 | 2.73E-02 | -0.278 | 1.667 | -0.167 | 8.70E-01 | 6.526   | 2.816 | 2.318  | 3.24E-02 |
| TRPM2.AS    | 69.253   | 29.408  | 2.355  | 3.01E-02 | 0.328  | 0.407 | 0.807  | 4.30E-01 | -1.592  | 0.687 | -2.317 | 3.25E-02 |
| LOC11226824 | -128.002 | 53.057  | -2.413 | 2.67E-02 | -0.355 | 0.734 | -0.484 | 6.34E-01 | 2.871   | 1.240 | 2.316  | 3.25E-02 |
| LOC10537796 | 355.389  | 139.996 | 2.539  | 2.06E-02 | -0.021 | 1.936 | -0.011 | 9.92E-01 | -7.576  | 3.271 | -2.316 | 3.26E-02 |
| LOC10798663 | -335.293 | 137.755 | -2.434 | 2.56E-02 | 0.452  | 1.905 | 0.237  | 8.15E-01 | 7.448   | 3.219 | 2.314  | 3.27E-02 |
| MIR548S     | 503.849  | 191.697 | 2.628  | 1.71E-02 | -0.484 | 2.652 | -0.182 | 8.57E-01 | -10.362 | 4.479 | -2.314 | 3.27E-02 |
| MIR135A2    | 272.660  | 101.393 | 2.689  | 1.50E-02 | -0.726 | 1.402 | -0.518 | 6.11E-01 | -5.479  | 2.369 | -2.313 | 3.28E-02 |
| ZMYM3       | 48.248   | 20.311  | 2.375  | 2.88E-02 | 0.239  | 0.281 | 0.850  | 4.06E-01 | -1.097  | 0.475 | -2.312 | 3.28E-02 |
| ZNF812P     | -180.209 | 78.920  | -2.283 | 3.48E-02 | -1.347 | 1.092 | -1.234 | 2.33E-01 | 4.262   | 1.844 | 2.312  | 3.28E-02 |
| PARP6       | 112.964  | 45.485  | 2.484  | 2.31E-02 | 0.279  | 0.629 | 0.444  | 6.62E-01 | -2.456  | 1.063 | -2.311 | 3.29E-02 |
| LOC10192744 | -86.336  | 36.295  | -2.379 | 2.86E-02 | -0.379 | 0.502 | -0.755 | 4.60E-01 | 1.959   | 0.848 | 2.310  | 3.30E-02 |
| MIR548A1    | 81.131   | 29.224  | 2.776  | 1.25E-02 | -0.409 | 0.404 | -1.012 | 3.25E-01 | -1.576  | 0.683 | -2.309 | 3.30E-02 |
| GMPPA       | 112.578  | 47.432  | 2.373  | 2.90E-02 | 0.506  | 0.656 | 0.771  | 4.51E-01 | -2.558  | 1.108 | -2.309 | 3.31E-02 |
| ZNF487      | 105.088  | 43.097  | 2.438  | 2.53E-02 | 0.361  | 0.596 | 0.606  | 5.52E-01 | -2.324  | 1.007 | -2.308 | 3.31E-02 |
| LOC10537133 | 305.973  | 116.676 | 2.622  | 1.73E-02 | -0.272 | 1.614 | -0.169 | 8.68E-01 | -6.293  | 2.726 | -2.308 | 3.31E-02 |
| LOC10798675 | 14.351   | 5.679   | 2.527  | 2.11E-02 | 0.015  | 0.079 | 0.187  | 8.53E-01 | -0.306  | 0.133 | -2.308 | 3.31E-02 |
| LOC10250342 | 196.567  | 86.838  | 2.264  | 3.62E-02 | 1.401  | 1.201 | 1.167  | 2.59E-01 | -4.683  | 2.029 | -2.308 | 3.31E-02 |
| LINC01508   | -501.474 | 213.213 | -2.352 | 3.03E-02 | -1.302 | 2.949 | -0.441 | 6.64E-01 | 11.497  | 4.982 | 2.308  | 3.31E-02 |
| LOC10537074 | 127.534  | 56.118  | 2.273  | 3.55E-02 | 0.792  | 0.776 | 1.020  | 3.21E-01 | -3.025  | 1.311 | -2.307 | 3.31E-02 |
| OR7D2       | -268.891 | 112.725 | -2.385 | 2.83E-02 | -0.577 | 1.559 | -0.370 | 7.16E-01 | 6.074   | 2.634 | 2.306  | 3.32E-02 |
| ZNF92       | -126.264 | 54.408  | -2.321 | 3.22E-02 | -0.570 | 0.753 | -0.757 | 4.59E-01 | 2.931   | 1.271 | 2.305  | 3.33E-02 |
| FST         | -122.108 | 52.260  | -2.337 | 3.12E-02 | -0.078 | 0.723 | -0.108 | 9.15E-01 | 2.815   | 1.221 | 2.305  | 3.33E-02 |
| ZNF792      | -123.308 | 54.809  | -2.250 | 3.72E-02 | -0.611 | 0.758 | -0.806 | 4.31E-01 | 2.952   | 1.281 | 2.305  | 3.33E-02 |
| ATAD3B      | 41.758   | 20.922  | 1.996  | 6.13E-02 | 0.544  | 0.289 | 1.879  | 7.65E-02 | -1.127  | 0.489 | -2.305 | 3.33E-02 |
| LINC01126   | 105.685  | 40.972  | 2.579  | 1.89E-02 | -0.003 | 0.567 | -0.006 | 9.95E-01 | -2.206  | 0.957 | -2.305 | 3.33E-02 |
| SLC35G5     | 14.326   | 5.744   | 2.494  | 2.26E-02 | 0.029  | 0.079 | 0.363  | 7.21E-01 | -0.309  | 0.134 | -2.304 | 3.33E-02 |
| OTOGL       | -119.448 | 51.501  | -2.319 | 3.23E-02 | -0.189 | 0.712 | -0.266 | 7.94E-01 | 2.773   | 1.203 | 2.304  | 3.33E-02 |
| LOC10536983 | -74.878  | 39.708  | -1.886 | 7.56E-02 | -2.420 | 0.549 | -4.407 | 3.40E-04 | 2.138   | 0.928 | 2.304  | 3.34E-02 |
| PNMA6A      | -4.120   | 2.100   | -1.962 | 6.54E-02 | -0.113 | 0.029 | -3.892 | 1.07E-03 | 0.113   | 0.049 | 2.304  | 3.34E-02 |
| LOC10272370 | -43.773  | 21.839  | -2.004 | 6.03E-02 | -1.175 | 0.302 | -3.891 | 1.07E-03 | 1.175   | 0.510 | 2.304  | 3.34E-02 |
| MIR670      | -298.905 | 152.151 | -1.965 | 6.51E-02 | -8.504 | 2.105 | -4.041 | 7.67E-04 | 8.189   | 3.555 | 2.304  | 3.34E-02 |
| TPH2        | 86.886   | 35.916  | 2.419  | 2.64E-02 | 0.287  | 0.497 | 0.578  | 5.70E-01 | -1.933  | 0.839 | -2.303 | 3.34E-02 |
| SNORD45B    | -559.677 | 259.754 | -2.155 | 4.50E-02 | -7.734 | 3.593 | -2.153 | 4.52E-02 | 13.978  | 6.069 | 2.303  | 3.34E-02 |
| TMSB4X      | -75.466  | 38.426  | -1.964 | 6.52E-02 | -1.909 | 0.532 | -3.591 | 2.09E-03 | 2.067   | 0.898 | 2.302  | 3.35E-02 |
| TRI.AAT2.1  | -160.390 | 83.509  | -1.921 | 7.08E-02 | -4.905 | 1.155 | -4.247 | 4.85E-04 | 4.488   | 1.951 | 2.300  | 3.36E-02 |
| LOC10537484 | -87.519  | 43.929  | -1.992 | 6.17E-02 | -1.937 | 0.608 | -3.188 | 5.10E-03 | 2.361   | 1.026 | 2.300  | 3.36E-02 |
| LOC10537400 | 214.496  | 77.320  | 2.774  | 1.25E-02 | -1.255 | 1.069 | -1.174 | 2.56E-01 | -4.153  | 1.807 | -2.299 | 3.37E-02 |
| LINC00384   | -76.557  | 40.340  | -1.898 | 7.39E-02 | -2.085 | 0.558 | -3.737 | 1.51E-03 | 2.166   | 0.943 | 2.298  | 3.37E-02 |
| SNORA9      | 193.564  | 73.938  | 2.618  | 1.74E-02 | -0.128 | 1.023 | -0.125 | 9.02E-01 | -3.970  | 1.728 | -2.298 | 3.37E-02 |
| PRAMEF13    | 84.112   | 36.572  | 2.300  | 3.36E-02 | 0.542  | 0.506 | 1.072  | 2.98E-01 | -1.964  | 0.855 | -2.298 | 3.38E-02 |

|             |          |         |        |          |        |       |        |          |         |       |        |          |
|-------------|----------|---------|--------|----------|--------|-------|--------|----------|---------|-------|--------|----------|
| LINC00894   | -67.327  | 29.168  | -2.308 | 3.31E-02 | -0.272 | 0.403 | -0.675 | 5.08E-01 | 1.566   | 0.681 | 2.297  | 3.38E-02 |
| OARD1       | 76.970   | 35.780  | 2.151  | 4.53E-02 | 0.760  | 0.495 | 1.536  | 1.42E-01 | -1.920  | 0.836 | -2.297 | 3.38E-02 |
| LOC10537030 | -463.620 | 188.238 | -2.463 | 2.41E-02 | 0.043  | 2.604 | 0.017  | 9.87E-01 | 10.100  | 4.398 | 2.296  | 3.39E-02 |
| ZHX2        | -83.884  | 35.478  | -2.364 | 2.95E-02 | -0.307 | 0.491 | -0.625 | 5.40E-01 | 1.903   | 0.829 | 2.296  | 3.39E-02 |
| TRAPPC6B    | -144.328 | 61.439  | -2.349 | 3.04E-02 | -0.652 | 0.850 | -0.768 | 4.53E-01 | 3.295   | 1.436 | 2.295  | 3.39E-02 |
| TRV.CAC1.3  | 415.465  | 161.935 | 2.566  | 1.95E-02 | -0.177 | 2.240 | -0.079 | 9.38E-01 | -8.683  | 3.784 | -2.295 | 3.40E-02 |
| UTP6        | -105.582 | 46.909  | -2.251 | 3.71E-02 | -0.833 | 0.649 | -1.284 | 2.16E-01 | 2.514   | 1.096 | 2.293  | 3.41E-02 |
| PACS2       | 54.996   | 24.372  | 2.256  | 3.67E-02 | 0.294  | 0.337 | 0.872  | 3.95E-01 | -1.306  | 0.569 | -2.293 | 3.41E-02 |
| GSC         | 71.796   | 29.257  | 2.454  | 2.45E-02 | 0.093  | 0.405 | 0.230  | 8.20E-01 | -1.566  | 0.684 | -2.291 | 3.43E-02 |
| SBK1        | 54.669   | 21.737  | 2.515  | 2.16E-02 | -0.012 | 0.301 | -0.039 | 9.70E-01 | -1.163  | 0.508 | -2.290 | 3.43E-02 |
| PRM2        | 125.452  | 50.034  | 2.507  | 2.20E-02 | 0.000  | 0.692 | 0.000  | 1.00E+00 | -2.677  | 1.169 | -2.290 | 3.43E-02 |
| LOC10013228 | -7.026   | 3.505   | -2.004 | 6.03E-02 | -0.188 | 0.048 | -3.868 | 1.13E-03 | 0.188   | 0.082 | 2.290  | 3.43E-02 |
| MIR567      | -77.964  | 38.896  | -2.004 | 6.03E-02 | -2.081 | 0.538 | -3.868 | 1.13E-03 | 2.081   | 0.909 | 2.290  | 3.43E-02 |
| SNORA74C.1  | -159.097 | 82.219  | -1.935 | 6.89E-02 | -4.794 | 1.137 | -4.215 | 5.20E-04 | 4.398   | 1.921 | 2.289  | 3.44E-02 |
| LOC10537729 | -215.553 | 90.121  | -2.392 | 2.79E-02 | -0.572 | 1.247 | -0.459 | 6.52E-01 | 4.817   | 2.106 | 2.288  | 3.45E-02 |
| LINC02421   | -203.282 | 88.552  | -2.296 | 3.39E-02 | -0.589 | 1.225 | -0.481 | 6.37E-01 | 4.733   | 2.069 | 2.288  | 3.45E-02 |
| LOC10537583 | 423.367  | 162.304 | 2.608  | 1.78E-02 | -0.027 | 2.245 | -0.012 | 9.91E-01 | -8.672  | 3.792 | -2.287 | 3.45E-02 |
| LOC10537151 | -28.306  | 15.066  | -1.879 | 7.66E-02 | -0.906 | 0.208 | -4.346 | 3.90E-04 | 0.805   | 0.352 | 2.286  | 3.46E-02 |
| TFAP2A.AS2  | 95.486   | 41.758  | 2.287  | 3.45E-02 | 0.389  | 0.578 | 0.673  | 5.10E-01 | -2.230  | 0.976 | -2.286 | 3.46E-02 |
| PSG8        | -318.412 | 133.891 | -2.378 | 2.87E-02 | -0.304 | 1.852 | -0.164 | 8.71E-01 | 7.150   | 3.128 | 2.285  | 3.46E-02 |
| SNORA50D    | -56.623  | 25.669  | -2.206 | 4.06E-02 | -0.605 | 0.355 | -1.705 | 1.05E-01 | 1.371   | 0.600 | 2.285  | 3.46E-02 |
| LOC10537161 | -270.683 | 117.267 | -2.308 | 3.31E-02 | -0.520 | 1.622 | -0.320 | 7.52E-01 | 6.256   | 2.740 | 2.283  | 3.48E-02 |
| NDUFAF6     | 39.178   | 14.351  | 2.730  | 1.37E-02 | -0.282 | 0.198 | -1.421 | 1.72E-01 | -0.765  | 0.335 | -2.283 | 3.48E-02 |
| OSCAR       | 35.910   | 13.856  | 2.592  | 1.84E-02 | -0.043 | 0.192 | -0.224 | 8.26E-01 | -0.739  | 0.324 | -2.282 | 3.49E-02 |
| ESCO1       | 82.828   | 34.829  | 2.378  | 2.87E-02 | 0.220  | 0.482 | 0.458  | 6.53E-01 | -1.855  | 0.814 | -2.280 | 3.50E-02 |
| MIR31       | 688.390  | 280.387 | 2.455  | 2.45E-02 | 1.268  | 3.878 | 0.327  | 7.47E-01 | -14.933 | 6.551 | -2.279 | 3.51E-02 |
| ATG4C       | 82.107   | 39.884  | 2.059  | 5.43E-02 | 0.829  | 0.552 | 1.504  | 1.50E-01 | -2.124  | 0.932 | -2.279 | 3.51E-02 |
| GIMAP5      | -3.050   | 1.549   | -1.968 | 6.46E-02 | -0.082 | 0.021 | -3.849 | 1.18E-03 | 0.082   | 0.036 | 2.279  | 3.51E-02 |
| DAAM2.AS1   | 88.492   | 38.925  | 2.273  | 3.55E-02 | 0.652  | 0.538 | 1.211  | 2.42E-01 | -2.072  | 0.909 | -2.278 | 3.51E-02 |
| PTCHD4      | 33.305   | 15.835  | 2.103  | 4.98E-02 | 0.265  | 0.219 | 1.211  | 2.41E-01 | -0.843  | 0.370 | -2.278 | 3.52E-02 |
| LOC10192911 | -256.604 | 104.980 | -2.444 | 2.50E-02 | 0.199  | 1.452 | 0.137  | 8.93E-01 | 5.587   | 2.453 | 2.278  | 3.52E-02 |
| LOC155060   | -140.211 | 63.366  | -2.213 | 4.01E-02 | -0.736 | 0.876 | -0.840 | 4.12E-01 | 3.372   | 1.481 | 2.278  | 3.52E-02 |
| LOC400682   | 51.830   | 20.636  | 2.512  | 2.18E-02 | -0.080 | 0.285 | -0.281 | 7.82E-01 | -1.098  | 0.482 | -2.278 | 3.52E-02 |
| LOC10537844 | -33.003  | 15.584  | -2.118 | 4.84E-02 | -0.690 | 0.216 | -3.199 | 4.97E-03 | 0.829   | 0.364 | 2.277  | 3.52E-02 |
| MIR4691     | -250.808 | 129.460 | -1.937 | 6.86E-02 | -6.886 | 1.791 | -3.845 | 1.19E-03 | 6.886   | 3.025 | 2.276  | 3.53E-02 |
| RAB34       | 139.615  | 55.538  | 2.514  | 2.17E-02 | 0.252  | 0.768 | 0.328  | 7.46E-01 | -2.954  | 1.298 | -2.276 | 3.53E-02 |
| LOC10192796 | 88.421   | 45.950  | 1.924  | 7.03E-02 | 1.468  | 0.636 | 2.309  | 3.30E-02 | -2.444  | 1.074 | -2.276 | 3.53E-02 |
| LOC10537831 | 259.054  | 112.888 | 2.295  | 3.40E-02 | 1.778  | 1.561 | 1.139  | 2.70E-01 | -6.000  | 2.638 | -2.275 | 3.54E-02 |
| MNAT1       | -172.609 | 75.444  | -2.288 | 3.45E-02 | -0.728 | 1.044 | -0.698 | 4.94E-01 | 4.010   | 1.763 | 2.275  | 3.54E-02 |
| LOC10798411 | 185.088  | 77.330  | 2.393  | 2.78E-02 | 0.104  | 1.070 | 0.098  | 9.23E-01 | -4.109  | 1.807 | -2.274 | 3.54E-02 |
| TRL.AAG4.1  | 634.170  | 256.895 | 2.469  | 2.38E-02 | 0.688  | 3.553 | 0.194  | 8.49E-01 | -13.650 | 6.002 | -2.274 | 3.54E-02 |
| NPSR1       | -162.355 | 72.139  | -2.251 | 3.72E-02 | -0.975 | 0.998 | -0.977 | 3.42E-01 | 3.832   | 1.686 | 2.273  | 3.55E-02 |
| GPR68       | 53.279   | 21.891  | 2.434  | 2.56E-02 | 0.041  | 0.303 | 0.135  | 8.94E-01 | -1.163  | 0.511 | -2.273 | 3.55E-02 |
| LOC10798602 | 61.910   | 23.623  | 2.621  | 1.73E-02 | -0.062 | 0.327 | -0.189 | 8.52E-01 | -1.255  | 0.552 | -2.273 | 3.55E-02 |
| CRHR2       | -71.147  | 32.989  | -2.157 | 4.48E-02 | -0.903 | 0.456 | -1.979 | 6.33E-02 | 1.752   | 0.771 | 2.273  | 3.55E-02 |
| GUCA2A      | 65.331   | 24.223  | 2.697  | 1.47E-02 | -0.243 | 0.335 | -0.724 | 4.78E-01 | -1.286  | 0.566 | -2.272 | 3.56E-02 |
| KISS1       | -65.151  | 30.478  | -2.138 | 4.65E-02 | -0.899 | 0.422 | -2.133 | 4.70E-02 | 1.618   | 0.712 | 2.272  | 3.56E-02 |
| ADAMTS16    | -92.834  | 43.012  | -2.158 | 4.47E-02 | -0.914 | 0.595 | -1.537 | 1.42E-01 | 2.282   | 1.005 | 2.271  | 3.57E-02 |
| LOC10537572 | 63.322   | 31.234  | 2.027  | 5.77E-02 | 0.819  | 0.432 | 1.896  | 7.42E-02 | -1.657  | 0.730 | -2.270 | 3.57E-02 |
| NARS1       | -164.103 | 69.927  | -2.347 | 3.06E-02 | -0.312 | 0.967 | -0.323 | 7.51E-01 | 3.709   | 1.634 | 2.270  | 3.57E-02 |
| LOC10536980 | 79.596   | 33.166  | 2.400  | 2.74E-02 | 0.156  | 0.459 | 0.339  | 7.39E-01 | -1.759  | 0.775 | -2.270 | 3.57E-02 |
| LOC10536991 | -380.435 | 160.711 | -2.367 | 2.93E-02 | -0.173 | 2.223 | -0.078 | 9.39E-01 | 8.519   | 3.755 | 2.269  | 3.58E-02 |
| AGAP1.IT1   | 64.438   | 23.610  | 2.729  | 1.38E-02 | -0.339 | 0.327 | -1.037 | 3.14E-01 | -1.251  | 0.552 | -2.268 | 3.59E-02 |

|             |          |         |        |          |        |       |        |          |         |       |        |          |
|-------------|----------|---------|--------|----------|--------|-------|--------|----------|---------|-------|--------|----------|
| LOC10798568 | -75.351  | 32.606  | -2.311 | 3.29E-02 | -0.119 | 0.451 | -0.264 | 7.95E-01 | 1.727   | 0.762 | 2.268  | 3.59E-02 |
| OR2A25      | -27.053  | 12.220  | -2.214 | 4.00E-02 | -0.202 | 0.169 | -1.197 | 2.47E-01 | 0.647   | 0.286 | 2.267  | 3.60E-02 |
| RPS19       | 67.245   | 31.718  | 2.120  | 4.82E-02 | 0.705  | 0.439 | 1.606  | 1.26E-01 | -1.679  | 0.741 | -2.266 | 3.60E-02 |
| FAM199X     | -100.515 | 43.011  | -2.337 | 3.12E-02 | -0.203 | 0.595 | -0.341 | 7.37E-01 | 2.276   | 1.005 | 2.265  | 3.61E-02 |
| LOC10537808 | 82.889   | 33.097  | 2.504  | 2.21E-02 | -0.163 | 0.458 | -0.357 | 7.25E-01 | -1.751  | 0.773 | -2.265 | 3.61E-02 |
| HMGAP7      | -130.418 | 57.249  | -2.278 | 3.51E-02 | -0.411 | 0.792 | -0.519 | 6.10E-01 | 3.029   | 1.338 | 2.265  | 3.61E-02 |
| MIR3923     | -94.988  | 48.095  | -1.975 | 6.38E-02 | -2.543 | 0.665 | -3.823 | 1.25E-03 | 2.543   | 1.124 | 2.263  | 3.62E-02 |
| TMEM210     | -717.153 | 303.659 | -2.362 | 2.97E-02 | -0.865 | 4.200 | -0.206 | 8.39E-01 | 16.056  | 7.095 | 2.263  | 3.62E-02 |
| LOC10537309 | 173.088  | 71.886  | 2.408  | 2.70E-02 | 0.103  | 0.994 | 0.104  | 9.18E-01 | -3.801  | 1.680 | -2.263 | 3.62E-02 |
| LILRB4_1    | 4.115    | 1.678   | 2.453  | 2.46E-02 | 0.006  | 0.023 | 0.277  | 7.85E-01 | -0.089  | 0.039 | -2.262 | 3.63E-02 |
| LOC10192809 | 56.336   | 24.464  | 2.303  | 3.34E-02 | 0.177  | 0.338 | 0.523  | 6.07E-01 | -1.293  | 0.572 | -2.261 | 3.63E-02 |
| MIR9900     | -279.831 | 132.347 | -2.114 | 4.87E-02 | -3.641 | 1.831 | -1.989 | 6.21E-02 | 6.989   | 3.092 | 2.260  | 3.64E-02 |
| LOC10798496 | 185.066  | 81.160  | 2.280  | 3.50E-02 | 0.704  | 1.123 | 0.627  | 5.39E-01 | -4.285  | 1.896 | -2.260 | 3.65E-02 |
| BLACAT1     | 61.819   | 23.150  | 2.670  | 1.56E-02 | -0.261 | 0.320 | -0.814 | 4.26E-01 | -1.222  | 0.541 | -2.260 | 3.65E-02 |
| LOC10192833 | 96.930   | 38.136  | 2.542  | 2.05E-02 | -0.425 | 0.527 | -0.805 | 4.31E-01 | -2.014  | 0.891 | -2.260 | 3.65E-02 |
| GBF1        | 83.756   | 34.435  | 2.432  | 2.57E-02 | 0.107  | 0.476 | 0.224  | 8.25E-01 | -1.818  | 0.805 | -2.260 | 3.65E-02 |
| UQCRC2      | 8.266    | 3.322   | 2.488  | 2.29E-02 | 0.010  | 0.046 | 0.221  | 8.28E-01 | -0.175  | 0.078 | -2.259 | 3.65E-02 |
| LOC10537128 | 142.000  | 54.896  | 2.587  | 1.86E-02 | -0.487 | 0.759 | -0.641 | 5.30E-01 | -2.897  | 1.283 | -2.258 | 3.66E-02 |
| FTHL18      | -46.897  | 23.732  | -1.976 | 6.37E-02 | -1.252 | 0.328 | -3.815 | 1.27E-03 | 1.252   | 0.554 | 2.258  | 3.66E-02 |
| SNORD114.1  | 459.779  | 181.109 | 2.539  | 2.06E-02 | -0.697 | 2.505 | -0.278 | 7.84E-01 | -9.554  | 4.232 | -2.258 | 3.66E-02 |
| ZFP90       | 69.557   | 32.705  | 2.127  | 4.75E-02 | 0.539  | 0.452 | 1.192  | 2.49E-01 | -1.725  | 0.764 | -2.257 | 3.66E-02 |
| SPRR1A      | 117.379  | 49.061  | 2.393  | 2.78E-02 | 0.156  | 0.679 | 0.229  | 8.21E-01 | -2.587  | 1.146 | -2.257 | 3.67E-02 |
| LOC10272490 | -113.457 | 49.381  | -2.298 | 3.38E-02 | -0.530 | 0.683 | -0.777 | 4.47E-01 | 2.604   | 1.154 | 2.257  | 3.67E-02 |
| MIR629      | -361.357 | 156.916 | -2.303 | 3.34E-02 | -1.279 | 2.170 | -0.589 | 5.63E-01 | 8.273   | 3.666 | 2.257  | 3.67E-02 |
| NPHP3.ACAD  | -3.588   | 1.767   | -2.030 | 5.74E-02 | -0.058 | 0.024 | -2.359 | 2.98E-02 | 0.093   | 0.041 | 2.254  | 3.69E-02 |
| CYP51A1.AS1 | -229.175 | 97.466  | -2.351 | 3.03E-02 | -0.332 | 1.348 | -0.246 | 8.08E-01 | 5.133   | 2.277 | 2.254  | 3.69E-02 |
| EML2        | 59.185   | 24.068  | 2.459  | 2.43E-02 | -0.022 | 0.333 | -0.066 | 9.48E-01 | -1.267  | 0.562 | -2.254 | 3.69E-02 |
| LOC10272430 | -335.719 | 150.108 | -2.237 | 3.82E-02 | -1.501 | 2.076 | -0.723 | 4.79E-01 | 7.904   | 3.507 | 2.254  | 3.69E-02 |
| LOC10798645 | 74.182   | 32.215  | 2.303  | 3.34E-02 | 0.341  | 0.446 | 0.765  | 4.54E-01 | -1.696  | 0.753 | -2.254 | 3.69E-02 |
| DELEC1      | 164.730  | 73.700  | 2.235  | 3.83E-02 | 1.151  | 1.019 | 1.129  | 2.74E-01 | -3.881  | 1.722 | -2.254 | 3.69E-02 |
| LINC00514   | 102.285  | 41.488  | 2.465  | 2.40E-02 | 0.188  | 0.574 | 0.328  | 7.47E-01 | -2.184  | 0.969 | -2.253 | 3.69E-02 |
| MBTD1       | 74.837   | 28.914  | 2.588  | 1.86E-02 | -0.068 | 0.400 | -0.170 | 8.67E-01 | -1.522  | 0.676 | -2.253 | 3.70E-02 |
| LOC10537232 | 20.068   | 7.911   | 2.537  | 2.07E-02 | -0.018 | 0.109 | -0.166 | 8.70E-01 | -0.416  | 0.185 | -2.253 | 3.70E-02 |
| LINC02586   | 148.770  | 83.611  | 1.779  | 9.21E-02 | 3.398  | 1.156 | 2.938  | 8.79E-03 | -4.400  | 1.954 | -2.253 | 3.70E-02 |
| LOC10798502 | -4.521   | 2.272   | -1.990 | 6.20E-02 | -0.120 | 0.031 | -3.805 | 1.30E-03 | 0.120   | 0.053 | 2.252  | 3.70E-02 |
| SLC20A1     | 64.128   | 30.512  | 2.102  | 4.99E-02 | 0.745  | 0.422 | 1.766  | 9.43E-02 | -1.606  | 0.713 | -2.252 | 3.70E-02 |
| TRP.AGG2.2  | 638.308  | 229.159 | 2.785  | 1.22E-02 | -4.416 | 3.170 | -1.393 | 1.80E-01 | -12.058 | 5.354 | -2.252 | 3.70E-02 |
| LOC10536970 | -173.353 | 76.849  | -2.256 | 3.68E-02 | -0.562 | 1.063 | -0.528 | 6.04E-01 | 4.043   | 1.796 | 2.251  | 3.71E-02 |
| LOC10798420 | -171.748 | 77.492  | -2.216 | 3.98E-02 | -1.314 | 1.072 | -1.226 | 2.36E-01 | 4.075   | 1.811 | 2.251  | 3.71E-02 |
| CCDC73      | -212.358 | 87.798  | -2.419 | 2.64E-02 | 0.090  | 1.214 | 0.074  | 9.42E-01 | 4.615   | 2.051 | 2.250  | 3.72E-02 |
| HARBI1      | 63.815   | 24.988  | 2.554  | 1.99E-02 | -0.219 | 0.346 | -0.632 | 5.35E-01 | -1.313  | 0.584 | -2.249 | 3.73E-02 |
| PPL         | 66.644   | 26.785  | 2.488  | 2.29E-02 | -0.065 | 0.370 | -0.177 | 8.62E-01 | -1.407  | 0.626 | -2.249 | 3.73E-02 |
| LOC10537228 | -394.937 | 173.675 | -2.274 | 3.54E-02 | -1.281 | 2.402 | -0.533 | 6.00E-01 | 9.124   | 4.058 | 2.249  | 3.73E-02 |
| MIR6764     | 362.718  | 141.241 | 2.568  | 1.94E-02 | -0.533 | 1.954 | -0.273 | 7.88E-01 | -7.420  | 3.300 | -2.248 | 3.73E-02 |
| UBE2D1      | -217.094 | 96.757  | -2.244 | 3.77E-02 | -1.450 | 1.338 | -1.083 | 2.93E-01 | 5.083   | 2.261 | 2.248  | 3.73E-02 |
| LOC10537023 | -127.799 | 62.933  | -2.031 | 5.73E-02 | -2.694 | 0.870 | -3.095 | 6.25E-03 | 3.305   | 1.470 | 2.248  | 3.74E-02 |
| SNAR.C1     | 216.803  | 98.626  | 2.198  | 4.13E-02 | 1.601  | 1.364 | 1.173  | 2.56E-01 | -5.180  | 2.304 | -2.248 | 3.74E-02 |
| GABRE       | 39.054   | 17.794  | 2.195  | 4.15E-02 | 0.311  | 0.246 | 1.265  | 2.22E-01 | -0.935  | 0.416 | -2.248 | 3.74E-02 |
| LINC00905   | -187.645 | 81.272  | -2.309 | 3.30E-02 | -0.351 | 1.124 | -0.312 | 7.58E-01 | 4.264   | 1.899 | 2.245  | 3.75E-02 |
| MIR3938     | 356.705  | 129.152 | 2.762  | 1.28E-02 | -2.311 | 1.786 | -1.294 | 2.12E-01 | -6.774  | 3.018 | -2.245 | 3.76E-02 |
| LOC11226817 | 15.181   | 6.219   | 2.441  | 2.52E-02 | 0.020  | 0.086 | 0.238  | 8.14E-01 | -0.326  | 0.145 | -2.245 | 3.76E-02 |
| SOBP        | 37.109   | 17.300  | 2.145  | 4.58E-02 | 0.151  | 0.239 | 0.631  | 5.36E-01 | -0.907  | 0.404 | -2.245 | 3.76E-02 |
| OR1N1       | 90.963   | 35.090  | 2.592  | 1.84E-02 | -0.282 | 0.485 | -0.581 | 5.68E-01 | -1.840  | 0.820 | -2.244 | 3.76E-02 |



|             |          |         |        |          |        |       |        |          |        |       |        |          |
|-------------|----------|---------|--------|----------|--------|-------|--------|----------|--------|-------|--------|----------|
| COX17       | 137.507  | 59.359  | 2.317  | 3.25E-02 | 0.732  | 0.821 | 0.891  | 3.85E-01 | -3.112 | 1.387 | -2.244 | 3.77E-02 |
| LOC1053780  | 45.581   | 19.026  | 2.396  | 2.77E-02 | -0.076 | 0.263 | -0.289 | 7.76E-01 | -0.997 | 0.445 | -2.244 | 3.77E-02 |
| CFLAR       | 32.381   | 15.293  | 2.117  | 4.84E-02 | 0.280  | 0.212 | 1.323  | 2.03E-01 | -0.801 | 0.357 | -2.243 | 3.77E-02 |
| RAD21L1     | 65.158   | 28.544  | 2.283  | 3.48E-02 | 0.039  | 0.395 | 0.098  | 9.23E-01 | -1.495 | 0.667 | -2.242 | 3.78E-02 |
| KIF5B       | 119.611  | 50.721  | 2.358  | 2.99E-02 | 0.100  | 0.702 | 0.142  | 8.89E-01 | -2.657 | 1.185 | -2.242 | 3.78E-02 |
| LOC1053785  | -66.176  | 32.294  | -2.049 | 5.53E-02 | -0.803 | 0.447 | -1.799 | 8.88E-02 | 1.691  | 0.755 | 2.242  | 3.78E-02 |
| RBL2        | -132.622 | 57.404  | -2.310 | 3.29E-02 | -0.415 | 0.794 | -0.522 | 6.08E-01 | 3.006  | 1.341 | 2.241  | 3.78E-02 |
| LOC1079860  | -318.341 | 140.230 | -2.270 | 3.57E-02 | -0.614 | 1.940 | -0.317 | 7.55E-01 | 7.341  | 3.276 | 2.241  | 3.79E-02 |
| LOC1053787  | 122.784  | 56.368  | 2.178  | 4.29E-02 | 1.044  | 0.780 | 1.339  | 1.97E-01 | -2.951 | 1.317 | -2.240 | 3.79E-02 |
| LOC1053773  | 135.965  | 56.986  | 2.386  | 2.82E-02 | 0.300  | 0.788 | 0.381  | 7.08E-01 | -2.982 | 1.331 | -2.239 | 3.80E-02 |
| PCDHB1      | 98.328   | 40.563  | 2.424  | 2.61E-02 | 0.033  | 0.561 | 0.059  | 9.54E-01 | -2.121 | 0.948 | -2.238 | 3.81E-02 |
| YPEL3       | 146.208  | 66.897  | 2.186  | 4.23E-02 | 1.462  | 0.925 | 1.580  | 1.31E-01 | -3.498 | 1.563 | -2.238 | 3.81E-02 |
| CETN1       | -330.980 | 145.672 | -2.272 | 3.56E-02 | -0.682 | 2.015 | -0.338 | 7.39E-01 | 7.617  | 3.404 | 2.238  | 3.81E-02 |
| CDK14       | 104.827  | 48.202  | 2.175  | 4.32E-02 | 0.592  | 0.667 | 0.888  | 3.86E-01 | -2.520 | 1.126 | -2.237 | 3.82E-02 |
| INS.IGF2    | 7.029    | 2.772   | 2.535  | 2.07E-02 | -0.009 | 0.038 | -0.239 | 8.14E-01 | -0.145 | 0.065 | -2.236 | 3.83E-02 |
| SNORD18C    | -181.683 | 93.730  | -1.938 | 6.84E-02 | -4.895 | 1.296 | -3.776 | 1.38E-03 | 4.895  | 2.190 | 2.235  | 3.83E-02 |
| ARRDC3.AS1  | -220.605 | 99.095  | -2.226 | 3.90E-02 | -0.539 | 1.371 | -0.393 | 6.99E-01 | 5.174  | 2.315 | 2.235  | 3.84E-02 |
| CZIB        | 113.439  | 50.601  | 2.242  | 3.78E-02 | 0.609  | 0.700 | 0.869  | 3.96E-01 | -2.642 | 1.182 | -2.235 | 3.84E-02 |
| LOC1053752  | -297.843 | 132.682 | -2.245 | 3.76E-02 | -0.769 | 1.835 | -0.419 | 6.80E-01 | 6.926  | 3.100 | 2.234  | 3.84E-02 |
| HEMK1       | 34.045   | 15.066  | 2.260  | 3.65E-02 | 0.120  | 0.208 | 0.576  | 5.72E-01 | -0.786 | 0.352 | -2.234 | 3.84E-02 |
| HLA.DQB1.AS | 148.906  | 61.082  | 2.438  | 2.54E-02 | 0.098  | 0.845 | 0.115  | 9.09E-01 | -3.188 | 1.427 | -2.234 | 3.84E-02 |
| FAM210A     | 55.750   | 23.621  | 2.360  | 2.98E-02 | 0.087  | 0.327 | 0.268  | 7.92E-01 | -1.233 | 0.552 | -2.233 | 3.85E-02 |
| SPDYE7P     | 119.035  | 46.680  | 2.550  | 2.01E-02 | -0.058 | 0.646 | -0.090 | 9.29E-01 | -2.435 | 1.091 | -2.233 | 3.85E-02 |
| LINC01886   | 94.023   | 39.271  | 2.394  | 2.78E-02 | 0.306  | 0.543 | 0.563  | 5.80E-01 | -2.048 | 0.918 | -2.232 | 3.85E-02 |
| LINC00280   | 40.708   | 17.875  | 2.277  | 3.52E-02 | 0.210  | 0.247 | 0.851  | 4.06E-01 | -0.932 | 0.418 | -2.232 | 3.86E-02 |
| MYO5B       | 44.271   | 18.661  | 2.372  | 2.90E-02 | -0.067 | 0.258 | -0.260 | 7.98E-01 | -0.973 | 0.436 | -2.232 | 3.86E-02 |
| SDR16C6P    | 248.175  | 99.395  | 2.497  | 2.25E-02 | -0.428 | 1.375 | -0.312 | 7.59E-01 | -5.183 | 2.322 | -2.232 | 3.86E-02 |
| GPR42       | 54.525   | 22.032  | 2.475  | 2.35E-02 | -0.101 | 0.305 | -0.331 | 7.45E-01 | -1.149 | 0.515 | -2.232 | 3.86E-02 |
| STX8        | -224.627 | 95.440  | -2.354 | 3.02E-02 | -0.462 | 1.320 | -0.350 | 7.30E-01 | 4.972  | 2.230 | 2.230  | 3.88E-02 |
| NOLC1       | 92.109   | 40.941  | 2.250  | 3.72E-02 | 0.226  | 0.566 | 0.400  | 6.94E-01 | -2.133 | 0.957 | -2.229 | 3.88E-02 |
| PRR23B      | -251.760 | 109.589 | -2.297 | 3.38E-02 | -0.007 | 1.516 | -0.005 | 9.96E-01 | 5.708  | 2.561 | 2.229  | 3.88E-02 |
| PATE1       | 113.670  | 59.043  | 1.925  | 7.02E-02 | 1.434  | 0.817 | 1.756  | 9.61E-02 | -3.074 | 1.380 | -2.229 | 3.88E-02 |
| LOC1079846  | -139.488 | 68.443  | -2.038 | 5.65E-02 | -2.463 | 0.947 | -2.602 | 1.80E-02 | 3.559  | 1.599 | 2.226  | 3.91E-02 |
| TLR6        | 71.619   | 31.453  | 2.277  | 3.52E-02 | 0.273  | 0.435 | 0.627  | 5.38E-01 | -1.635 | 0.735 | -2.225 | 3.91E-02 |
| LINC02042   | -217.720 | 98.488  | -2.211 | 4.02E-02 | -0.880 | 1.362 | -0.646 | 5.26E-01 | 5.119  | 2.301 | 2.225  | 3.91E-02 |
| FAM27E4     | 48.857   | 19.655  | 2.486  | 2.30E-02 | -0.052 | 0.272 | -0.190 | 8.52E-01 | -1.022 | 0.459 | -2.225 | 3.91E-02 |
| NEK6        | -167.641 | 74.158  | -2.261 | 3.64E-02 | -0.524 | 1.026 | -0.511 | 6.16E-01 | 3.854  | 1.733 | 2.224  | 3.92E-02 |
| LOC1053771  | -45.996  | 21.262  | -2.163 | 4.42E-02 | -0.380 | 0.294 | -1.291 | 2.13E-01 | 1.105  | 0.497 | 2.224  | 3.92E-02 |
| LOC1053784  | 52.604   | 23.111  | 2.276  | 3.53E-02 | 0.265  | 0.320 | 0.830  | 4.17E-01 | -1.201 | 0.540 | -2.223 | 3.92E-02 |
| NKAPL       | 146.504  | 61.341  | 2.388  | 2.81E-02 | 0.103  | 0.848 | 0.122  | 9.05E-01 | -3.186 | 1.433 | -2.223 | 3.93E-02 |
| ZNF66_1     | 48.749   | 23.364  | 2.086  | 5.14E-02 | 0.393  | 0.323 | 1.217  | 2.39E-01 | -1.213 | 0.546 | -2.223 | 3.93E-02 |
| LOC1019280  | 128.831  | 62.448  | 2.063  | 5.38E-02 | 1.608  | 0.864 | 1.861  | 7.91E-02 | -3.243 | 1.459 | -2.223 | 3.93E-02 |
| TSPY10      | -15.733  | 8.613   | -1.827 | 8.44E-02 | -0.516 | 0.119 | -4.333 | 4.01E-04 | 0.447  | 0.201 | 2.222  | 3.93E-02 |
| LOC1053722  | 53.163   | 23.376  | 2.274  | 3.54E-02 | 0.287  | 0.323 | 0.888  | 3.86E-01 | -1.214 | 0.546 | -2.222 | 3.94E-02 |
| LOC1079859  | -777.519 | 338.047 | -2.300 | 3.36E-02 | -1.097 | 4.676 | -0.235 | 8.17E-01 | 17.545 | 7.898 | 2.221  | 3.94E-02 |
| LOC1053720  | 243.784  | 106.985 | 2.279  | 3.51E-02 | 1.338  | 1.480 | 0.904  | 3.78E-01 | -5.552 | 2.500 | -2.221 | 3.94E-02 |
| LOC1027237  | -121.461 | 53.846  | -2.256 | 3.68E-02 | -0.486 | 0.745 | -0.652 | 5.23E-01 | 2.794  | 1.258 | 2.221  | 3.94E-02 |
| MOXD2P      | 37.505   | 15.759  | 2.380  | 2.86E-02 | 0.063  | 0.218 | 0.288  | 7.77E-01 | -0.818 | 0.368 | -2.221 | 3.94E-02 |
| HCP5B       | 59.827   | 22.514  | 2.657  | 1.60E-02 | -0.334 | 0.311 | -1.072 | 2.98E-01 | -1.168 | 0.526 | -2.221 | 3.95E-02 |
| EDARADD     | -107.754 | 49.663  | -2.170 | 4.37E-02 | -1.117 | 0.687 | -1.626 | 1.21E-01 | 2.576  | 1.160 | 2.220  | 3.95E-02 |
| MTFP1       | 85.185   | 40.132  | 2.123  | 4.79E-02 | 0.854  | 0.555 | 1.539  | 1.41E-01 | -2.081 | 0.938 | -2.220 | 3.95E-02 |
| B3GNTL1     | 22.976   | 8.994   | 2.554  | 1.99E-02 | -0.072 | 0.124 | -0.577 | 5.71E-01 | -0.466 | 0.210 | -2.217 | 3.97E-02 |
| LOC1079856  | -29.890  | 15.408  | -1.940 | 6.82E-02 | -0.736 | 0.213 | -3.452 | 2.84E-03 | 0.798  | 0.360 | 2.217  | 3.97E-02 |

|             |          |         |        |          |        |       |        |          |         |       |        |          |
|-------------|----------|---------|--------|----------|--------|-------|--------|----------|---------|-------|--------|----------|
| LOC10537544 | -161.646 | 71.180  | -2.271 | 3.57E-02 | -0.788 | 0.985 | -0.800 | 4.34E-01 | 3.686   | 1.663 | 2.216  | 3.98E-02 |
| TRABD       | -91.460  | 42.669  | -2.143 | 4.60E-02 | -0.813 | 0.590 | -1.378 | 1.85E-01 | 2.209   | 0.997 | 2.216  | 3.98E-02 |
| RPS27       | -104.747 | 53.818  | -1.946 | 6.74E-02 | -2.503 | 0.744 | -3.363 | 3.46E-03 | 2.786   | 1.257 | 2.216  | 3.98E-02 |
| LOC10192928 | -253.273 | 108.252 | -2.340 | 3.10E-02 | 0.002  | 1.497 | 0.001  | 9.99E-01 | 5.604   | 2.529 | 2.216  | 3.98E-02 |
| CLYBLAS1    | 178.643  | 71.997  | 2.481  | 2.32E-02 | -0.372 | 0.996 | -0.374 | 7.13E-01 | -3.725  | 1.682 | -2.215 | 3.99E-02 |
| ACAP3       | -58.813  | 25.762  | -2.283 | 3.48E-02 | 0.018  | 0.356 | 0.050  | 9.61E-01 | 1.332   | 0.602 | 2.213  | 4.00E-02 |
| LOC10537657 | 95.886   | 44.186  | 2.170  | 4.36E-02 | 0.625  | 0.611 | 1.023  | 3.20E-01 | -2.285  | 1.032 | -2.213 | 4.00E-02 |
| LOC10272438 | 56.139   | 22.860  | 2.456  | 2.45E-02 | -0.037 | 0.316 | -0.117 | 9.08E-01 | -1.182  | 0.534 | -2.213 | 4.01E-02 |
| SUMO1       | -106.717 | 46.596  | -2.290 | 3.43E-02 | -0.384 | 0.645 | -0.596 | 5.58E-01 | 2.409   | 1.089 | 2.213  | 4.01E-02 |
| LOC10537860 | -55.199  | 29.568  | -1.867 | 7.83E-02 | -1.755 | 0.409 | -4.290 | 4.40E-04 | 1.528   | 0.691 | 2.212  | 4.01E-02 |
| LINC01048   | -753.700 | 330.635 | -2.280 | 3.50E-02 | -1.284 | 4.573 | -0.281 | 7.82E-01 | 17.088  | 7.725 | 2.212  | 4.01E-02 |
| LINC02428   | 326.657  | 161.229 | 2.026  | 5.78E-02 | 3.693  | 2.230 | 1.656  | 1.15E-01 | -8.331  | 3.767 | -2.212 | 4.02E-02 |
| CICP24      | -15.303  | 7.815   | -1.958 | 6.59E-02 | -0.412 | 0.108 | -3.809 | 1.29E-03 | 0.404   | 0.183 | 2.211  | 4.02E-02 |
| ZNHIT6      | -108.045 | 47.665  | -2.267 | 3.60E-02 | -0.101 | 0.659 | -0.153 | 8.80E-01 | 2.462   | 1.114 | 2.210  | 4.03E-02 |
| STRIP1      | 59.760   | 26.440  | 2.260  | 3.64E-02 | 0.068  | 0.366 | 0.186  | 8.55E-01 | -1.364  | 0.618 | -2.208 | 4.04E-02 |
| LOC10536988 | -119.902 | 57.864  | -2.072 | 5.29E-02 | -1.308 | 0.800 | -1.635 | 1.19E-01 | 2.985   | 1.352 | 2.208  | 4.05E-02 |
| LOC649352   | 57.997   | 23.733  | 2.444  | 2.51E-02 | 0.074  | 0.328 | 0.227  | 8.23E-01 | -1.224  | 0.555 | -2.208 | 4.05E-02 |
| ADCYAP1     | -352.190 | 152.932 | -2.303 | 3.34E-02 | 0.340  | 2.115 | 0.161  | 8.74E-01 | 7.888   | 3.573 | 2.207  | 4.05E-02 |
| LOC10537620 | -89.182  | 42.795  | -2.084 | 5.17E-02 | -0.671 | 0.592 | -1.134 | 2.72E-01 | 2.207   | 1.000 | 2.207  | 4.05E-02 |
| LOC10536978 | -427.330 | 192.573 | -2.219 | 3.96E-02 | -1.808 | 2.664 | -0.679 | 5.06E-01 | 9.931   | 4.499 | 2.207  | 4.05E-02 |
| METTL7A     | 116.599  | 52.488  | 2.221  | 3.94E-02 | 0.996  | 0.726 | 1.371  | 1.87E-01 | -2.706  | 1.226 | -2.207 | 4.06E-02 |
| ZNF192P1    | -370.978 | 167.379 | -2.216 | 3.98E-02 | -0.787 | 2.315 | -0.340 | 7.38E-01 | 8.624   | 3.911 | 2.205  | 4.07E-02 |
| LINC02608   | -289.620 | 135.748 | -2.134 | 4.69E-02 | -1.784 | 1.878 | -0.950 | 3.55E-01 | 6.994   | 3.172 | 2.205  | 4.07E-02 |
| LOC10537766 | -603.623 | 273.766 | -2.205 | 4.07E-02 | -1.887 | 3.787 | -0.498 | 6.24E-01 | 14.101  | 6.396 | 2.205  | 4.07E-02 |
| LOC10537162 | -108.823 | 49.024  | -2.220 | 3.95E-02 | -0.862 | 0.678 | -1.271 | 2.20E-01 | 2.524   | 1.145 | 2.204  | 4.08E-02 |
| LOC10798620 | 153.483  | 63.087  | 2.433  | 2.56E-02 | 0.192  | 0.873 | 0.220  | 8.29E-01 | -3.248  | 1.474 | -2.204 | 4.08E-02 |
| PRAMEF14    | 103.026  | 43.710  | 2.357  | 2.99E-02 | 0.154  | 0.605 | 0.255  | 8.02E-01 | -2.250  | 1.021 | -2.203 | 4.09E-02 |
| LOC729609   | 103.389  | 45.722  | 2.261  | 3.64E-02 | 0.762  | 0.632 | 1.204  | 2.44E-01 | -2.353  | 1.068 | -2.203 | 4.09E-02 |
| MIR4504     | 1001.165 | 387.159 | 2.586  | 1.86E-02 | -2.394 | 5.355 | -0.447 | 6.60E-01 | -19.924 | 9.046 | -2.203 | 4.09E-02 |
| LOC10537330 | 383.795  | 149.297 | 2.571  | 1.92E-02 | -0.197 | 2.065 | -0.095 | 9.25E-01 | -7.683  | 3.488 | -2.202 | 4.09E-02 |
| CSMD2       | 40.692   | 18.363  | 2.216  | 3.98E-02 | 0.195  | 0.254 | 0.768  | 4.53E-01 | -0.945  | 0.429 | -2.202 | 4.10E-02 |
| UBE3A       | -96.913  | 43.683  | -2.219 | 3.96E-02 | -0.344 | 0.604 | -0.569 | 5.76E-01 | 2.247   | 1.021 | 2.202  | 4.10E-02 |
| LOC10537318 | -121.252 | 55.529  | -2.184 | 4.25E-02 | -0.938 | 0.768 | -1.221 | 2.38E-01 | 2.856   | 1.297 | 2.201  | 4.10E-02 |
| LINC01840   | -53.728  | 28.560  | -1.881 | 7.62E-02 | -1.562 | 0.395 | -3.953 | 9.31E-04 | 1.468   | 0.667 | 2.200  | 4.11E-02 |
| KDM2B       | -125.743 | 56.659  | -2.219 | 3.96E-02 | -0.569 | 0.784 | -0.726 | 4.77E-01 | 2.912   | 1.324 | 2.200  | 4.11E-02 |
| LOC10798421 | -75.014  | 39.109  | -1.918 | 7.11E-02 | -1.836 | 0.541 | -3.394 | 3.23E-03 | 2.010   | 0.914 | 2.200  | 4.11E-02 |
| LOC10192897 | 65.983   | 39.826  | 1.657  | 1.15E-01 | 1.676  | 0.551 | 3.042  | 7.02E-03 | -2.047  | 0.931 | -2.200 | 4.11E-02 |
| OR14A16     | -126.919 | 57.075  | -2.224 | 3.92E-02 | -0.569 | 0.789 | -0.720 | 4.81E-01 | 2.931   | 1.334 | 2.198  | 4.13E-02 |
| HIKESHI     | -132.187 | 59.070  | -2.238 | 3.81E-02 | -0.444 | 0.817 | -0.544 | 5.93E-01 | 3.034   | 1.380 | 2.198  | 4.13E-02 |
| LOC10537811 | 157.524  | 63.105  | 2.496  | 2.25E-02 | -0.212 | 0.873 | -0.243 | 8.11E-01 | -3.241  | 1.474 | -2.198 | 4.13E-02 |
| TRQ.TTG1.1  | 153.695  | 61.571  | 2.496  | 2.25E-02 | -0.207 | 0.852 | -0.243 | 8.11E-01 | -3.162  | 1.439 | -2.198 | 4.13E-02 |
| LOC10536992 | -454.918 | 203.626 | -2.234 | 3.84E-02 | -0.757 | 2.817 | -0.269 | 7.91E-01 | 10.457  | 4.758 | 2.198  | 4.13E-02 |
| PRB1        | 42.296   | 19.092  | 2.215  | 3.99E-02 | 0.213  | 0.264 | 0.807  | 4.30E-01 | -0.980  | 0.446 | -2.197 | 4.13E-02 |
| TRE.CTC1.7  | 622.730  | 253.938 | 2.452  | 2.46E-02 | 0.339  | 3.512 | 0.096  | 9.24E-01 | -13.035 | 5.933 | -2.197 | 4.14E-02 |
| LOC10798515 | 162.200  | 72.905  | 2.225  | 3.91E-02 | 1.062  | 1.008 | 1.053  | 3.06E-01 | -3.738  | 1.703 | -2.195 | 4.16E-02 |
| RAB4A       | -164.594 | 70.168  | -2.346 | 3.06E-02 | -0.164 | 0.971 | -0.169 | 8.68E-01 | 3.597   | 1.639 | 2.194  | 4.16E-02 |
| LOC10798531 | -712.322 | 305.616 | -2.331 | 3.16E-02 | -0.055 | 4.227 | -0.013 | 9.90E-01 | 15.668  | 7.141 | 2.194  | 4.16E-02 |
| KRTAP7.1    | -84.455  | 39.992  | -2.112 | 4.89E-02 | -0.912 | 0.553 | -1.649 | 1.17E-01 | 2.050   | 0.934 | 2.194  | 4.16E-02 |
| FABP5       | -552.248 | 250.480 | -2.205 | 4.07E-02 | -2.694 | 3.465 | -0.778 | 4.47E-01 | 12.840  | 5.852 | 2.194  | 4.16E-02 |
| LRRC74B     | 91.862   | 38.562  | 2.382  | 2.84E-02 | -0.105 | 0.533 | -0.197 | 8.46E-01 | -1.977  | 0.901 | -2.194 | 4.16E-02 |
| LINC01849   | 77.071   | 35.602  | 2.165  | 4.41E-02 | 0.550  | 0.492 | 1.116  | 2.79E-01 | -1.825  | 0.832 | -2.194 | 4.16E-02 |
| TMX2.CTNND  | -3.505   | 1.885   | -1.859 | 7.94E-02 | -0.102 | 0.026 | -3.895 | 1.06E-03 | 0.097   | 0.044 | 2.194  | 4.16E-02 |
| MIR365B     | -81.394  | 56.556  | -1.439 | 1.67E-01 | -5.084 | 0.782 | -6.499 | 4.12E-06 | 2.899   | 1.321 | 2.194  | 4.16E-02 |

|             |          |         |        |          |        |       |        |          |         |       |        |          |
|-------------|----------|---------|--------|----------|--------|-------|--------|----------|---------|-------|--------|----------|
| LOC10537804 | 237.131  | 100.311 | 2.364  | 2.95E-02 | 1.046  | 1.388 | 0.754  | 4.61E-01 | -5.141  | 2.344 | -2.194 | 4.16E-02 |
| LOC10537286 | -184.736 | 82.255  | -2.246 | 3.75E-02 | -0.026 | 1.138 | -0.023 | 9.82E-01 | 4.215   | 1.922 | 2.193  | 4.17E-02 |
| LOC10537716 | 183.187  | 76.050  | 2.409  | 2.69E-02 | 0.188  | 1.052 | 0.179  | 8.60E-01 | -3.896  | 1.777 | -2.193 | 4.17E-02 |
| LOC10192899 | 127.063  | 50.852  | 2.499  | 2.24E-02 | -0.449 | 0.703 | -0.638 | 5.31E-01 | -2.604  | 1.188 | -2.192 | 4.18E-02 |
| LOC10798483 | -204.599 | 90.961  | -2.249 | 3.72E-02 | -0.746 | 1.258 | -0.593 | 5.60E-01 | 4.658   | 2.125 | 2.192  | 4.18E-02 |
| VASH1.AS1   | -16.109  | 8.611   | -1.871 | 7.77E-02 | -0.441 | 0.119 | -3.701 | 1.63E-03 | 0.441   | 0.201 | 2.191  | 4.18E-02 |
| LOC10798721 | -24.729  | 12.325  | -2.006 | 6.01E-02 | -0.358 | 0.170 | -2.102 | 4.99E-02 | 0.631   | 0.288 | 2.190  | 4.20E-02 |
| STX11       | 64.767   | 27.736  | 2.335  | 3.13E-02 | -0.033 | 0.384 | -0.087 | 9.32E-01 | -1.419  | 0.648 | -2.190 | 4.20E-02 |
| LINC01480   | -37.697  | 20.003  | -1.885 | 7.57E-02 | -1.023 | 0.277 | -3.698 | 1.65E-03 | 1.023   | 0.467 | 2.189  | 4.20E-02 |
| RIC1        | -112.742 | 50.165  | -2.247 | 3.74E-02 | -0.436 | 0.694 | -0.629 | 5.37E-01 | 2.566   | 1.172 | 2.189  | 4.20E-02 |
| TMEM225     | -243.815 | 112.029 | -2.176 | 4.31E-02 | -0.608 | 1.550 | -0.392 | 6.99E-01 | 5.729   | 2.618 | 2.189  | 4.21E-02 |
| LOC10537871 | -60.731  | 29.167  | -2.082 | 5.19E-02 | -0.643 | 0.403 | -1.594 | 1.28E-01 | 1.491   | 0.681 | 2.189  | 4.21E-02 |
| MIR1207     | 261.694  | 108.086 | 2.421  | 2.63E-02 | -0.052 | 1.495 | -0.035 | 9.73E-01 | -5.524  | 2.525 | -2.187 | 4.21E-02 |
| TMEM39B     | 77.820   | 38.942  | 1.998  | 6.10E-02 | 0.681  | 0.539 | 1.264  | 2.22E-01 | -1.990  | 0.910 | -2.187 | 4.21E-02 |
| RHOV        | 47.978   | 19.352  | 2.479  | 2.33E-02 | -0.109 | 0.268 | -0.406 | 6.89E-01 | -0.989  | 0.452 | -2.187 | 4.22E-02 |
| NBR1        | 109.531  | 50.821  | 2.155  | 4.49E-02 | 0.760  | 0.703 | 1.081  | 2.94E-01 | -2.596  | 1.187 | -2.186 | 4.23E-02 |
| OSMR.AS1    | 226.058  | 106.173 | 2.129  | 4.73E-02 | 1.776  | 1.469 | 1.210  | 2.42E-01 | -5.423  | 2.481 | -2.186 | 4.23E-02 |
| ERLEC1      | 85.543   | 37.761  | 2.265  | 3.61E-02 | 0.336  | 0.522 | 0.644  | 5.28E-01 | -1.928  | 0.882 | -2.186 | 4.23E-02 |
| LOC285762   | -161.952 | 70.703  | -2.291 | 3.43E-02 | -0.564 | 0.978 | -0.576 | 5.71E-01 | 3.611   | 1.652 | 2.186  | 4.23E-02 |
| CYTH2       | 45.690   | 24.013  | 1.903  | 7.32E-02 | 0.679  | 0.332 | 2.044  | 5.59E-02 | -1.226  | 0.561 | -2.185 | 4.23E-02 |
| THEG5       | -144.562 | 63.393  | -2.280 | 3.50E-02 | -0.309 | 0.877 | -0.352 | 7.29E-01 | 3.236   | 1.481 | 2.185  | 4.24E-02 |
| IGKV3D.25   | 157.296  | 80.081  | 1.964  | 6.51E-02 | 1.851  | 1.108 | 1.671  | 1.12E-01 | -4.088  | 1.871 | -2.185 | 4.24E-02 |
| LOC10537473 | -74.506  | 36.447  | -2.044 | 5.58E-02 | -0.584 | 0.504 | -1.159 | 2.61E-01 | 1.860   | 0.852 | 2.184  | 4.24E-02 |
| FRG2C       | 128.839  | 56.293  | 2.289  | 3.44E-02 | 0.350  | 0.779 | 0.450  | 6.58E-01 | -2.872  | 1.315 | -2.184 | 4.24E-02 |
| DEFA1B_1    | -77.436  | 36.009  | -2.150 | 4.54E-02 | -0.533 | 0.498 | -1.070 | 2.99E-01 | 1.837   | 0.841 | 2.184  | 4.24E-02 |
| KRTAP10.4   | -156.370 | 66.939  | -2.336 | 3.13E-02 | -0.250 | 0.926 | -0.270 | 7.90E-01 | 3.413   | 1.564 | 2.182  | 4.26E-02 |
| COL10A1     | 44.757   | 18.468  | 2.423  | 2.61E-02 | -0.270 | 0.255 | -1.056 | 3.05E-01 | -0.941  | 0.432 | -2.182 | 4.26E-02 |
| LOC10192846 | -105.442 | 47.919  | -2.200 | 4.11E-02 | -0.508 | 0.663 | -0.766 | 4.54E-01 | 2.441   | 1.120 | 2.180  | 4.27E-02 |
| LINC01208   | 252.220  | 99.559  | 2.533  | 2.08E-02 | -0.334 | 1.377 | -0.243 | 8.11E-01 | -5.071  | 2.326 | -2.180 | 4.28E-02 |
| KIRREL1     | -95.248  | 42.355  | -2.249 | 3.73E-02 | -0.392 | 0.586 | -0.669 | 5.12E-01 | 2.157   | 0.990 | 2.179  | 4.28E-02 |
| LINC01202   | -387.838 | 178.158 | -2.177 | 4.30E-02 | -1.344 | 2.464 | -0.545 | 5.92E-01 | 9.069   | 4.163 | 2.179  | 4.29E-02 |
| NAV2.AS5    | 102.563  | 38.620  | 2.656  | 1.61E-02 | -0.623 | 0.534 | -1.167 | 2.59E-01 | -1.966  | 0.902 | -2.179 | 4.29E-02 |
| LOC10537251 | 133.070  | 58.040  | 2.293  | 3.41E-02 | 0.588  | 0.803 | 0.732  | 4.73E-01 | -2.954  | 1.356 | -2.178 | 4.29E-02 |
| LOC10537703 | -44.555  | 25.985  | -1.715 | 1.04E-01 | -1.495 | 0.359 | -4.160 | 5.88E-04 | 1.322   | 0.607 | 2.177  | 4.30E-02 |
| LOC10537351 | 279.260  | 128.251 | 2.177  | 4.30E-02 | 1.788  | 1.774 | 1.008  | 3.27E-01 | -6.524  | 2.997 | -2.177 | 4.30E-02 |
| LINC01893   | 109.767  | 47.385  | 2.316  | 3.25E-02 | 0.297  | 0.655 | 0.453  | 6.56E-01 | -2.410  | 1.107 | -2.177 | 4.30E-02 |
| MIR4474     | -256.848 | 120.439 | -2.133 | 4.70E-02 | -2.240 | 1.666 | -1.344 | 1.96E-01 | 6.125   | 2.814 | 2.177  | 4.31E-02 |
| MS4A3_1     | -19.118  | 8.991   | -2.126 | 4.76E-02 | -0.146 | 0.124 | -1.177 | 2.54E-01 | 0.457   | 0.210 | 2.176  | 4.31E-02 |
| OBSCN.AS1   | -69.117  | 32.326  | -2.138 | 4.65E-02 | -0.694 | 0.447 | -1.553 | 1.38E-01 | 1.643   | 0.755 | 2.175  | 4.32E-02 |
| SEZ6L       | 76.686   | 33.924  | 2.261  | 3.64E-02 | 0.176  | 0.469 | 0.374  | 7.13E-01 | -1.724  | 0.793 | -2.175 | 4.32E-02 |
| LOC10537896 | 84.775   | 41.710  | 2.032  | 5.71E-02 | 0.542  | 0.577 | 0.939  | 3.60E-01 | -2.120  | 0.975 | -2.175 | 4.32E-02 |
| LOC10192721 | 155.517  | 66.583  | 2.336  | 3.13E-02 | 0.284  | 0.921 | 0.308  | 7.62E-01 | -3.384  | 1.556 | -2.175 | 4.32E-02 |
| MIR381      | 576.001  | 232.881 | 2.473  | 2.36E-02 | -0.433 | 3.221 | -0.135 | 8.94E-01 | -11.830 | 5.441 | -2.174 | 4.33E-02 |
| LOC10537943 | 61.614   | 24.839  | 2.481  | 2.32E-02 | -0.133 | 0.344 | -0.386 | 7.04E-01 | -1.262  | 0.580 | -2.174 | 4.33E-02 |
| MUCL1       | 265.874  | 114.592 | 2.320  | 3.23E-02 | 0.575  | 1.585 | 0.363  | 7.21E-01 | -5.818  | 2.677 | -2.173 | 4.34E-02 |
| LOC10537533 | 157.397  | 62.626  | 2.513  | 2.17E-02 | -0.328 | 0.866 | -0.378 | 7.10E-01 | -3.180  | 1.463 | -2.173 | 4.34E-02 |
| NANOS1      | -35.097  | 17.015  | -2.063 | 5.39E-02 | -0.489 | 0.235 | -2.078 | 5.23E-02 | 0.864   | 0.398 | 2.172  | 4.34E-02 |
| LOC10798436 | 103.088  | 48.960  | 2.106  | 4.95E-02 | 0.878  | 0.677 | 1.296  | 2.11E-01 | -2.485  | 1.144 | -2.172 | 4.34E-02 |
| CHPF        | 53.185   | 23.366  | 2.276  | 3.53E-02 | 0.169  | 0.323 | 0.523  | 6.07E-01 | -1.186  | 0.546 | -2.171 | 4.35E-02 |
| LOC10537940 | -259.859 | 119.340 | -2.177 | 4.30E-02 | -0.720 | 1.651 | -0.436 | 6.68E-01 | 6.055   | 2.788 | 2.171  | 4.35E-02 |
| TRP.TGG3.4  | -762.398 | 332.730 | -2.291 | 3.42E-02 | 0.236  | 4.602 | 0.051  | 9.60E-01 | 16.873  | 7.774 | 2.170  | 4.36E-02 |
| SNORA87     | -364.604 | 196.428 | -1.856 | 7.99E-02 | -8.207 | 2.717 | -3.021 | 7.35E-03 | 9.958   | 4.589 | 2.170  | 4.37E-02 |
| LOC10798455 | 101.541  | 45.914  | 2.212  | 4.02E-02 | 0.442  | 0.635 | 0.696  | 4.95E-01 | -2.327  | 1.073 | -2.169 | 4.37E-02 |

|             |           |          |        |          |        |        |        |          |         |        |        |          |
|-------------|-----------|----------|--------|----------|--------|--------|--------|----------|---------|--------|--------|----------|
| LOC10798421 | -141.807  | 60.068   | -2.361 | 2.97E-02 | 0.086  | 0.831  | 0.103  | 9.19E-01 | 3.045   | 1.403  | 2.169  | 4.37E-02 |
| LOC10798683 | -161.794  | 71.332   | -2.268 | 3.59E-02 | 0.020  | 0.987  | 0.020  | 9.84E-01 | 3.614   | 1.667  | 2.169  | 4.38E-02 |
| KRTAP20.4   | -191.787  | 98.359   | -1.950 | 6.69E-02 | -3.890 | 1.360  | -2.859 | 1.04E-02 | 4.983   | 2.298  | 2.168  | 4.38E-02 |
| MIR512.1    | -2398.940 | 1052.116 | -2.280 | 3.50E-02 | 0.594  | 14.553 | 0.041  | 9.68E-01 | 53.289  | 24.582 | 2.168  | 4.38E-02 |
| TRC.GCA16.1 | 502.407   | 197.725  | 2.541  | 2.05E-02 | -1.768 | 2.735  | -0.646 | 5.26E-01 | -10.014 | 4.620  | -2.168 | 4.38E-02 |
| MIR330      | 520.951   | 223.274  | 2.333  | 3.14E-02 | 0.986  | 3.088  | 0.319  | 7.53E-01 | -11.307 | 5.217  | -2.168 | 4.38E-02 |
| OR52E2      | 97.345    | 41.598   | 2.340  | 3.10E-02 | 0.124  | 0.575  | 0.216  | 8.32E-01 | -2.106  | 0.972  | -2.167 | 4.39E-02 |
| VPS37B      | 39.305    | 16.292   | 2.412  | 2.67E-02 | -0.082 | 0.225  | -0.365 | 7.19E-01 | -0.825  | 0.381  | -2.167 | 4.39E-02 |
| LOC10537696 | 83.289    | 34.303   | 2.428  | 2.59E-02 | 0.167  | 0.474  | 0.352  | 7.29E-01 | -1.737  | 0.801  | -2.167 | 4.39E-02 |
| BID         | 45.378    | 19.871   | 2.284  | 3.48E-02 | 0.030  | 0.275  | 0.109  | 9.14E-01 | -1.006  | 0.464  | -2.167 | 4.39E-02 |
| LOC10537161 | -388.711  | 173.689  | -2.238 | 3.81E-02 | -0.359 | 2.402  | -0.149 | 8.83E-01 | 8.791   | 4.058  | 2.166  | 4.40E-02 |
| NKX3.2      | 82.411    | 34.665   | 2.377  | 2.87E-02 | 0.039  | 0.479  | 0.081  | 9.36E-01 | -1.755  | 0.810  | -2.166 | 4.40E-02 |
| LOC10192901 | 99.318    | 42.119   | 2.358  | 2.99E-02 | 0.051  | 0.583  | 0.088  | 9.31E-01 | -2.131  | 0.984  | -2.165 | 4.40E-02 |
| FCHO2       | -83.406   | 39.560   | -2.108 | 4.93E-02 | -0.487 | 0.547  | -0.891 | 3.85E-01 | 2.001   | 0.924  | 2.165  | 4.41E-02 |
| MIR512.2    | -2057.274 | 901.257  | -2.283 | 3.48E-02 | 0.913  | 12.466 | 0.073  | 9.42E-01 | 45.589  | 21.058 | 2.165  | 4.41E-02 |
| LINC00693   | 76.564    | 31.202   | 2.454  | 2.46E-02 | -0.349 | 0.432  | -0.808 | 4.30E-01 | -1.578  | 0.729  | -2.164 | 4.41E-02 |
| LOC10192900 | -53.801   | 28.033   | -1.919 | 7.10E-02 | -1.100 | 0.388  | -2.837 | 1.09E-02 | 1.417   | 0.655  | 2.164  | 4.42E-02 |
| H1.1        | -42.871   | 23.079   | -1.858 | 7.97E-02 | -1.155 | 0.319  | -3.619 | 1.96E-03 | 1.166   | 0.539  | 2.163  | 4.42E-02 |
| LOC10537139 | -590.591  | 264.865  | -2.230 | 3.87E-02 | -1.171 | 3.664  | -0.320 | 7.53E-01 | 13.385  | 6.188  | 2.163  | 4.43E-02 |
| LOC10798501 | -191.679  | 85.846   | -2.233 | 3.85E-02 | -0.284 | 1.187  | -0.239 | 8.14E-01 | 4.337   | 2.006  | 2.162  | 4.43E-02 |
| LGR5        | -91.648   | 43.593   | -2.102 | 4.99E-02 | -0.454 | 0.603  | -0.752 | 4.62E-01 | 2.202   | 1.019  | 2.162  | 4.43E-02 |
| HSF2        | -247.469  | 112.049  | -2.209 | 4.04E-02 | -0.196 | 1.550  | -0.126 | 9.01E-01 | 5.659   | 2.618  | 2.161  | 4.44E-02 |
| LOC10537291 | 116.144   | 44.310   | 2.621  | 1.73E-02 | -0.522 | 0.613  | -0.851 | 4.06E-01 | -2.238  | 1.035  | -2.161 | 4.44E-02 |
| TGM2        | -97.025   | 46.188   | -2.101 | 5.00E-02 | -0.640 | 0.639  | -1.002 | 3.30E-01 | 2.332   | 1.079  | 2.161  | 4.44E-02 |
| LOC10537769 | -628.500  | 284.339  | -2.210 | 4.03E-02 | -1.208 | 3.933  | -0.307 | 7.62E-01 | 14.356  | 6.643  | 2.161  | 4.44E-02 |
| LOC10099670 | 3.940     | 1.851    | 2.129  | 4.74E-02 | 0.029  | 0.026  | 1.150  | 2.65E-01 | -0.093  | 0.043  | -2.160 | 4.45E-02 |
| GOLGA8T     | 5.777     | 2.340    | 2.468  | 2.38E-02 | -0.007 | 0.032  | -0.216 | 8.32E-01 | -0.118  | 0.055  | -2.159 | 4.46E-02 |
| LOC10537475 | 223.172   | 94.363   | 2.365  | 2.95E-02 | -0.117 | 1.305  | -0.090 | 9.29E-01 | -4.760  | 2.205  | -2.159 | 4.46E-02 |
| MIR3936     | -713.718  | 332.431  | -2.147 | 4.57E-02 | -2.886 | 4.598  | -0.628 | 5.38E-01 | 16.770  | 7.767  | 2.159  | 4.46E-02 |
| LOC10537689 | -483.169  | 214.531  | -2.252 | 3.70E-02 | -0.604 | 2.967  | -0.203 | 8.41E-01 | 10.817  | 5.012  | 2.158  | 4.47E-02 |
| OR2J1       | -1.964    | 1.067    | -1.841 | 8.22E-02 | -0.045 | 0.015  | -3.070 | 6.60E-03 | 0.054   | 0.025  | 2.158  | 4.47E-02 |
| SNTG2.AS1   | -57.584   | 32.022   | -1.798 | 8.89E-02 | -1.778 | 0.443  | -4.015 | 8.12E-04 | 1.614   | 0.748  | 2.157  | 4.47E-02 |
| SHISA7      | 49.179    | 19.414   | 2.533  | 2.08E-02 | -0.168 | 0.269  | -0.625 | 5.40E-01 | -0.979  | 0.454  | -2.157 | 4.47E-02 |
| TENM2       | -85.773   | 40.372   | -2.125 | 4.77E-02 | -0.275 | 0.558  | -0.492 | 6.29E-01 | 2.035   | 0.943  | 2.157  | 4.48E-02 |
| MIR3177     | 544.136   | 222.542  | 2.445  | 2.50E-02 | -0.993 | 3.078  | -0.323 | 7.51E-01 | -11.216 | 5.200  | -2.157 | 4.48E-02 |
| LOC10537272 | -78.248   | 39.691   | -1.971 | 6.42E-02 | -1.066 | 0.549  | -1.942 | 6.79E-02 | 2.000   | 0.927  | 2.157  | 4.48E-02 |
| ADIG        | -61.094   | 32.127   | -1.902 | 7.33E-02 | -1.552 | 0.444  | -3.494 | 2.59E-03 | 1.619   | 0.751  | 2.157  | 4.48E-02 |
| LOC644090   | -185.356  | 83.489   | -2.220 | 3.95E-02 | -0.195 | 1.155  | -0.169 | 8.68E-01 | 4.207   | 1.951  | 2.157  | 4.48E-02 |
| LOC10537411 | 125.050   | 57.176   | 2.187  | 4.22E-02 | 0.592  | 0.791  | 0.749  | 4.64E-01 | -2.881  | 1.336  | -2.156 | 4.48E-02 |
| LOC10272408 | -148.832  | 68.165   | -2.183 | 4.25E-02 | -0.218 | 0.943  | -0.232 | 8.19E-01 | 3.434   | 1.593  | 2.156  | 4.49E-02 |
| SNORA101A   | -143.604  | 78.960   | -1.819 | 8.56E-02 | -4.231 | 1.092  | -3.874 | 1.11E-03 | 3.976   | 1.845  | 2.155  | 4.49E-02 |
| WIF1        | 113.344   | 53.638   | 2.113  | 4.88E-02 | 0.809  | 0.742  | 1.091  | 2.90E-01 | -2.701  | 1.253  | -2.155 | 4.49E-02 |
| LOC10536996 | -163.126  | 85.698   | -1.903 | 7.31E-02 | -3.175 | 1.185  | -2.679 | 1.53E-02 | 4.314   | 2.002  | 2.155  | 4.50E-02 |
| BAG5        | 66.632    | 30.862   | 2.159  | 4.46E-02 | 0.348  | 0.427  | 0.815  | 4.26E-01 | -1.554  | 0.721  | -2.154 | 4.50E-02 |
| LOC10798513 | 42.251    | 16.960   | 2.491  | 2.27E-02 | -0.104 | 0.235  | -0.444 | 6.62E-01 | -0.854  | 0.396  | -2.154 | 4.50E-02 |
| LOC10798644 | 85.225    | 33.705   | 2.529  | 2.10E-02 | -0.124 | 0.466  | -0.265 | 7.94E-01 | -1.696  | 0.788  | -2.154 | 4.50E-02 |
| LOC11226811 | 167.377   | 73.981   | 2.262  | 3.63E-02 | 0.388  | 1.023  | 0.379  | 7.09E-01 | -3.723  | 1.729  | -2.154 | 4.50E-02 |
| FAM20B      | 58.336    | 32.993   | 1.768  | 9.40E-02 | 1.014  | 0.456  | 2.222  | 3.94E-02 | -1.659  | 0.771  | -2.153 | 4.52E-02 |
| LOC10537068 | -126.677  | 62.367   | -2.031 | 5.73E-02 | -1.824 | 0.863  | -2.115 | 4.86E-02 | 3.136   | 1.457  | 2.152  | 4.52E-02 |
| LOC10537221 | 67.928    | 26.329   | 2.580  | 1.89E-02 | -0.361 | 0.364  | -0.990 | 3.35E-01 | -1.324  | 0.615  | -2.152 | 4.52E-02 |
| ZNF148      | -92.504   | 41.858   | -2.210 | 4.03E-02 | -0.182 | 0.579  | -0.315 | 7.56E-01 | 2.104   | 0.978  | 2.152  | 4.52E-02 |
| C1QTNF3.AM  | -1.721    | 0.935    | -1.841 | 8.21E-02 | -0.047 | 0.013  | -3.635 | 1.90E-03 | 0.047   | 0.022  | 2.152  | 4.52E-02 |
| TRV.CAC7.1  | -85.139   | 46.243   | -1.841 | 8.21E-02 | -2.325 | 0.640  | -3.635 | 1.90E-03 | 2.325   | 1.080  | 2.152  | 4.52E-02 |

|             |           |         |        |          |        |        |        |          |         |        |        |          |
|-------------|-----------|---------|--------|----------|--------|--------|--------|----------|---------|--------|--------|----------|
| SEMA6A.AS1  | 155.119   | 65.958  | 2.352  | 3.03E-02 | 0.195  | 0.912  | 0.214  | 8.33E-01 | -3.315  | 1.541  | -2.151 | 4.53E-02 |
| ZC3H4       | -94.051   | 43.005  | -2.187 | 4.22E-02 | -0.213 | 0.595  | -0.358 | 7.24E-01 | 2.162   | 1.005  | 2.151  | 4.53E-02 |
| KRT34       | -2.804    | 1.702   | -1.648 | 1.17E-01 | -0.129 | 0.024  | -5.489 | 3.27E-05 | 0.086   | 0.040  | 2.151  | 4.53E-02 |
| LOC10537890 | 211.645   | 93.171  | 2.272  | 3.56E-02 | 0.389  | 1.289  | 0.302  | 7.66E-01 | -4.681  | 2.177  | -2.150 | 4.54E-02 |
| LOC11226845 | 61.254    | 25.151  | 2.435  | 2.55E-02 | -0.005 | 0.348  | -0.015 | 9.88E-01 | -1.264  | 0.588  | -2.150 | 4.54E-02 |
| OR2AG1      | 59.746    | 27.916  | 2.140  | 4.63E-02 | 0.375  | 0.386  | 0.971  | 3.44E-01 | -1.402  | 0.652  | -2.149 | 4.55E-02 |
| LINC00863   | 50.755    | 21.396  | 2.372  | 2.90E-02 | -0.113 | 0.296  | -0.382 | 7.07E-01 | -1.074  | 0.500  | -2.149 | 4.55E-02 |
| HIC2        | 28.542    | 11.491  | 2.484  | 2.31E-02 | -0.194 | 0.159  | -1.221 | 2.38E-01 | -0.577  | 0.268  | -2.149 | 4.55E-02 |
| SLITRK4     | -76.280   | 34.144  | -2.234 | 3.84E-02 | -0.064 | 0.472  | -0.136 | 8.94E-01 | 1.714   | 0.798  | 2.149  | 4.55E-02 |
| LOC10537424 | 89.758    | 38.331  | 2.342  | 3.09E-02 | 0.043  | 0.530  | 0.080  | 9.37E-01 | -1.924  | 0.896  | -2.148 | 4.56E-02 |
| ANKRD34B    | -103.614  | 47.713  | -2.172 | 4.35E-02 | -0.387 | 0.660  | -0.587 | 5.65E-01 | 2.395   | 1.115  | 2.148  | 4.56E-02 |
| LINC02459   | 189.412   | 81.883  | 2.313  | 3.27E-02 | 0.031  | 1.133  | 0.027  | 9.79E-01 | -4.109  | 1.913  | -2.148 | 4.56E-02 |
| PLEKHG6     | 83.940    | 36.217  | 2.318  | 3.24E-02 | 0.271  | 0.501  | 0.542  | 5.95E-01 | -1.816  | 0.846  | -2.147 | 4.57E-02 |
| LOC10192934 | 94.272    | 51.932  | 1.815  | 8.62E-02 | 1.751  | 0.718  | 2.437  | 2.54E-02 | -2.604  | 1.213  | -2.146 | 4.58E-02 |
| PSD4        | 53.234    | 21.269  | 2.503  | 2.22E-02 | -0.060 | 0.294  | -0.202 | 8.42E-01 | -1.066  | 0.497  | -2.145 | 4.58E-02 |
| POMT1       | -82.658   | 38.848  | -2.128 | 4.74E-02 | -0.495 | 0.537  | -0.922 | 3.69E-01 | 1.947   | 0.908  | 2.145  | 4.58E-02 |
| RAB6C       | 99.255    | 44.422  | 2.234  | 3.84E-02 | 0.121  | 0.614  | 0.196  | 8.47E-01 | -2.225  | 1.038  | -2.144 | 4.59E-02 |
| MTUS2.AS1   | 120.779   | 65.859  | 1.834  | 8.33E-02 | 1.845  | 0.911  | 2.025  | 5.79E-02 | -3.299  | 1.539  | -2.144 | 4.59E-02 |
| SPAG17      | 84.257    | 37.654  | 2.238  | 3.81E-02 | 0.217  | 0.521  | 0.417  | 6.82E-01 | -1.886  | 0.880  | -2.144 | 4.60E-02 |
| LOC10798576 | -262.385  | 122.562 | -2.141 | 4.62E-02 | -1.262 | 1.695  | -0.745 | 4.66E-01 | 6.135   | 2.864  | 2.142  | 4.61E-02 |
| LOC10798581 | -63.994   | 38.306  | -1.671 | 1.12E-01 | -2.321 | 0.530  | -4.380 | 3.61E-04 | 1.917   | 0.895  | 2.142  | 4.61E-02 |
| PPM1H       | 82.076    | 41.391  | 1.983  | 6.28E-02 | 0.798  | 0.573  | 1.393  | 1.81E-01 | -2.071  | 0.967  | -2.141 | 4.62E-02 |
| SNORA24B    | -1970.862 | 887.575 | -2.221 | 3.95E-02 | 0.000  | 12.277 | 0.000  | 1.00E+00 | 44.406  | 20.738 | 2.141  | 4.62E-02 |
| KRTAP5.8    | 78.764    | 30.841  | 2.554  | 1.99E-02 | -0.374 | 0.427  | -0.877 | 3.92E-01 | -1.543  | 0.721  | -2.141 | 4.62E-02 |
| LOC10537451 | 183.354   | 70.109  | 2.615  | 1.75E-02 | -0.889 | 0.970  | -0.917 | 3.71E-01 | -3.507  | 1.638  | -2.141 | 4.62E-02 |
| DLX4        | 73.319    | 31.137  | 2.355  | 3.01E-02 | 0.195  | 0.431  | 0.453  | 6.56E-01 | -1.557  | 0.727  | -2.141 | 4.62E-02 |
| GALNT2      | 46.222    | 20.070  | 2.303  | 3.34E-02 | -0.110 | 0.278  | -0.397 | 6.96E-01 | -1.004  | 0.469  | -2.141 | 4.62E-02 |
| GPATCH1     | 107.626   | 50.108  | 2.148  | 4.56E-02 | 0.494  | 0.693  | 0.713  | 4.85E-01 | -2.506  | 1.171  | -2.140 | 4.63E-02 |
| LOC10537621 | 429.109   | 214.206 | 2.003  | 6.04E-02 | 4.554  | 2.963  | 1.537  | 1.42E-01 | -10.710 | 5.005  | -2.140 | 4.63E-02 |
| TEX46       | -80.762   | 38.488  | -2.098 | 5.03E-02 | -0.937 | 0.532  | -1.760 | 9.54E-02 | 1.923   | 0.899  | 2.139  | 4.64E-02 |
| LINC01832   | -144.557  | 71.788  | -2.014 | 5.92E-02 | -1.859 | 0.993  | -1.872 | 7.75E-02 | 3.586   | 1.677  | 2.138  | 4.65E-02 |
| ZMIZ1.AS1   | 158.628   | 74.635  | 2.125  | 4.77E-02 | 0.890  | 1.032  | 0.862  | 4.00E-01 | -3.728  | 1.744  | -2.138 | 4.65E-02 |
| AGAP13P     | 142.514   | 68.096  | 2.093  | 5.08E-02 | 1.196  | 0.942  | 1.270  | 2.20E-01 | -3.401  | 1.591  | -2.138 | 4.65E-02 |
| LOC10012831 | 79.576    | 41.633  | 1.911  | 7.20E-02 | 0.958  | 0.576  | 1.664  | 1.13E-01 | -2.079  | 0.973  | -2.138 | 4.65E-02 |
| TRBC2_1     | 36.373    | 14.737  | 2.468  | 2.38E-02 | -0.055 | 0.204  | -0.270 | 7.90E-01 | -0.736  | 0.344  | -2.137 | 4.66E-02 |
| PNMA8B      | 42.701    | 20.873  | 2.046  | 5.57E-02 | 0.424  | 0.289  | 1.470  | 1.59E-01 | -1.042  | 0.488  | -2.137 | 4.66E-02 |
| LINC01640   | 308.518   | 166.131 | 1.857  | 7.97E-02 | 5.218  | 2.298  | 2.271  | 3.57E-02 | -8.293  | 3.882  | -2.137 | 4.66E-02 |
| LOC10013096 | -31.056   | 15.298  | -2.030 | 5.74E-02 | -0.375 | 0.212  | -1.773 | 9.32E-02 | 0.764   | 0.357  | 2.136  | 4.66E-02 |
| LOC10537081 | -556.737  | 255.886 | -2.176 | 4.31E-02 | -1.540 | 3.539  | -0.435 | 6.69E-01 | 12.771  | 5.979  | 2.136  | 4.67E-02 |
| LINC01166   | 36.516    | 15.420  | 2.368  | 2.93E-02 | 0.011  | 0.213  | 0.052  | 9.59E-01 | -0.769  | 0.360  | -2.135 | 4.68E-02 |
| MRPL45P2    | -217.682  | 103.365 | -2.106 | 4.95E-02 | -1.006 | 1.430  | -0.704 | 4.91E-01 | 5.155   | 2.415  | 2.134  | 4.68E-02 |
| CIBAR1P2    | -346.429  | 157.283 | -2.203 | 4.09E-02 | -0.741 | 2.176  | -0.340 | 7.37E-01 | 7.844   | 3.675  | 2.134  | 4.68E-02 |
| SLC30A4     | 56.749    | 25.593  | 2.217  | 3.97E-02 | 0.164  | 0.354  | 0.463  | 6.49E-01 | -1.276  | 0.598  | -2.134 | 4.68E-02 |
| LOC10537458 | -153.611  | 80.701  | -1.903 | 7.31E-02 | -2.727 | 1.116  | -2.443 | 2.51E-02 | 4.023   | 1.886  | 2.134  | 4.69E-02 |
| FAM74A1     | 102.721   | 41.716  | 2.462  | 2.41E-02 | -0.257 | 0.577  | -0.445 | 6.62E-01 | -2.080  | 0.975  | -2.134 | 4.69E-02 |
| LOC10798676 | -102.989  | 49.767  | -2.069 | 5.32E-02 | -1.271 | 0.688  | -1.846 | 8.14E-02 | 2.480   | 1.163  | 2.133  | 4.69E-02 |
| LOC10272433 | 134.237   | 65.424  | 2.052  | 5.50E-02 | 1.130  | 0.905  | 1.248  | 2.28E-01 | -3.260  | 1.529  | -2.133 | 4.70E-02 |
| CRTC1       | 35.544    | 15.583  | 2.281  | 3.49E-02 | 0.142  | 0.216  | 0.660  | 5.17E-01 | -0.776  | 0.364  | -2.132 | 4.70E-02 |
| DEFB109B    | -32.330   | 19.277  | -1.677 | 1.11E-01 | -1.194 | 0.267  | -4.479 | 2.90E-04 | 0.960   | 0.450  | 2.132  | 4.71E-02 |
| DPRX        | 237.785   | 109.626 | 2.169  | 4.37E-02 | 1.316  | 1.516  | 0.868  | 3.97E-01 | -5.460  | 2.561  | -2.132 | 4.71E-02 |
| CSAG3       | 44.528    | 21.652  | 2.057  | 5.45E-02 | 0.214  | 0.299  | 0.715  | 4.84E-01 | -1.078  | 0.506  | -2.131 | 4.71E-02 |
| SDHAF4      | -399.486  | 177.472 | -2.251 | 3.71E-02 | 0.224  | 2.455  | 0.091  | 9.28E-01 | 8.835   | 4.147  | 2.131  | 4.72E-02 |
| LINC02051   | 183.115   | 100.477 | 1.822  | 8.50E-02 | 3.165  | 1.390  | 2.277  | 3.52E-02 | -5.001  | 2.348  | -2.130 | 4.72E-02 |

|             |          |         |        |          |        |       |        |          |         |       |        |          |
|-------------|----------|---------|--------|----------|--------|-------|--------|----------|---------|-------|--------|----------|
| CACNA1A     | -92.952  | 44.398  | -2.094 | 5.07E-02 | -0.299 | 0.614 | -0.488 | 6.32E-01 | 2.210   | 1.037 | 2.130  | 4.72E-02 |
| NDUFB1      | -80.909  | 42.870  | -1.887 | 7.54E-02 | -1.557 | 0.593 | -2.626 | 1.71E-02 | 2.133   | 1.002 | 2.130  | 4.72E-02 |
| LOC1122680  | 142.631  | 60.726  | 2.349  | 3.05E-02 | -0.212 | 0.840 | -0.252 | 8.04E-01 | -3.022  | 1.419 | -2.130 | 4.73E-02 |
| LOC1079868  | -425.493 | 189.679 | -2.243 | 3.77E-02 | 0.096  | 2.624 | 0.036  | 9.71E-01 | 9.437   | 4.432 | 2.129  | 4.73E-02 |
| CD200R1L.AS | -557.543 | 255.686 | -2.181 | 4.27E-02 | -1.429 | 3.537 | -0.404 | 6.91E-01 | 12.719  | 5.974 | 2.129  | 4.73E-02 |
| SOX5.AS1    | -189.018 | 93.087  | -2.031 | 5.73E-02 | -1.729 | 1.288 | -1.342 | 1.96E-01 | 4.630   | 2.175 | 2.129  | 4.74E-02 |
| PNOC        | -73.809  | 35.959  | -2.053 | 5.49E-02 | -0.550 | 0.497 | -1.106 | 2.83E-01 | 1.788   | 0.840 | 2.128  | 4.74E-02 |
| POU5F1P3    | -71.372  | 34.904  | -2.045 | 5.58E-02 | -0.691 | 0.483 | -1.431 | 1.70E-01 | 1.735   | 0.816 | 2.128  | 4.74E-02 |
| NME5        | -138.860 | 65.414  | -2.123 | 4.79E-02 | -0.490 | 0.905 | -0.542 | 5.95E-01 | 3.251   | 1.528 | 2.127  | 4.75E-02 |
| RNF139      | -210.338 | 94.111  | -2.235 | 3.83E-02 | -0.358 | 1.302 | -0.275 | 7.86E-01 | 4.677   | 2.199 | 2.127  | 4.75E-02 |
| LOC1053695  | 65.243   | 30.058  | 2.171  | 4.36E-02 | 0.221  | 0.416 | 0.531  | 6.02E-01 | -1.493  | 0.702 | -2.126 | 4.76E-02 |
| MIR4463     | -289.222 | 155.389 | -1.861 | 7.91E-02 | -7.715 | 2.149 | -3.590 | 2.10E-03 | 7.715   | 3.631 | 2.125  | 4.77E-02 |
| LOC1079842  | 74.201   | 33.639  | 2.206  | 4.06E-02 | 0.260  | 0.465 | 0.559  | 5.83E-01 | -1.670  | 0.786 | -2.124 | 4.77E-02 |
| LOC1053789  | 124.299  | 51.701  | 2.404  | 2.72E-02 | -0.106 | 0.715 | -0.148 | 8.84E-01 | -2.566  | 1.208 | -2.124 | 4.78E-02 |
| AP1B1       | 60.394   | 27.785  | 2.174  | 4.33E-02 | 0.274  | 0.384 | 0.714  | 4.84E-01 | -1.379  | 0.649 | -2.123 | 4.78E-02 |
| BCL2A1      | -617.193 | 280.099 | -2.203 | 4.08E-02 | -0.581 | 3.874 | -0.150 | 8.83E-01 | 13.896  | 6.544 | 2.123  | 4.78E-02 |
| ZRANB3      | 77.378   | 30.173  | 2.565  | 1.95E-02 | -0.494 | 0.417 | -1.185 | 2.52E-01 | -1.496  | 0.705 | -2.122 | 4.80E-02 |
| EEF2K       | -1.325   | 0.690   | -1.920 | 7.08E-02 | -0.034 | 0.010 | -3.584 | 2.12E-03 | 0.034   | 0.016 | 2.122  | 4.80E-02 |
| TM2D1       | 156.338  | 72.458  | 2.158  | 4.47E-02 | 0.772  | 1.002 | 0.770  | 4.51E-01 | -3.591  | 1.693 | -2.121 | 4.80E-02 |
| LOC1053785  | -294.625 | 134.211 | -2.195 | 4.15E-02 | -0.002 | 1.856 | -0.001 | 9.99E-01 | 6.650   | 3.136 | 2.121  | 4.81E-02 |
| SMIM30      | -503.356 | 227.158 | -2.216 | 3.98E-02 | -0.734 | 3.142 | -0.234 | 8.18E-01 | 11.255  | 5.307 | 2.121  | 4.81E-02 |
| MUC5AC      | 1.859    | 0.958   | 1.941  | 6.81E-02 | 0.027  | 0.013 | 2.002  | 6.05E-02 | -0.047  | 0.022 | -2.120 | 4.82E-02 |
| SCARNA26A   | 512.949  | 223.423 | 2.296  | 3.39E-02 | 0.685  | 3.090 | 0.222  | 8.27E-01 | -11.065 | 5.220 | -2.120 | 4.82E-02 |
| LOC1122679  | -0.638   | 0.311   | -2.052 | 5.50E-02 | -0.006 | 0.004 | -1.402 | 1.78E-01 | 0.015   | 0.007 | 2.120  | 4.82E-02 |
| MIR93       | -258.010 | 125.722 | -2.052 | 5.50E-02 | -2.438 | 1.739 | -1.402 | 1.78E-01 | 6.226   | 2.937 | 2.120  | 4.82E-02 |
| SNORA18     | -26.062  | 12.699  | -2.052 | 5.50E-02 | -0.246 | 0.176 | -1.402 | 1.78E-01 | 0.629   | 0.297 | 2.120  | 4.82E-02 |
| SMG1P2_1    | -2.455   | 1.196   | -2.052 | 5.50E-02 | -0.023 | 0.017 | -1.402 | 1.78E-01 | 0.059   | 0.028 | 2.120  | 4.82E-02 |
| HMGN3       | -266.575 | 125.662 | -2.121 | 4.80E-02 | -1.111 | 1.738 | -0.639 | 5.31E-01 | 6.223   | 2.936 | 2.120  | 4.82E-02 |
| LOC1027237  | -28.418  | 13.756  | -2.066 | 5.35E-02 | -0.218 | 0.190 | -1.144 | 2.68E-01 | 0.681   | 0.321 | 2.119  | 4.82E-02 |
| TADA1       | 89.626   | 35.777  | 2.505  | 2.21E-02 | -0.399 | 0.495 | -0.807 | 4.30E-01 | -1.772  | 0.836 | -2.119 | 4.82E-02 |
| SNORD71     | -475.928 | 239.541 | -1.987 | 6.24E-02 | -6.704 | 3.313 | -2.023 | 5.81E-02 | 11.859  | 5.597 | 2.119  | 4.83E-02 |
| LINC01187   | -471.941 | 214.222 | -2.203 | 4.09E-02 | -0.582 | 2.963 | -0.196 | 8.46E-01 | 10.604  | 5.005 | 2.119  | 4.83E-02 |
| MIR3125     | 52.544   | 23.124  | 2.272  | 3.56E-02 | 0.108  | 0.320 | 0.338  | 7.40E-01 | -1.145  | 0.540 | -2.118 | 4.83E-02 |
| MIR130B     | 149.943  | 65.988  | 2.272  | 3.56E-02 | 0.308  | 0.913 | 0.338  | 7.40E-01 | -3.266  | 1.542 | -2.118 | 4.83E-02 |
| LINC02203   | 4.214    | 1.855   | 2.272  | 3.56E-02 | 0.009  | 0.026 | 0.338  | 7.40E-01 | -0.092  | 0.043 | -2.118 | 4.83E-02 |
| LINC01621   | -32.936  | 21.305  | -1.546 | 1.40E-01 | -1.609 | 0.295 | -5.460 | 3.47E-05 | 1.054   | 0.498 | 2.118  | 4.83E-02 |
| LOC1019273  | 131.185  | 54.692  | 2.399  | 2.75E-02 | -0.017 | 0.756 | -0.023 | 9.82E-01 | -2.707  | 1.278 | -2.118 | 4.83E-02 |
| CDC42SE1    | 58.608   | 24.876  | 2.356  | 3.00E-02 | -0.128 | 0.344 | -0.372 | 7.15E-01 | -1.231  | 0.581 | -2.118 | 4.83E-02 |
| WDR93       | 69.943   | 31.157  | 2.245  | 3.76E-02 | 0.087  | 0.431 | 0.201  | 8.43E-01 | -1.541  | 0.728 | -2.117 | 4.84E-02 |
| TNNT3_1     | 28.940   | 11.974  | 2.417  | 2.65E-02 | -0.046 | 0.166 | -0.280 | 7.82E-01 | -0.592  | 0.280 | -2.117 | 4.84E-02 |
| MYADM       | 88.552   | 37.433  | 2.366  | 2.94E-02 | 0.058  | 0.518 | 0.112  | 9.12E-01 | -1.852  | 0.875 | -2.117 | 4.84E-02 |
| LOC1079853  | 181.372  | 71.434  | 2.539  | 2.06E-02 | -0.918 | 0.988 | -0.929 | 3.65E-01 | -3.532  | 1.669 | -2.116 | 4.85E-02 |
| DSCC1       | 68.494   | 30.391  | 2.254  | 3.69E-02 | -0.003 | 0.420 | -0.007 | 9.94E-01 | -1.503  | 0.710 | -2.116 | 4.85E-02 |
| MTHFD1      | -177.767 | 86.967  | -2.044 | 5.59E-02 | -1.350 | 1.203 | -1.123 | 2.76E-01 | 4.300   | 2.032 | 2.116  | 4.85E-02 |
| LINC00160   | 116.479  | 60.069  | 1.939  | 6.83E-02 | 1.352  | 0.831 | 1.627  | 1.21E-01 | -2.969  | 1.403 | -2.115 | 4.86E-02 |
| LOC1079845  | -119.701 | 58.178  | -2.057 | 5.44E-02 | -1.072 | 0.805 | -1.332 | 1.99E-01 | 2.875   | 1.359 | 2.115  | 4.86E-02 |
| PPIP5K1     | 67.602   | 33.886  | 1.995  | 6.14E-02 | 0.679  | 0.469 | 1.449  | 1.65E-01 | -1.674  | 0.792 | -2.115 | 4.87E-02 |
| HAVCR1P1    | 89.981   | 35.927  | 2.505  | 2.21E-02 | -0.501 | 0.497 | -1.009 | 3.26E-01 | -1.775  | 0.839 | -2.114 | 4.87E-02 |
| LINC01322   | 345.194  | 146.675 | 2.353  | 3.02E-02 | 0.787  | 2.029 | 0.388  | 7.03E-01 | -7.242  | 3.427 | -2.113 | 4.88E-02 |
| MARCHF10    | -95.000  | 42.973  | -2.211 | 4.02E-02 | -0.195 | 0.594 | -0.328 | 7.47E-01 | 2.122   | 1.004 | 2.113  | 4.88E-02 |
| LINC00609   | 138.295  | 60.201  | 2.297  | 3.38E-02 | -0.047 | 0.833 | -0.056 | 9.56E-01 | -2.972  | 1.407 | -2.113 | 4.89E-02 |
| ALOX12B     | 49.777   | 24.642  | 2.020  | 5.85E-02 | 0.438  | 0.341 | 1.286  | 2.15E-01 | -1.216  | 0.576 | -2.112 | 4.89E-02 |
| LOC1053746  | 187.855  | 83.195  | 2.258  | 3.66E-02 | 0.569  | 1.151 | 0.495  | 6.27E-01 | -4.106  | 1.944 | -2.112 | 4.89E-02 |

|             |          |         |        |          |        |       |        |          |         |        |        |          |
|-------------|----------|---------|--------|----------|--------|-------|--------|----------|---------|--------|--------|----------|
| MAN1B1      | 103.702  | 49.146  | 2.110  | 4.91E-02 | 0.448  | 0.680 | 0.659  | 5.18E-01 | -2.426  | 1.148  | -2.112 | 4.89E-02 |
| LOC10537395 | -472.014 | 211.991 | -2.227 | 3.90E-02 | -0.245 | 2.932 | -0.084 | 9.34E-01 | 10.463  | 4.953  | 2.112  | 4.89E-02 |
| LOC10798496 | 166.065  | 71.714  | 2.316  | 3.26E-02 | 0.050  | 0.992 | 0.051  | 9.60E-01 | -3.539  | 1.676  | -2.112 | 4.89E-02 |
| LOC10537805 | -391.824 | 183.181 | -2.139 | 4.64E-02 | -1.219 | 2.534 | -0.481 | 6.36E-01 | 9.039   | 4.280  | 2.112  | 4.89E-02 |
| GDF6        | 43.029   | 17.811  | 2.416  | 2.65E-02 | -0.207 | 0.246 | -0.841 | 4.11E-01 | -0.879  | 0.416  | -2.112 | 4.90E-02 |
| LINC02176   | 126.901  | 57.291  | 2.215  | 3.99E-02 | 0.579  | 0.792 | 0.730  | 4.75E-01 | -2.826  | 1.339  | -2.111 | 4.90E-02 |
| LOC10537369 | -137.351 | 66.383  | -2.069 | 5.32E-02 | -1.106 | 0.918 | -1.205 | 2.44E-01 | 3.275   | 1.551  | 2.111  | 4.90E-02 |
| RNF41       | -80.321  | 37.394  | -2.148 | 4.56E-02 | -0.139 | 0.517 | -0.268 | 7.92E-01 | 1.845   | 0.874  | 2.111  | 4.90E-02 |
| MED7        | -153.007 | 73.067  | -2.094 | 5.07E-02 | -1.010 | 1.011 | -1.000 | 3.31E-01 | 3.604   | 1.707  | 2.111  | 4.90E-02 |
| ATP6V0CP3   | 52.035   | 22.874  | 2.275  | 3.54E-02 | 0.106  | 0.316 | 0.336  | 7.41E-01 | -1.128  | 0.534  | -2.110 | 4.91E-02 |
| TRS.AGA5.1  | -455.224 | 208.679 | -2.181 | 4.27E-02 | -0.865 | 2.886 | -0.300 | 7.68E-01 | 10.288  | 4.876  | 2.110  | 4.91E-02 |
| LINC02197_1 | 7.829    | 3.260   | 2.401  | 2.73E-02 | -0.019 | 0.045 | -0.428 | 6.74E-01 | -0.161  | 0.076  | -2.110 | 4.91E-02 |
| AMOTL1      | -124.607 | 58.127  | -2.144 | 4.60E-02 | -0.161 | 0.804 | -0.201 | 8.43E-01 | 2.865   | 1.358  | 2.110  | 4.91E-02 |
| MIR580      | 631.580  | 259.010 | 2.438  | 2.53E-02 | -2.046 | 3.583 | -0.571 | 5.75E-01 | -12.761 | 6.052  | -2.109 | 4.93E-02 |
| LOC10537024 | -973.473 | 447.761 | -2.174 | 4.33E-02 | -1.670 | 6.193 | -0.270 | 7.90E-01 | 22.056  | 10.462 | 2.108  | 4.93E-02 |
| RRAGD       | 54.306   | 24.135  | 2.250  | 3.72E-02 | 0.032  | 0.334 | 0.096  | 9.25E-01 | -1.189  | 0.564  | -2.108 | 4.93E-02 |
| LOC10272435 | 165.830  | 71.181  | 2.330  | 3.17E-02 | -0.112 | 0.985 | -0.114 | 9.10E-01 | -3.505  | 1.663  | -2.108 | 4.93E-02 |
| FIBCD1      | 88.468   | 38.707  | 2.286  | 3.46E-02 | 0.256  | 0.535 | 0.479  | 6.38E-01 | -1.906  | 0.904  | -2.107 | 4.94E-02 |
| FMO6P       | -399.231 | 183.299 | -2.178 | 4.29E-02 | -0.626 | 2.535 | -0.247 | 8.08E-01 | 9.025   | 4.283  | 2.107  | 4.94E-02 |
| LOC10537764 | 185.944  | 81.078  | 2.293  | 3.41E-02 | 0.026  | 1.121 | 0.023  | 9.82E-01 | -3.991  | 1.894  | -2.107 | 4.94E-02 |
| LINC02712   | 252.511  | 107.166 | 2.356  | 3.00E-02 | -0.050 | 1.482 | -0.034 | 9.74E-01 | -5.275  | 2.504  | -2.107 | 4.94E-02 |
| ZSWIM9      | -133.881 | 64.786  | -2.067 | 5.35E-02 | -0.311 | 0.896 | -0.347 | 7.32E-01 | 3.189   | 1.514  | 2.106  | 4.95E-02 |
| TMEM190     | -125.095 | 59.817  | -2.091 | 5.10E-02 | -0.913 | 0.827 | -1.103 | 2.85E-01 | 2.943   | 1.398  | 2.106  | 4.95E-02 |
| LOC10537086 | 46.484   | 23.104  | 2.012  | 5.94E-02 | 0.243  | 0.320 | 0.761  | 4.57E-01 | -1.136  | 0.540  | -2.105 | 4.96E-02 |
| CPB2        | -108.008 | 52.627  | -2.052 | 5.50E-02 | -1.267 | 0.728 | -1.740 | 9.88E-02 | 2.588   | 1.230  | 2.105  | 4.96E-02 |
| PCAT7       | -123.856 | 58.145  | -2.130 | 4.72E-02 | -0.404 | 0.804 | -0.502 | 6.22E-01 | 2.859   | 1.359  | 2.104  | 4.97E-02 |
| RMDN2.AS1   | 112.755  | 46.890  | 2.405  | 2.72E-02 | -0.332 | 0.649 | -0.511 | 6.15E-01 | -2.305  | 1.096  | -2.104 | 4.97E-02 |
| TCP11       | 134.050  | 54.136  | 2.476  | 2.34E-02 | -0.531 | 0.749 | -0.709 | 4.88E-01 | -2.661  | 1.265  | -2.104 | 4.97E-02 |
| PLD2        | -254.839 | 117.336 | -2.172 | 4.35E-02 | 0.173  | 1.623 | 0.106  | 9.16E-01 | 5.765   | 2.742  | 2.103  | 4.98E-02 |
| LOC10042222 | 141.325  | 67.218  | 2.103  | 4.98E-02 | 1.233  | 0.930 | 1.327  | 2.01E-01 | -3.302  | 1.571  | -2.103 | 4.98E-02 |
| TDRKH.AS1   | -443.635 | 202.688 | -2.189 | 4.20E-02 | -0.892 | 2.804 | -0.318 | 7.54E-01 | 9.958   | 4.736  | 2.103  | 4.98E-02 |
| LOC10537619 | -188.590 | 91.731  | -2.056 | 5.46E-02 | -2.173 | 1.269 | -1.713 | 1.04E-01 | 4.506   | 2.143  | 2.103  | 4.98E-02 |
| HM13        | -179.397 | 83.286  | -2.154 | 4.50E-02 | -0.325 | 1.152 | -0.282 | 7.81E-01 | 4.090   | 1.946  | 2.102  | 4.99E-02 |
| LOC10798495 | -393.527 | 182.379 | -2.158 | 4.47E-02 | -0.489 | 2.523 | -0.194 | 8.49E-01 | 8.957   | 4.261  | 2.102  | 4.99E-02 |
| NOMO1_1     | 16.564   | 7.715   | 2.147  | 4.57E-02 | 0.076  | 0.107 | 0.715  | 4.84E-01 | -0.379  | 0.180  | -2.101 | 5.00E-02 |
| MIR378C     | -44.224  | 23.882  | -1.852 | 8.05E-02 | -1.172 | 0.330 | -3.549 | 2.29E-03 | 1.172   | 0.558  | 2.101  | 5.00E-02 |
