# Supplementary material for: RNA Sequencing of Intestinal Enterocytes Pre- and Post-Roux-en-Y Gastric Bypass Reveals Alteration in Gene Expression Related to Enterocyte Differentiation, Restitution, and Obesity with Regulation by Schlafen 12
Source: MDPI journal article supplement (doi:10.3390/cells11203283), 2022-10-18
Supplement: s1 [file s1]

|              | r.squared | adj.r.squared | sigma | statistic | p.value  |
|--------------|-----------|---------------|-------|-----------|----------|
| LOC107983998 | 7.81E-01  | 7.56E-01      | 1.77  | 32.07     | 3.09E-04 |
| LOC105378353 | 7.78E-01  | 7.54E-01      | 1.78  | 31.57     | 3.26E-04 |
| LINC00160    | 7.59E-01  | 7.32E-01      | 1.86  | 28.27     | 4.83E-04 |
| MS4A8        | 7.52E-01  | 7.24E-01      | 1.88  | 27.29     | 5.46E-04 |
| ZNF239       | 7.49E-01  | 7.21E-01      | 1.90  | 26.80     | 5.82E-04 |
| ADNP.AS1     | 7.48E-01  | 7.20E-01      | 1.90  | 26.67     | 5.92E-04 |
| PISRT1       | 7.36E-01  | 7.06E-01      | 1.94  | 25.07     | 7.32E-04 |
| LOC105374652 | 7.33E-01  | 7.03E-01      | 1.95  | 24.71     | 7.69E-04 |
| RPL10A       | 7.33E-01  | 7.03E-01      | 1.96  | 24.65     | 7.75E-04 |
| TBC1D29P     | 7.26E-01  | 6.95E-01      | 1.98  | 23.81     | 8.72E-04 |
| SIRPB3P      | 7.18E-01  | 6.86E-01      | 2.01  | 22.88     | 9.96E-04 |
| LINC00302    | 7.17E-01  | 6.85E-01      | 2.01  | 22.76     | 1.01E-03 |
| TRAV36DV7    | 7.16E-01  | 6.84E-01      | 2.02  | 22.66     | 1.03E-03 |
| LINC00605    | 7.14E-01  | 6.82E-01      | 2.02  | 22.46     | 1.06E-03 |
| MCEMP1       | 7.11E-01  | 6.79E-01      | 2.03  | 22.18     | 1.11E-03 |
| LOC105377416 | 7.08E-01  | 6.75E-01      | 2.05  | 21.79     | 1.17E-03 |
| LOC105370917 | 7.07E-01  | 6.74E-01      | 2.05  | 21.68     | 1.19E-03 |
| C17orf75     | 7.04E-01  | 6.71E-01      | 2.06  | 21.43     | 1.24E-03 |
| HLA.F.AS1_1  | 7.04E-01  | 6.71E-01      | 2.06  | 21.39     | 1.25E-03 |
| TMEM171      | 7.02E-01  | 6.69E-01      | 2.06  | 21.24     | 1.27E-03 |
| ANXA2P1      | 7.00E-01  | 6.67E-01      | 2.07  | 21.05     | 1.31E-03 |
| PSMD4        | 6.99E-01  | 6.66E-01      | 2.07  | 20.92     | 1.34E-03 |
| LOC105379350 | 6.99E-01  | 6.65E-01      | 2.08  | 20.89     | 1.35E-03 |
| MIR4303      | 6.98E-01  | 6.64E-01      | 2.08  | 20.76     | 1.37E-03 |
| SPRN         | 6.97E-01  | 6.64E-01      | 2.08  | 20.72     | 1.38E-03 |
| THEG         | 6.96E-01  | 6.62E-01      | 2.08  | 20.63     | 1.40E-03 |
| THUMPD3.AS1  | 6.95E-01  | 6.62E-01      | 2.09  | 20.55     | 1.42E-03 |
| ZSCAN10      | 6.95E-01  | 6.61E-01      | 2.09  | 20.47     | 1.44E-03 |
| MTRES1       | 6.94E-01  | 6.60E-01      | 2.09  | 20.44     | 1.44E-03 |
| DCLK1        | 6.93E-01  | 6.59E-01      | 2.10  | 20.32     | 1.47E-03 |
| LOC107987086 | 6.92E-01  | 6.57E-01      | 2.10  | 20.19     | 1.50E-03 |
| MIR1263      | 6.89E-01  | 6.55E-01      | 2.11  | 19.94     | 1.56E-03 |
| LINC02237    | 6.88E-01  | 6.54E-01      | 2.11  | 19.88     | 1.58E-03 |
| TPI1P3       | 6.88E-01  | 6.53E-01      | 2.11  | 19.82     | 1.60E-03 |
| DPM3         | 6.86E-01  | 6.51E-01      | 2.12  | 19.67     | 1.64E-03 |
| CTAG2        | 6.85E-01  | 6.50E-01      | 2.12  | 19.61     | 1.65E-03 |
| CDKN2A.DT    | 6.85E-01  | 6.50E-01      | 2.12  | 19.54     | 1.67E-03 |
| LOC105371729 | 6.84E-01  | 6.49E-01      | 2.13  | 19.48     | 1.69E-03 |
| TYMP         | 6.78E-01  | 6.43E-01      | 2.15  | 18.98     | 1.83E-03 |
| ICOSLG       | 6.78E-01  | 6.42E-01      | 2.15  | 18.95     | 1.84E-03 |

|              |          |          |      |       |          |
|--------------|----------|----------|------|-------|----------|
| LINC02311    | 6.77E-01 | 6.41E-01 | 2.15 | 18.86 | 1.87E-03 |
| LINC01050    | 6.75E-01 | 6.39E-01 | 2.15 | 18.73 | 1.91E-03 |
| GJA9.MYCBP   | 6.75E-01 | 6.39E-01 | 2.16 | 18.73 | 1.91E-03 |
| LOC100421746 | 6.75E-01 | 6.38E-01 | 2.16 | 18.65 | 1.94E-03 |
| C9orf135.DT  | 6.74E-01 | 6.38E-01 | 2.16 | 18.63 | 1.94E-03 |
| LOC105375318 | 6.74E-01 | 6.38E-01 | 2.16 | 18.60 | 1.95E-03 |
| AGR3         | 6.74E-01 | 6.37E-01 | 2.16 | 18.57 | 1.96E-03 |
| TRT.TGT4.1   | 6.73E-01 | 6.37E-01 | 2.16 | 18.53 | 1.98E-03 |
| MIR1294      | 6.73E-01 | 6.37E-01 | 2.16 | 18.53 | 1.98E-03 |
| NME1         | 6.73E-01 | 6.36E-01 | 2.16 | 18.49 | 1.99E-03 |
| LOC105375072 | 6.72E-01 | 6.35E-01 | 2.17 | 18.40 | 2.02E-03 |
| LOC105376184 | 6.70E-01 | 6.33E-01 | 2.17 | 18.28 | 2.06E-03 |
| LOC105370450 | 6.69E-01 | 6.32E-01 | 2.18 | 18.16 | 2.11E-03 |
| LINC01243    | 6.68E-01 | 6.31E-01 | 2.18 | 18.12 | 2.12E-03 |
| LINC00373    | 6.66E-01 | 6.28E-01 | 2.19 | 17.91 | 2.20E-03 |
| SCHIP1       | 6.65E-01 | 6.28E-01 | 2.19 | 17.86 | 2.22E-03 |
| LINC02692    | 6.64E-01 | 6.27E-01 | 2.19 | 17.82 | 2.24E-03 |
| LOC105374284 | 6.64E-01 | 6.27E-01 | 2.19 | 17.79 | 2.25E-03 |
| H2BC6        | 6.64E-01 | 6.26E-01 | 2.19 | 17.76 | 2.26E-03 |
| OR56B1       | 6.63E-01 | 6.25E-01 | 2.20 | 17.69 | 2.29E-03 |
| LINC02685    | 6.62E-01 | 6.24E-01 | 2.20 | 17.63 | 2.31E-03 |
| LINC01900    | 6.60E-01 | 6.23E-01 | 2.20 | 17.51 | 2.36E-03 |
| SEZ6L.AS1    | 6.59E-01 | 6.22E-01 | 2.21 | 17.42 | 2.40E-03 |
| TRDV2        | 6.59E-01 | 6.21E-01 | 2.21 | 17.40 | 2.41E-03 |
| LOC105373411 | 6.59E-01 | 6.21E-01 | 2.21 | 17.39 | 2.41E-03 |
| POU3F2       | 6.59E-01 | 6.21E-01 | 2.21 | 17.36 | 2.42E-03 |
| LOC105379007 | 6.58E-01 | 6.20E-01 | 2.21 | 17.28 | 2.46E-03 |
| LOC105377894 | 6.57E-01 | 6.19E-01 | 2.21 | 17.26 | 2.47E-03 |
| H2BC11       | 6.57E-01 | 6.19E-01 | 2.22 | 17.24 | 2.48E-03 |
| SNORD18B     | 6.56E-01 | 6.18E-01 | 2.22 | 17.15 | 2.52E-03 |
| LOC107987285 | 6.55E-01 | 6.17E-01 | 2.22 | 17.09 | 2.54E-03 |
| LOC105370643 | 6.54E-01 | 6.15E-01 | 2.23 | 17.00 | 2.59E-03 |
| LOC105371062 | 6.50E-01 | 6.11E-01 | 2.24 | 16.70 | 2.73E-03 |
| LOC105374733 | 6.49E-01 | 6.10E-01 | 2.24 | 16.67 | 2.74E-03 |
| LINC02176    | 6.48E-01 | 6.09E-01 | 2.24 | 16.60 | 2.78E-03 |
| UPK3A        | 6.48E-01 | 6.09E-01 | 2.25 | 16.54 | 2.81E-03 |
| LOC112268110 | 6.47E-01 | 6.08E-01 | 2.25 | 16.50 | 2.83E-03 |
| LOC101927756 | 6.46E-01 | 6.07E-01 | 2.25 | 16.45 | 2.86E-03 |
| SERPIND1     | 6.46E-01 | 6.07E-01 | 2.25 | 16.45 | 2.86E-03 |
| FAM98A       | 6.45E-01 | 6.06E-01 | 2.25 | 16.37 | 2.90E-03 |
| LOC105370255 | 6.45E-01 | 6.06E-01 | 2.25 | 16.36 | 2.91E-03 |

|                |          |          |      |       |          |
|----------------|----------|----------|------|-------|----------|
| OR5K1          | 6.44E-01 | 6.05E-01 | 2.26 | 16.31 | 2.93E-03 |
| MIR1912        | 6.43E-01 | 6.03E-01 | 2.26 | 16.20 | 3.00E-03 |
| TAS2R7         | 6.43E-01 | 6.03E-01 | 2.26 | 16.20 | 3.00E-03 |
| LOC112268014   | 6.43E-01 | 6.03E-01 | 2.26 | 16.20 | 3.00E-03 |
| NXNL1          | 6.43E-01 | 6.03E-01 | 2.26 | 16.19 | 3.00E-03 |
| LOC105379444   | 6.41E-01 | 6.01E-01 | 2.27 | 16.04 | 3.09E-03 |
| SLC47A2        | 6.40E-01 | 6.00E-01 | 2.27 | 16.03 | 3.09E-03 |
| LOC105377183   | 6.40E-01 | 6.00E-01 | 2.27 | 16.03 | 3.10E-03 |
| VAT1           | 6.39E-01 | 5.99E-01 | 2.27 | 15.95 | 3.14E-03 |
| ERG28          | 6.39E-01 | 5.99E-01 | 2.27 | 15.95 | 3.14E-03 |
| LOC107986716   | 6.39E-01 | 5.98E-01 | 2.27 | 15.90 | 3.17E-03 |
| ZNF451.AS1     | 6.38E-01 | 5.98E-01 | 2.28 | 15.85 | 3.20E-03 |
| GLDC           | 6.38E-01 | 5.97E-01 | 2.28 | 15.84 | 3.21E-03 |
| MED11          | 6.37E-01 | 5.97E-01 | 2.28 | 15.79 | 3.23E-03 |
| VIP            | 6.37E-01 | 5.96E-01 | 2.28 | 15.78 | 3.24E-03 |
| LOC100128398   | 6.37E-01 | 5.96E-01 | 2.28 | 15.77 | 3.25E-03 |
| FOXD3          | 6.36E-01 | 5.96E-01 | 2.28 | 15.74 | 3.27E-03 |
| FEZF2          | 6.36E-01 | 5.95E-01 | 2.28 | 15.71 | 3.28E-03 |
| MAZ            | 6.34E-01 | 5.94E-01 | 2.29 | 15.62 | 3.34E-03 |
| ERP29          | 6.33E-01 | 5.93E-01 | 2.29 | 15.55 | 3.39E-03 |
| TRAV9.1        | 6.33E-01 | 5.93E-01 | 2.29 | 15.54 | 3.39E-03 |
| C4orf47        | 6.33E-01 | 5.92E-01 | 2.29 | 15.53 | 3.40E-03 |
| LRRC37A4P_1    | 6.32E-01 | 5.92E-01 | 2.29 | 15.48 | 3.43E-03 |
| CLC            | 6.32E-01 | 5.91E-01 | 2.29 | 15.46 | 3.45E-03 |
| LOC105378030   | 6.32E-01 | 5.91E-01 | 2.29 | 15.45 | 3.45E-03 |
| HOXC.AS3       | 6.32E-01 | 5.91E-01 | 2.29 | 15.45 | 3.45E-03 |
| LMO7DN.IT1     | 6.31E-01 | 5.90E-01 | 2.30 | 15.42 | 3.48E-03 |
| WHAMMP1        | 6.31E-01 | 5.90E-01 | 2.30 | 15.40 | 3.49E-03 |
| SLC6A3_1       | 6.31E-01 | 5.90E-01 | 2.30 | 15.40 | 3.49E-03 |
| LOC388436      | 6.30E-01 | 5.88E-01 | 2.30 | 15.30 | 3.56E-03 |
| SYCE1L         | 6.29E-01 | 5.88E-01 | 2.30 | 15.28 | 3.57E-03 |
| LOC107985518   | 6.29E-01 | 5.88E-01 | 2.30 | 15.28 | 3.57E-03 |
| TCP11X2        | 6.29E-01 | 5.88E-01 | 2.30 | 15.27 | 3.58E-03 |
| LOC112267879   | 6.29E-01 | 5.87E-01 | 2.30 | 15.24 | 3.60E-03 |
| LOC105369649   | 6.29E-01 | 5.87E-01 | 2.30 | 15.24 | 3.60E-03 |
| LOC107984199   | 6.27E-01 | 5.85E-01 | 2.31 | 15.10 | 3.70E-03 |
| MYF6           | 6.26E-01 | 5.85E-01 | 2.31 | 15.08 | 3.71E-03 |
| CH507.145C22.1 | 6.25E-01 | 5.84E-01 | 2.32 | 15.03 | 3.75E-03 |
| LOC107985159   | 6.25E-01 | 5.83E-01 | 2.32 | 15.00 | 3.77E-03 |
| RCAN2          | 6.25E-01 | 5.83E-01 | 2.32 | 14.99 | 3.78E-03 |
| MIR1286        | 6.24E-01 | 5.82E-01 | 2.32 | 14.92 | 3.83E-03 |

|              |          |          |      |       |          |
|--------------|----------|----------|------|-------|----------|
| ARMC2.AS1    | 6.24E-01 | 5.82E-01 | 2.32 | 14.92 | 3.83E-03 |
| LOC107985342 | 6.24E-01 | 5.82E-01 | 2.32 | 14.92 | 3.83E-03 |
| ANAPC2       | 6.23E-01 | 5.81E-01 | 2.32 | 14.87 | 3.87E-03 |
| LOC107985151 | 6.22E-01 | 5.80E-01 | 2.32 | 14.84 | 3.90E-03 |
| EVX1.AS      | 6.22E-01 | 5.80E-01 | 2.32 | 14.83 | 3.90E-03 |
| MIR10527     | 6.22E-01 | 5.80E-01 | 2.33 | 14.81 | 3.92E-03 |
| LOC105379368 | 6.22E-01 | 5.80E-01 | 2.33 | 14.78 | 3.94E-03 |
| MORN5        | 6.21E-01 | 5.79E-01 | 2.33 | 14.76 | 3.95E-03 |
| LINC02285    | 6.21E-01 | 5.79E-01 | 2.33 | 14.73 | 3.98E-03 |
| LOC107985890 | 6.19E-01 | 5.77E-01 | 2.33 | 14.65 | 4.04E-03 |
| FAU          | 6.19E-01 | 5.77E-01 | 2.33 | 14.64 | 4.05E-03 |
| RAC3         | 6.19E-01 | 5.77E-01 | 2.33 | 14.63 | 4.06E-03 |
| PRAMEF7      | 6.18E-01 | 5.76E-01 | 2.34 | 14.58 | 4.10E-03 |
| LOC107984931 | 6.18E-01 | 5.75E-01 | 2.34 | 14.55 | 4.13E-03 |
| ARL17B       | 6.18E-01 | 5.75E-01 | 2.34 | 14.54 | 4.13E-03 |
| TRQ.CTG5.1   | 6.18E-01 | 5.75E-01 | 2.34 | 14.53 | 4.14E-03 |
| LOC105372407 | 6.17E-01 | 5.75E-01 | 2.34 | 14.53 | 4.14E-03 |
| LOC107985059 | 6.17E-01 | 5.74E-01 | 2.34 | 14.50 | 4.17E-03 |
| LOC105378052 | 6.17E-01 | 5.74E-01 | 2.34 | 14.48 | 4.18E-03 |
| LOC105378949 | 6.16E-01 | 5.73E-01 | 2.34 | 14.43 | 4.23E-03 |
| LOC107986949 | 6.15E-01 | 5.72E-01 | 2.35 | 14.38 | 4.27E-03 |
| SNORA74D     | 6.15E-01 | 5.72E-01 | 2.35 | 14.37 | 4.28E-03 |
| LOC107985095 | 6.14E-01 | 5.71E-01 | 2.35 | 14.33 | 4.31E-03 |
| TSL          | 6.14E-01 | 5.71E-01 | 2.35 | 14.33 | 4.31E-03 |
| LOC105370627 | 6.14E-01 | 5.71E-01 | 2.35 | 14.32 | 4.32E-03 |
| OXCT2        | 6.14E-01 | 5.71E-01 | 2.35 | 14.30 | 4.34E-03 |
| LOC107987187 | 6.13E-01 | 5.70E-01 | 2.35 | 14.26 | 4.37E-03 |
| OVCA2        | 6.13E-01 | 5.69E-01 | 2.35 | 14.23 | 4.40E-03 |
| A1BG.AS1     | 6.12E-01 | 5.69E-01 | 2.36 | 14.22 | 4.41E-03 |
| KIR3DL2_9    | 6.12E-01 | 5.69E-01 | 2.36 | 14.21 | 4.42E-03 |
| ADAM18       | 6.12E-01 | 5.69E-01 | 2.36 | 14.21 | 4.42E-03 |
| MGC4859      | 6.12E-01 | 5.69E-01 | 2.36 | 14.20 | 4.42E-03 |
| MIR1469      | 6.11E-01 | 5.68E-01 | 2.36 | 14.16 | 4.47E-03 |
| SEC23A.AS1   | 6.11E-01 | 5.68E-01 | 2.36 | 14.15 | 4.48E-03 |
| IGLV3.4      | 6.10E-01 | 5.67E-01 | 2.36 | 14.10 | 4.52E-03 |
| LINC01843    | 6.10E-01 | 5.67E-01 | 2.36 | 14.10 | 4.52E-03 |
| LOC105375303 | 6.10E-01 | 5.66E-01 | 2.36 | 14.06 | 4.55E-03 |
| LOC105378289 | 6.09E-01 | 5.66E-01 | 2.36 | 14.04 | 4.57E-03 |
| LINC01976    | 6.09E-01 | 5.65E-01 | 2.37 | 14.00 | 4.61E-03 |
| RAB11FIP1    | 6.08E-01 | 5.65E-01 | 2.37 | 13.99 | 4.63E-03 |
| LINC01717    | 6.08E-01 | 5.65E-01 | 2.37 | 13.98 | 4.63E-03 |

|              |          |          |      |       |          |
|--------------|----------|----------|------|-------|----------|
| MPG          | 6.08E-01 | 5.65E-01 | 2.37 | 13.98 | 4.63E-03 |
| OSBPL10.AS1  | 6.08E-01 | 5.64E-01 | 2.37 | 13.96 | 4.66E-03 |
| IGHV3.33_1   | 6.08E-01 | 5.64E-01 | 2.37 | 13.94 | 4.67E-03 |
| LOC101929614 | 6.07E-01 | 5.64E-01 | 2.37 | 13.92 | 4.69E-03 |
| FAM13C       | 6.07E-01 | 5.63E-01 | 2.37 | 13.88 | 4.73E-03 |
| PARD6G       | 6.06E-01 | 5.62E-01 | 2.37 | 13.85 | 4.75E-03 |
| LBHD2        | 6.06E-01 | 5.62E-01 | 2.37 | 13.85 | 4.76E-03 |
| LOC105369687 | 6.06E-01 | 5.62E-01 | 2.38 | 13.82 | 4.79E-03 |
| TRIM8        | 6.05E-01 | 5.61E-01 | 2.38 | 13.80 | 4.80E-03 |
| LOC100505622 | 6.05E-01 | 5.61E-01 | 2.38 | 13.80 | 4.81E-03 |
| ANKRD19P     | 6.05E-01 | 5.61E-01 | 2.38 | 13.79 | 4.82E-03 |
| LOC105375938 | 6.04E-01 | 5.61E-01 | 2.38 | 13.75 | 4.86E-03 |
| LOC114841040 | 6.03E-01 | 5.59E-01 | 2.38 | 13.70 | 4.91E-03 |
| MRGPRG       | 6.03E-01 | 5.59E-01 | 2.38 | 13.69 | 4.92E-03 |
| KIF2B        | 6.03E-01 | 5.59E-01 | 2.38 | 13.68 | 4.93E-03 |
| ZFX.AS1      | 6.03E-01 | 5.59E-01 | 2.38 | 13.66 | 4.96E-03 |
| ACP1         | 6.02E-01 | 5.57E-01 | 2.39 | 13.60 | 5.02E-03 |
| LINC01100    | 6.01E-01 | 5.57E-01 | 2.39 | 13.57 | 5.04E-03 |
| LOC105371716 | 6.01E-01 | 5.57E-01 | 2.39 | 13.57 | 5.05E-03 |
| MIR1285.2    | 6.01E-01 | 5.56E-01 | 2.39 | 13.54 | 5.07E-03 |
| LOC105369167 | 6.01E-01 | 5.56E-01 | 2.39 | 13.54 | 5.08E-03 |
| ZCCHC14      | 6.01E-01 | 5.56E-01 | 2.39 | 13.53 | 5.09E-03 |
| IFNA17       | 6.00E-01 | 5.56E-01 | 2.39 | 13.52 | 5.10E-03 |
| OSMR.AS1     | 6.00E-01 | 5.56E-01 | 2.39 | 13.50 | 5.12E-03 |
| SAMSN1.AS1   | 6.00E-01 | 5.56E-01 | 2.39 | 13.50 | 5.12E-03 |
| LOC107984436 | 5.99E-01 | 5.55E-01 | 2.39 | 13.47 | 5.15E-03 |
| BBC3         | 5.99E-01 | 5.54E-01 | 2.40 | 13.45 | 5.18E-03 |
| LOC100287010 | 5.99E-01 | 5.54E-01 | 2.40 | 13.44 | 5.19E-03 |
| LSP1P5       | 5.99E-01 | 5.54E-01 | 2.40 | 13.42 | 5.20E-03 |
| LOC105370733 | 5.98E-01 | 5.54E-01 | 2.40 | 13.41 | 5.22E-03 |
| TTC9B        | 5.98E-01 | 5.53E-01 | 2.40 | 13.39 | 5.24E-03 |
| ELF3         | 5.98E-01 | 5.53E-01 | 2.40 | 13.37 | 5.27E-03 |
| GADD45GIP1   | 5.98E-01 | 5.53E-01 | 2.40 | 13.36 | 5.27E-03 |
| C19orf81     | 5.97E-01 | 5.53E-01 | 2.40 | 13.35 | 5.28E-03 |
| C18orf63     | 5.97E-01 | 5.52E-01 | 2.40 | 13.32 | 5.32E-03 |
| LOC105369850 | 5.96E-01 | 5.51E-01 | 2.40 | 13.28 | 5.37E-03 |
| LINC02428    | 5.96E-01 | 5.51E-01 | 2.40 | 13.28 | 5.37E-03 |
| CFAP157      | 5.96E-01 | 5.51E-01 | 2.40 | 13.27 | 5.38E-03 |
| LYRM1        | 5.95E-01 | 5.50E-01 | 2.41 | 13.23 | 5.42E-03 |
| LOC102723630 | 5.95E-01 | 5.50E-01 | 2.41 | 13.23 | 5.43E-03 |
| SYNGAP1_1    | 5.95E-01 | 5.50E-01 | 2.41 | 13.23 | 5.43E-03 |

|                |          |          |      |       |          |
|----------------|----------|----------|------|-------|----------|
| LINC02321      | 5.95E-01 | 5.50E-01 | 2.41 | 13.21 | 5.45E-03 |
| LOC105372005   | 5.94E-01 | 5.49E-01 | 2.41 | 13.17 | 5.49E-03 |
| LOC107984432   | 5.94E-01 | 5.49E-01 | 2.41 | 13.16 | 5.50E-03 |
| LOC105374308   | 5.94E-01 | 5.49E-01 | 2.41 | 13.16 | 5.51E-03 |
| OTOS           | 5.93E-01 | 5.48E-01 | 2.41 | 13.12 | 5.56E-03 |
| LOC105379675   | 5.93E-01 | 5.47E-01 | 2.41 | 13.09 | 5.59E-03 |
| LINC01814      | 5.92E-01 | 5.47E-01 | 2.42 | 13.06 | 5.63E-03 |
| HOTTIP         | 5.92E-01 | 5.46E-01 | 2.42 | 13.05 | 5.64E-03 |
| LOC107986486   | 5.92E-01 | 5.46E-01 | 2.42 | 13.05 | 5.64E-03 |
| LOC105371072   | 5.91E-01 | 5.46E-01 | 2.42 | 13.02 | 5.68E-03 |
| LINC02545      | 5.91E-01 | 5.46E-01 | 2.42 | 13.01 | 5.68E-03 |
| MTFP1          | 5.91E-01 | 5.45E-01 | 2.42 | 13.00 | 5.70E-03 |
| LOC105370055   | 5.90E-01 | 5.45E-01 | 2.42 | 12.98 | 5.73E-03 |
| CDK17          | 5.90E-01 | 5.45E-01 | 2.42 | 12.97 | 5.73E-03 |
| LOC107986606   | 5.90E-01 | 5.44E-01 | 2.42 | 12.95 | 5.76E-03 |
| BMERB1_1       | 5.90E-01 | 5.44E-01 | 2.42 | 12.94 | 5.77E-03 |
| TSPY8          | 5.89E-01 | 5.44E-01 | 2.42 | 12.92 | 5.80E-03 |
| LOC105374498_1 | 5.89E-01 | 5.43E-01 | 2.43 | 12.88 | 5.85E-03 |
| MFHAS1_1       | 5.89E-01 | 5.43E-01 | 2.43 | 12.88 | 5.85E-03 |
| MYLK.AS1       | 5.88E-01 | 5.43E-01 | 2.43 | 12.87 | 5.87E-03 |
| LOC105376828   | 5.88E-01 | 5.43E-01 | 2.43 | 12.86 | 5.87E-03 |
| MIR3131        | 5.88E-01 | 5.42E-01 | 2.43 | 12.85 | 5.88E-03 |
| LOC101927898   | 5.88E-01 | 5.42E-01 | 2.43 | 12.85 | 5.89E-03 |
| TBX2.AS1       | 5.88E-01 | 5.42E-01 | 2.43 | 12.85 | 5.89E-03 |
| MIR12124       | 5.88E-01 | 5.42E-01 | 2.43 | 12.85 | 5.89E-03 |
| SNORD114.15    | 5.87E-01 | 5.41E-01 | 2.43 | 12.80 | 5.95E-03 |
| OR2J1_2        | 5.87E-01 | 5.41E-01 | 2.43 | 12.79 | 5.96E-03 |
| LOC105372208   | 5.87E-01 | 5.41E-01 | 2.43 | 12.78 | 5.97E-03 |
| LOC105373176   | 5.87E-01 | 5.41E-01 | 2.43 | 12.77 | 5.99E-03 |
| USP30.AS1      | 5.86E-01 | 5.41E-01 | 2.43 | 12.76 | 6.00E-03 |
| PAQR4          | 5.86E-01 | 5.40E-01 | 2.43 | 12.73 | 6.04E-03 |
| NRGN           | 5.86E-01 | 5.40E-01 | 2.44 | 12.72 | 6.06E-03 |
| LOC101928069   | 5.85E-01 | 5.39E-01 | 2.44 | 12.68 | 6.11E-03 |
| CNPY2          | 5.85E-01 | 5.39E-01 | 2.44 | 12.68 | 6.12E-03 |
| SLC43A2        | 5.85E-01 | 5.38E-01 | 2.44 | 12.66 | 6.13E-03 |
| RPH3AL_2       | 5.84E-01 | 5.38E-01 | 2.44 | 12.65 | 6.15E-03 |
| LOC105377315   | 5.83E-01 | 5.37E-01 | 2.44 | 12.59 | 6.24E-03 |
| LOC101928188   | 5.83E-01 | 5.36E-01 | 2.44 | 12.57 | 6.26E-03 |
| MIR153.2       | 5.83E-01 | 5.36E-01 | 2.44 | 12.56 | 6.27E-03 |
| NREP           | 5.83E-01 | 5.36E-01 | 2.44 | 12.56 | 6.28E-03 |
| TRIM49B        | 5.82E-01 | 5.36E-01 | 2.44 | 12.55 | 6.29E-03 |

|              |          |          |      |       |          |
|--------------|----------|----------|------|-------|----------|
| DBNDD2       | 5.82E-01 | 5.35E-01 | 2.45 | 12.51 | 6.35E-03 |
| VTN          | 5.81E-01 | 5.34E-01 | 2.45 | 12.48 | 6.38E-03 |
| BAALC.AS1    | 5.80E-01 | 5.34E-01 | 2.45 | 12.45 | 6.43E-03 |
| LOC645188    | 5.80E-01 | 5.34E-01 | 2.45 | 12.45 | 6.43E-03 |
| NPIPA8       | 5.80E-01 | 5.34E-01 | 2.45 | 12.45 | 6.44E-03 |
| LOC105377094 | 5.80E-01 | 5.34E-01 | 2.45 | 12.44 | 6.45E-03 |
| LOC105373334 | 5.80E-01 | 5.33E-01 | 2.45 | 12.44 | 6.45E-03 |
| OR6N2        | 5.80E-01 | 5.33E-01 | 2.45 | 12.43 | 6.46E-03 |
| P3R3URF      | 5.80E-01 | 5.33E-01 | 2.45 | 12.42 | 6.47E-03 |
| LINC00640    | 5.79E-01 | 5.33E-01 | 2.45 | 12.40 | 6.51E-03 |
| INO80B       | 5.79E-01 | 5.32E-01 | 2.45 | 12.39 | 6.52E-03 |
| COG8         | 5.79E-01 | 5.32E-01 | 2.45 | 12.38 | 6.53E-03 |
| LOC107986884 | 5.79E-01 | 5.32E-01 | 2.45 | 12.37 | 6.54E-03 |
| RNU7.1       | 5.79E-01 | 5.32E-01 | 2.46 | 12.36 | 6.56E-03 |
| CENPS        | 5.79E-01 | 5.32E-01 | 2.46 | 12.36 | 6.56E-03 |
| HNF1B        | 5.78E-01 | 5.31E-01 | 2.46 | 12.30 | 6.64E-03 |
| LINC00459    | 5.77E-01 | 5.30E-01 | 2.46 | 12.29 | 6.66E-03 |
| MROCKI       | 5.77E-01 | 5.30E-01 | 2.46 | 12.27 | 6.70E-03 |
| LOC105377498 | 5.77E-01 | 5.30E-01 | 2.46 | 12.26 | 6.71E-03 |
| NRTN         | 5.76E-01 | 5.29E-01 | 2.46 | 12.25 | 6.73E-03 |
| IGLV10.67    | 5.76E-01 | 5.29E-01 | 2.46 | 12.24 | 6.74E-03 |
| LOC105377537 | 5.76E-01 | 5.29E-01 | 2.46 | 12.23 | 6.75E-03 |
| MUC5AC       | 5.76E-01 | 5.29E-01 | 2.46 | 12.23 | 6.76E-03 |
| LOC105378040 | 5.76E-01 | 5.29E-01 | 2.46 | 12.23 | 6.76E-03 |
| MIR422A      | 5.76E-01 | 5.29E-01 | 2.46 | 12.22 | 6.76E-03 |
| LOC107984654 | 5.76E-01 | 5.29E-01 | 2.46 | 12.22 | 6.76E-03 |
| DENND4C      | 5.76E-01 | 5.29E-01 | 2.46 | 12.22 | 6.78E-03 |
| XKR6_1       | 5.76E-01 | 5.29E-01 | 2.46 | 12.21 | 6.78E-03 |
| LOC105372791 | 5.76E-01 | 5.28E-01 | 2.46 | 12.21 | 6.79E-03 |
| LINC01650    | 5.76E-01 | 5.28E-01 | 2.46 | 12.21 | 6.79E-03 |
| LOC105371635 | 5.76E-01 | 5.28E-01 | 2.46 | 12.20 | 6.79E-03 |
| LOC105377121 | 5.75E-01 | 5.28E-01 | 2.47 | 12.19 | 6.82E-03 |
| PTPMT1       | 5.75E-01 | 5.28E-01 | 2.47 | 12.18 | 6.83E-03 |
| MIR6512      | 5.75E-01 | 5.28E-01 | 2.47 | 12.18 | 6.83E-03 |
| TRK.CTT7.1   | 5.75E-01 | 5.28E-01 | 2.47 | 12.18 | 6.83E-03 |
| LOC105375789 | 5.75E-01 | 5.28E-01 | 2.47 | 12.18 | 6.83E-03 |
| LOC105372602 | 5.75E-01 | 5.28E-01 | 2.47 | 12.17 | 6.84E-03 |
| LOC105369809 | 5.75E-01 | 5.28E-01 | 2.47 | 12.17 | 6.84E-03 |
| LOC101929536 | 5.75E-01 | 5.27E-01 | 2.47 | 12.16 | 6.86E-03 |
| MRPL52       | 5.75E-01 | 5.27E-01 | 2.47 | 12.16 | 6.87E-03 |
| NAPEPLD_1    | 5.75E-01 | 5.27E-01 | 2.47 | 12.16 | 6.87E-03 |

|              |          |          |      |       |          |
|--------------|----------|----------|------|-------|----------|
| FRMPD2B      | 5.75E-01 | 5.27E-01 | 2.47 | 12.15 | 6.87E-03 |
| TMC3.AS1     | 5.74E-01 | 5.27E-01 | 2.47 | 12.15 | 6.88E-03 |
| LOC105369969 | 5.74E-01 | 5.27E-01 | 2.47 | 12.14 | 6.89E-03 |
| TRC.GCA2.3   | 5.74E-01 | 5.27E-01 | 2.47 | 12.14 | 6.90E-03 |
| WWTR1.AS1    | 5.74E-01 | 5.27E-01 | 2.47 | 12.13 | 6.91E-03 |
| TRS.GCT6.1   | 5.74E-01 | 5.27E-01 | 2.47 | 12.12 | 6.92E-03 |
| LOC105378603 | 5.74E-01 | 5.26E-01 | 2.47 | 12.11 | 6.93E-03 |
| MIR4689      | 5.74E-01 | 5.26E-01 | 2.47 | 12.11 | 6.93E-03 |
| RNVU1.19     | 5.74E-01 | 5.26E-01 | 2.47 | 12.11 | 6.93E-03 |
| MIR190B      | 5.74E-01 | 5.26E-01 | 2.47 | 12.11 | 6.93E-03 |
| HAGLROS      | 5.74E-01 | 5.26E-01 | 2.47 | 12.11 | 6.93E-03 |
| MIR7845      | 5.74E-01 | 5.26E-01 | 2.47 | 12.11 | 6.93E-03 |
| MIR572       | 5.74E-01 | 5.26E-01 | 2.47 | 12.11 | 6.93E-03 |
| MIR548T      | 5.74E-01 | 5.26E-01 | 2.47 | 12.11 | 6.93E-03 |
| MIR3145      | 5.74E-01 | 5.26E-01 | 2.47 | 12.11 | 6.93E-03 |
| MIR4655      | 5.74E-01 | 5.26E-01 | 2.47 | 12.11 | 6.93E-03 |
| MIR5692A1    | 5.74E-01 | 5.26E-01 | 2.47 | 12.11 | 6.93E-03 |
| MIR3666      | 5.74E-01 | 5.26E-01 | 2.47 | 12.11 | 6.93E-03 |
| TRBV6.5      | 5.74E-01 | 5.26E-01 | 2.47 | 12.11 | 6.93E-03 |
| ARHGEF34P    | 5.74E-01 | 5.26E-01 | 2.47 | 12.11 | 6.93E-03 |
| LOC101929128 | 5.74E-01 | 5.26E-01 | 2.47 | 12.11 | 6.93E-03 |
| FAM86B2      | 5.74E-01 | 5.26E-01 | 2.47 | 12.11 | 6.93E-03 |
| MIR30D       | 5.74E-01 | 5.26E-01 | 2.47 | 12.11 | 6.93E-03 |
| C8orf31      | 5.74E-01 | 5.26E-01 | 2.47 | 12.11 | 6.93E-03 |
| LOC107987066 | 5.74E-01 | 5.26E-01 | 2.47 | 12.11 | 6.93E-03 |
| LOC105379453 | 5.74E-01 | 5.26E-01 | 2.47 | 12.11 | 6.93E-03 |
| MIR6081      | 5.74E-01 | 5.26E-01 | 2.47 | 12.11 | 6.93E-03 |
| MIR3155A     | 5.74E-01 | 5.26E-01 | 2.47 | 12.11 | 6.93E-03 |
| DRD4         | 5.74E-01 | 5.26E-01 | 2.47 | 12.11 | 6.93E-03 |
| TRR.TCT3.2   | 5.74E-01 | 5.26E-01 | 2.47 | 12.11 | 6.93E-03 |
| TRS.GCT3.1   | 5.74E-01 | 5.26E-01 | 2.47 | 12.11 | 6.93E-03 |
| SNORD14D     | 5.74E-01 | 5.26E-01 | 2.47 | 12.11 | 6.93E-03 |
| SNORD14C     | 5.74E-01 | 5.26E-01 | 2.47 | 12.11 | 6.93E-03 |
| C1RL         | 5.74E-01 | 5.26E-01 | 2.47 | 12.11 | 6.93E-03 |
| MIR4498      | 5.74E-01 | 5.26E-01 | 2.47 | 12.11 | 6.93E-03 |
| MIR4305      | 5.74E-01 | 5.26E-01 | 2.47 | 12.11 | 6.93E-03 |
| TRAJ38       | 5.74E-01 | 5.26E-01 | 2.47 | 12.11 | 6.93E-03 |
| TRAJ8        | 5.74E-01 | 5.26E-01 | 2.47 | 12.11 | 6.93E-03 |
| TRAJ3        | 5.74E-01 | 5.26E-01 | 2.47 | 12.11 | 6.93E-03 |
| OR4M2        | 5.74E-01 | 5.26E-01 | 2.47 | 12.11 | 6.93E-03 |
| SNORD115.1   | 5.74E-01 | 5.26E-01 | 2.47 | 12.11 | 6.93E-03 |



|                |          |          |      |       |          |
|----------------|----------|----------|------|-------|----------|
| LOC112268159   | 5.74E-01 | 5.26E-01 | 2.47 | 12.11 | 6.93E-03 |
| LOC105370926   | 5.74E-01 | 5.26E-01 | 2.47 | 12.11 | 6.93E-03 |
| LINC00254      | 5.74E-01 | 5.26E-01 | 2.47 | 12.11 | 6.93E-03 |
| SLX1A.SULT1A3  | 5.74E-01 | 5.26E-01 | 2.47 | 12.11 | 6.93E-03 |
| MIR195         | 5.74E-01 | 5.26E-01 | 2.47 | 12.11 | 6.93E-03 |
| MIR6883        | 5.74E-01 | 5.26E-01 | 2.47 | 12.11 | 6.93E-03 |
| LOC105371754   | 5.74E-01 | 5.26E-01 | 2.47 | 12.11 | 6.93E-03 |
| MAPT.IT1       | 5.74E-01 | 5.26E-01 | 2.47 | 12.11 | 6.93E-03 |
| LOC107985023   | 5.74E-01 | 5.26E-01 | 2.47 | 12.11 | 6.93E-03 |
| MIR1268B       | 5.74E-01 | 5.26E-01 | 2.47 | 12.11 | 6.93E-03 |
| MIR4322        | 5.74E-01 | 5.26E-01 | 2.47 | 12.11 | 6.93E-03 |
| ZNF100         | 5.74E-01 | 5.26E-01 | 2.47 | 12.11 | 6.93E-03 |
| MIR296         | 5.74E-01 | 5.26E-01 | 2.47 | 12.11 | 6.93E-03 |
| MIR124.3       | 5.74E-01 | 5.26E-01 | 2.47 | 12.11 | 6.93E-03 |
| LOC107987288   | 5.74E-01 | 5.26E-01 | 2.47 | 12.11 | 6.93E-03 |
| MIR12114       | 5.74E-01 | 5.26E-01 | 2.47 | 12.11 | 6.93E-03 |
| MIR500A        | 5.74E-01 | 5.26E-01 | 2.47 | 12.11 | 6.93E-03 |
| MAGED4         | 5.74E-01 | 5.26E-01 | 2.47 | 12.11 | 6.93E-03 |
| TTY2B          | 5.74E-01 | 5.26E-01 | 2.47 | 12.11 | 6.93E-03 |
| C8orf74_1      | 5.74E-01 | 5.26E-01 | 2.47 | 12.11 | 6.93E-03 |
| PRSS22_1       | 5.74E-01 | 5.26E-01 | 2.47 | 12.11 | 6.93E-03 |
| LGALS7_1       | 5.74E-01 | 5.26E-01 | 2.47 | 12.11 | 6.93E-03 |
| KIR3DL3_9      | 5.74E-01 | 5.26E-01 | 2.47 | 12.11 | 6.93E-03 |
| PRAMEF18_3     | 5.74E-01 | 5.26E-01 | 2.47 | 12.11 | 6.93E-03 |
| LOC105374167_1 | 5.74E-01 | 5.26E-01 | 2.47 | 12.11 | 6.93E-03 |
| LOC107986177_1 | 5.74E-01 | 5.26E-01 | 2.47 | 12.11 | 6.93E-03 |
| TRBV12.2_1     | 5.74E-01 | 5.26E-01 | 2.47 | 12.11 | 6.93E-03 |
| TAS2R19_1      | 5.74E-01 | 5.26E-01 | 2.47 | 12.11 | 6.93E-03 |
| TAS2R46_1      | 5.74E-01 | 5.26E-01 | 2.47 | 12.11 | 6.93E-03 |
| CYFIP1_2       | 5.74E-01 | 5.26E-01 | 2.47 | 12.11 | 6.93E-03 |
| NTAN1_1        | 5.74E-01 | 5.26E-01 | 2.47 | 12.11 | 6.93E-03 |
| LOC105379605   | 5.74E-01 | 5.26E-01 | 2.47 | 12.11 | 6.93E-03 |
| GUSBP15_1      | 5.74E-01 | 5.26E-01 | 2.47 | 12.11 | 6.93E-03 |
| HLA.DQA1_1     | 5.74E-01 | 5.26E-01 | 2.47 | 12.11 | 6.93E-03 |
| HLA.DQA2_2     | 5.74E-01 | 5.26E-01 | 2.47 | 12.11 | 6.93E-03 |
| ZNRD1ASP_4     | 5.74E-01 | 5.26E-01 | 2.47 | 12.11 | 6.93E-03 |
| OR12D2_5       | 5.74E-01 | 5.26E-01 | 2.47 | 12.11 | 6.93E-03 |
| HLA.DQA1_6     | 5.74E-01 | 5.26E-01 | 2.47 | 12.11 | 6.93E-03 |
| HLA.DQA2_7     | 5.74E-01 | 5.26E-01 | 2.47 | 12.11 | 6.93E-03 |
| LILRP2_18      | 5.74E-01 | 5.26E-01 | 2.47 | 12.11 | 6.93E-03 |
| LOC105377784_1 | 5.74E-01 | 5.26E-01 | 2.47 | 12.11 | 6.93E-03 |

|              |          |          |      |       |          |
|--------------|----------|----------|------|-------|----------|
| GPR179       | 5.74E-01 | 5.26E-01 | 2.47 | 12.11 | 6.95E-03 |
| PCDHGA8      | 5.74E-01 | 5.26E-01 | 2.47 | 12.10 | 6.95E-03 |
| PNKY         | 5.73E-01 | 5.26E-01 | 2.47 | 12.09 | 6.97E-03 |
| LOC107986068 | 5.73E-01 | 5.25E-01 | 2.47 | 12.07 | 7.00E-03 |
| HOXC4        | 5.73E-01 | 5.25E-01 | 2.47 | 12.07 | 7.01E-03 |
| LOC112268270 | 5.73E-01 | 5.25E-01 | 2.47 | 12.06 | 7.01E-03 |
| SNORD13I     | 5.73E-01 | 5.25E-01 | 2.47 | 12.06 | 7.02E-03 |
| SNORD115.32  | 5.73E-01 | 5.25E-01 | 2.47 | 12.06 | 7.02E-03 |
| TRV.CAC1.5   | 5.73E-01 | 5.25E-01 | 2.47 | 12.06 | 7.02E-03 |
| MIR4513      | 5.73E-01 | 5.25E-01 | 2.47 | 12.06 | 7.02E-03 |
| IGLVIV.53    | 5.73E-01 | 5.25E-01 | 2.47 | 12.05 | 7.03E-03 |
| BATF2        | 5.72E-01 | 5.24E-01 | 2.47 | 12.03 | 7.07E-03 |
| LINC00421    | 5.72E-01 | 5.24E-01 | 2.48 | 12.01 | 7.09E-03 |
| PCDHGC4      | 5.72E-01 | 5.24E-01 | 2.48 | 12.01 | 7.10E-03 |
| MIR449A      | 5.71E-01 | 5.24E-01 | 2.48 | 12.00 | 7.11E-03 |
| SNORA25      | 5.71E-01 | 5.24E-01 | 2.48 | 11.99 | 7.13E-03 |
| LOC102723530 | 5.71E-01 | 5.24E-01 | 2.48 | 11.99 | 7.13E-03 |
| LOC105376286 | 5.71E-01 | 5.24E-01 | 2.48 | 11.99 | 7.13E-03 |
| LOC112268195 | 5.71E-01 | 5.23E-01 | 2.48 | 11.97 | 7.16E-03 |
| LINC01089    | 5.71E-01 | 5.23E-01 | 2.48 | 11.96 | 7.17E-03 |
| MIR6079      | 5.71E-01 | 5.23E-01 | 2.48 | 11.96 | 7.19E-03 |
| TRAJ36       | 5.71E-01 | 5.23E-01 | 2.48 | 11.96 | 7.19E-03 |
| TRAJ47       | 5.70E-01 | 5.22E-01 | 2.48 | 11.93 | 7.23E-03 |
| H4C11        | 5.70E-01 | 5.22E-01 | 2.48 | 11.93 | 7.23E-03 |
| LOC105376316 | 5.70E-01 | 5.22E-01 | 2.48 | 11.93 | 7.23E-03 |
| OR5V1_3      | 5.70E-01 | 5.22E-01 | 2.48 | 11.92 | 7.25E-03 |
| MIR519D      | 5.70E-01 | 5.22E-01 | 2.48 | 11.91 | 7.27E-03 |
| LOC105378250 | 5.69E-01 | 5.22E-01 | 2.48 | 11.90 | 7.27E-03 |
| JSRP1        | 5.69E-01 | 5.22E-01 | 2.48 | 11.90 | 7.27E-03 |
| LOC107986757 | 5.69E-01 | 5.22E-01 | 2.48 | 11.90 | 7.28E-03 |
| TRK.CTT2.2   | 5.69E-01 | 5.21E-01 | 2.48 | 11.90 | 7.29E-03 |
| TIMP1        | 5.69E-01 | 5.21E-01 | 2.48 | 11.89 | 7.29E-03 |
| TRDJ1        | 5.69E-01 | 5.21E-01 | 2.48 | 11.87 | 7.32E-03 |
| MIR12126     | 5.68E-01 | 5.20E-01 | 2.49 | 11.84 | 7.37E-03 |
| KDM4A.AS1    | 5.68E-01 | 5.20E-01 | 2.49 | 11.84 | 7.38E-03 |
| FOXP4.AS1    | 5.68E-01 | 5.20E-01 | 2.49 | 11.84 | 7.38E-03 |
| ACTB         | 5.68E-01 | 5.20E-01 | 2.49 | 11.81 | 7.43E-03 |
| MICA_3       | 5.67E-01 | 5.19E-01 | 2.49 | 11.80 | 7.45E-03 |
| LOC105374402 | 5.67E-01 | 5.19E-01 | 2.49 | 11.80 | 7.45E-03 |
| SOCS1        | 5.67E-01 | 5.19E-01 | 2.49 | 11.79 | 7.46E-03 |
| TRK.TTT5.1   | 5.67E-01 | 5.19E-01 | 2.49 | 11.79 | 7.47E-03 |

|              |          |          |      |       |          |
|--------------|----------|----------|------|-------|----------|
| TRK.TTT3.5   | 5.67E-01 | 5.19E-01 | 2.49 | 11.79 | 7.47E-03 |
| TRAJ54       | 5.67E-01 | 5.19E-01 | 2.49 | 11.79 | 7.47E-03 |
| LOC105377733 | 5.67E-01 | 5.19E-01 | 2.49 | 11.78 | 7.47E-03 |
| PDHA2        | 5.67E-01 | 5.19E-01 | 2.49 | 11.77 | 7.50E-03 |
| MIR653       | 5.67E-01 | 5.18E-01 | 2.49 | 11.77 | 7.50E-03 |
| C1orf122     | 5.67E-01 | 5.18E-01 | 2.49 | 11.76 | 7.51E-03 |
| WBP1         | 5.66E-01 | 5.18E-01 | 2.49 | 11.76 | 7.52E-03 |
| CTSW         | 5.66E-01 | 5.18E-01 | 2.49 | 11.75 | 7.53E-03 |
| CD160        | 5.66E-01 | 5.18E-01 | 2.49 | 11.75 | 7.53E-03 |
| MEA1         | 5.66E-01 | 5.18E-01 | 2.49 | 11.75 | 7.53E-03 |
| LINC02398    | 5.66E-01 | 5.18E-01 | 2.49 | 11.74 | 7.55E-03 |
| LOC652276    | 5.66E-01 | 5.18E-01 | 2.49 | 11.74 | 7.56E-03 |
| CRCT1        | 5.66E-01 | 5.18E-01 | 2.49 | 11.73 | 7.57E-03 |
| TRY.GTA6.1   | 5.65E-01 | 5.17E-01 | 2.49 | 11.71 | 7.60E-03 |
| CHODL.AS1    | 5.65E-01 | 5.17E-01 | 2.49 | 11.71 | 7.61E-03 |
| SNORD116.17  | 5.65E-01 | 5.17E-01 | 2.49 | 11.70 | 7.62E-03 |
| OARD1        | 5.65E-01 | 5.17E-01 | 2.49 | 11.70 | 7.62E-03 |
| SIGMAR1      | 5.65E-01 | 5.17E-01 | 2.50 | 11.69 | 7.65E-03 |
| GNGT1        | 5.65E-01 | 5.16E-01 | 2.50 | 11.67 | 7.68E-03 |
| LOC107986204 | 5.64E-01 | 5.16E-01 | 2.50 | 11.66 | 7.69E-03 |
| LOC101928953 | 5.64E-01 | 5.15E-01 | 2.50 | 11.64 | 7.73E-03 |
| SNORD114.14  | 5.64E-01 | 5.15E-01 | 2.50 | 11.62 | 7.76E-03 |
| LOC105376154 | 5.63E-01 | 5.15E-01 | 2.50 | 11.62 | 7.77E-03 |
| IGLV5.48     | 5.63E-01 | 5.15E-01 | 2.50 | 11.61 | 7.78E-03 |
| NAP1L4       | 5.63E-01 | 5.15E-01 | 2.50 | 11.60 | 7.79E-03 |
| LOC112268355 | 5.63E-01 | 5.15E-01 | 2.50 | 11.60 | 7.80E-03 |
| GPR151       | 5.63E-01 | 5.14E-01 | 2.50 | 11.60 | 7.81E-03 |
| MMP24OS      | 5.63E-01 | 5.14E-01 | 2.50 | 11.60 | 7.81E-03 |
| LOC101928475 | 5.62E-01 | 5.14E-01 | 2.50 | 11.57 | 7.86E-03 |
| MIR501       | 5.62E-01 | 5.14E-01 | 2.50 | 11.57 | 7.86E-03 |
| TRAJ19       | 5.62E-01 | 5.14E-01 | 2.50 | 11.57 | 7.86E-03 |
| ABR_2        | 5.62E-01 | 5.14E-01 | 2.50 | 11.57 | 7.86E-03 |
| PLA2G1B      | 5.62E-01 | 5.14E-01 | 2.50 | 11.56 | 7.88E-03 |
| SNORD114.25  | 5.61E-01 | 5.12E-01 | 2.51 | 11.50 | 7.98E-03 |
| LOC105376341 | 5.61E-01 | 5.12E-01 | 2.51 | 11.50 | 7.98E-03 |
| LOC101928718 | 5.61E-01 | 5.12E-01 | 2.51 | 11.49 | 7.99E-03 |
| PIAS1        | 5.60E-01 | 5.11E-01 | 2.51 | 11.45 | 8.09E-03 |
| TRK.TTT1.1   | 5.60E-01 | 5.11E-01 | 2.51 | 11.44 | 8.10E-03 |
| LOC105372246 | 5.59E-01 | 5.11E-01 | 2.51 | 11.43 | 8.12E-03 |
| LOC107984609 | 5.59E-01 | 5.10E-01 | 2.51 | 11.41 | 8.16E-03 |
| CES5A_1      | 5.59E-01 | 5.10E-01 | 2.51 | 11.41 | 8.16E-03 |

|              |          |          |      |       |          |
|--------------|----------|----------|------|-------|----------|
| GPC3.AS1     | 5.59E-01 | 5.10E-01 | 2.51 | 11.40 | 8.18E-03 |
| LOC105370689 | 5.59E-01 | 5.10E-01 | 2.51 | 11.40 | 8.18E-03 |
| NR2C2AP      | 5.58E-01 | 5.09E-01 | 2.51 | 11.39 | 8.20E-03 |
| LINC01574    | 5.58E-01 | 5.09E-01 | 2.51 | 11.38 | 8.21E-03 |
| LOC107986948 | 5.58E-01 | 5.09E-01 | 2.51 | 11.38 | 8.22E-03 |
| NADK         | 5.58E-01 | 5.09E-01 | 2.51 | 11.37 | 8.22E-03 |
| MTMR9_1      | 5.58E-01 | 5.09E-01 | 2.51 | 11.37 | 8.23E-03 |
| LRMDA        | 5.58E-01 | 5.09E-01 | 2.51 | 11.37 | 8.23E-03 |
| ARMCX2       | 5.58E-01 | 5.09E-01 | 2.51 | 11.37 | 8.24E-03 |
| KRTAP6.3     | 5.58E-01 | 5.09E-01 | 2.51 | 11.36 | 8.24E-03 |
| MRPS28       | 5.58E-01 | 5.09E-01 | 2.51 | 11.36 | 8.25E-03 |
| LOC107984124 | 5.58E-01 | 5.09E-01 | 2.52 | 11.35 | 8.26E-03 |
| MIR2052      | 5.58E-01 | 5.09E-01 | 2.52 | 11.35 | 8.27E-03 |
| LOC105374054 | 5.57E-01 | 5.08E-01 | 2.52 | 11.34 | 8.29E-03 |
| LOC107986944 | 5.57E-01 | 5.08E-01 | 2.52 | 11.33 | 8.31E-03 |
| LOC107986578 | 5.57E-01 | 5.08E-01 | 2.52 | 11.32 | 8.33E-03 |
| AREG         | 5.57E-01 | 5.08E-01 | 2.52 | 11.31 | 8.34E-03 |
| MYRIP        | 5.57E-01 | 5.08E-01 | 2.52 | 11.31 | 8.34E-03 |
| GPC4         | 5.57E-01 | 5.08E-01 | 2.52 | 11.31 | 8.35E-03 |
| RDH8         | 5.57E-01 | 5.07E-01 | 2.52 | 11.30 | 8.37E-03 |
| LOC105371276 | 5.56E-01 | 5.07E-01 | 2.52 | 11.26 | 8.44E-03 |
| LOC107986747 | 5.56E-01 | 5.06E-01 | 2.52 | 11.26 | 8.45E-03 |
| LOC107984188 | 5.56E-01 | 5.06E-01 | 2.52 | 11.26 | 8.45E-03 |
| ARL11        | 5.56E-01 | 5.06E-01 | 2.52 | 11.25 | 8.47E-03 |
| CMTR2        | 5.56E-01 | 5.06E-01 | 2.52 | 11.25 | 8.47E-03 |
| RPRM         | 5.55E-01 | 5.06E-01 | 2.52 | 11.23 | 8.51E-03 |
| MUC4_3       | 5.55E-01 | 5.06E-01 | 2.52 | 11.23 | 8.51E-03 |
| P2RX1        | 5.55E-01 | 5.05E-01 | 2.52 | 11.22 | 8.53E-03 |
| C11orf94     | 5.54E-01 | 5.05E-01 | 2.53 | 11.19 | 8.58E-03 |
| LYPLAL1.DT   | 5.54E-01 | 5.04E-01 | 2.53 | 11.18 | 8.61E-03 |
| PRSS57       | 5.54E-01 | 5.04E-01 | 2.53 | 11.17 | 8.63E-03 |
| MIR548H5     | 5.53E-01 | 5.04E-01 | 2.53 | 11.16 | 8.66E-03 |
| LOC105371167 | 5.53E-01 | 5.04E-01 | 2.53 | 11.15 | 8.66E-03 |
| WFDC6        | 5.53E-01 | 5.04E-01 | 2.53 | 11.15 | 8.67E-03 |
| LOC105370871 | 5.53E-01 | 5.04E-01 | 2.53 | 11.14 | 8.68E-03 |
| LOC105373493 | 5.53E-01 | 5.03E-01 | 2.53 | 11.14 | 8.70E-03 |
| PRRX2.AS1    | 5.53E-01 | 5.03E-01 | 2.53 | 11.13 | 8.72E-03 |
| PDLIM1       | 5.53E-01 | 5.03E-01 | 2.53 | 11.12 | 8.73E-03 |
| LOC107986453 | 5.52E-01 | 5.03E-01 | 2.53 | 11.10 | 8.77E-03 |
| LINC01093    | 5.52E-01 | 5.02E-01 | 2.53 | 11.09 | 8.80E-03 |
| LINC00052    | 5.52E-01 | 5.02E-01 | 2.53 | 11.08 | 8.81E-03 |

|              |          |          |      |       |          |
|--------------|----------|----------|------|-------|----------|
| LOC107985500 | 5.52E-01 | 5.02E-01 | 2.53 | 11.08 | 8.81E-03 |
| LOC105378866 | 5.51E-01 | 5.02E-01 | 2.53 | 11.07 | 8.85E-03 |
| LOC105372920 | 5.51E-01 | 5.02E-01 | 2.53 | 11.06 | 8.85E-03 |
| LOC105373408 | 5.51E-01 | 5.01E-01 | 2.53 | 11.05 | 8.88E-03 |
| LOC102723760 | 5.51E-01 | 5.01E-01 | 2.53 | 11.04 | 8.90E-03 |
| LOC100128288 | 5.51E-01 | 5.01E-01 | 2.53 | 11.04 | 8.91E-03 |
| MIR223       | 5.51E-01 | 5.01E-01 | 2.54 | 11.04 | 8.91E-03 |
| LOC105371318 | 5.50E-01 | 5.00E-01 | 2.54 | 11.01 | 8.96E-03 |
| LOC105370002 | 5.50E-01 | 5.00E-01 | 2.54 | 11.01 | 8.98E-03 |
| MIR548Q      | 5.50E-01 | 5.00E-01 | 2.54 | 11.00 | 8.98E-03 |
| MIR5590      | 5.50E-01 | 5.00E-01 | 2.54 | 10.99 | 9.01E-03 |
| SNORD53      | 5.50E-01 | 5.00E-01 | 2.54 | 10.98 | 9.03E-03 |
| LINC01194    | 5.50E-01 | 5.00E-01 | 2.54 | 10.98 | 9.03E-03 |
| TRBV7.4      | 5.50E-01 | 4.99E-01 | 2.54 | 10.98 | 9.03E-03 |
| LOC107987417 | 5.50E-01 | 4.99E-01 | 2.54 | 10.98 | 9.03E-03 |
| LOC105377137 | 5.50E-01 | 4.99E-01 | 2.54 | 10.98 | 9.03E-03 |
| LOC105371468 | 5.50E-01 | 4.99E-01 | 2.54 | 10.98 | 9.04E-03 |
| GJD4         | 5.49E-01 | 4.99E-01 | 2.54 | 10.98 | 9.04E-03 |
| LOC102723811 | 5.49E-01 | 4.99E-01 | 2.54 | 10.96 | 9.08E-03 |
| TRAV12.3     | 5.49E-01 | 4.99E-01 | 2.54 | 10.94 | 9.11E-03 |
| LOC100130172 | 5.48E-01 | 4.98E-01 | 2.54 | 10.91 | 9.18E-03 |
| TTC8         | 5.48E-01 | 4.98E-01 | 2.54 | 10.91 | 9.18E-03 |
| LOC101929154 | 5.48E-01 | 4.97E-01 | 2.54 | 10.89 | 9.23E-03 |
| LOC105372508 | 5.47E-01 | 4.97E-01 | 2.54 | 10.89 | 9.23E-03 |
| LOC105375775 | 5.47E-01 | 4.97E-01 | 2.54 | 10.89 | 9.24E-03 |
| LOC107986639 | 5.47E-01 | 4.97E-01 | 2.55 | 10.86 | 9.29E-03 |
| SPTBN1       | 5.47E-01 | 4.96E-01 | 2.55 | 10.86 | 9.30E-03 |
| LINC02409    | 5.47E-01 | 4.96E-01 | 2.55 | 10.86 | 9.30E-03 |
| RNF185       | 5.46E-01 | 4.96E-01 | 2.55 | 10.85 | 9.33E-03 |
| LOC107984273 | 5.46E-01 | 4.96E-01 | 2.55 | 10.84 | 9.34E-03 |
| SLIRP        | 5.46E-01 | 4.96E-01 | 2.55 | 10.83 | 9.37E-03 |
| TMSB15A      | 5.46E-01 | 4.95E-01 | 2.55 | 10.82 | 9.39E-03 |
| RERG.AS1     | 5.46E-01 | 4.95E-01 | 2.55 | 10.81 | 9.41E-03 |
| LOC101927839 | 5.45E-01 | 4.95E-01 | 2.55 | 10.80 | 9.43E-03 |
| LOC105371989 | 5.45E-01 | 4.95E-01 | 2.55 | 10.80 | 9.44E-03 |
| MIR1269A     | 5.45E-01 | 4.95E-01 | 2.55 | 10.80 | 9.44E-03 |
| FMC1         | 5.45E-01 | 4.95E-01 | 2.55 | 10.80 | 9.44E-03 |
| ZNF292       | 5.45E-01 | 4.94E-01 | 2.55 | 10.78 | 9.48E-03 |
| LOC102724719 | 5.45E-01 | 4.94E-01 | 2.55 | 10.78 | 9.48E-03 |
| MIR4791      | 5.44E-01 | 4.94E-01 | 2.55 | 10.75 | 9.55E-03 |
| LOC105379466 | 5.44E-01 | 4.94E-01 | 2.55 | 10.75 | 9.55E-03 |

|              |          |          |      |       |          |
|--------------|----------|----------|------|-------|----------|
| PRSS1        | 5.44E-01 | 4.94E-01 | 2.55 | 10.75 | 9.55E-03 |
| HLA.DPB1_2   | 5.44E-01 | 4.93E-01 | 2.55 | 10.74 | 9.57E-03 |
| SYNJ2.IT1    | 5.44E-01 | 4.93E-01 | 2.55 | 10.73 | 9.58E-03 |
| RIPPLY1      | 5.43E-01 | 4.93E-01 | 2.56 | 10.71 | 9.63E-03 |
| EFNA4        | 5.43E-01 | 4.93E-01 | 2.56 | 10.71 | 9.64E-03 |
| ALOX12B      | 5.43E-01 | 4.93E-01 | 2.56 | 10.71 | 9.65E-03 |
| TRAV6        | 5.43E-01 | 4.93E-01 | 2.56 | 10.71 | 9.65E-03 |
| SLC16A3      | 5.43E-01 | 4.92E-01 | 2.56 | 10.70 | 9.67E-03 |
| LOC105378319 | 5.43E-01 | 4.92E-01 | 2.56 | 10.69 | 9.68E-03 |
| LOC105378271 | 5.43E-01 | 4.92E-01 | 2.56 | 10.69 | 9.69E-03 |
| CDK4         | 5.43E-01 | 4.92E-01 | 2.56 | 10.68 | 9.70E-03 |
| LOC105369339 | 5.42E-01 | 4.91E-01 | 2.56 | 10.64 | 9.80E-03 |
| LOC102546299 | 5.42E-01 | 4.91E-01 | 2.56 | 10.64 | 9.81E-03 |
| LOC389765    | 5.42E-01 | 4.91E-01 | 2.56 | 10.64 | 9.82E-03 |
| IGKV2D.19    | 5.42E-01 | 4.91E-01 | 2.56 | 10.63 | 9.83E-03 |
| CALML3       | 5.41E-01 | 4.90E-01 | 2.56 | 10.62 | 9.85E-03 |
| MRPL53       | 5.41E-01 | 4.90E-01 | 2.56 | 10.62 | 9.85E-03 |
| LOC105373973 | 5.41E-01 | 4.90E-01 | 2.56 | 10.61 | 9.89E-03 |
| CDRT15L2     | 5.41E-01 | 4.90E-01 | 2.56 | 10.60 | 9.90E-03 |
| LOC105369673 | 5.41E-01 | 4.90E-01 | 2.56 | 10.59 | 9.93E-03 |
| TRP.CGG1.1   | 5.40E-01 | 4.89E-01 | 2.56 | 10.58 | 9.96E-03 |
| LOC107987433 | 5.40E-01 | 4.89E-01 | 2.57 | 10.57 | 9.98E-03 |
| RNU5E.1      | 5.40E-01 | 4.89E-01 | 2.57 | 10.56 | 1.00E-02 |
| HSPB9        | 5.40E-01 | 4.89E-01 | 2.57 | 10.56 | 1.00E-02 |
| SPRR1B       | 5.40E-01 | 4.88E-01 | 2.57 | 10.55 | 1.00E-02 |
| ADM2         | 5.40E-01 | 4.88E-01 | 2.57 | 10.54 | 1.00E-02 |
| LOC101928417 | 5.39E-01 | 4.88E-01 | 2.57 | 10.54 | 1.00E-02 |
| PAGE1        | 5.39E-01 | 4.88E-01 | 2.57 | 10.54 | 1.01E-02 |
| LOC107986411 | 5.38E-01 | 4.87E-01 | 2.57 | 10.50 | 1.02E-02 |
| CDIPT        | 5.38E-01 | 4.87E-01 | 2.57 | 10.49 | 1.02E-02 |
| OR2A2_1      | 5.38E-01 | 4.87E-01 | 2.57 | 10.48 | 1.02E-02 |
| KDM8         | 5.38E-01 | 4.86E-01 | 2.57 | 10.47 | 1.02E-02 |
| LOC105369182 | 5.38E-01 | 4.86E-01 | 2.57 | 10.47 | 1.02E-02 |
| PIR.FIGF     | 5.37E-01 | 4.86E-01 | 2.57 | 10.46 | 1.03E-02 |
| SNORD3B.2    | 5.37E-01 | 4.86E-01 | 2.57 | 10.45 | 1.03E-02 |
| LOC107986329 | 5.37E-01 | 4.86E-01 | 2.57 | 10.44 | 1.03E-02 |
| LOC107986621 | 5.37E-01 | 4.85E-01 | 2.57 | 10.43 | 1.03E-02 |
| FAM221A      | 5.37E-01 | 4.85E-01 | 2.57 | 10.43 | 1.03E-02 |
| LINC02259    | 5.36E-01 | 4.85E-01 | 2.58 | 10.40 | 1.04E-02 |
| PRAMEF19     | 5.36E-01 | 4.84E-01 | 2.58 | 10.40 | 1.04E-02 |
| HRCT1        | 5.35E-01 | 4.84E-01 | 2.58 | 10.36 | 1.05E-02 |

|              |          |          |      |       |          |
|--------------|----------|----------|------|-------|----------|
| LOC107987223 | 5.35E-01 | 4.84E-01 | 2.58 | 10.36 | 1.05E-02 |
| SNORD50B     | 5.35E-01 | 4.83E-01 | 2.58 | 10.36 | 1.05E-02 |
| LOC102724153 | 5.35E-01 | 4.83E-01 | 2.58 | 10.35 | 1.05E-02 |
| C11orf86     | 5.35E-01 | 4.83E-01 | 2.58 | 10.34 | 1.06E-02 |
| NAA80        | 5.34E-01 | 4.83E-01 | 2.58 | 10.33 | 1.06E-02 |
| SNORD115.10  | 5.34E-01 | 4.82E-01 | 2.58 | 10.30 | 1.07E-02 |
| LOC107984222 | 5.33E-01 | 4.81E-01 | 2.58 | 10.29 | 1.07E-02 |
| CENPV        | 5.33E-01 | 4.81E-01 | 2.58 | 10.28 | 1.07E-02 |
| PIGH         | 5.33E-01 | 4.81E-01 | 2.58 | 10.27 | 1.07E-02 |
| LOC105370195 | 5.33E-01 | 4.81E-01 | 2.58 | 10.27 | 1.07E-02 |
| LOC105369383 | 5.33E-01 | 4.81E-01 | 2.59 | 10.25 | 1.08E-02 |
| LOC105373053 | 5.33E-01 | 4.81E-01 | 2.59 | 10.25 | 1.08E-02 |
| IGLV3.1      | 5.32E-01 | 4.81E-01 | 2.59 | 10.25 | 1.08E-02 |
| MIR4268      | 5.32E-01 | 4.81E-01 | 2.59 | 10.25 | 1.08E-02 |
| MIR4320      | 5.32E-01 | 4.81E-01 | 2.59 | 10.25 | 1.08E-02 |
| LINC02400    | 5.32E-01 | 4.80E-01 | 2.59 | 10.23 | 1.09E-02 |
| LOC101930100 | 5.31E-01 | 4.79E-01 | 2.59 | 10.20 | 1.09E-02 |
| LINC00672    | 5.31E-01 | 4.79E-01 | 2.59 | 10.20 | 1.09E-02 |
| TSC22D3      | 5.31E-01 | 4.79E-01 | 2.59 | 10.19 | 1.10E-02 |
| LOC105373937 | 5.31E-01 | 4.79E-01 | 2.59 | 10.19 | 1.10E-02 |
| LOC728660    | 5.31E-01 | 4.79E-01 | 2.59 | 10.19 | 1.10E-02 |
| POT1.AS1     | 5.31E-01 | 4.78E-01 | 2.59 | 10.17 | 1.10E-02 |
| LOC107984716 | 5.31E-01 | 4.78E-01 | 2.59 | 10.17 | 1.10E-02 |
| MCM4         | 5.30E-01 | 4.78E-01 | 2.59 | 10.17 | 1.10E-02 |
| LY6E.DT      | 5.30E-01 | 4.78E-01 | 2.59 | 10.16 | 1.11E-02 |
| CERS3.AS1    | 5.30E-01 | 4.78E-01 | 2.59 | 10.15 | 1.11E-02 |
| PHACTR3.AS1  | 5.30E-01 | 4.78E-01 | 2.59 | 10.14 | 1.11E-02 |
| LOC105373770 | 5.30E-01 | 4.77E-01 | 2.59 | 10.13 | 1.11E-02 |
| GRAP2        | 5.29E-01 | 4.77E-01 | 2.59 | 10.13 | 1.11E-02 |
| LOC105373250 | 5.29E-01 | 4.77E-01 | 2.60 | 10.12 | 1.12E-02 |
| LOC105377501 | 5.29E-01 | 4.77E-01 | 2.60 | 10.12 | 1.12E-02 |
| PRL          | 5.29E-01 | 4.77E-01 | 2.60 | 10.12 | 1.12E-02 |
| PEMT         | 5.29E-01 | 4.77E-01 | 2.60 | 10.11 | 1.12E-02 |
| LOC105369686 | 5.29E-01 | 4.76E-01 | 2.60 | 10.09 | 1.12E-02 |
| KIR3DS1      | 5.29E-01 | 4.76E-01 | 2.60 | 10.09 | 1.12E-02 |
| CDX1         | 5.29E-01 | 4.76E-01 | 2.60 | 10.09 | 1.13E-02 |
| LOC112268325 | 5.28E-01 | 4.76E-01 | 2.60 | 10.08 | 1.13E-02 |
| OR3A4P       | 5.28E-01 | 4.75E-01 | 2.60 | 10.06 | 1.13E-02 |
| CAPSL        | 5.28E-01 | 4.75E-01 | 2.60 | 10.06 | 1.13E-02 |
| IGKV3D.31    | 5.27E-01 | 4.74E-01 | 2.60 | 10.02 | 1.14E-02 |
| CCDC105      | 5.27E-01 | 4.74E-01 | 2.60 | 10.02 | 1.14E-02 |

|              |          |          |      |       |          |
|--------------|----------|----------|------|-------|----------|
| SNORD103C    | 5.27E-01 | 4.74E-01 | 2.60 | 10.01 | 1.15E-02 |
| LOC105371311 | 5.25E-01 | 4.73E-01 | 2.61 | 9.97  | 1.16E-02 |
| PRSS38       | 5.25E-01 | 4.73E-01 | 2.61 | 9.96  | 1.16E-02 |
| AP3S2        | 5.25E-01 | 4.72E-01 | 2.61 | 9.94  | 1.17E-02 |
| LINC01958    | 5.25E-01 | 4.72E-01 | 2.61 | 9.94  | 1.17E-02 |
| SLC12A5.AS1  | 5.25E-01 | 4.72E-01 | 2.61 | 9.94  | 1.17E-02 |
| LOC105378906 | 5.25E-01 | 4.72E-01 | 2.61 | 9.93  | 1.17E-02 |
| LINC01484    | 5.24E-01 | 4.72E-01 | 2.61 | 9.93  | 1.17E-02 |
| APOA2        | 5.24E-01 | 4.72E-01 | 2.61 | 9.92  | 1.17E-02 |
| LOC107985945 | 5.24E-01 | 4.71E-01 | 2.61 | 9.92  | 1.17E-02 |
| AGAP13P      | 5.24E-01 | 4.71E-01 | 2.61 | 9.91  | 1.18E-02 |
| IGLV3.17     | 5.24E-01 | 4.71E-01 | 2.61 | 9.91  | 1.18E-02 |
| LOC105369976 | 5.24E-01 | 4.71E-01 | 2.61 | 9.90  | 1.18E-02 |
| OVOS2        | 5.23E-01 | 4.70E-01 | 2.61 | 9.87  | 1.19E-02 |
| LOC729609    | 5.23E-01 | 4.70E-01 | 2.61 | 9.87  | 1.19E-02 |
| LOC149684    | 5.23E-01 | 4.70E-01 | 2.61 | 9.86  | 1.19E-02 |
| LOC105377342 | 5.23E-01 | 4.70E-01 | 2.61 | 9.86  | 1.19E-02 |
| C17orf58     | 5.23E-01 | 4.70E-01 | 2.61 | 9.86  | 1.19E-02 |
| LOC105374811 | 5.23E-01 | 4.70E-01 | 2.61 | 9.86  | 1.19E-02 |
| LINC01164    | 5.23E-01 | 4.70E-01 | 2.61 | 9.85  | 1.19E-02 |
| PET117       | 5.23E-01 | 4.70E-01 | 2.61 | 9.85  | 1.19E-02 |
| RBMXL2       | 5.22E-01 | 4.69E-01 | 2.61 | 9.85  | 1.20E-02 |
| PRKAG2.AS1   | 5.22E-01 | 4.69E-01 | 2.61 | 9.84  | 1.20E-02 |
| CSF1         | 5.22E-01 | 4.69E-01 | 2.62 | 9.83  | 1.20E-02 |
| LOC105370957 | 5.22E-01 | 4.69E-01 | 2.62 | 9.82  | 1.20E-02 |
| LINC02128    | 5.22E-01 | 4.69E-01 | 2.62 | 9.82  | 1.21E-02 |
| CCL3L1       | 5.22E-01 | 4.68E-01 | 2.62 | 9.81  | 1.21E-02 |
| LOC107984833 | 5.21E-01 | 4.68E-01 | 2.62 | 9.80  | 1.21E-02 |
| TMPRSS2      | 5.21E-01 | 4.68E-01 | 2.62 | 9.78  | 1.22E-02 |
| LINC02541    | 5.21E-01 | 4.68E-01 | 2.62 | 9.78  | 1.22E-02 |
| ZNF326       | 5.21E-01 | 4.67E-01 | 2.62 | 9.78  | 1.22E-02 |
| LOC107985203 | 5.20E-01 | 4.67E-01 | 2.62 | 9.77  | 1.22E-02 |
| LOC107984625 | 5.20E-01 | 4.67E-01 | 2.62 | 9.76  | 1.22E-02 |
| NOTO         | 5.20E-01 | 4.67E-01 | 2.62 | 9.75  | 1.23E-02 |
| LOC105372686 | 5.20E-01 | 4.67E-01 | 2.62 | 9.75  | 1.23E-02 |
| LOC105369975 | 5.20E-01 | 4.67E-01 | 2.62 | 9.75  | 1.23E-02 |
| RNF113B      | 5.20E-01 | 4.66E-01 | 2.62 | 9.74  | 1.23E-02 |
| LINC02755    | 5.19E-01 | 4.66E-01 | 2.62 | 9.73  | 1.23E-02 |
| LOC107984202 | 5.19E-01 | 4.66E-01 | 2.62 | 9.73  | 1.23E-02 |
| ARFIP2       | 5.19E-01 | 4.66E-01 | 2.62 | 9.72  | 1.24E-02 |
| MIR8054      | 5.19E-01 | 4.66E-01 | 2.62 | 9.72  | 1.24E-02 |



|               |          |          |      |      |          |
|---------------|----------|----------|------|------|----------|
| LOC102723996  | 5.19E-01 | 4.65E-01 | 2.62 | 9.71 | 1.24E-02 |
| SNORA95       | 5.19E-01 | 4.65E-01 | 2.62 | 9.70 | 1.24E-02 |
| FKBP1A        | 5.19E-01 | 4.65E-01 | 2.62 | 9.69 | 1.25E-02 |
| NEUROD6       | 5.18E-01 | 4.65E-01 | 2.63 | 9.68 | 1.25E-02 |
| PDZD4         | 5.18E-01 | 4.65E-01 | 2.63 | 9.68 | 1.25E-02 |
| LOC105376353  | 5.18E-01 | 4.65E-01 | 2.63 | 9.68 | 1.25E-02 |
| CKS1B         | 5.18E-01 | 4.64E-01 | 2.63 | 9.67 | 1.25E-02 |
| CORO1A        | 5.18E-01 | 4.64E-01 | 2.63 | 9.66 | 1.26E-02 |
| LOC105372236  | 5.18E-01 | 4.64E-01 | 2.63 | 9.65 | 1.26E-02 |
| MIR4694       | 5.18E-01 | 4.64E-01 | 2.63 | 9.65 | 1.26E-02 |
| LINC01381     | 5.17E-01 | 4.64E-01 | 2.63 | 9.65 | 1.26E-02 |
| CTD.2350J17.1 | 5.17E-01 | 4.64E-01 | 2.63 | 9.65 | 1.26E-02 |
| PNMA8B        | 5.17E-01 | 4.64E-01 | 2.63 | 9.65 | 1.26E-02 |
| LOC105372084  | 5.17E-01 | 4.64E-01 | 2.63 | 9.64 | 1.26E-02 |
| LOC105370600  | 5.17E-01 | 4.64E-01 | 2.63 | 9.64 | 1.26E-02 |
| LOC107986097  | 5.17E-01 | 4.63E-01 | 2.63 | 9.63 | 1.26E-02 |
| LOC107986178  | 5.17E-01 | 4.63E-01 | 2.63 | 9.63 | 1.27E-02 |
| SMPX          | 5.17E-01 | 4.63E-01 | 2.63 | 9.62 | 1.27E-02 |
| TSPAN32       | 5.17E-01 | 4.63E-01 | 2.63 | 9.62 | 1.27E-02 |
| NDUFB8        | 5.16E-01 | 4.63E-01 | 2.63 | 9.61 | 1.27E-02 |
| PXMP2         | 5.16E-01 | 4.63E-01 | 2.63 | 9.60 | 1.27E-02 |
| MIR4282       | 5.16E-01 | 4.62E-01 | 2.63 | 9.60 | 1.28E-02 |
| CA5BP1.CA5B   | 5.16E-01 | 4.62E-01 | 2.63 | 9.60 | 1.28E-02 |
| LOC105373856  | 5.16E-01 | 4.62E-01 | 2.63 | 9.59 | 1.28E-02 |
| LOC100506100  | 5.16E-01 | 4.62E-01 | 2.63 | 9.59 | 1.28E-02 |
| DPP3          | 5.16E-01 | 4.62E-01 | 2.63 | 9.59 | 1.28E-02 |
| DEFB106A      | 5.16E-01 | 4.62E-01 | 2.63 | 9.59 | 1.28E-02 |
| OCIAD1.AS1    | 5.15E-01 | 4.62E-01 | 2.63 | 9.57 | 1.29E-02 |
| MIPEPP3       | 5.15E-01 | 4.61E-01 | 2.63 | 9.57 | 1.29E-02 |
| DKFZp434L192  | 5.15E-01 | 4.61E-01 | 2.63 | 9.56 | 1.29E-02 |
| CDAN1         | 5.15E-01 | 4.61E-01 | 2.63 | 9.56 | 1.29E-02 |
| PSME3         | 5.15E-01 | 4.61E-01 | 2.63 | 9.55 | 1.29E-02 |
| MAPK11        | 5.15E-01 | 4.61E-01 | 2.63 | 9.55 | 1.29E-02 |
| LOC102723536  | 5.15E-01 | 4.61E-01 | 2.64 | 9.55 | 1.29E-02 |
| RELB          | 5.15E-01 | 4.61E-01 | 2.64 | 9.54 | 1.29E-02 |
| LOC105379083  | 5.15E-01 | 4.61E-01 | 2.64 | 9.54 | 1.30E-02 |
| LOC102723665  | 5.14E-01 | 4.61E-01 | 2.64 | 9.54 | 1.30E-02 |
| LOC112268243  | 5.14E-01 | 4.60E-01 | 2.64 | 9.51 | 1.31E-02 |
| LOC107987143  | 5.14E-01 | 4.60E-01 | 2.64 | 9.51 | 1.31E-02 |
| LOC283299_2   | 5.14E-01 | 4.60E-01 | 2.64 | 9.50 | 1.31E-02 |
| LOC105379435  | 5.14E-01 | 4.60E-01 | 2.64 | 9.50 | 1.31E-02 |

|              |          |          |      |      |          |
|--------------|----------|----------|------|------|----------|
| RPL10L       | 5.13E-01 | 4.59E-01 | 2.64 | 9.48 | 1.31E-02 |
| C4B_2_1      | 5.13E-01 | 4.59E-01 | 2.64 | 9.48 | 1.32E-02 |
| C4B_3        | 5.13E-01 | 4.59E-01 | 2.64 | 9.48 | 1.32E-02 |
| CADM2.AS2    | 5.13E-01 | 4.59E-01 | 2.64 | 9.48 | 1.32E-02 |
| LINC00499    | 5.13E-01 | 4.59E-01 | 2.64 | 9.47 | 1.32E-02 |
| RRN3P3       | 5.12E-01 | 4.58E-01 | 2.64 | 9.45 | 1.32E-02 |
| LOC102723564 | 5.12E-01 | 4.58E-01 | 2.64 | 9.45 | 1.32E-02 |
| SNORD38B     | 5.12E-01 | 4.58E-01 | 2.64 | 9.45 | 1.32E-02 |
| GUSBP16      | 5.12E-01 | 4.58E-01 | 2.64 | 9.45 | 1.32E-02 |
| LOC105372470 | 5.12E-01 | 4.58E-01 | 2.64 | 9.45 | 1.33E-02 |
| LRIT2        | 5.12E-01 | 4.58E-01 | 2.64 | 9.44 | 1.33E-02 |
| MFAP4        | 5.12E-01 | 4.58E-01 | 2.64 | 9.44 | 1.33E-02 |
| LOC101928855 | 5.12E-01 | 4.57E-01 | 2.64 | 9.43 | 1.33E-02 |
| MIDN         | 5.12E-01 | 4.57E-01 | 2.64 | 9.43 | 1.33E-02 |
| LOC107986817 | 5.12E-01 | 4.57E-01 | 2.64 | 9.42 | 1.34E-02 |
| HSD17B3.AS1  | 5.11E-01 | 4.57E-01 | 2.64 | 9.41 | 1.34E-02 |
| ALDH3B2      | 5.11E-01 | 4.57E-01 | 2.65 | 9.41 | 1.34E-02 |
| LINC02126    | 5.11E-01 | 4.57E-01 | 2.65 | 9.40 | 1.34E-02 |
| EPN2.IT1     | 5.11E-01 | 4.57E-01 | 2.65 | 9.40 | 1.34E-02 |
| LOC105372283 | 5.11E-01 | 4.56E-01 | 2.65 | 9.39 | 1.35E-02 |
| NAA25        | 5.11E-01 | 4.56E-01 | 2.65 | 9.39 | 1.35E-02 |
| LOC105378883 | 5.10E-01 | 4.56E-01 | 2.65 | 9.37 | 1.35E-02 |
| LOC105376876 | 5.10E-01 | 4.56E-01 | 2.65 | 9.37 | 1.35E-02 |
| LOC107985579 | 5.10E-01 | 4.56E-01 | 2.65 | 9.37 | 1.35E-02 |
| TMEM52       | 5.10E-01 | 4.56E-01 | 2.65 | 9.37 | 1.35E-02 |
| H2AZ1.DT     | 5.10E-01 | 4.56E-01 | 2.65 | 9.37 | 1.35E-02 |
| S100A1       | 5.09E-01 | 4.55E-01 | 2.65 | 9.35 | 1.36E-02 |
| TRV.CAC1.1   | 5.09E-01 | 4.55E-01 | 2.65 | 9.35 | 1.36E-02 |
| MIR802       | 5.09E-01 | 4.55E-01 | 2.65 | 9.35 | 1.36E-02 |
| LILRB4_2     | 5.09E-01 | 4.55E-01 | 2.65 | 9.35 | 1.36E-02 |
| TSN          | 5.09E-01 | 4.55E-01 | 2.65 | 9.35 | 1.36E-02 |
| MIR3713      | 5.09E-01 | 4.55E-01 | 2.65 | 9.34 | 1.37E-02 |
| DOCK8.AS1    | 5.09E-01 | 4.55E-01 | 2.65 | 9.34 | 1.37E-02 |
| SCNM1        | 5.09E-01 | 4.54E-01 | 2.65 | 9.32 | 1.37E-02 |
| LOC105377940 | 5.09E-01 | 4.54E-01 | 2.65 | 9.32 | 1.37E-02 |
| PPIAL4C      | 5.09E-01 | 4.54E-01 | 2.65 | 9.31 | 1.38E-02 |
| BCL2L10      | 5.08E-01 | 4.54E-01 | 2.65 | 9.31 | 1.38E-02 |
| NADK2        | 5.08E-01 | 4.53E-01 | 2.65 | 9.29 | 1.38E-02 |
| DONSON       | 5.08E-01 | 4.53E-01 | 2.65 | 9.28 | 1.39E-02 |
| SPRR3        | 5.08E-01 | 4.53E-01 | 2.65 | 9.28 | 1.39E-02 |
| TMEM30CP     | 5.08E-01 | 4.53E-01 | 2.65 | 9.28 | 1.39E-02 |

|              |          |          |      |      |          |
|--------------|----------|----------|------|------|----------|
| LOC105371382 | 5.08E-01 | 4.53E-01 | 2.65 | 9.28 | 1.39E-02 |
| CDHR5        | 5.08E-01 | 4.53E-01 | 2.65 | 9.28 | 1.39E-02 |
| FUT8         | 5.07E-01 | 4.53E-01 | 2.65 | 9.27 | 1.39E-02 |
| LOC102724363 | 5.07E-01 | 4.53E-01 | 2.65 | 9.27 | 1.39E-02 |
| IPW          | 5.07E-01 | 4.52E-01 | 2.66 | 9.25 | 1.40E-02 |
| LOC100132078 | 5.06E-01 | 4.51E-01 | 2.66 | 9.23 | 1.41E-02 |
| GDPD2        | 5.06E-01 | 4.51E-01 | 2.66 | 9.23 | 1.41E-02 |
| LOC107987384 | 5.06E-01 | 4.51E-01 | 2.66 | 9.21 | 1.41E-02 |
| LOC105370340 | 5.05E-01 | 4.50E-01 | 2.66 | 9.19 | 1.42E-02 |
| SLC25A2      | 5.05E-01 | 4.50E-01 | 2.66 | 9.18 | 1.42E-02 |
| LOC105377178 | 5.05E-01 | 4.50E-01 | 2.66 | 9.18 | 1.42E-02 |
| LOC105375107 | 5.05E-01 | 4.50E-01 | 2.66 | 9.18 | 1.42E-02 |
| RPL35        | 5.05E-01 | 4.50E-01 | 2.66 | 9.18 | 1.43E-02 |
| AGAP6        | 5.05E-01 | 4.50E-01 | 2.66 | 9.17 | 1.43E-02 |
| CCL18_1      | 5.04E-01 | 4.49E-01 | 2.66 | 9.15 | 1.44E-02 |
| CAMTA1       | 5.04E-01 | 4.49E-01 | 2.66 | 9.15 | 1.44E-02 |
| LOC105375701 | 5.04E-01 | 4.49E-01 | 2.66 | 9.14 | 1.44E-02 |
| LOC102723714 | 5.04E-01 | 4.49E-01 | 2.66 | 9.14 | 1.44E-02 |
| LOC105370738 | 5.04E-01 | 4.49E-01 | 2.66 | 9.14 | 1.44E-02 |
| PIP          | 5.04E-01 | 4.49E-01 | 2.66 | 9.14 | 1.44E-02 |
| LOC101927623 | 5.04E-01 | 4.48E-01 | 2.67 | 9.13 | 1.44E-02 |
| TAS1R3       | 5.03E-01 | 4.48E-01 | 2.67 | 9.12 | 1.45E-02 |
| LOC105377411 | 5.03E-01 | 4.48E-01 | 2.67 | 9.12 | 1.45E-02 |
| LOC105378728 | 5.03E-01 | 4.48E-01 | 2.67 | 9.11 | 1.45E-02 |
| RPL13        | 5.03E-01 | 4.48E-01 | 2.67 | 9.11 | 1.45E-02 |
| LOC105373060 | 5.03E-01 | 4.47E-01 | 2.67 | 9.10 | 1.46E-02 |
| KRT73.AS1    | 5.02E-01 | 4.47E-01 | 2.67 | 9.09 | 1.46E-02 |
| ZMYND10      | 5.02E-01 | 4.47E-01 | 2.67 | 9.08 | 1.46E-02 |
| LINC00571    | 5.02E-01 | 4.47E-01 | 2.67 | 9.08 | 1.46E-02 |
| LOC101928397 | 5.02E-01 | 4.47E-01 | 2.67 | 9.07 | 1.47E-02 |
| LOC100128993 | 5.02E-01 | 4.47E-01 | 2.67 | 9.07 | 1.47E-02 |
| LOC105373887 | 5.01E-01 | 4.46E-01 | 2.67 | 9.05 | 1.48E-02 |
| MACROH2A2    | 5.01E-01 | 4.45E-01 | 2.67 | 9.03 | 1.49E-02 |
| LOC105371378 | 5.01E-01 | 4.45E-01 | 2.67 | 9.03 | 1.49E-02 |
| LOC105378394 | 5.01E-01 | 4.45E-01 | 2.67 | 9.03 | 1.49E-02 |
| HSF2BP       | 5.01E-01 | 4.45E-01 | 2.67 | 9.02 | 1.49E-02 |
| FADD         | 5.00E-01 | 4.45E-01 | 2.67 | 9.01 | 1.49E-02 |
| LRRC37A6P    | 5.00E-01 | 4.45E-01 | 2.67 | 9.01 | 1.49E-02 |
| SIK1B        | 5.00E-01 | 4.45E-01 | 2.67 | 9.01 | 1.49E-02 |
| LOC101928881 | 5.00E-01 | 4.45E-01 | 2.67 | 9.00 | 1.49E-02 |
| LOC107986892 | 5.00E-01 | 4.44E-01 | 2.67 | 9.00 | 1.50E-02 |

|              |          |          |      |      |          |
|--------------|----------|----------|------|------|----------|
| PCOLCE2      | 5.00E-01 | 4.44E-01 | 2.67 | 9.00 | 1.50E-02 |
| ARL14        | 5.00E-01 | 4.44E-01 | 2.68 | 8.99 | 1.50E-02 |
| LOC105377814 | 5.00E-01 | 4.44E-01 | 2.68 | 8.99 | 1.50E-02 |
| MAGEB6       | 4.99E-01 | 4.44E-01 | 2.68 | 8.98 | 1.50E-02 |
| PPM1M        | 4.99E-01 | 4.44E-01 | 2.68 | 8.97 | 1.51E-02 |
| LOC101927248 | 4.99E-01 | 4.44E-01 | 2.68 | 8.97 | 1.51E-02 |
| SDCBP2.AS1   | 4.99E-01 | 4.43E-01 | 2.68 | 8.96 | 1.51E-02 |
| MIR202HG     | 4.99E-01 | 4.43E-01 | 2.68 | 8.96 | 1.51E-02 |
| YRDC         | 4.99E-01 | 4.43E-01 | 2.68 | 8.95 | 1.52E-02 |
| LOC105378971 | 4.97E-01 | 4.42E-01 | 2.68 | 8.91 | 1.53E-02 |
| LOC105378132 | 4.97E-01 | 4.42E-01 | 2.68 | 8.91 | 1.53E-02 |
| LOC105379513 | 4.97E-01 | 4.41E-01 | 2.68 | 8.90 | 1.54E-02 |
| LOC102724768 | 4.97E-01 | 4.41E-01 | 2.68 | 8.90 | 1.54E-02 |
| LOC105371380 | 4.97E-01 | 4.41E-01 | 2.68 | 8.89 | 1.54E-02 |
| LOC101927548 | 4.97E-01 | 4.41E-01 | 2.68 | 8.88 | 1.54E-02 |
| LOC105376400 | 4.97E-01 | 4.41E-01 | 2.68 | 8.88 | 1.54E-02 |
| LAIR1        | 4.96E-01 | 4.40E-01 | 2.68 | 8.87 | 1.55E-02 |
| LOC100272217 | 4.96E-01 | 4.40E-01 | 2.69 | 8.85 | 1.56E-02 |
| FLJ42351     | 4.96E-01 | 4.40E-01 | 2.69 | 8.85 | 1.56E-02 |
| LOC101926977 | 4.96E-01 | 4.40E-01 | 2.69 | 8.84 | 1.56E-02 |
| ATF7IP       | 4.96E-01 | 4.40E-01 | 2.69 | 8.84 | 1.56E-02 |
| RAB25        | 4.96E-01 | 4.39E-01 | 2.69 | 8.84 | 1.56E-02 |
| FLJ37453     | 4.95E-01 | 4.39E-01 | 2.69 | 8.83 | 1.57E-02 |
| LOC105373096 | 4.95E-01 | 4.39E-01 | 2.69 | 8.82 | 1.57E-02 |
| LOC107985646 | 4.95E-01 | 4.38E-01 | 2.69 | 8.81 | 1.58E-02 |
| LOC105369405 | 4.94E-01 | 4.38E-01 | 2.69 | 8.80 | 1.58E-02 |
| CFAP99       | 4.94E-01 | 4.38E-01 | 2.69 | 8.80 | 1.58E-02 |
| MYO5C        | 4.94E-01 | 4.38E-01 | 2.69 | 8.80 | 1.58E-02 |
| LOC105374974 | 4.94E-01 | 4.38E-01 | 2.69 | 8.79 | 1.58E-02 |
| GMPPA        | 4.94E-01 | 4.38E-01 | 2.69 | 8.79 | 1.59E-02 |
| LINC02033    | 4.94E-01 | 4.38E-01 | 2.69 | 8.78 | 1.59E-02 |
| DLGAP1.AS4   | 4.94E-01 | 4.37E-01 | 2.69 | 8.77 | 1.59E-02 |
| LOC107987262 | 4.94E-01 | 4.37E-01 | 2.69 | 8.77 | 1.59E-02 |
| CLEC18C      | 4.93E-01 | 4.37E-01 | 2.69 | 8.76 | 1.60E-02 |
| ARNTL2.AS1   | 4.93E-01 | 4.37E-01 | 2.69 | 8.76 | 1.60E-02 |
| TRK.CTT1.1   | 4.93E-01 | 4.37E-01 | 2.69 | 8.75 | 1.60E-02 |
| FBXL16       | 4.93E-01 | 4.36E-01 | 2.69 | 8.74 | 1.60E-02 |
| SERTAD3      | 4.93E-01 | 4.36E-01 | 2.69 | 8.74 | 1.61E-02 |
| MRAP         | 4.93E-01 | 4.36E-01 | 2.69 | 8.74 | 1.61E-02 |
| LOC105371554 | 4.92E-01 | 4.36E-01 | 2.69 | 8.73 | 1.61E-02 |
| LOC105373894 | 4.92E-01 | 4.36E-01 | 2.70 | 8.73 | 1.61E-02 |

|                |          |          |      |      |          |
|----------------|----------|----------|------|------|----------|
| LOC105375038   | 4.92E-01 | 4.36E-01 | 2.70 | 8.72 | 1.61E-02 |
| TRNW           | 4.92E-01 | 4.35E-01 | 2.70 | 8.71 | 1.62E-02 |
| LOC105370525   | 4.91E-01 | 4.35E-01 | 2.70 | 8.69 | 1.63E-02 |
| LOC107986758   | 4.91E-01 | 4.35E-01 | 2.70 | 8.69 | 1.63E-02 |
| LOC644277      | 4.91E-01 | 4.34E-01 | 2.70 | 8.67 | 1.64E-02 |
| LINC01609      | 4.91E-01 | 4.34E-01 | 2.70 | 8.67 | 1.64E-02 |
| MICA.AS1_2     | 4.91E-01 | 4.34E-01 | 2.70 | 8.67 | 1.64E-02 |
| IGKV1D.43      | 4.91E-01 | 4.34E-01 | 2.70 | 8.66 | 1.64E-02 |
| LOC105374295   | 4.90E-01 | 4.33E-01 | 2.70 | 8.65 | 1.65E-02 |
| MIR4765        | 4.89E-01 | 4.32E-01 | 2.70 | 8.62 | 1.66E-02 |
| MIR548V        | 4.89E-01 | 4.32E-01 | 2.70 | 8.61 | 1.66E-02 |
| LOC112267931   | 4.89E-01 | 4.32E-01 | 2.70 | 8.61 | 1.66E-02 |
| LOC107987069   | 4.89E-01 | 4.32E-01 | 2.70 | 8.61 | 1.67E-02 |
| LOC105370613   | 4.89E-01 | 4.32E-01 | 2.71 | 8.60 | 1.67E-02 |
| MCEE           | 4.88E-01 | 4.32E-01 | 2.71 | 8.59 | 1.67E-02 |
| SNORA117       | 4.88E-01 | 4.31E-01 | 2.71 | 8.58 | 1.68E-02 |
| LOC105375799_1 | 4.88E-01 | 4.31E-01 | 2.71 | 8.58 | 1.68E-02 |
| LINC00280      | 4.88E-01 | 4.31E-01 | 2.71 | 8.58 | 1.68E-02 |
| ADIRF          | 4.88E-01 | 4.31E-01 | 2.71 | 8.58 | 1.68E-02 |
| TMC4           | 4.88E-01 | 4.31E-01 | 2.71 | 8.58 | 1.68E-02 |
| LOC107984714   | 4.88E-01 | 4.31E-01 | 2.71 | 8.58 | 1.68E-02 |
| ZNF676         | 4.88E-01 | 4.31E-01 | 2.71 | 8.57 | 1.68E-02 |
| LINC02123      | 4.88E-01 | 4.31E-01 | 2.71 | 8.57 | 1.68E-02 |
| PABPC1L2B      | 4.87E-01 | 4.30E-01 | 2.71 | 8.55 | 1.69E-02 |
| MUC12.AS1      | 4.87E-01 | 4.30E-01 | 2.71 | 8.54 | 1.70E-02 |
| LOC105377479   | 4.87E-01 | 4.30E-01 | 2.71 | 8.53 | 1.70E-02 |
| LOC107984469   | 4.86E-01 | 4.29E-01 | 2.71 | 8.52 | 1.71E-02 |
| LOC105375571   | 4.86E-01 | 4.29E-01 | 2.71 | 8.51 | 1.71E-02 |
| CLEC12A.AS1    | 4.86E-01 | 4.29E-01 | 2.71 | 8.51 | 1.71E-02 |
| SNORD140       | 4.86E-01 | 4.29E-01 | 2.71 | 8.51 | 1.71E-02 |
| LOC107984876   | 4.86E-01 | 4.29E-01 | 2.71 | 8.50 | 1.71E-02 |
| LOC107984855   | 4.86E-01 | 4.29E-01 | 2.71 | 8.50 | 1.72E-02 |
| SNORD58A       | 4.86E-01 | 4.29E-01 | 2.71 | 8.50 | 1.72E-02 |
| LOC107986630   | 4.86E-01 | 4.28E-01 | 2.71 | 8.50 | 1.72E-02 |
| LOC102723313   | 4.86E-01 | 4.28E-01 | 2.71 | 8.49 | 1.72E-02 |
| NIPA1          | 4.85E-01 | 4.28E-01 | 2.71 | 8.49 | 1.72E-02 |
| LOC101929348   | 4.85E-01 | 4.28E-01 | 2.71 | 8.48 | 1.73E-02 |
| GPR149         | 4.85E-01 | 4.27E-01 | 2.72 | 8.46 | 1.73E-02 |
| LOC105379539   | 4.84E-01 | 4.27E-01 | 2.72 | 8.45 | 1.74E-02 |
| LOC101927727   | 4.84E-01 | 4.27E-01 | 2.72 | 8.45 | 1.74E-02 |
| HLA3           | 4.84E-01 | 4.27E-01 | 2.72 | 8.45 | 1.74E-02 |

|              |          |          |      |      |          |
|--------------|----------|----------|------|------|----------|
| XIST         | 4.84E-01 | 4.27E-01 | 2.72 | 8.44 | 1.74E-02 |
| LINC01698    | 4.84E-01 | 4.27E-01 | 2.72 | 8.44 | 1.75E-02 |
| CTSD         | 4.83E-01 | 4.25E-01 | 2.72 | 8.40 | 1.77E-02 |
| FBXL12       | 4.82E-01 | 4.25E-01 | 2.72 | 8.38 | 1.77E-02 |
| LOC105377975 | 4.82E-01 | 4.25E-01 | 2.72 | 8.38 | 1.77E-02 |
| NOC2L        | 4.82E-01 | 4.25E-01 | 2.72 | 8.38 | 1.78E-02 |
| RPL7L1       | 4.82E-01 | 4.24E-01 | 2.72 | 8.38 | 1.78E-02 |
| LOC105371106 | 4.82E-01 | 4.24E-01 | 2.72 | 8.37 | 1.78E-02 |
| GACAT2       | 4.81E-01 | 4.24E-01 | 2.72 | 8.36 | 1.79E-02 |
| FLJ36000     | 4.81E-01 | 4.24E-01 | 2.72 | 8.35 | 1.79E-02 |
| RYR3.DT      | 4.81E-01 | 4.24E-01 | 2.72 | 8.35 | 1.79E-02 |
| LOC100287015 | 4.81E-01 | 4.24E-01 | 2.72 | 8.35 | 1.79E-02 |
| LOC105370066 | 4.81E-01 | 4.23E-01 | 2.72 | 8.34 | 1.79E-02 |
| LOC107986935 | 4.81E-01 | 4.23E-01 | 2.72 | 8.34 | 1.79E-02 |
| LOC105377106 | 4.81E-01 | 4.23E-01 | 2.73 | 8.34 | 1.80E-02 |
| HERC2P2_1    | 4.81E-01 | 4.23E-01 | 2.73 | 8.33 | 1.80E-02 |
| LOC100335030 | 4.81E-01 | 4.23E-01 | 2.73 | 8.33 | 1.80E-02 |
| CLDN5        | 4.80E-01 | 4.23E-01 | 2.73 | 8.32 | 1.80E-02 |
| LOC112268172 | 4.80E-01 | 4.22E-01 | 2.73 | 8.31 | 1.81E-02 |
| LINC00885    | 4.80E-01 | 4.22E-01 | 2.73 | 8.31 | 1.81E-02 |
| KIFC3        | 4.80E-01 | 4.22E-01 | 2.73 | 8.31 | 1.81E-02 |
| NPIPA1_1     | 4.80E-01 | 4.22E-01 | 2.73 | 8.30 | 1.81E-02 |
| GSTTP2       | 4.80E-01 | 4.22E-01 | 2.73 | 8.30 | 1.82E-02 |
| LOC100506178 | 4.80E-01 | 4.22E-01 | 2.73 | 8.30 | 1.82E-02 |
| MIR609       | 4.79E-01 | 4.22E-01 | 2.73 | 8.29 | 1.82E-02 |
| MIR320E      | 4.79E-01 | 4.22E-01 | 2.73 | 8.29 | 1.82E-02 |
| LINC02086    | 4.79E-01 | 4.21E-01 | 2.73 | 8.29 | 1.82E-02 |
| MBOAT2       | 4.79E-01 | 4.21E-01 | 2.73 | 8.28 | 1.82E-02 |
| LOC105378550 | 4.79E-01 | 4.21E-01 | 2.73 | 8.28 | 1.82E-02 |
| LOC554206    | 4.79E-01 | 4.21E-01 | 2.73 | 8.28 | 1.82E-02 |
| SF3A2        | 4.79E-01 | 4.21E-01 | 2.73 | 8.28 | 1.83E-02 |
| FBXW7        | 4.79E-01 | 4.21E-01 | 2.73 | 8.27 | 1.83E-02 |
| LOC102724151 | 4.79E-01 | 4.21E-01 | 2.73 | 8.27 | 1.83E-02 |
| SNORD13F     | 4.79E-01 | 4.21E-01 | 2.73 | 8.27 | 1.83E-02 |
| TMEM265      | 4.78E-01 | 4.20E-01 | 2.73 | 8.26 | 1.84E-02 |
| LINC00977    | 4.78E-01 | 4.20E-01 | 2.73 | 8.25 | 1.84E-02 |
| GOS2         | 4.78E-01 | 4.20E-01 | 2.73 | 8.25 | 1.84E-02 |
| SNTB2        | 4.78E-01 | 4.20E-01 | 2.73 | 8.25 | 1.84E-02 |
| LOC105370958 | 4.78E-01 | 4.20E-01 | 2.73 | 8.24 | 1.85E-02 |
| ZNF630.AS1   | 4.78E-01 | 4.20E-01 | 2.73 | 8.23 | 1.85E-02 |
| SPINK2       | 4.78E-01 | 4.20E-01 | 2.73 | 8.23 | 1.85E-02 |

|              |          |          |      |      |          |
|--------------|----------|----------|------|------|----------|
| CNIH2        | 4.77E-01 | 4.19E-01 | 2.73 | 8.22 | 1.85E-02 |
| RPS4X        | 4.77E-01 | 4.19E-01 | 2.73 | 8.22 | 1.86E-02 |
| NSG1         | 4.77E-01 | 4.19E-01 | 2.73 | 8.22 | 1.86E-02 |
| DRAIC        | 4.76E-01 | 4.18E-01 | 2.74 | 8.19 | 1.87E-02 |
| SPOCD1       | 4.76E-01 | 4.18E-01 | 2.74 | 8.19 | 1.87E-02 |
| S100A11      | 4.76E-01 | 4.18E-01 | 2.74 | 8.18 | 1.88E-02 |
| LOC105377721 | 4.76E-01 | 4.17E-01 | 2.74 | 8.17 | 1.88E-02 |
| ENTPD8       | 4.76E-01 | 4.17E-01 | 2.74 | 8.17 | 1.88E-02 |
| TAS1R2       | 4.75E-01 | 4.17E-01 | 2.74 | 8.15 | 1.89E-02 |
| EFCAB3       | 4.75E-01 | 4.17E-01 | 2.74 | 8.15 | 1.89E-02 |
| RAB9BP1      | 4.75E-01 | 4.17E-01 | 2.74 | 8.15 | 1.89E-02 |
| SPNS2        | 4.75E-01 | 4.16E-01 | 2.74 | 8.13 | 1.90E-02 |
| LINC01297    | 4.74E-01 | 4.16E-01 | 2.74 | 8.12 | 1.91E-02 |
| TRIM74       | 4.74E-01 | 4.16E-01 | 2.74 | 8.12 | 1.91E-02 |
| LOC105373742 | 4.74E-01 | 4.15E-01 | 2.74 | 8.11 | 1.92E-02 |
| LOC100422212 | 4.74E-01 | 4.15E-01 | 2.74 | 8.11 | 1.92E-02 |
| THOC7        | 4.74E-01 | 4.15E-01 | 2.74 | 8.10 | 1.92E-02 |
| TNNC2        | 4.74E-01 | 4.15E-01 | 2.74 | 8.10 | 1.92E-02 |
| IFIT1B       | 4.74E-01 | 4.15E-01 | 2.74 | 8.10 | 1.92E-02 |
| SHISA5       | 4.73E-01 | 4.15E-01 | 2.74 | 8.09 | 1.93E-02 |
| LHX1_1       | 4.73E-01 | 4.15E-01 | 2.74 | 8.09 | 1.93E-02 |
| ZSCAN16.AS1  | 4.73E-01 | 4.15E-01 | 2.75 | 8.08 | 1.93E-02 |
| PITPNA       | 4.73E-01 | 4.14E-01 | 2.75 | 8.07 | 1.94E-02 |
| LOC107984019 | 4.73E-01 | 4.14E-01 | 2.75 | 8.07 | 1.94E-02 |
| H3P6         | 4.72E-01 | 4.14E-01 | 2.75 | 8.05 | 1.95E-02 |
| LOC112267959 | 4.72E-01 | 4.14E-01 | 2.75 | 8.05 | 1.95E-02 |
| SIX2         | 4.72E-01 | 4.14E-01 | 2.75 | 8.05 | 1.95E-02 |
| LINC01919    | 4.72E-01 | 4.13E-01 | 2.75 | 8.05 | 1.95E-02 |
| TGFB3        | 4.72E-01 | 4.13E-01 | 2.75 | 8.04 | 1.96E-02 |
| OR2L8        | 4.72E-01 | 4.13E-01 | 2.75 | 8.04 | 1.96E-02 |
| LOC107987078 | 4.72E-01 | 4.13E-01 | 2.75 | 8.04 | 1.96E-02 |
| LEFTY1       | 4.72E-01 | 4.13E-01 | 2.75 | 8.03 | 1.96E-02 |
| H2BP1        | 4.72E-01 | 4.13E-01 | 2.75 | 8.03 | 1.96E-02 |
| LOC107985694 | 4.71E-01 | 4.13E-01 | 2.75 | 8.03 | 1.96E-02 |
| IDI2.AS1     | 4.71E-01 | 4.12E-01 | 2.75 | 8.02 | 1.97E-02 |
| DPH3P1       | 4.71E-01 | 4.12E-01 | 2.75 | 8.01 | 1.97E-02 |
| FAM197Y7     | 4.71E-01 | 4.12E-01 | 2.75 | 8.00 | 1.98E-02 |
| BCO1         | 4.70E-01 | 4.12E-01 | 2.75 | 8.00 | 1.98E-02 |
| LOC105377166 | 4.70E-01 | 4.12E-01 | 2.75 | 7.99 | 1.98E-02 |
| GALNT4       | 4.70E-01 | 4.11E-01 | 2.75 | 7.99 | 1.98E-02 |
| DRD4_1       | 4.70E-01 | 4.11E-01 | 2.75 | 7.99 | 1.98E-02 |

|              |          |          |      |      |          |
|--------------|----------|----------|------|------|----------|
| ATOH1        | 4.70E-01 | 4.11E-01 | 2.75 | 7.98 | 1.99E-02 |
| ENTPD1       | 4.70E-01 | 4.11E-01 | 2.75 | 7.97 | 1.99E-02 |
| LINC01849    | 4.70E-01 | 4.11E-01 | 2.75 | 7.97 | 1.99E-02 |
| LOC101059954 | 4.70E-01 | 4.11E-01 | 2.75 | 7.97 | 2.00E-02 |
| LINC01586    | 4.70E-01 | 4.11E-01 | 2.75 | 7.97 | 2.00E-02 |
| LOC105369647 | 4.69E-01 | 4.10E-01 | 2.76 | 7.96 | 2.00E-02 |
| ST7.OT4      | 4.69E-01 | 4.10E-01 | 2.76 | 7.95 | 2.00E-02 |
| LRIF1        | 4.69E-01 | 4.10E-01 | 2.76 | 7.94 | 2.01E-02 |
| HULC         | 4.69E-01 | 4.09E-01 | 2.76 | 7.93 | 2.02E-02 |
| LOC105369329 | 4.67E-01 | 4.07E-01 | 2.76 | 7.87 | 2.05E-02 |
| ETV7         | 4.66E-01 | 4.07E-01 | 2.76 | 7.87 | 2.06E-02 |
| LOC105374797 | 4.66E-01 | 4.07E-01 | 2.76 | 7.86 | 2.06E-02 |
| LOC105371116 | 4.66E-01 | 4.07E-01 | 2.76 | 7.86 | 2.06E-02 |
| LINC02772    | 4.66E-01 | 4.07E-01 | 2.76 | 7.86 | 2.06E-02 |
| LOC105371024 | 4.66E-01 | 4.07E-01 | 2.76 | 7.85 | 2.07E-02 |
| NINJ2.AS1    | 4.66E-01 | 4.06E-01 | 2.76 | 7.85 | 2.07E-02 |
| LOC107984381 | 4.65E-01 | 4.06E-01 | 2.77 | 7.83 | 2.08E-02 |
| LINC02082    | 4.65E-01 | 4.06E-01 | 2.77 | 7.82 | 2.08E-02 |
| DLX4         | 4.65E-01 | 4.05E-01 | 2.77 | 7.82 | 2.08E-02 |
| APTR         | 4.64E-01 | 4.05E-01 | 2.77 | 7.80 | 2.09E-02 |
| SNRPD2P2     | 4.64E-01 | 4.04E-01 | 2.77 | 7.79 | 2.10E-02 |
| WIPI1        | 4.64E-01 | 4.04E-01 | 2.77 | 7.79 | 2.10E-02 |
| LOC105371878 | 4.63E-01 | 4.04E-01 | 2.77 | 7.77 | 2.11E-02 |
| LINC00548    | 4.63E-01 | 4.04E-01 | 2.77 | 7.77 | 2.11E-02 |
| VSNL1        | 4.63E-01 | 4.04E-01 | 2.77 | 7.76 | 2.12E-02 |
| CD3D         | 4.63E-01 | 4.03E-01 | 2.77 | 7.75 | 2.12E-02 |
| LOC105375050 | 4.62E-01 | 4.03E-01 | 2.77 | 7.74 | 2.13E-02 |
| PANO1        | 4.62E-01 | 4.02E-01 | 2.77 | 7.74 | 2.14E-02 |
| C15orf39     | 4.62E-01 | 4.02E-01 | 2.77 | 7.73 | 2.14E-02 |
| LOC105378515 | 4.62E-01 | 4.02E-01 | 2.77 | 7.73 | 2.14E-02 |
| NKRF         | 4.62E-01 | 4.02E-01 | 2.77 | 7.73 | 2.14E-02 |
| AMH          | 4.61E-01 | 4.01E-01 | 2.78 | 7.69 | 2.16E-02 |
| GASK1A       | 4.60E-01 | 4.01E-01 | 2.78 | 7.68 | 2.17E-02 |
| LOC102546229 | 4.60E-01 | 4.00E-01 | 2.78 | 7.68 | 2.17E-02 |
| MTFR1L       | 4.60E-01 | 4.00E-01 | 2.78 | 7.67 | 2.18E-02 |
| KIRREL1      | 4.60E-01 | 4.00E-01 | 2.78 | 7.66 | 2.18E-02 |
| LOC105369202 | 4.60E-01 | 4.00E-01 | 2.78 | 7.66 | 2.18E-02 |
| MIR8070      | 4.59E-01 | 3.99E-01 | 2.78 | 7.65 | 2.19E-02 |
| GUCA1B       | 4.59E-01 | 3.99E-01 | 2.78 | 7.65 | 2.19E-02 |
| LOC105377499 | 4.59E-01 | 3.99E-01 | 2.78 | 7.64 | 2.20E-02 |
| LINC01419    | 4.59E-01 | 3.99E-01 | 2.78 | 7.63 | 2.21E-02 |



|              |          |          |      |      |          |
|--------------|----------|----------|------|------|----------|
| LOC107985158 | 4.59E-01 | 3.99E-01 | 2.78 | 7.63 | 2.21E-02 |
| LINC01657    | 4.58E-01 | 3.98E-01 | 2.78 | 7.62 | 2.21E-02 |
| MRPL12       | 4.58E-01 | 3.98E-01 | 2.78 | 7.62 | 2.21E-02 |
| INHBA        | 4.58E-01 | 3.98E-01 | 2.78 | 7.62 | 2.21E-02 |
| DAAM2.AS1    | 4.58E-01 | 3.98E-01 | 2.78 | 7.61 | 2.22E-02 |
| HSPA1L_3     | 4.58E-01 | 3.98E-01 | 2.78 | 7.61 | 2.22E-02 |
| KIR2DL1_4    | 4.58E-01 | 3.98E-01 | 2.78 | 7.61 | 2.22E-02 |
| LOC112267881 | 4.58E-01 | 3.98E-01 | 2.78 | 7.61 | 2.22E-02 |
| GNAI3        | 4.58E-01 | 3.98E-01 | 2.79 | 7.60 | 2.22E-02 |
| ZNF189       | 4.58E-01 | 3.97E-01 | 2.79 | 7.60 | 2.23E-02 |
| IGIP         | 4.58E-01 | 3.97E-01 | 2.79 | 7.60 | 2.23E-02 |
| HSPE1        | 4.58E-01 | 3.97E-01 | 2.79 | 7.59 | 2.23E-02 |
| TOP1P1       | 4.58E-01 | 3.97E-01 | 2.79 | 7.59 | 2.23E-02 |
| TP53BP1      | 4.57E-01 | 3.97E-01 | 2.79 | 7.58 | 2.23E-02 |
| PENK         | 4.57E-01 | 3.97E-01 | 2.79 | 7.58 | 2.24E-02 |
| TMEM9        | 4.57E-01 | 3.97E-01 | 2.79 | 7.57 | 2.24E-02 |
| LOC100129455 | 4.57E-01 | 3.97E-01 | 2.79 | 7.57 | 2.24E-02 |
| GPR135       | 4.57E-01 | 3.96E-01 | 2.79 | 7.57 | 2.24E-02 |
| LOC105372928 | 4.57E-01 | 3.96E-01 | 2.79 | 7.57 | 2.25E-02 |
| LOC101928386 | 4.56E-01 | 3.96E-01 | 2.79 | 7.55 | 2.25E-02 |
| DEDD         | 4.56E-01 | 3.96E-01 | 2.79 | 7.55 | 2.26E-02 |
| NELFB        | 4.56E-01 | 3.96E-01 | 2.79 | 7.55 | 2.26E-02 |
| EIF1         | 4.56E-01 | 3.95E-01 | 2.79 | 7.54 | 2.26E-02 |
| LOC105374804 | 4.55E-01 | 3.95E-01 | 2.79 | 7.53 | 2.27E-02 |
| ATR          | 4.55E-01 | 3.95E-01 | 2.79 | 7.53 | 2.27E-02 |
| NOTCH4_2     | 4.55E-01 | 3.94E-01 | 2.79 | 7.51 | 2.28E-02 |
| LOC105378476 | 4.55E-01 | 3.94E-01 | 2.79 | 7.51 | 2.29E-02 |
| LINC01290    | 4.54E-01 | 3.94E-01 | 2.79 | 7.50 | 2.29E-02 |
| OR4C3        | 4.54E-01 | 3.94E-01 | 2.79 | 7.49 | 2.29E-02 |
| LINC01761    | 4.54E-01 | 3.93E-01 | 2.79 | 7.49 | 2.30E-02 |
| LOC105379123 | 4.54E-01 | 3.93E-01 | 2.80 | 7.48 | 2.31E-02 |
| NSUN4        | 4.54E-01 | 3.93E-01 | 2.80 | 7.48 | 2.31E-02 |
| TNFSF12      | 4.54E-01 | 3.93E-01 | 2.80 | 7.47 | 2.31E-02 |
| LINC01872    | 4.53E-01 | 3.93E-01 | 2.80 | 7.47 | 2.31E-02 |
| LOC105377461 | 4.53E-01 | 3.93E-01 | 2.80 | 7.46 | 2.32E-02 |
| LOC100129503 | 4.53E-01 | 3.93E-01 | 2.80 | 7.46 | 2.32E-02 |
| LOC105378688 | 4.53E-01 | 3.92E-01 | 2.80 | 7.45 | 2.32E-02 |
| ZNF460.AS1   | 4.53E-01 | 3.92E-01 | 2.80 | 7.45 | 2.33E-02 |
| RBMV2EP      | 4.53E-01 | 3.92E-01 | 2.80 | 7.45 | 2.33E-02 |
| LINC02408    | 4.53E-01 | 3.92E-01 | 2.80 | 7.45 | 2.33E-02 |
| LOC107986359 | 4.53E-01 | 3.92E-01 | 2.80 | 7.44 | 2.33E-02 |

|              |          |          |      |      |          |
|--------------|----------|----------|------|------|----------|
| SNRPN        | 4.53E-01 | 3.92E-01 | 2.80 | 7.44 | 2.33E-02 |
| LOC107987061 | 4.52E-01 | 3.92E-01 | 2.80 | 7.43 | 2.34E-02 |
| ANKRD54      | 4.52E-01 | 3.91E-01 | 2.80 | 7.43 | 2.34E-02 |
| MARS2        | 4.52E-01 | 3.91E-01 | 2.80 | 7.42 | 2.35E-02 |
| TRPM7        | 4.51E-01 | 3.91E-01 | 2.80 | 7.41 | 2.35E-02 |
| LOC105375716 | 4.51E-01 | 3.90E-01 | 2.80 | 7.40 | 2.36E-02 |
| LOC107986887 | 4.51E-01 | 3.90E-01 | 2.80 | 7.40 | 2.36E-02 |
| SLC18A3      | 4.51E-01 | 3.90E-01 | 2.80 | 7.40 | 2.36E-02 |
| RASL11B      | 4.51E-01 | 3.90E-01 | 2.80 | 7.39 | 2.37E-02 |
| CD300LD      | 4.51E-01 | 3.90E-01 | 2.80 | 7.39 | 2.37E-02 |
| IGKV2D.29    | 4.51E-01 | 3.90E-01 | 2.80 | 7.39 | 2.37E-02 |
| JUND         | 4.50E-01 | 3.89E-01 | 2.80 | 7.37 | 2.38E-02 |
| SNORD13H     | 4.50E-01 | 3.89E-01 | 2.80 | 7.37 | 2.38E-02 |
| MRPS36       | 4.50E-01 | 3.89E-01 | 2.80 | 7.37 | 2.38E-02 |
| LOC101927890 | 4.50E-01 | 3.89E-01 | 2.80 | 7.37 | 2.38E-02 |
| NBPF22P      | 4.50E-01 | 3.89E-01 | 2.81 | 7.36 | 2.39E-02 |
| LOC105372511 | 4.50E-01 | 3.89E-01 | 2.81 | 7.36 | 2.39E-02 |
| LOC105376345 | 4.50E-01 | 3.89E-01 | 2.81 | 7.36 | 2.39E-02 |
| PIWIL2       | 4.50E-01 | 3.89E-01 | 2.81 | 7.36 | 2.39E-02 |
| LOC107986897 | 4.50E-01 | 3.89E-01 | 2.81 | 7.36 | 2.39E-02 |
| LOC105370964 | 4.49E-01 | 3.88E-01 | 2.81 | 7.35 | 2.40E-02 |
| ERICH6B      | 4.49E-01 | 3.88E-01 | 2.81 | 7.34 | 2.41E-02 |
| CTDSP2       | 4.49E-01 | 3.88E-01 | 2.81 | 7.33 | 2.41E-02 |
| LOC101928168 | 4.49E-01 | 3.88E-01 | 2.81 | 7.33 | 2.41E-02 |
| IGKV3D.11    | 4.48E-01 | 3.87E-01 | 2.81 | 7.31 | 2.42E-02 |
| LOC107986962 | 4.48E-01 | 3.87E-01 | 2.81 | 7.31 | 2.43E-02 |
| LILRA2       | 4.48E-01 | 3.87E-01 | 2.81 | 7.31 | 2.43E-02 |
| SNORD126     | 4.48E-01 | 3.87E-01 | 2.81 | 7.31 | 2.43E-02 |
| LOC105375875 | 4.48E-01 | 3.86E-01 | 2.81 | 7.30 | 2.43E-02 |
| HS6ST2.AS1   | 4.48E-01 | 3.86E-01 | 2.81 | 7.29 | 2.44E-02 |
| LOC105377235 | 4.48E-01 | 3.86E-01 | 2.81 | 7.29 | 2.44E-02 |
| HBD          | 4.47E-01 | 3.86E-01 | 2.81 | 7.28 | 2.45E-02 |
| IFNL2        | 4.47E-01 | 3.85E-01 | 2.81 | 7.27 | 2.45E-02 |
| LOC105378323 | 4.46E-01 | 3.85E-01 | 2.81 | 7.26 | 2.46E-02 |
| TCTA         | 4.46E-01 | 3.85E-01 | 2.81 | 7.25 | 2.47E-02 |
| LRRC52.AS1   | 4.46E-01 | 3.85E-01 | 2.82 | 7.25 | 2.47E-02 |
| RPS28        | 4.46E-01 | 3.84E-01 | 2.82 | 7.25 | 2.47E-02 |
| LOC105374721 | 4.46E-01 | 3.84E-01 | 2.82 | 7.25 | 2.47E-02 |
| LSM10        | 4.46E-01 | 3.84E-01 | 2.82 | 7.24 | 2.48E-02 |
| RAB44        | 4.45E-01 | 3.84E-01 | 2.82 | 7.23 | 2.48E-02 |
| MTMR3        | 4.45E-01 | 3.84E-01 | 2.82 | 7.23 | 2.49E-02 |

|              |          |          |      |      |          |
|--------------|----------|----------|------|------|----------|
| WASH3P_1     | 4.45E-01 | 3.84E-01 | 2.82 | 7.23 | 2.49E-02 |
| CEP192       | 4.45E-01 | 3.83E-01 | 2.82 | 7.22 | 2.49E-02 |
| MGC16275     | 4.45E-01 | 3.83E-01 | 2.82 | 7.21 | 2.50E-02 |
| OCEL1        | 4.45E-01 | 3.83E-01 | 2.82 | 7.21 | 2.50E-02 |
| PLP2         | 4.45E-01 | 3.83E-01 | 2.82 | 7.21 | 2.50E-02 |
| LOC105376237 | 4.44E-01 | 3.83E-01 | 2.82 | 7.20 | 2.51E-02 |
| LINC01916    | 4.44E-01 | 3.82E-01 | 2.82 | 7.19 | 2.51E-02 |
| LOC644669    | 4.44E-01 | 3.82E-01 | 2.82 | 7.18 | 2.52E-02 |
| TNKS2.AS1    | 4.44E-01 | 3.82E-01 | 2.82 | 7.18 | 2.52E-02 |
| LOC107984670 | 4.44E-01 | 3.82E-01 | 2.82 | 7.18 | 2.52E-02 |
| LOC100288123 | 4.44E-01 | 3.82E-01 | 2.82 | 7.18 | 2.53E-02 |
| BPIFB2       | 4.44E-01 | 3.82E-01 | 2.82 | 7.17 | 2.53E-02 |
| TOMM40L      | 4.44E-01 | 3.82E-01 | 2.82 | 7.17 | 2.53E-02 |
| REPIN1       | 4.43E-01 | 3.82E-01 | 2.82 | 7.17 | 2.53E-02 |
| GATA6.AS1    | 4.43E-01 | 3.81E-01 | 2.82 | 7.16 | 2.53E-02 |
| NUDT9P1      | 4.43E-01 | 3.81E-01 | 2.82 | 7.16 | 2.54E-02 |
| LOC100506446 | 4.43E-01 | 3.81E-01 | 2.82 | 7.16 | 2.54E-02 |
| RPS16P5      | 4.43E-01 | 3.81E-01 | 2.82 | 7.15 | 2.54E-02 |
| GAGE13       | 4.43E-01 | 3.81E-01 | 2.82 | 7.15 | 2.55E-02 |
| ANKRD6       | 4.43E-01 | 3.81E-01 | 2.82 | 7.15 | 2.55E-02 |
| LINC01350    | 4.42E-01 | 3.80E-01 | 2.82 | 7.14 | 2.56E-02 |
| HERC2P2_2    | 4.42E-01 | 3.80E-01 | 2.83 | 7.13 | 2.56E-02 |
| LOC107986959 | 4.42E-01 | 3.80E-01 | 2.83 | 7.13 | 2.56E-02 |
| SNORA70B     | 4.42E-01 | 3.80E-01 | 2.83 | 7.13 | 2.56E-02 |
| CSKMT        | 4.42E-01 | 3.80E-01 | 2.83 | 7.12 | 2.57E-02 |
| TONSL.AS1    | 4.42E-01 | 3.80E-01 | 2.83 | 7.12 | 2.57E-02 |
| LOC105378457 | 4.42E-01 | 3.79E-01 | 2.83 | 7.11 | 2.57E-02 |
| IL20RA       | 4.41E-01 | 3.79E-01 | 2.83 | 7.11 | 2.58E-02 |
| RLN2         | 4.41E-01 | 3.79E-01 | 2.83 | 7.10 | 2.58E-02 |
| WNT2         | 4.41E-01 | 3.79E-01 | 2.83 | 7.10 | 2.59E-02 |
| CASQ1        | 4.41E-01 | 3.79E-01 | 2.83 | 7.10 | 2.59E-02 |
| COL26A1      | 4.41E-01 | 3.79E-01 | 2.83 | 7.09 | 2.59E-02 |
| ZDHHC23      | 4.40E-01 | 3.78E-01 | 2.83 | 7.08 | 2.60E-02 |
| LOC105369851 | 4.40E-01 | 3.78E-01 | 2.83 | 7.07 | 2.61E-02 |
| LOC101927213 | 4.40E-01 | 3.78E-01 | 2.83 | 7.07 | 2.61E-02 |
| TRQ.CTG1.4   | 4.40E-01 | 3.77E-01 | 2.83 | 7.06 | 2.61E-02 |
| POLR2K       | 4.40E-01 | 3.77E-01 | 2.83 | 7.06 | 2.62E-02 |
| FAM216B      | 4.40E-01 | 3.77E-01 | 2.83 | 7.06 | 2.62E-02 |
| LOC102723339 | 4.40E-01 | 3.77E-01 | 2.83 | 7.06 | 2.62E-02 |
| HSD52        | 4.40E-01 | 3.77E-01 | 2.83 | 7.06 | 2.62E-02 |
| LOC107986597 | 4.39E-01 | 3.77E-01 | 2.83 | 7.06 | 2.62E-02 |

|              |          |          |      |      |          |
|--------------|----------|----------|------|------|----------|
| LOC105376197 | 4.39E-01 | 3.77E-01 | 2.83 | 7.05 | 2.62E-02 |
| LOC112268042 | 4.39E-01 | 3.77E-01 | 2.83 | 7.05 | 2.62E-02 |
| LINC01490    | 4.39E-01 | 3.77E-01 | 2.83 | 7.05 | 2.63E-02 |
| LOC101929341 | 4.39E-01 | 3.77E-01 | 2.83 | 7.04 | 2.63E-02 |
| TRG.AS1      | 4.39E-01 | 3.77E-01 | 2.83 | 7.04 | 2.63E-02 |
| GET1         | 4.39E-01 | 3.77E-01 | 2.83 | 7.04 | 2.63E-02 |
| YWHAEP7      | 4.39E-01 | 3.77E-01 | 2.83 | 7.04 | 2.63E-02 |
| SDK1.AS1     | 4.39E-01 | 3.76E-01 | 2.83 | 7.04 | 2.63E-02 |
| TMPRSS11F    | 4.39E-01 | 3.76E-01 | 2.83 | 7.03 | 2.64E-02 |
| KLHDC7B.DT   | 4.39E-01 | 3.76E-01 | 2.83 | 7.03 | 2.64E-02 |
| MIR4435.2HG  | 4.38E-01 | 3.76E-01 | 2.83 | 7.02 | 2.65E-02 |
| LINC02626    | 4.38E-01 | 3.76E-01 | 2.84 | 7.02 | 2.65E-02 |
| LOC105377879 | 4.38E-01 | 3.76E-01 | 2.84 | 7.02 | 2.65E-02 |
| FOXN3.AS1    | 4.38E-01 | 3.76E-01 | 2.84 | 7.02 | 2.65E-02 |
| LOC100132686 | 4.38E-01 | 3.76E-01 | 2.84 | 7.02 | 2.65E-02 |
| MS4A18       | 4.38E-01 | 3.76E-01 | 2.84 | 7.02 | 2.65E-02 |
| GTF3C2.AS1   | 4.38E-01 | 3.76E-01 | 2.84 | 7.02 | 2.65E-02 |
| GAGE12B      | 4.38E-01 | 3.76E-01 | 2.84 | 7.02 | 2.65E-02 |
| TBC1D3E      | 4.38E-01 | 3.75E-01 | 2.84 | 7.01 | 2.66E-02 |
| LOC105374172 | 4.38E-01 | 3.75E-01 | 2.84 | 7.01 | 2.66E-02 |
| OR4P4        | 4.38E-01 | 3.75E-01 | 2.84 | 7.00 | 2.67E-02 |
| C8orf48      | 4.38E-01 | 3.75E-01 | 2.84 | 7.00 | 2.67E-02 |
| LOC101927979 | 4.37E-01 | 3.75E-01 | 2.84 | 7.00 | 2.67E-02 |
| LOC107986921 | 4.37E-01 | 3.75E-01 | 2.84 | 6.99 | 2.67E-02 |
| MRPS31P5     | 4.37E-01 | 3.74E-01 | 2.84 | 6.99 | 2.68E-02 |
| LGALS13      | 4.37E-01 | 3.74E-01 | 2.84 | 6.99 | 2.68E-02 |
| LOC107987116 | 4.37E-01 | 3.74E-01 | 2.84 | 6.99 | 2.68E-02 |
| TSPEAR.AS1   | 4.37E-01 | 3.74E-01 | 2.84 | 6.98 | 2.69E-02 |
| LOC105370080 | 4.37E-01 | 3.74E-01 | 2.84 | 6.98 | 2.69E-02 |
| TAGAP        | 4.37E-01 | 3.74E-01 | 2.84 | 6.98 | 2.69E-02 |
| PIAS3        | 4.37E-01 | 3.74E-01 | 2.84 | 6.97 | 2.69E-02 |
| LOC108783654 | 4.36E-01 | 3.74E-01 | 2.84 | 6.97 | 2.69E-02 |
| TRAC         | 4.36E-01 | 3.74E-01 | 2.84 | 6.96 | 2.70E-02 |
| SDC4         | 4.36E-01 | 3.73E-01 | 2.84 | 6.95 | 2.71E-02 |
| IGLV3.29     | 4.36E-01 | 3.73E-01 | 2.84 | 6.95 | 2.71E-02 |
| TRBV7.6_1    | 4.36E-01 | 3.73E-01 | 2.84 | 6.95 | 2.71E-02 |
| CNTFR.AS1    | 4.35E-01 | 3.73E-01 | 2.84 | 6.94 | 2.72E-02 |
| LOC101929551 | 4.35E-01 | 3.73E-01 | 2.84 | 6.94 | 2.72E-02 |
| ADGRE4P      | 4.35E-01 | 3.72E-01 | 2.84 | 6.92 | 2.73E-02 |
| LOC105378327 | 4.34E-01 | 3.72E-01 | 2.84 | 6.91 | 2.74E-02 |
| RPL24        | 4.34E-01 | 3.72E-01 | 2.84 | 6.91 | 2.74E-02 |

|              |          |          |      |      |          |
|--------------|----------|----------|------|------|----------|
| LOC105371901 | 4.34E-01 | 3.71E-01 | 2.84 | 6.91 | 2.74E-02 |
| COL28A1      | 4.34E-01 | 3.71E-01 | 2.85 | 6.90 | 2.75E-02 |
| GPR176       | 4.34E-01 | 3.71E-01 | 2.85 | 6.90 | 2.75E-02 |
| TM2D1        | 4.34E-01 | 3.71E-01 | 2.85 | 6.89 | 2.76E-02 |
| LOC105377055 | 4.34E-01 | 3.71E-01 | 2.85 | 6.89 | 2.76E-02 |
| LOC100506016 | 4.33E-01 | 3.71E-01 | 2.85 | 6.89 | 2.76E-02 |
| LOC105377437 | 4.33E-01 | 3.70E-01 | 2.85 | 6.88 | 2.77E-02 |
| LOC105379329 | 4.33E-01 | 3.70E-01 | 2.85 | 6.88 | 2.77E-02 |
| LINC02206    | 4.33E-01 | 3.70E-01 | 2.85 | 6.88 | 2.77E-02 |
| LOC105369960 | 4.33E-01 | 3.70E-01 | 2.85 | 6.88 | 2.77E-02 |
| LOC105370873 | 4.33E-01 | 3.70E-01 | 2.85 | 6.87 | 2.77E-02 |
| CARD9        | 4.33E-01 | 3.70E-01 | 2.85 | 6.87 | 2.78E-02 |
| PDGFRL       | 4.32E-01 | 3.69E-01 | 2.85 | 6.85 | 2.79E-02 |
| OR1D5        | 4.32E-01 | 3.69E-01 | 2.85 | 6.85 | 2.80E-02 |
| MIR548F2     | 4.32E-01 | 3.68E-01 | 2.85 | 6.83 | 2.81E-02 |
| CYB561D2     | 4.31E-01 | 3.68E-01 | 2.85 | 6.83 | 2.81E-02 |
| CRYGS        | 4.31E-01 | 3.68E-01 | 2.85 | 6.83 | 2.81E-02 |
| WDR13        | 4.31E-01 | 3.68E-01 | 2.85 | 6.83 | 2.81E-02 |
| LOC107984770 | 4.31E-01 | 3.68E-01 | 2.85 | 6.82 | 2.82E-02 |
| LOC107984369 | 4.31E-01 | 3.68E-01 | 2.85 | 6.82 | 2.82E-02 |
| LOC105377762 | 4.31E-01 | 3.68E-01 | 2.85 | 6.82 | 2.82E-02 |
| LOC105370350 | 4.31E-01 | 3.68E-01 | 2.85 | 6.82 | 2.82E-02 |
| LOC107984650 | 4.31E-01 | 3.68E-01 | 2.85 | 6.81 | 2.83E-02 |
| MIR181A1     | 4.31E-01 | 3.68E-01 | 2.85 | 6.81 | 2.83E-02 |
| CXCL10       | 4.31E-01 | 3.67E-01 | 2.85 | 6.81 | 2.83E-02 |
| BARX1.DT     | 4.31E-01 | 3.67E-01 | 2.85 | 6.81 | 2.83E-02 |
| KATNBL1P6    | 4.31E-01 | 3.67E-01 | 2.85 | 6.81 | 2.83E-02 |
| LINC02521    | 4.31E-01 | 3.67E-01 | 2.85 | 6.81 | 2.83E-02 |
| BRPF1        | 4.30E-01 | 3.67E-01 | 2.86 | 6.79 | 2.85E-02 |
| RFX2         | 4.30E-01 | 3.66E-01 | 2.86 | 6.78 | 2.85E-02 |
| LINC01358    | 4.30E-01 | 3.66E-01 | 2.86 | 6.78 | 2.85E-02 |
| LINC00635    | 4.30E-01 | 3.66E-01 | 2.86 | 6.78 | 2.85E-02 |
| LOC105369658 | 4.30E-01 | 3.66E-01 | 2.86 | 6.78 | 2.86E-02 |
| IGHA2        | 4.29E-01 | 3.66E-01 | 2.86 | 6.78 | 2.86E-02 |
| SNORD65C     | 4.29E-01 | 3.66E-01 | 2.86 | 6.77 | 2.86E-02 |
| LOC105376302 | 4.29E-01 | 3.66E-01 | 2.86 | 6.77 | 2.86E-02 |
| LZTFL1       | 4.29E-01 | 3.66E-01 | 2.86 | 6.77 | 2.86E-02 |
| CCT6P1       | 4.29E-01 | 3.66E-01 | 2.86 | 6.77 | 2.86E-02 |
| TSPAN33      | 4.29E-01 | 3.66E-01 | 2.86 | 6.77 | 2.87E-02 |
| GOLGA2P10    | 4.29E-01 | 3.66E-01 | 2.86 | 6.77 | 2.87E-02 |
| ART1         | 4.29E-01 | 3.66E-01 | 2.86 | 6.76 | 2.87E-02 |

|              |          |          |      |      |          |
|--------------|----------|----------|------|------|----------|
| LOC105378098 | 4.29E-01 | 3.65E-01 | 2.86 | 6.76 | 2.87E-02 |
| RPS9         | 4.29E-01 | 3.65E-01 | 2.86 | 6.76 | 2.88E-02 |
| RABL2B       | 4.29E-01 | 3.65E-01 | 2.86 | 6.75 | 2.88E-02 |
| DPPA2P3      | 4.29E-01 | 3.65E-01 | 2.86 | 6.75 | 2.88E-02 |
| MIR6130      | 4.29E-01 | 3.65E-01 | 2.86 | 6.75 | 2.88E-02 |
| LOC107985279 | 4.29E-01 | 3.65E-01 | 2.86 | 6.75 | 2.88E-02 |
| AZGP1P1      | 4.28E-01 | 3.65E-01 | 2.86 | 6.75 | 2.89E-02 |
| PYGO2        | 4.28E-01 | 3.65E-01 | 2.86 | 6.74 | 2.89E-02 |
| LOC112268214 | 4.28E-01 | 3.64E-01 | 2.86 | 6.73 | 2.90E-02 |
| LOC107985551 | 4.28E-01 | 3.64E-01 | 2.86 | 6.72 | 2.91E-02 |
| CCDC140      | 4.27E-01 | 3.64E-01 | 2.86 | 6.72 | 2.91E-02 |
| GPD2         | 4.27E-01 | 3.64E-01 | 2.86 | 6.72 | 2.91E-02 |
| LOC285422    | 4.27E-01 | 3.64E-01 | 2.86 | 6.71 | 2.92E-02 |
| LOC285804    | 4.27E-01 | 3.63E-01 | 2.86 | 6.71 | 2.92E-02 |
| LOC105379149 | 4.27E-01 | 3.63E-01 | 2.86 | 6.71 | 2.92E-02 |
| LOC105375462 | 4.27E-01 | 3.63E-01 | 2.86 | 6.71 | 2.92E-02 |
| KRTAP19.5    | 4.27E-01 | 3.63E-01 | 2.86 | 6.70 | 2.93E-02 |
| LOC105370982 | 4.26E-01 | 3.62E-01 | 2.87 | 6.69 | 2.94E-02 |
| LOC105372117 | 4.26E-01 | 3.62E-01 | 2.87 | 6.68 | 2.95E-02 |
| LOC105371818 | 4.26E-01 | 3.62E-01 | 2.87 | 6.68 | 2.95E-02 |
| EID1         | 4.26E-01 | 3.62E-01 | 2.87 | 6.67 | 2.95E-02 |
| EXOSC7       | 4.26E-01 | 3.62E-01 | 2.87 | 6.67 | 2.96E-02 |
| LOC107984358 | 4.25E-01 | 3.62E-01 | 2.87 | 6.66 | 2.96E-02 |
| LOC101930071 | 4.25E-01 | 3.61E-01 | 2.87 | 6.66 | 2.97E-02 |
| GTPBP3       | 4.25E-01 | 3.61E-01 | 2.87 | 6.65 | 2.97E-02 |
| TRAV12.1     | 4.25E-01 | 3.61E-01 | 2.87 | 6.64 | 2.98E-02 |
| LINC00244    | 4.24E-01 | 3.60E-01 | 2.87 | 6.64 | 2.99E-02 |
| LOC105374986 | 4.24E-01 | 3.60E-01 | 2.87 | 6.63 | 2.99E-02 |
| CDYL.AS1     | 4.24E-01 | 3.60E-01 | 2.87 | 6.63 | 3.00E-02 |
| RIOK1        | 4.24E-01 | 3.60E-01 | 2.87 | 6.63 | 3.00E-02 |
| PRPSAP2      | 4.24E-01 | 3.60E-01 | 2.87 | 6.63 | 3.00E-02 |
| UBE2NL       | 4.24E-01 | 3.60E-01 | 2.87 | 6.62 | 3.00E-02 |
| ACACA_1      | 4.24E-01 | 3.60E-01 | 2.87 | 6.62 | 3.00E-02 |
| LOC105379194 | 4.24E-01 | 3.60E-01 | 2.87 | 6.62 | 3.01E-02 |
| SCARF2       | 4.24E-01 | 3.60E-01 | 2.87 | 6.62 | 3.01E-02 |
| NOA1         | 4.24E-01 | 3.59E-01 | 2.87 | 6.61 | 3.01E-02 |
| DVL1         | 4.23E-01 | 3.59E-01 | 2.87 | 6.61 | 3.02E-02 |
| CBX8         | 4.23E-01 | 3.59E-01 | 2.87 | 6.60 | 3.02E-02 |
| LOC107986920 | 4.23E-01 | 3.59E-01 | 2.87 | 6.60 | 3.02E-02 |
| LOC105377932 | 4.23E-01 | 3.59E-01 | 2.87 | 6.60 | 3.02E-02 |
| LOC105376586 | 4.23E-01 | 3.59E-01 | 2.87 | 6.60 | 3.02E-02 |

|              |          |          |      |      |          |
|--------------|----------|----------|------|------|----------|
| FBXO48       | 4.22E-01 | 3.58E-01 | 2.87 | 6.58 | 3.04E-02 |
| LOC107984169 | 4.22E-01 | 3.58E-01 | 2.88 | 6.57 | 3.05E-02 |
| RFC5         | 4.22E-01 | 3.57E-01 | 2.88 | 6.56 | 3.06E-02 |
| LOC105369318 | 4.22E-01 | 3.57E-01 | 2.88 | 6.56 | 3.06E-02 |
| MYOSLID.AS1  | 4.21E-01 | 3.57E-01 | 2.88 | 6.55 | 3.07E-02 |
| RP9P         | 4.21E-01 | 3.57E-01 | 2.88 | 6.55 | 3.07E-02 |
| IGLVI.70     | 4.21E-01 | 3.57E-01 | 2.88 | 6.54 | 3.08E-02 |
| PKMYT1       | 4.21E-01 | 3.56E-01 | 2.88 | 6.54 | 3.08E-02 |
| FCGBP        | 4.21E-01 | 3.56E-01 | 2.88 | 6.54 | 3.08E-02 |
| LOC400710    | 4.21E-01 | 3.56E-01 | 2.88 | 6.53 | 3.09E-02 |
| TBXT         | 4.20E-01 | 3.56E-01 | 2.88 | 6.53 | 3.09E-02 |
| UBTD1        | 4.20E-01 | 3.56E-01 | 2.88 | 6.52 | 3.10E-02 |
| LOC105374798 | 4.20E-01 | 3.55E-01 | 2.88 | 6.51 | 3.11E-02 |
| PEX11G       | 4.20E-01 | 3.55E-01 | 2.88 | 6.51 | 3.12E-02 |
| LOC105370674 | 4.19E-01 | 3.55E-01 | 2.88 | 6.50 | 3.12E-02 |
| LOC105376035 | 4.19E-01 | 3.55E-01 | 2.88 | 6.50 | 3.12E-02 |
| DHX37        | 4.19E-01 | 3.55E-01 | 2.88 | 6.50 | 3.13E-02 |
| UGT1A3       | 4.19E-01 | 3.54E-01 | 2.88 | 6.49 | 3.13E-02 |
| SON          | 4.19E-01 | 3.54E-01 | 2.88 | 6.49 | 3.13E-02 |
| CENPT        | 4.19E-01 | 3.54E-01 | 2.88 | 6.49 | 3.14E-02 |
| LOC105373966 | 4.19E-01 | 3.54E-01 | 2.88 | 6.48 | 3.14E-02 |
| LINC02587    | 4.18E-01 | 3.53E-01 | 2.89 | 6.47 | 3.15E-02 |
| PANCR        | 4.18E-01 | 3.53E-01 | 2.89 | 6.47 | 3.16E-02 |
| LOC105375689 | 4.18E-01 | 3.53E-01 | 2.89 | 6.45 | 3.17E-02 |
| LOC107986938 | 4.18E-01 | 3.53E-01 | 2.89 | 6.45 | 3.17E-02 |
| ZNF321P      | 4.17E-01 | 3.53E-01 | 2.89 | 6.45 | 3.17E-02 |
| FGF12.AS1    | 4.17E-01 | 3.53E-01 | 2.89 | 6.45 | 3.17E-02 |
| TRG.CCC2.1   | 4.17E-01 | 3.53E-01 | 2.89 | 6.45 | 3.18E-02 |
| LOC100128253 | 4.17E-01 | 3.53E-01 | 2.89 | 6.44 | 3.18E-02 |
| XKR4         | 4.17E-01 | 3.52E-01 | 2.89 | 6.44 | 3.19E-02 |
| FCRL1        | 4.17E-01 | 3.52E-01 | 2.89 | 6.43 | 3.19E-02 |
| LOC112267888 | 4.17E-01 | 3.52E-01 | 2.89 | 6.43 | 3.19E-02 |
| LINC00412    | 4.17E-01 | 3.52E-01 | 2.89 | 6.43 | 3.20E-02 |
| LINC02757    | 4.16E-01 | 3.52E-01 | 2.89 | 6.42 | 3.20E-02 |
| MIR2276      | 4.16E-01 | 3.51E-01 | 2.89 | 6.41 | 3.21E-02 |
| LOC105369811 | 4.16E-01 | 3.51E-01 | 2.89 | 6.41 | 3.22E-02 |
| LOC105375272 | 4.16E-01 | 3.51E-01 | 2.89 | 6.40 | 3.22E-02 |
| LINC01221    | 4.16E-01 | 3.51E-01 | 2.89 | 6.40 | 3.23E-02 |
| TBPL2        | 4.15E-01 | 3.50E-01 | 2.89 | 6.40 | 3.23E-02 |
| NKAPP1       | 4.15E-01 | 3.50E-01 | 2.89 | 6.40 | 3.23E-02 |
| TMEM99       | 4.15E-01 | 3.50E-01 | 2.89 | 6.39 | 3.23E-02 |

|                |          |          |      |      |          |
|----------------|----------|----------|------|------|----------|
| SLC38A5        | 4.15E-01 | 3.50E-01 | 2.89 | 6.39 | 3.23E-02 |
| LOC105375772   | 4.15E-01 | 3.50E-01 | 2.89 | 6.39 | 3.24E-02 |
| LOC112268413   | 4.15E-01 | 3.50E-01 | 2.89 | 6.39 | 3.24E-02 |
| LOC105377459   | 4.15E-01 | 3.50E-01 | 2.89 | 6.39 | 3.24E-02 |
| PMEL           | 4.15E-01 | 3.50E-01 | 2.89 | 6.38 | 3.24E-02 |
| SLC29A3        | 4.15E-01 | 3.50E-01 | 2.89 | 6.38 | 3.25E-02 |
| CSRP1          | 4.15E-01 | 3.50E-01 | 2.89 | 6.38 | 3.25E-02 |
| HLA.C_3        | 4.14E-01 | 3.49E-01 | 2.89 | 6.37 | 3.26E-02 |
| PRAP1          | 4.14E-01 | 3.49E-01 | 2.89 | 6.37 | 3.26E-02 |
| MIR8086        | 4.14E-01 | 3.49E-01 | 2.89 | 6.37 | 3.26E-02 |
| GFOD2          | 4.14E-01 | 3.49E-01 | 2.89 | 6.37 | 3.26E-02 |
| UBE2D1         | 4.14E-01 | 3.49E-01 | 2.89 | 6.36 | 3.26E-02 |
| DDX27          | 4.14E-01 | 3.49E-01 | 2.90 | 6.36 | 3.27E-02 |
| RSPH1          | 4.14E-01 | 3.49E-01 | 2.90 | 6.36 | 3.27E-02 |
| C6orf120       | 4.14E-01 | 3.49E-01 | 2.90 | 6.35 | 3.27E-02 |
| HSD11B2        | 4.14E-01 | 3.49E-01 | 2.90 | 6.35 | 3.28E-02 |
| LOC101929653   | 4.14E-01 | 3.48E-01 | 2.90 | 6.35 | 3.28E-02 |
| PMVK           | 4.14E-01 | 3.48E-01 | 2.90 | 6.35 | 3.28E-02 |
| LINC02607      | 4.13E-01 | 3.48E-01 | 2.90 | 6.35 | 3.28E-02 |
| SETD1A         | 4.13E-01 | 3.48E-01 | 2.90 | 6.34 | 3.28E-02 |
| RNF217.AS1     | 4.13E-01 | 3.48E-01 | 2.90 | 6.34 | 3.29E-02 |
| LOC105375879   | 4.13E-01 | 3.48E-01 | 2.90 | 6.33 | 3.29E-02 |
| CCDC180        | 4.13E-01 | 3.48E-01 | 2.90 | 6.33 | 3.30E-02 |
| NUP62          | 4.13E-01 | 3.48E-01 | 2.90 | 6.33 | 3.30E-02 |
| RPS26P11       | 4.13E-01 | 3.48E-01 | 2.90 | 6.33 | 3.30E-02 |
| LOC105371279   | 4.13E-01 | 3.47E-01 | 2.90 | 6.32 | 3.31E-02 |
| TNFRSF10B      | 4.12E-01 | 3.47E-01 | 2.90 | 6.31 | 3.32E-02 |
| LANCL3         | 4.12E-01 | 3.47E-01 | 2.90 | 6.31 | 3.32E-02 |
| LOC102724463   | 4.12E-01 | 3.47E-01 | 2.90 | 6.31 | 3.32E-02 |
| CRYZL2P.SEC16B | 4.12E-01 | 3.46E-01 | 2.90 | 6.30 | 3.33E-02 |
| PPP3CB.AS1     | 4.11E-01 | 3.46E-01 | 2.90 | 6.29 | 3.35E-02 |
| LOC105374591   | 4.11E-01 | 3.46E-01 | 2.90 | 6.28 | 3.35E-02 |
| CSF2           | 4.11E-01 | 3.45E-01 | 2.90 | 6.27 | 3.36E-02 |
| LOC107985235   | 4.11E-01 | 3.45E-01 | 2.90 | 6.27 | 3.36E-02 |
| LOC101927359   | 4.11E-01 | 3.45E-01 | 2.90 | 6.27 | 3.36E-02 |
| TCEAL5         | 4.11E-01 | 3.45E-01 | 2.90 | 6.27 | 3.36E-02 |
| LOC105378512   | 4.11E-01 | 3.45E-01 | 2.90 | 6.27 | 3.36E-02 |
| NBPF7          | 4.10E-01 | 3.45E-01 | 2.91 | 6.26 | 3.38E-02 |
| CTCF           | 4.10E-01 | 3.44E-01 | 2.91 | 6.25 | 3.39E-02 |
| SLC33A1        | 4.10E-01 | 3.44E-01 | 2.91 | 6.24 | 3.39E-02 |
| LOC105376070   | 4.10E-01 | 3.44E-01 | 2.91 | 6.24 | 3.40E-02 |



|              |          |          |      |      |          |
|--------------|----------|----------|------|------|----------|
| LOC105369149 | 4.09E-01 | 3.44E-01 | 2.91 | 6.24 | 3.40E-02 |
| LOC105370846 | 4.09E-01 | 3.43E-01 | 2.91 | 6.23 | 3.41E-02 |
| MAN2A1       | 4.09E-01 | 3.43E-01 | 2.91 | 6.23 | 3.41E-02 |
| LOC107985981 | 4.09E-01 | 3.43E-01 | 2.91 | 6.23 | 3.41E-02 |
| LOC105373075 | 4.09E-01 | 3.43E-01 | 2.91 | 6.23 | 3.41E-02 |
| LOC107986843 | 4.09E-01 | 3.43E-01 | 2.91 | 6.22 | 3.42E-02 |
| LOC107987027 | 4.09E-01 | 3.43E-01 | 2.91 | 6.22 | 3.42E-02 |
| RRP12        | 4.09E-01 | 3.43E-01 | 2.91 | 6.22 | 3.42E-02 |
| TRNG         | 4.08E-01 | 3.42E-01 | 2.91 | 6.21 | 3.43E-02 |
| LOC105375481 | 4.08E-01 | 3.42E-01 | 2.91 | 6.21 | 3.44E-02 |
| LINC00871_1  | 4.08E-01 | 3.42E-01 | 2.91 | 6.20 | 3.44E-02 |
| SH2D7        | 4.08E-01 | 3.42E-01 | 2.91 | 6.20 | 3.44E-02 |
| TRPV6_1      | 4.08E-01 | 3.42E-01 | 2.91 | 6.20 | 3.44E-02 |
| LOC105372770 | 4.08E-01 | 3.42E-01 | 2.91 | 6.19 | 3.45E-02 |
| MRPS30.DT    | 4.08E-01 | 3.42E-01 | 2.91 | 6.19 | 3.45E-02 |
| MRI1         | 4.07E-01 | 3.42E-01 | 2.91 | 6.19 | 3.46E-02 |
| HAGHL        | 4.07E-01 | 3.41E-01 | 2.91 | 6.18 | 3.46E-02 |
| NAGK         | 4.07E-01 | 3.41E-01 | 2.91 | 6.18 | 3.47E-02 |
| LAMC1.AS1    | 4.07E-01 | 3.41E-01 | 2.91 | 6.18 | 3.47E-02 |
| ADGRF5.AS1   | 4.07E-01 | 3.41E-01 | 2.91 | 6.17 | 3.47E-02 |
| LOC105375672 | 4.07E-01 | 3.41E-01 | 2.91 | 6.17 | 3.48E-02 |
| LOC105373743 | 4.06E-01 | 3.41E-01 | 2.91 | 6.16 | 3.48E-02 |
| LOC107984214 | 4.06E-01 | 3.40E-01 | 2.91 | 6.16 | 3.49E-02 |
| LOC105371414 | 4.06E-01 | 3.40E-01 | 2.91 | 6.16 | 3.49E-02 |
| LOC105376030 | 4.06E-01 | 3.40E-01 | 2.91 | 6.16 | 3.49E-02 |
| EMILIN1      | 4.06E-01 | 3.40E-01 | 2.91 | 6.16 | 3.49E-02 |
| LOC101927452 | 4.06E-01 | 3.40E-01 | 2.91 | 6.16 | 3.49E-02 |
| TTLL4        | 4.06E-01 | 3.40E-01 | 2.91 | 6.16 | 3.49E-02 |
| LOC105374616 | 4.06E-01 | 3.40E-01 | 2.92 | 6.15 | 3.50E-02 |
| SH3BGRL      | 4.06E-01 | 3.40E-01 | 2.92 | 6.14 | 3.51E-02 |
| TMEM191B     | 4.06E-01 | 3.40E-01 | 2.92 | 6.14 | 3.51E-02 |
| SNHG17       | 4.06E-01 | 3.40E-01 | 2.92 | 6.14 | 3.51E-02 |
| GCC2.AS1     | 4.06E-01 | 3.40E-01 | 2.92 | 6.14 | 3.51E-02 |
| LOC105370789 | 4.05E-01 | 3.39E-01 | 2.92 | 6.14 | 3.52E-02 |
| LINC01798    | 4.05E-01 | 3.38E-01 | 2.92 | 6.11 | 3.54E-02 |
| MIR2392      | 4.04E-01 | 3.38E-01 | 2.92 | 6.10 | 3.56E-02 |
| FBXL3        | 4.04E-01 | 3.38E-01 | 2.92 | 6.10 | 3.56E-02 |
| PYCR1        | 4.04E-01 | 3.37E-01 | 2.92 | 6.09 | 3.57E-02 |
| AACSP1       | 4.04E-01 | 3.37E-01 | 2.92 | 6.09 | 3.57E-02 |
| LINC01232    | 4.03E-01 | 3.37E-01 | 2.92 | 6.09 | 3.57E-02 |
| LOC100506675 | 4.03E-01 | 3.37E-01 | 2.92 | 6.09 | 3.57E-02 |

|              |          |          |      |      |          |
|--------------|----------|----------|------|------|----------|
| LOC105370563 | 4.03E-01 | 3.37E-01 | 2.92 | 6.09 | 3.57E-02 |
| LOC107986662 | 4.03E-01 | 3.37E-01 | 2.92 | 6.09 | 3.57E-02 |
| LOC107984374 | 4.03E-01 | 3.37E-01 | 2.92 | 6.09 | 3.58E-02 |
| LOC105374952 | 4.03E-01 | 3.37E-01 | 2.92 | 6.08 | 3.58E-02 |
| LOC105373211 | 4.03E-01 | 3.37E-01 | 2.92 | 6.08 | 3.58E-02 |
| LOC105379179 | 4.03E-01 | 3.37E-01 | 2.92 | 6.08 | 3.59E-02 |
| LOC107984362 | 4.03E-01 | 3.36E-01 | 2.92 | 6.07 | 3.60E-02 |
| LOC107985699 | 4.03E-01 | 3.36E-01 | 2.92 | 6.07 | 3.60E-02 |
| RABGAP1L     | 4.03E-01 | 3.36E-01 | 2.92 | 6.06 | 3.60E-02 |
| LAMB2P1      | 4.02E-01 | 3.36E-01 | 2.92 | 6.06 | 3.60E-02 |
| CCL8         | 4.02E-01 | 3.36E-01 | 2.92 | 6.06 | 3.61E-02 |
| TRNP         | 4.02E-01 | 3.36E-01 | 2.92 | 6.06 | 3.61E-02 |
| LOC105371732 | 4.02E-01 | 3.36E-01 | 2.92 | 6.06 | 3.61E-02 |
| SLC25A32     | 4.02E-01 | 3.36E-01 | 2.92 | 6.06 | 3.61E-02 |
| SMPD5        | 4.02E-01 | 3.36E-01 | 2.92 | 6.05 | 3.61E-02 |
| LINC00851    | 4.02E-01 | 3.36E-01 | 2.92 | 6.05 | 3.61E-02 |
| RBM38.AS1    | 4.02E-01 | 3.35E-01 | 2.93 | 6.05 | 3.62E-02 |
| MIR620       | 4.01E-01 | 3.35E-01 | 2.93 | 6.04 | 3.63E-02 |
| KRT24        | 4.01E-01 | 3.35E-01 | 2.93 | 6.04 | 3.63E-02 |
| LOC105372448 | 4.01E-01 | 3.35E-01 | 2.93 | 6.03 | 3.64E-02 |
| CREBZF       | 4.01E-01 | 3.35E-01 | 2.93 | 6.03 | 3.64E-02 |
| LOC107986969 | 4.01E-01 | 3.35E-01 | 2.93 | 6.03 | 3.64E-02 |
| LOC105378864 | 4.01E-01 | 3.35E-01 | 2.93 | 6.03 | 3.64E-02 |
| LOC105372862 | 4.01E-01 | 3.35E-01 | 2.93 | 6.03 | 3.65E-02 |
| LOC105374052 | 4.01E-01 | 3.34E-01 | 2.93 | 6.02 | 3.66E-02 |
| NDUFC2       | 4.01E-01 | 3.34E-01 | 2.93 | 6.02 | 3.66E-02 |
| LOC105378658 | 4.00E-01 | 3.34E-01 | 2.93 | 6.01 | 3.67E-02 |
| LOC105377971 | 4.00E-01 | 3.34E-01 | 2.93 | 6.01 | 3.67E-02 |
| IMP3         | 4.00E-01 | 3.34E-01 | 2.93 | 6.01 | 3.67E-02 |
| PPP4R2       | 4.00E-01 | 3.34E-01 | 2.93 | 6.01 | 3.67E-02 |
| LOC100653049 | 4.00E-01 | 3.33E-01 | 2.93 | 6.00 | 3.68E-02 |
| LOC105375845 | 4.00E-01 | 3.33E-01 | 2.93 | 6.00 | 3.68E-02 |
| LOC105373985 | 4.00E-01 | 3.33E-01 | 2.93 | 6.00 | 3.68E-02 |
| KRT34_1      | 4.00E-01 | 3.33E-01 | 2.93 | 5.99 | 3.69E-02 |
| VMO1         | 4.00E-01 | 3.33E-01 | 2.93 | 5.99 | 3.69E-02 |
| OR7C1        | 3.99E-01 | 3.33E-01 | 2.93 | 5.99 | 3.70E-02 |
| LOC101929418 | 3.99E-01 | 3.33E-01 | 2.93 | 5.98 | 3.70E-02 |
| LACTBL1      | 3.99E-01 | 3.33E-01 | 2.93 | 5.98 | 3.70E-02 |
| MYOM3.AS1    | 3.99E-01 | 3.32E-01 | 2.93 | 5.98 | 3.70E-02 |
| RAVER2       | 3.99E-01 | 3.32E-01 | 2.93 | 5.98 | 3.71E-02 |
| DHRS2        | 3.99E-01 | 3.32E-01 | 2.93 | 5.98 | 3.71E-02 |

|              |          |          |      |      |          |
|--------------|----------|----------|------|------|----------|
| LOC105369302 | 3.99E-01 | 3.32E-01 | 2.93 | 5.97 | 3.71E-02 |
| LOC105374096 | 3.99E-01 | 3.32E-01 | 2.93 | 5.97 | 3.71E-02 |
| OR2M4        | 3.99E-01 | 3.32E-01 | 2.93 | 5.97 | 3.71E-02 |
| LOC105373283 | 3.99E-01 | 3.32E-01 | 2.93 | 5.97 | 3.71E-02 |
| KLK15        | 3.99E-01 | 3.32E-01 | 2.93 | 5.97 | 3.71E-02 |
| LOC112268471 | 3.99E-01 | 3.32E-01 | 2.93 | 5.97 | 3.72E-02 |
| TAF9B        | 3.99E-01 | 3.32E-01 | 2.93 | 5.97 | 3.72E-02 |
| C6orf99      | 3.99E-01 | 3.32E-01 | 2.93 | 5.96 | 3.72E-02 |
| EFEMP1       | 3.99E-01 | 3.32E-01 | 2.93 | 5.96 | 3.73E-02 |
| LINC01512    | 3.98E-01 | 3.32E-01 | 2.93 | 5.96 | 3.73E-02 |
| MIR5695      | 3.98E-01 | 3.32E-01 | 2.93 | 5.96 | 3.73E-02 |
| NCOA5        | 3.98E-01 | 3.32E-01 | 2.93 | 5.96 | 3.73E-02 |
| ZNF474       | 3.98E-01 | 3.32E-01 | 2.93 | 5.96 | 3.73E-02 |
| TRGV11       | 3.98E-01 | 3.31E-01 | 2.93 | 5.95 | 3.74E-02 |
| LOC107984379 | 3.98E-01 | 3.31E-01 | 2.93 | 5.95 | 3.74E-02 |
| LOC105377927 | 3.98E-01 | 3.31E-01 | 2.94 | 5.94 | 3.75E-02 |
| LINC02112    | 3.97E-01 | 3.31E-01 | 2.94 | 5.94 | 3.76E-02 |
| LOC105372757 | 3.97E-01 | 3.30E-01 | 2.94 | 5.94 | 3.76E-02 |
| TSPAN5       | 3.97E-01 | 3.30E-01 | 2.94 | 5.93 | 3.76E-02 |
| KCTD18       | 3.97E-01 | 3.30E-01 | 2.94 | 5.93 | 3.76E-02 |
| LOC105369783 | 3.97E-01 | 3.30E-01 | 2.94 | 5.92 | 3.78E-02 |
| LOC107984778 | 3.96E-01 | 3.29E-01 | 2.94 | 5.91 | 3.79E-02 |
| INKA2        | 3.96E-01 | 3.29E-01 | 2.94 | 5.91 | 3.80E-02 |
| LOC107986148 | 3.96E-01 | 3.29E-01 | 2.94 | 5.90 | 3.80E-02 |
| DPP4.DT      | 3.96E-01 | 3.29E-01 | 2.94 | 5.90 | 3.81E-02 |
| LOC107985021 | 3.96E-01 | 3.29E-01 | 2.94 | 5.90 | 3.81E-02 |
| SLC25A45     | 3.96E-01 | 3.29E-01 | 2.94 | 5.90 | 3.81E-02 |
| LOC105374901 | 3.96E-01 | 3.29E-01 | 2.94 | 5.90 | 3.81E-02 |
| LOC107986179 | 3.96E-01 | 3.29E-01 | 2.94 | 5.89 | 3.81E-02 |
| DPT          | 3.96E-01 | 3.29E-01 | 2.94 | 5.89 | 3.81E-02 |
| RBM3         | 3.96E-01 | 3.28E-01 | 2.94 | 5.89 | 3.82E-02 |
| HSPC324      | 3.96E-01 | 3.28E-01 | 2.94 | 5.89 | 3.82E-02 |
| LOC107984590 | 3.95E-01 | 3.28E-01 | 2.94 | 5.89 | 3.82E-02 |
| BLID         | 3.95E-01 | 3.28E-01 | 2.94 | 5.88 | 3.83E-02 |
| LINC01903    | 3.95E-01 | 3.28E-01 | 2.94 | 5.88 | 3.83E-02 |
| LINC02316    | 3.95E-01 | 3.28E-01 | 2.94 | 5.88 | 3.83E-02 |
| ILF2         | 3.95E-01 | 3.28E-01 | 2.94 | 5.88 | 3.83E-02 |
| LOC107986105 | 3.95E-01 | 3.28E-01 | 2.94 | 5.88 | 3.84E-02 |
| RHCE         | 3.95E-01 | 3.27E-01 | 2.94 | 5.87 | 3.84E-02 |
| GPR32        | 3.95E-01 | 3.27E-01 | 2.94 | 5.87 | 3.85E-02 |
| LOC105378416 | 3.94E-01 | 3.27E-01 | 2.94 | 5.86 | 3.86E-02 |

|              |          |          |      |      |          |
|--------------|----------|----------|------|------|----------|
| LOC102724194 | 3.94E-01 | 3.27E-01 | 2.94 | 5.85 | 3.87E-02 |
| FAM247D      | 3.94E-01 | 3.27E-01 | 2.94 | 5.85 | 3.87E-02 |
| LOC105377495 | 3.94E-01 | 3.26E-01 | 2.95 | 5.84 | 3.88E-02 |
| LOC440313    | 3.94E-01 | 3.26E-01 | 2.95 | 5.84 | 3.88E-02 |
| MGC15885     | 3.93E-01 | 3.26E-01 | 2.95 | 5.84 | 3.88E-02 |
| ECI2         | 3.93E-01 | 3.26E-01 | 2.95 | 5.84 | 3.88E-02 |
| LOC105379393 | 3.93E-01 | 3.26E-01 | 2.95 | 5.84 | 3.89E-02 |
| LOC102724700 | 3.93E-01 | 3.26E-01 | 2.95 | 5.84 | 3.89E-02 |
| NUDT18       | 3.93E-01 | 3.26E-01 | 2.95 | 5.83 | 3.90E-02 |
| TAS2R50_2    | 3.93E-01 | 3.25E-01 | 2.95 | 5.82 | 3.91E-02 |
| LOC107987304 | 3.93E-01 | 3.25E-01 | 2.95 | 5.82 | 3.91E-02 |
| LOC105374643 | 3.93E-01 | 3.25E-01 | 2.95 | 5.82 | 3.91E-02 |
| LINC01893    | 3.93E-01 | 3.25E-01 | 2.95 | 5.82 | 3.91E-02 |
| AFDN         | 3.93E-01 | 3.25E-01 | 2.95 | 5.81 | 3.92E-02 |
| VPS9D1.AS1   | 3.92E-01 | 3.25E-01 | 2.95 | 5.81 | 3.92E-02 |
| LOC107985809 | 3.92E-01 | 3.25E-01 | 2.95 | 5.81 | 3.93E-02 |
| LOC102467217 | 3.92E-01 | 3.25E-01 | 2.95 | 5.80 | 3.93E-02 |
| TRT.AGT4.1   | 3.92E-01 | 3.24E-01 | 2.95 | 5.80 | 3.94E-02 |
| LINC02557_1  | 3.92E-01 | 3.24E-01 | 2.95 | 5.79 | 3.94E-02 |
| MIR210HG     | 3.92E-01 | 3.24E-01 | 2.95 | 5.79 | 3.94E-02 |
| EML2.AS1     | 3.92E-01 | 3.24E-01 | 2.95 | 5.79 | 3.94E-02 |
| CCDC107      | 3.92E-01 | 3.24E-01 | 2.95 | 5.79 | 3.95E-02 |
| LINC01711    | 3.92E-01 | 3.24E-01 | 2.95 | 5.79 | 3.95E-02 |
| MTHFD2P1     | 3.92E-01 | 3.24E-01 | 2.95 | 5.79 | 3.95E-02 |
| MIR1.1HG     | 3.91E-01 | 3.24E-01 | 2.95 | 5.79 | 3.95E-02 |
| LINC02442    | 3.91E-01 | 3.24E-01 | 2.95 | 5.79 | 3.95E-02 |
| LINC02260    | 3.91E-01 | 3.24E-01 | 2.95 | 5.79 | 3.95E-02 |
| LOC100287944 | 3.91E-01 | 3.24E-01 | 2.95 | 5.79 | 3.95E-02 |
| LOC105373644 | 3.91E-01 | 3.24E-01 | 2.95 | 5.78 | 3.96E-02 |
| LINC02633    | 3.91E-01 | 3.23E-01 | 2.95 | 5.78 | 3.96E-02 |
| LOC105373347 | 3.91E-01 | 3.23E-01 | 2.95 | 5.78 | 3.97E-02 |
| LOC105379314 | 3.91E-01 | 3.23E-01 | 2.95 | 5.77 | 3.97E-02 |
| HAUS2        | 3.90E-01 | 3.23E-01 | 2.95 | 5.76 | 3.98E-02 |
| C8G          | 3.90E-01 | 3.22E-01 | 2.95 | 5.76 | 4.00E-02 |
| LINC00265    | 3.90E-01 | 3.22E-01 | 2.95 | 5.75 | 4.00E-02 |
| GS1.279B7.1  | 3.90E-01 | 3.22E-01 | 2.95 | 5.75 | 4.00E-02 |
| SNORD1A      | 3.90E-01 | 3.22E-01 | 2.95 | 5.75 | 4.00E-02 |
| GOLGA8EP     | 3.90E-01 | 3.22E-01 | 2.95 | 5.75 | 4.00E-02 |
| LOC105376428 | 3.90E-01 | 3.22E-01 | 2.95 | 5.75 | 4.01E-02 |
| NIP7         | 3.90E-01 | 3.22E-01 | 2.95 | 5.75 | 4.01E-02 |
| LOC105377697 | 3.90E-01 | 3.22E-01 | 2.95 | 5.75 | 4.01E-02 |

|              |          |          |      |      |          |
|--------------|----------|----------|------|------|----------|
| FUZ          | 3.89E-01 | 3.22E-01 | 2.96 | 5.74 | 4.02E-02 |
| TAS1R1       | 3.89E-01 | 3.22E-01 | 2.96 | 5.74 | 4.02E-02 |
| MYH7         | 3.89E-01 | 3.22E-01 | 2.96 | 5.74 | 4.02E-02 |
| IRGM         | 3.89E-01 | 3.21E-01 | 2.96 | 5.74 | 4.02E-02 |
| PLSCR5       | 3.89E-01 | 3.21E-01 | 2.96 | 5.74 | 4.02E-02 |
| SNORD114.4   | 3.89E-01 | 3.21E-01 | 2.96 | 5.74 | 4.02E-02 |
| LOC105374681 | 3.89E-01 | 3.21E-01 | 2.96 | 5.73 | 4.02E-02 |
| CASC19       | 3.89E-01 | 3.21E-01 | 2.96 | 5.73 | 4.03E-02 |
| PPP4R3B      | 3.89E-01 | 3.21E-01 | 2.96 | 5.72 | 4.04E-02 |
| LINC02216    | 3.88E-01 | 3.20E-01 | 2.96 | 5.72 | 4.05E-02 |
| FRY          | 3.88E-01 | 3.20E-01 | 2.96 | 5.71 | 4.05E-02 |
| CHRNA3       | 3.88E-01 | 3.20E-01 | 2.96 | 5.71 | 4.06E-02 |
| KAT7         | 3.88E-01 | 3.20E-01 | 2.96 | 5.71 | 4.06E-02 |
| LOC105369725 | 3.88E-01 | 3.20E-01 | 2.96 | 5.71 | 4.06E-02 |
| IGLVI.63     | 3.88E-01 | 3.20E-01 | 2.96 | 5.70 | 4.07E-02 |
| LINC00921    | 3.88E-01 | 3.20E-01 | 2.96 | 5.70 | 4.07E-02 |
| HEXA         | 3.88E-01 | 3.20E-01 | 2.96 | 5.70 | 4.08E-02 |
| ZNF564       | 3.88E-01 | 3.20E-01 | 2.96 | 5.70 | 4.08E-02 |
| PRKCZ.AS1    | 3.87E-01 | 3.19E-01 | 2.96 | 5.69 | 4.08E-02 |
| LOC105377703 | 3.87E-01 | 3.19E-01 | 2.96 | 5.69 | 4.08E-02 |
| LOC101928782 | 3.87E-01 | 3.19E-01 | 2.96 | 5.69 | 4.09E-02 |
| CTLA4        | 3.87E-01 | 3.19E-01 | 2.96 | 5.69 | 4.09E-02 |
| LOC105370262 | 3.87E-01 | 3.19E-01 | 2.96 | 5.69 | 4.09E-02 |
| LOC101409256 | 3.87E-01 | 3.19E-01 | 2.96 | 5.68 | 4.09E-02 |
| LINC02728    | 3.87E-01 | 3.19E-01 | 2.96 | 5.68 | 4.10E-02 |
| PNPLA5       | 3.87E-01 | 3.19E-01 | 2.96 | 5.68 | 4.10E-02 |
| LOC105377469 | 3.87E-01 | 3.19E-01 | 2.96 | 5.68 | 4.10E-02 |
| LOC107985305 | 3.87E-01 | 3.19E-01 | 2.96 | 5.67 | 4.11E-02 |
| C14orf28     | 3.86E-01 | 3.18E-01 | 2.96 | 5.67 | 4.12E-02 |
| LOC105373855 | 3.86E-01 | 3.18E-01 | 2.96 | 5.66 | 4.12E-02 |
| LOC105369808 | 3.86E-01 | 3.18E-01 | 2.96 | 5.66 | 4.12E-02 |
| BMPR1A       | 3.86E-01 | 3.18E-01 | 2.96 | 5.66 | 4.13E-02 |
| OR14J1_5     | 3.86E-01 | 3.18E-01 | 2.96 | 5.66 | 4.13E-02 |
| LINC.PINT    | 3.86E-01 | 3.18E-01 | 2.96 | 5.66 | 4.14E-02 |
| LINC00884    | 3.86E-01 | 3.18E-01 | 2.96 | 5.65 | 4.14E-02 |
| DPY19L2      | 3.86E-01 | 3.17E-01 | 2.96 | 5.65 | 4.14E-02 |
| LOC105378626 | 3.86E-01 | 3.17E-01 | 2.96 | 5.65 | 4.14E-02 |
| MACIR        | 3.86E-01 | 3.17E-01 | 2.97 | 5.65 | 4.15E-02 |
| CASC22       | 3.85E-01 | 3.17E-01 | 2.97 | 5.64 | 4.15E-02 |
| CMAHP        | 3.85E-01 | 3.17E-01 | 2.97 | 5.64 | 4.15E-02 |
| NBPF15       | 3.85E-01 | 3.17E-01 | 2.97 | 5.64 | 4.16E-02 |

|              |          |          |      |      |          |
|--------------|----------|----------|------|------|----------|
| ELOVL2.AS1   | 3.85E-01 | 3.17E-01 | 2.97 | 5.64 | 4.16E-02 |
| LOC105374009 | 3.85E-01 | 3.17E-01 | 2.97 | 5.64 | 4.16E-02 |
| FZD5         | 3.85E-01 | 3.17E-01 | 2.97 | 5.64 | 4.16E-02 |
| CABP2        | 3.85E-01 | 3.17E-01 | 2.97 | 5.64 | 4.16E-02 |
| DSPP         | 3.85E-01 | 3.17E-01 | 2.97 | 5.63 | 4.17E-02 |
| RGS19        | 3.85E-01 | 3.16E-01 | 2.97 | 5.63 | 4.17E-02 |
| SDHB         | 3.85E-01 | 3.16E-01 | 2.97 | 5.63 | 4.18E-02 |
| LINC01031    | 3.84E-01 | 3.16E-01 | 2.97 | 5.62 | 4.18E-02 |
| LOC105372004 | 3.84E-01 | 3.16E-01 | 2.97 | 5.62 | 4.19E-02 |
| LOC107985437 | 3.84E-01 | 3.16E-01 | 2.97 | 5.61 | 4.20E-02 |
| KHSRP        | 3.84E-01 | 3.15E-01 | 2.97 | 5.61 | 4.21E-02 |
| LOC105377796 | 3.84E-01 | 3.15E-01 | 2.97 | 5.60 | 4.21E-02 |
| LINC02050    | 3.84E-01 | 3.15E-01 | 2.97 | 5.60 | 4.21E-02 |
| LOC107987004 | 3.84E-01 | 3.15E-01 | 2.97 | 5.60 | 4.21E-02 |
| MAPK8IP1P2   | 3.84E-01 | 3.15E-01 | 2.97 | 5.60 | 4.21E-02 |
| ST6GALNAC6   | 3.84E-01 | 3.15E-01 | 2.97 | 5.60 | 4.22E-02 |
| ZMAT3        | 3.83E-01 | 3.15E-01 | 2.97 | 5.60 | 4.22E-02 |
| HIGD1A       | 3.83E-01 | 3.15E-01 | 2.97 | 5.60 | 4.22E-02 |
| C2CD4D.AS1   | 3.83E-01 | 3.15E-01 | 2.97 | 5.59 | 4.23E-02 |
| SUPT4H1      | 3.83E-01 | 3.15E-01 | 2.97 | 5.59 | 4.23E-02 |
| HMGB1        | 3.83E-01 | 3.15E-01 | 2.97 | 5.59 | 4.23E-02 |
| LINC01136    | 3.83E-01 | 3.15E-01 | 2.97 | 5.59 | 4.23E-02 |
| LOC105379355 | 3.83E-01 | 3.15E-01 | 2.97 | 5.59 | 4.23E-02 |
| TLR4         | 3.83E-01 | 3.14E-01 | 2.97 | 5.58 | 4.25E-02 |
| LOC107984932 | 3.83E-01 | 3.14E-01 | 2.97 | 5.58 | 4.25E-02 |
| TRIM67.AS1   | 3.82E-01 | 3.14E-01 | 2.97 | 5.57 | 4.25E-02 |
| RAB27B       | 3.82E-01 | 3.14E-01 | 2.97 | 5.57 | 4.26E-02 |
| LOC105371312 | 3.82E-01 | 3.14E-01 | 2.97 | 5.57 | 4.26E-02 |
| CZIB         | 3.82E-01 | 3.14E-01 | 2.97 | 5.57 | 4.26E-02 |
| PCDHGB6      | 3.82E-01 | 3.14E-01 | 2.97 | 5.57 | 4.26E-02 |
| CNIH4        | 3.82E-01 | 3.13E-01 | 2.97 | 5.57 | 4.27E-02 |
| MS4A3        | 3.82E-01 | 3.13E-01 | 2.97 | 5.55 | 4.28E-02 |
| BHLHE40.AS1  | 3.82E-01 | 3.13E-01 | 2.97 | 5.55 | 4.29E-02 |
| TRAF7        | 3.82E-01 | 3.13E-01 | 2.97 | 5.55 | 4.29E-02 |
| C22orf31     | 3.81E-01 | 3.13E-01 | 2.98 | 5.55 | 4.29E-02 |
| LOC112268254 | 3.81E-01 | 3.13E-01 | 2.98 | 5.55 | 4.30E-02 |
| LRRC4        | 3.81E-01 | 3.12E-01 | 2.98 | 5.54 | 4.30E-02 |
| SLC4A9       | 3.81E-01 | 3.12E-01 | 2.98 | 5.54 | 4.30E-02 |
| LUC7L        | 3.81E-01 | 3.12E-01 | 2.98 | 5.54 | 4.30E-02 |
| LOC105376105 | 3.81E-01 | 3.12E-01 | 2.98 | 5.54 | 4.31E-02 |
| PAGE5        | 3.81E-01 | 3.12E-01 | 2.98 | 5.54 | 4.31E-02 |

|              |          |          |      |      |          |
|--------------|----------|----------|------|------|----------|
| NGLY1        | 3.81E-01 | 3.12E-01 | 2.98 | 5.54 | 4.31E-02 |
| TMEM181      | 3.81E-01 | 3.12E-01 | 2.98 | 5.54 | 4.31E-02 |
| PHF24        | 3.81E-01 | 3.12E-01 | 2.98 | 5.54 | 4.31E-02 |
| LINC01632    | 3.81E-01 | 3.12E-01 | 2.98 | 5.53 | 4.31E-02 |
| TEX36.AS1    | 3.81E-01 | 3.12E-01 | 2.98 | 5.53 | 4.31E-02 |
| MIR563       | 3.81E-01 | 3.12E-01 | 2.98 | 5.53 | 4.32E-02 |
| ZNF733P      | 3.81E-01 | 3.12E-01 | 2.98 | 5.53 | 4.32E-02 |
| ETDC         | 3.81E-01 | 3.12E-01 | 2.98 | 5.53 | 4.32E-02 |
| HSPA1L       | 3.81E-01 | 3.12E-01 | 2.98 | 5.53 | 4.32E-02 |
| TCF15        | 3.80E-01 | 3.12E-01 | 2.98 | 5.53 | 4.32E-02 |
| LINC02852    | 3.80E-01 | 3.12E-01 | 2.98 | 5.52 | 4.33E-02 |
| GPR156       | 3.80E-01 | 3.11E-01 | 2.98 | 5.52 | 4.33E-02 |
| LOC107985941 | 3.80E-01 | 3.11E-01 | 2.98 | 5.52 | 4.33E-02 |
| LOC105370325 | 3.80E-01 | 3.11E-01 | 2.98 | 5.52 | 4.33E-02 |
| BMS1P2.AGAP9 | 3.80E-01 | 3.11E-01 | 2.98 | 5.52 | 4.33E-02 |
| EPO          | 3.80E-01 | 3.11E-01 | 2.98 | 5.52 | 4.33E-02 |
| OBP2A        | 3.80E-01 | 3.11E-01 | 2.98 | 5.52 | 4.34E-02 |
| USP46.DT     | 3.80E-01 | 3.11E-01 | 2.98 | 5.52 | 4.34E-02 |
| LOC105373748 | 3.80E-01 | 3.11E-01 | 2.98 | 5.52 | 4.34E-02 |
| LINC01374    | 3.80E-01 | 3.11E-01 | 2.98 | 5.51 | 4.35E-02 |
| RASGRP3.AS1  | 3.80E-01 | 3.11E-01 | 2.98 | 5.51 | 4.36E-02 |
| LINC01256    | 3.80E-01 | 3.11E-01 | 2.98 | 5.51 | 4.36E-02 |
| ZC3H12D      | 3.80E-01 | 3.11E-01 | 2.98 | 5.50 | 4.36E-02 |
| CNNM3.DT     | 3.79E-01 | 3.11E-01 | 2.98 | 5.50 | 4.36E-02 |
| FAM210A      | 3.79E-01 | 3.10E-01 | 2.98 | 5.50 | 4.36E-02 |
| LOC112268127 | 3.79E-01 | 3.10E-01 | 2.98 | 5.50 | 4.36E-02 |
| TAAR3P       | 3.79E-01 | 3.10E-01 | 2.98 | 5.50 | 4.36E-02 |
| CCM2         | 3.79E-01 | 3.10E-01 | 2.98 | 5.50 | 4.36E-02 |
| STK38        | 3.79E-01 | 3.10E-01 | 2.98 | 5.50 | 4.37E-02 |
| BUD23        | 3.79E-01 | 3.10E-01 | 2.98 | 5.50 | 4.37E-02 |
| LOC101928972 | 3.79E-01 | 3.10E-01 | 2.98 | 5.50 | 4.37E-02 |
| LOC102724992 | 3.79E-01 | 3.10E-01 | 2.98 | 5.50 | 4.37E-02 |
| THEM4        | 3.79E-01 | 3.10E-01 | 2.98 | 5.49 | 4.37E-02 |
| LINC02110    | 3.79E-01 | 3.10E-01 | 2.98 | 5.49 | 4.38E-02 |
| LOC105371912 | 3.79E-01 | 3.10E-01 | 2.98 | 5.49 | 4.38E-02 |
| LOC440084    | 3.78E-01 | 3.09E-01 | 2.98 | 5.48 | 4.40E-02 |
| CYTH2        | 3.78E-01 | 3.09E-01 | 2.98 | 5.47 | 4.41E-02 |
| LOC105376631 | 3.78E-01 | 3.09E-01 | 2.98 | 5.47 | 4.41E-02 |
| TRT.AGT1.3   | 3.77E-01 | 3.08E-01 | 2.98 | 5.45 | 4.43E-02 |
| LOC105370077 | 3.77E-01 | 3.08E-01 | 2.98 | 5.45 | 4.44E-02 |
| LOC105373769 | 3.77E-01 | 3.08E-01 | 2.98 | 5.45 | 4.44E-02 |

|              |          |          |      |      |          |
|--------------|----------|----------|------|------|----------|
| TENT5B       | 3.77E-01 | 3.08E-01 | 2.98 | 5.45 | 4.44E-02 |
| H2BC1        | 3.77E-01 | 3.08E-01 | 2.98 | 5.45 | 4.44E-02 |
| DCLK2        | 3.77E-01 | 3.08E-01 | 2.98 | 5.45 | 4.44E-02 |
| LOC107984351 | 3.77E-01 | 3.08E-01 | 2.99 | 5.45 | 4.44E-02 |
| LOC105371403 | 3.77E-01 | 3.08E-01 | 2.99 | 5.45 | 4.44E-02 |
| STOX1        | 3.77E-01 | 3.08E-01 | 2.99 | 5.45 | 4.44E-02 |
| SNORD113.9   | 3.77E-01 | 3.08E-01 | 2.99 | 5.45 | 4.45E-02 |
| LOC107984480 | 3.77E-01 | 3.08E-01 | 2.99 | 5.44 | 4.45E-02 |
| LOC107984548 | 3.77E-01 | 3.07E-01 | 2.99 | 5.44 | 4.46E-02 |
| LOC105375765 | 3.77E-01 | 3.07E-01 | 2.99 | 5.44 | 4.46E-02 |
| KRTAP10.8    | 3.77E-01 | 3.07E-01 | 2.99 | 5.44 | 4.46E-02 |
| LINC02289    | 3.76E-01 | 3.07E-01 | 2.99 | 5.43 | 4.47E-02 |
| LOC105379224 | 3.76E-01 | 3.07E-01 | 2.99 | 5.43 | 4.47E-02 |
| LOC105374735 | 3.76E-01 | 3.07E-01 | 2.99 | 5.43 | 4.47E-02 |
| GRIK1.AS2    | 3.76E-01 | 3.07E-01 | 2.99 | 5.43 | 4.47E-02 |
| LOC107986478 | 3.76E-01 | 3.07E-01 | 2.99 | 5.43 | 4.47E-02 |
| ESX1         | 3.76E-01 | 3.07E-01 | 2.99 | 5.43 | 4.47E-02 |
| LOC399900    | 3.76E-01 | 3.07E-01 | 2.99 | 5.43 | 4.48E-02 |
| FSCN3        | 3.76E-01 | 3.07E-01 | 2.99 | 5.43 | 4.48E-02 |
| LOC107984964 | 3.76E-01 | 3.07E-01 | 2.99 | 5.43 | 4.48E-02 |
| LINC02762    | 3.76E-01 | 3.07E-01 | 2.99 | 5.43 | 4.48E-02 |
| LOC105373890 | 3.76E-01 | 3.07E-01 | 2.99 | 5.42 | 4.49E-02 |
| IL24         | 3.76E-01 | 3.06E-01 | 2.99 | 5.42 | 4.49E-02 |
| OR5AS1       | 3.76E-01 | 3.06E-01 | 2.99 | 5.41 | 4.50E-02 |
| LOC107985486 | 3.75E-01 | 3.06E-01 | 2.99 | 5.41 | 4.50E-02 |
| LOC105374573 | 3.75E-01 | 3.06E-01 | 2.99 | 5.41 | 4.50E-02 |
| LOC105373269 | 3.75E-01 | 3.05E-01 | 2.99 | 5.39 | 4.53E-02 |
| LOC105370210 | 3.75E-01 | 3.05E-01 | 2.99 | 5.39 | 4.53E-02 |
| LOC101241902 | 3.75E-01 | 3.05E-01 | 2.99 | 5.39 | 4.54E-02 |
| MAGEA6.DT    | 3.75E-01 | 3.05E-01 | 2.99 | 5.39 | 4.54E-02 |
| LOC105377017 | 3.75E-01 | 3.05E-01 | 2.99 | 5.39 | 4.54E-02 |
| NECAB3       | 3.74E-01 | 3.04E-01 | 2.99 | 5.38 | 4.56E-02 |
| LOC105377209 | 3.74E-01 | 3.04E-01 | 2.99 | 5.38 | 4.56E-02 |
| NEUROG2.AS1  | 3.74E-01 | 3.04E-01 | 2.99 | 5.38 | 4.56E-02 |
| LOC105375377 | 3.74E-01 | 3.04E-01 | 2.99 | 5.37 | 4.56E-02 |
| RAB31        | 3.74E-01 | 3.04E-01 | 2.99 | 5.37 | 4.56E-02 |
| LOC105375748 | 3.74E-01 | 3.04E-01 | 2.99 | 5.37 | 4.57E-02 |
| LOC105377666 | 3.74E-01 | 3.04E-01 | 2.99 | 5.37 | 4.57E-02 |
| SLC34A2      | 3.74E-01 | 3.04E-01 | 2.99 | 5.37 | 4.57E-02 |
| KIAA1328     | 3.74E-01 | 3.04E-01 | 2.99 | 5.37 | 4.57E-02 |
| ZFP57_2      | 3.74E-01 | 3.04E-01 | 2.99 | 5.37 | 4.57E-02 |



|              |          |          |      |      |          |
|--------------|----------|----------|------|------|----------|
| LOC107987282 | 3.73E-01 | 3.04E-01 | 2.99 | 5.37 | 4.58E-02 |
| FAS.AS1      | 3.73E-01 | 3.04E-01 | 2.99 | 5.37 | 4.58E-02 |
| SRRM2        | 3.73E-01 | 3.04E-01 | 2.99 | 5.36 | 4.58E-02 |
| LOC107984219 | 3.73E-01 | 3.03E-01 | 2.99 | 5.36 | 4.59E-02 |
| LOC105371725 | 3.73E-01 | 3.03E-01 | 3.00 | 5.35 | 4.59E-02 |
| HAUS8        | 3.73E-01 | 3.03E-01 | 3.00 | 5.35 | 4.60E-02 |
| LOC107984220 | 3.73E-01 | 3.03E-01 | 3.00 | 5.35 | 4.60E-02 |
| PEX7         | 3.73E-01 | 3.03E-01 | 3.00 | 5.35 | 4.60E-02 |
| PLD6         | 3.73E-01 | 3.03E-01 | 3.00 | 5.35 | 4.61E-02 |
| ENPP1        | 3.73E-01 | 3.03E-01 | 3.00 | 5.35 | 4.61E-02 |
| SDHAP3       | 3.73E-01 | 3.03E-01 | 3.00 | 5.35 | 4.61E-02 |
| HS6ST1       | 3.72E-01 | 3.03E-01 | 3.00 | 5.34 | 4.61E-02 |
| HTR3E        | 3.72E-01 | 3.03E-01 | 3.00 | 5.34 | 4.62E-02 |
| NPHP1        | 3.72E-01 | 3.02E-01 | 3.00 | 5.34 | 4.62E-02 |
| FAM225B      | 3.72E-01 | 3.02E-01 | 3.00 | 5.33 | 4.63E-02 |
| H1.2         | 3.72E-01 | 3.02E-01 | 3.00 | 5.33 | 4.63E-02 |
| C19orf53     | 3.72E-01 | 3.02E-01 | 3.00 | 5.33 | 4.63E-02 |
| LOC105373521 | 3.72E-01 | 3.02E-01 | 3.00 | 5.33 | 4.63E-02 |
| LOC112267905 | 3.72E-01 | 3.02E-01 | 3.00 | 5.32 | 4.65E-02 |
| LOC105372498 | 3.71E-01 | 3.01E-01 | 3.00 | 5.31 | 4.67E-02 |
| ZBED3.AS1    | 3.71E-01 | 3.01E-01 | 3.00 | 5.31 | 4.67E-02 |
| PTPRM        | 3.71E-01 | 3.01E-01 | 3.00 | 5.31 | 4.67E-02 |
| NKX6.3       | 3.71E-01 | 3.01E-01 | 3.00 | 5.31 | 4.67E-02 |
| STAMBPL1     | 3.71E-01 | 3.01E-01 | 3.00 | 5.30 | 4.68E-02 |
| LINC01493    | 3.71E-01 | 3.01E-01 | 3.00 | 5.30 | 4.68E-02 |
| SLC5A8_1     | 3.70E-01 | 3.01E-01 | 3.00 | 5.30 | 4.69E-02 |
| MVP          | 3.70E-01 | 3.00E-01 | 3.00 | 5.29 | 4.69E-02 |
| RNF14        | 3.70E-01 | 3.00E-01 | 3.00 | 5.29 | 4.70E-02 |
| PNPT1        | 3.70E-01 | 3.00E-01 | 3.00 | 5.29 | 4.71E-02 |
| ZEB2         | 3.70E-01 | 3.00E-01 | 3.00 | 5.29 | 4.71E-02 |
| SIGIRR       | 3.70E-01 | 3.00E-01 | 3.00 | 5.29 | 4.71E-02 |
| LOC105369925 | 3.70E-01 | 3.00E-01 | 3.00 | 5.28 | 4.71E-02 |
| UCP2         | 3.70E-01 | 3.00E-01 | 3.00 | 5.28 | 4.72E-02 |
| LOC153684    | 3.69E-01 | 2.99E-01 | 3.00 | 5.27 | 4.73E-02 |
| LOC105373707 | 3.69E-01 | 2.99E-01 | 3.00 | 5.27 | 4.74E-02 |
| LOC112268313 | 3.69E-01 | 2.99E-01 | 3.00 | 5.27 | 4.74E-02 |
| LINC01348    | 3.69E-01 | 2.99E-01 | 3.00 | 5.26 | 4.75E-02 |
| LOC105371056 | 3.69E-01 | 2.99E-01 | 3.00 | 5.26 | 4.75E-02 |
| GABARAPL3    | 3.69E-01 | 2.99E-01 | 3.00 | 5.26 | 4.75E-02 |
| HOXD1        | 3.69E-01 | 2.99E-01 | 3.01 | 5.26 | 4.75E-02 |
| C1orf210     | 3.69E-01 | 2.98E-01 | 3.01 | 5.25 | 4.76E-02 |

|              |          |          |      |      |          |
|--------------|----------|----------|------|------|----------|
| TRAV34       | 3.69E-01 | 2.98E-01 | 3.01 | 5.25 | 4.76E-02 |
| DNM3.IT1     | 3.68E-01 | 2.98E-01 | 3.01 | 5.25 | 4.77E-02 |
| LINC01778    | 3.68E-01 | 2.98E-01 | 3.01 | 5.25 | 4.77E-02 |
| PUSL1        | 3.68E-01 | 2.98E-01 | 3.01 | 5.25 | 4.77E-02 |
| INMT         | 3.68E-01 | 2.98E-01 | 3.01 | 5.25 | 4.77E-02 |
| CRH          | 3.68E-01 | 2.98E-01 | 3.01 | 5.24 | 4.78E-02 |
| MCMBP        | 3.68E-01 | 2.98E-01 | 3.01 | 5.24 | 4.78E-02 |
| UBE2C        | 3.68E-01 | 2.97E-01 | 3.01 | 5.23 | 4.79E-02 |
| HES2         | 3.68E-01 | 2.97E-01 | 3.01 | 5.23 | 4.80E-02 |
| COX4I1       | 3.67E-01 | 2.97E-01 | 3.01 | 5.23 | 4.80E-02 |
| LPIN2        | 3.67E-01 | 2.97E-01 | 3.01 | 5.23 | 4.80E-02 |
| LOC107986418 | 3.67E-01 | 2.97E-01 | 3.01 | 5.23 | 4.81E-02 |
| LOC105377989 | 3.67E-01 | 2.97E-01 | 3.01 | 5.22 | 4.81E-02 |
| TUBGCP6      | 3.67E-01 | 2.97E-01 | 3.01 | 5.22 | 4.82E-02 |
| C8orf88      | 3.67E-01 | 2.97E-01 | 3.01 | 5.22 | 4.82E-02 |
| SYT10        | 3.67E-01 | 2.97E-01 | 3.01 | 5.22 | 4.82E-02 |
| LOC101926960 | 3.67E-01 | 2.97E-01 | 3.01 | 5.22 | 4.82E-02 |
| LOC105377740 | 3.67E-01 | 2.97E-01 | 3.01 | 5.22 | 4.83E-02 |
| SELP         | 3.67E-01 | 2.97E-01 | 3.01 | 5.22 | 4.83E-02 |
| MANCR        | 3.67E-01 | 2.97E-01 | 3.01 | 5.21 | 4.83E-02 |
| LINC01107    | 3.67E-01 | 2.96E-01 | 3.01 | 5.21 | 4.83E-02 |
| ATP1A2       | 3.67E-01 | 2.96E-01 | 3.01 | 5.21 | 4.83E-02 |
| ABI1         | 3.67E-01 | 2.96E-01 | 3.01 | 5.21 | 4.84E-02 |
| LOC105378468 | 3.67E-01 | 2.96E-01 | 3.01 | 5.21 | 4.84E-02 |
| REPIN1.AS1   | 3.67E-01 | 2.96E-01 | 3.01 | 5.21 | 4.84E-02 |
| MPST         | 3.66E-01 | 2.96E-01 | 3.01 | 5.21 | 4.84E-02 |
| SOCS2        | 3.66E-01 | 2.96E-01 | 3.01 | 5.20 | 4.85E-02 |
| ARMC3        | 3.66E-01 | 2.96E-01 | 3.01 | 5.20 | 4.85E-02 |
| PASD1        | 3.66E-01 | 2.96E-01 | 3.01 | 5.20 | 4.85E-02 |
| PLXNA4       | 3.66E-01 | 2.96E-01 | 3.01 | 5.20 | 4.85E-02 |
| LOC105370847 | 3.66E-01 | 2.96E-01 | 3.01 | 5.20 | 4.85E-02 |
| BACH1.IT3    | 3.66E-01 | 2.96E-01 | 3.01 | 5.20 | 4.86E-02 |
| LOC105376558 | 3.66E-01 | 2.96E-01 | 3.01 | 5.20 | 4.86E-02 |
| SHD          | 3.66E-01 | 2.96E-01 | 3.01 | 5.20 | 4.86E-02 |
| OR52E8       | 3.66E-01 | 2.95E-01 | 3.01 | 5.19 | 4.87E-02 |
| LOC107986492 | 3.66E-01 | 2.95E-01 | 3.01 | 5.19 | 4.87E-02 |
| LOC107987110 | 3.66E-01 | 2.95E-01 | 3.01 | 5.19 | 4.87E-02 |
| SHC4         | 3.66E-01 | 2.95E-01 | 3.01 | 5.19 | 4.88E-02 |
| TRBV6.9      | 3.65E-01 | 2.95E-01 | 3.01 | 5.18 | 4.88E-02 |
| LOC105370513 | 3.65E-01 | 2.95E-01 | 3.01 | 5.18 | 4.89E-02 |
| PABPC5       | 3.65E-01 | 2.95E-01 | 3.01 | 5.18 | 4.89E-02 |

|              |          |          |      |      |          |
|--------------|----------|----------|------|------|----------|
| LOC105379283 | 3.65E-01 | 2.95E-01 | 3.01 | 5.18 | 4.89E-02 |
| LOC107987249 | 3.65E-01 | 2.95E-01 | 3.01 | 5.18 | 4.89E-02 |
| C1orf185     | 3.65E-01 | 2.94E-01 | 3.02 | 5.17 | 4.91E-02 |
| TRPV3        | 3.65E-01 | 2.94E-01 | 3.02 | 5.16 | 4.92E-02 |
| LOC105375001 | 3.64E-01 | 2.94E-01 | 3.02 | 5.16 | 4.92E-02 |
| LOC107986896 | 3.64E-01 | 2.94E-01 | 3.02 | 5.16 | 4.93E-02 |
| LINC00260    | 3.64E-01 | 2.94E-01 | 3.02 | 5.16 | 4.93E-02 |
| ADAM7        | 3.64E-01 | 2.94E-01 | 3.02 | 5.15 | 4.93E-02 |
| GSTA2        | 3.64E-01 | 2.93E-01 | 3.02 | 5.15 | 4.93E-02 |
| CHRNA4       | 3.64E-01 | 2.93E-01 | 3.02 | 5.15 | 4.94E-02 |
| MFSD9        | 3.64E-01 | 2.93E-01 | 3.02 | 5.15 | 4.94E-02 |
| OR2B6        | 3.64E-01 | 2.93E-01 | 3.02 | 5.15 | 4.95E-02 |
| FOXE3        | 3.64E-01 | 2.93E-01 | 3.02 | 5.15 | 4.95E-02 |
| LOC102724214 | 3.64E-01 | 2.93E-01 | 3.02 | 5.14 | 4.95E-02 |
| LINC00354    | 3.64E-01 | 2.93E-01 | 3.02 | 5.14 | 4.96E-02 |
| LOC100506405 | 3.63E-01 | 2.93E-01 | 3.02 | 5.14 | 4.96E-02 |
| MIR5698      | 3.63E-01 | 2.93E-01 | 3.02 | 5.14 | 4.97E-02 |
| FZD7         | 3.63E-01 | 2.92E-01 | 3.02 | 5.13 | 4.97E-02 |
| TMEM67       | 3.63E-01 | 2.92E-01 | 3.02 | 5.13 | 4.97E-02 |
| LOC105373830 | 3.63E-01 | 2.92E-01 | 3.02 | 5.13 | 4.97E-02 |
| IGLVVI.25.1  | 3.63E-01 | 2.92E-01 | 3.02 | 5.13 | 4.98E-02 |
| DHX57        | 3.63E-01 | 2.92E-01 | 3.02 | 5.13 | 4.98E-02 |
| LOC107986169 | 3.63E-01 | 2.92E-01 | 3.02 | 5.13 | 4.99E-02 |
| CA2          | 3.63E-01 | 2.92E-01 | 3.02 | 5.12 | 4.99E-02 |
| FAM156A      | 3.63E-01 | 2.92E-01 | 3.02 | 5.12 | 4.99E-02 |
| FAXDC2       | 3.63E-01 | 2.92E-01 | 3.02 | 5.12 | 4.99E-02 |
| LOC107986277 | 3.63E-01 | 2.92E-01 | 3.02 | 5.12 | 5.00E-02 |
| HOXB.AS1     | 3.63E-01 | 2.92E-01 | 3.02 | 5.12 | 5.00E-02 |
| LOC107986285 | 3.63E-01 | 2.92E-01 | 3.02 | 5.12 | 5.00E-02 |
