# Supplementary material for: RNA Sequencing of Intestinal Enterocytes Pre- and Post-Roux-en-Y Gastric Bypass Reveals Alteration in Gene Expression Related to Enterocyte Differentiation, Restitution, and Obesity with Regulation by Schlafen 12
Source: MDPI journal article supplement (doi:10.3390/cells11203283), 2022-10-18
Supplement: s1 [file s1]

| Genes        | mean in<br>group | mean in<br>group Pre | Mean_diff.P<br>ostVsPre | FC    | pval     |
|--------------|------------------|----------------------|-------------------------|-------|----------|
| STXBP4       | 12.04            | 4.49                 | 7.54                    | 2.68  | 8.46E-04 |
| LOC105375670 | 15.57            | 6.59                 | 8.98                    | 2.36  | 1.15E-03 |
| TRPC5        | 2.79             | 6.89                 | -4.10                   | 0.40  | 1.24E-03 |
| SPARCL1      | 18.81            | 6.21                 | 12.60                   | 3.03  | 1.30E-03 |
| LOC105378841 | 8.60             | 2.66                 | 5.93                    | 3.23  | 1.35E-03 |
| SLC19A2      | 12.83            | 4.97                 | 7.86                    | 2.58  | 1.75E-03 |
| UTS2         | 16.04            | 4.90                 | 11.13                   | 3.27  | 2.00E-03 |
| CES1P1       | 4.79             | 1.05                 | 3.74                    | 4.55  | 2.19E-03 |
| LOC105372092 | 5.96             | 1.89                 | 4.07                    | 3.16  | 2.21E-03 |
| LOC101928978 | 10.75            | 4.35                 | 6.39                    | 2.47  | 2.22E-03 |
| WDR37        | 8.06             | 4.51                 | 3.55                    | 1.79  | 2.23E-03 |
| NABP1.OT1    | 10.33            | 1.01                 | 9.33                    | 10.26 | 2.39E-03 |
| CNN1         | 9.51             | 0.97                 | 8.54                    | 9.81  | 2.41E-03 |
| ERICH4       | 11.52            | 3.56                 | 7.96                    | 3.23  | 2.44E-03 |
| AHSA1        | 10.17            | 2.55                 | 7.62                    | 3.99  | 2.44E-03 |
| XPO7         | 12.97            | 4.09                 | 8.87                    | 3.17  | 2.47E-03 |
| ZNF397       | 3.89             | 1.22                 | 2.67                    | 3.19  | 2.47E-03 |
| LOC389705    | 16.92            | 3.12                 | 13.80                   | 5.42  | 2.54E-03 |
| PLEKHG4      | 6.35             | 2.89                 | 3.46                    | 2.20  | 2.91E-03 |
| LINC00678    | 9.26             | 3.33                 | 5.93                    | 2.78  | 3.08E-03 |
| LOC107984098 | 20.06            | 1.84                 | 18.22                   | 10.88 | 3.13E-03 |
| AKAP13       | 6.10             | 10.56                | -4.46                   | 0.58  | 3.21E-03 |
| LOC105377963 | 11.50            | 1.33                 | 10.17                   | 8.66  | 3.24E-03 |
| LOC105372725 | 7.53             | 2.38                 | 5.15                    | 3.17  | 3.32E-03 |
| PTPRF        | 11.30            | 4.54                 | 6.76                    | 2.49  | 3.37E-03 |
| CPNE3        | 5.52             | 14.64                | -9.11                   | 0.38  | 3.38E-03 |
| ZNF417       | 7.33             | 3.54                 | 3.78                    | 2.07  | 3.49E-03 |
| KLHL6        | 6.57             | 2.67                 | 3.90                    | 2.46  | 3.53E-03 |
| TRNT1        | 6.88             | 3.42                 | 3.47                    | 2.02  | 3.58E-03 |
| LOC105371155 | 12.43            | 1.62                 | 10.81                   | 7.69  | 3.98E-03 |
| LINC00466    | 13.95            | 6.83                 | 7.11                    | 2.04  | 4.10E-03 |
| TCTN3        | 3.99             | 17.39                | -13.39                  | 0.23  | 4.15E-03 |
| C2CD4A       | 7.54             | 1.31                 | 6.23                    | 5.74  | 4.25E-03 |
| EFCC1        | 5.80             | 2.12                 | 3.68                    | 2.73  | 4.32E-03 |
| VPS13D       | 13.32            | 6.28                 | 7.05                    | 2.12  | 4.35E-03 |
| PATJ         | 19.98            | 11.84                | 8.14                    | 1.69  | 4.39E-03 |
| LOC105378748 | 4.64             | 14.39                | -9.74                   | 0.32  | 4.40E-03 |
| LOC105377927 | 11.87            | 1.34                 | 10.53                   | 8.84  | 4.52E-03 |
| TUB          | 6.18             | 3.79                 | 2.40                    | 1.63  | 4.54E-03 |
| EGFEM1P      | 11.71            | 6.05                 | 5.66                    | 1.94  | 4.59E-03 |
| SLC26A6      | 10.11            | 0.72                 | 9.39                    | 14.07 | 4.62E-03 |
| LINC01426    | 5.82             | 1.67                 | 4.15                    | 3.49  | 4.62E-03 |
| ABLIM2       | 9.07             | 3.11                 | 5.96                    | 2.92  | 4.65E-03 |
| GSN          | 7.92             | 4.15                 | 3.77                    | 1.91  | 4.68E-03 |
| POFUT1       | 7.31             | 1.98                 | 5.33                    | 3.70  | 4.76E-03 |

|              |       |       |        |       |          |
|--------------|-------|-------|--------|-------|----------|
| LOC105379179 | 7.83  | 2.32  | 5.50   | 3.37  | 5.14E-03 |
| ACOX3        | 8.91  | 2.02  | 6.88   | 4.40  | 5.16E-03 |
| LOC440700    | 7.87  | 0.25  | 7.62   | 32.11 | 5.16E-03 |
| LOC105379130 | 12.87 | 3.84  | 9.04   | 3.36  | 5.19E-03 |
| LINC02669    | 9.64  | 1.94  | 7.69   | 4.96  | 5.22E-03 |
| LOC107984880 | 8.94  | 1.22  | 7.72   | 7.34  | 5.23E-03 |
| LINC01607    | 17.46 | 4.69  | 12.76  | 3.72  | 5.30E-03 |
| LOC105376755 | 17.18 | 3.84  | 13.34  | 4.47  | 5.35E-03 |
| BBS7         | 14.16 | 5.72  | 8.44   | 2.47  | 5.43E-03 |
| LOC105375938 | 15.28 | 3.49  | 11.79  | 4.38  | 5.52E-03 |
| SLC5A7       | 7.19  | 4.17  | 3.03   | 1.73  | 5.54E-03 |
| LINC02774    | 16.16 | 5.78  | 10.38  | 2.79  | 5.81E-03 |
| LOC105375749 | 9.18  | 2.43  | 6.75   | 3.78  | 6.02E-03 |
| CFC1         | 3.35  | 0.97  | 2.38   | 3.46  | 6.02E-03 |
| LOC105372877 | 9.91  | 2.92  | 6.99   | 3.39  | 6.27E-03 |
| LOC285422    | 15.00 | 0.76  | 14.24  | 19.79 | 6.27E-03 |
| DEF6         | 16.07 | 3.29  | 12.78  | 4.89  | 6.29E-03 |
| MIATNB       | 8.38  | 1.32  | 7.06   | 6.35  | 6.39E-03 |
| LOC105369890 | 12.28 | 6.96  | 5.32   | 1.76  | 6.42E-03 |
| LOC107986617 | 9.55  | 2.12  | 7.43   | 4.51  | 6.53E-03 |
| LOC105378128 | 10.78 | 2.00  | 8.78   | 5.39  | 6.59E-03 |
| HIGD2B       | 7.15  | 1.82  | 5.33   | 3.93  | 6.60E-03 |
| SLC35A3      | 8.65  | 4.92  | 3.73   | 1.76  | 6.61E-03 |
| TAS2R1       | 10.88 | 3.30  | 7.58   | 3.30  | 6.64E-03 |
| LOC112268086 | 8.95  | 3.48  | 5.46   | 2.57  | 6.70E-03 |
| LOC339902    | 3.48  | 23.43 | -19.94 | 0.15  | 6.74E-03 |
| LOC112268467 | 5.41  | 2.54  | 2.88   | 2.13  | 6.78E-03 |
| HES2         | 5.20  | 1.75  | 3.45   | 2.97  | 7.00E-03 |
| CALB1        | 14.53 | 5.94  | 8.59   | 2.45  | 7.11E-03 |
| DCTN1.AS1    | 9.00  | 3.98  | 5.02   | 2.26  | 7.21E-03 |
| LPXN         | 12.28 | 5.04  | 7.24   | 2.44  | 7.23E-03 |
| TMEM37       | 2.73  | 13.80 | -11.07 | 0.20  | 7.33E-03 |
| TMEM245      | 11.24 | 4.11  | 7.14   | 2.74  | 7.45E-03 |
| LOC105376085 | 18.00 | 7.98  | 10.01  | 2.25  | 7.45E-03 |
| LOC101927267 | 2.03  | 9.00  | -6.97  | 0.23  | 7.49E-03 |
| GALNT10      | 3.84  | 10.19 | -6.34  | 0.38  | 7.56E-03 |
| LOC105376817 | 18.92 | 3.40  | 15.52  | 5.57  | 7.64E-03 |
| LOC101926960 | 8.95  | 1.17  | 7.78   | 7.65  | 7.65E-03 |
| CNTNAP1      | 11.83 | 5.40  | 6.44   | 2.19  | 7.90E-03 |
| G6PC         | 7.70  | 2.42  | 5.28   | 3.18  | 7.92E-03 |
| NUDT19       | 5.23  | 12.82 | -7.59  | 0.41  | 7.93E-03 |
| NSRP1        | 7.43  | 15.50 | -8.07  | 0.48  | 7.94E-03 |
| SH3TC2       | 8.28  | 4.65  | 3.63   | 1.78  | 8.11E-03 |
| REV1         | 11.00 | 4.00  | 7.00   | 2.75  | 8.13E-03 |
| CDC45        | 13.55 | 4.86  | 8.68   | 2.79  | 8.20E-03 |
| LOC105377562 | 16.37 | 2.97  | 13.41  | 5.52  | 8.23E-03 |
| LOC112267972 | 13.32 | 3.77  | 9.55   | 3.54  | 8.30E-03 |

|              |       |       |        |       |          |
|--------------|-------|-------|--------|-------|----------|
| SPIB         | 8.08  | 1.70  | 6.38   | 4.75  | 8.30E-03 |
| PRG4         | 14.47 | 6.13  | 8.34   | 2.36  | 8.37E-03 |
| UTP11        | 9.37  | 2.93  | 6.44   | 3.20  | 8.51E-03 |
| CNOT6L       | 12.21 | 7.72  | 4.50   | 1.58  | 8.64E-03 |
| TLK2         | 12.48 | 6.27  | 6.21   | 1.99  | 8.79E-03 |
| BRK1         | 7.75  | 1.79  | 5.96   | 4.34  | 8.81E-03 |
| NSL1         | 11.20 | 5.07  | 6.13   | 2.21  | 8.86E-03 |
| HLTF         | 16.59 | 5.56  | 11.03  | 2.99  | 8.87E-03 |
| LOC105374594 | 18.22 | 4.94  | 13.27  | 3.69  | 8.87E-03 |
| CENPO        | 7.83  | 2.14  | 5.69   | 3.66  | 8.89E-03 |
| LOC107985241 | 9.22  | 2.32  | 6.90   | 3.97  | 8.93E-03 |
| LOC101929650 | 4.80  | 1.29  | 3.51   | 3.73  | 9.09E-03 |
| CREM         | 14.85 | 6.79  | 8.06   | 2.19  | 9.24E-03 |
| LOC105378403 | 1.50  | 16.57 | -15.06 | 0.09  | 9.32E-03 |
| CACNA2D1.AS1 | 4.75  | 10.82 | -6.07  | 0.44  | 9.43E-03 |
| LINC00548    | 7.52  | 2.13  | 5.39   | 3.53  | 9.52E-03 |
| LOC107985379 | 10.07 | 0.72  | 9.36   | 14.08 | 9.58E-03 |
| SLC13A2      | 5.78  | 16.98 | -11.20 | 0.34  | 9.67E-03 |
| HSPH1        | 16.41 | 6.50  | 9.91   | 2.52  | 9.69E-03 |
| LINC02542    | 14.92 | 5.03  | 9.89   | 2.97  | 9.73E-03 |
| LOC107985037 | 6.21  | 14.66 | -8.44  | 0.42  | 9.83E-03 |
| LOC107986223 | 36.91 | 8.26  | 28.64  | 4.47  | 9.84E-03 |
| LINC02128    | 8.61  | 0.57  | 8.04   | 15.04 | 9.89E-03 |
| AP1S3        | 10.99 | 4.17  | 6.82   | 2.63  | 9.91E-03 |
| LRFN1        | 7.66  | 1.26  | 6.40   | 6.06  | 9.94E-03 |
| LMBRD1       | 8.16  | 15.55 | -7.38  | 0.53  | 9.95E-03 |
| DTWD2        | 11.02 | 5.82  | 5.20   | 1.89  | 9.97E-03 |
| NUMB         | 12.28 | 4.54  | 7.74   | 2.71  | 1.00E-02 |
| SPAG8        | 11.96 | 2.12  | 9.84   | 5.64  | 1.00E-02 |
| WDR7         | 13.44 | 7.39  | 6.05   | 1.82  | 1.01E-02 |
| LOC107986708 | 10.19 | 2.13  | 8.05   | 4.77  | 1.01E-02 |
| DNAJA2       | 15.35 | 5.31  | 10.04  | 2.89  | 1.01E-02 |
| NALCN.AS1    | 7.28  | 0.76  | 6.51   | 9.52  | 1.02E-02 |
| COL5A2       | 20.82 | 9.76  | 11.05  | 2.13  | 1.03E-02 |
| SLC4A8       | 9.22  | 6.47  | 2.75   | 1.43  | 1.03E-02 |
| MEMO1        | 10.10 | 3.75  | 6.35   | 2.69  | 1.04E-02 |
| COL22A1      | 14.84 | 5.26  | 9.59   | 2.82  | 1.05E-02 |
| RPAP2        | 9.56  | 6.19  | 3.37   | 1.54  | 1.05E-02 |
| CENPE        | 18.81 | 9.33  | 9.49   | 2.02  | 1.06E-02 |
| LOC107984023 | 10.08 | 4.08  | 5.99   | 2.47  | 1.06E-02 |
| PRSS55       | 0.42  | 4.30  | -3.89  | 0.10  | 1.06E-02 |
| EXOC5        | 11.83 | 7.05  | 4.78   | 1.68  | 1.07E-02 |
| C3orf33      | 15.47 | 3.82  | 11.65  | 4.05  | 1.08E-02 |
| RP9P         | 5.15  | 1.09  | 4.06   | 4.73  | 1.09E-02 |
| ZNF740       | 3.12  | 7.32  | -4.20  | 0.43  | 1.09E-02 |
| ONECUT3      | 2.55  | 0.99  | 1.55   | 2.56  | 1.09E-02 |
| LOC107985967 | 9.84  | 3.47  | 6.38   | 2.84  | 1.10E-02 |

|              |       |       |       |       |          |
|--------------|-------|-------|-------|-------|----------|
| PTPRG        | 7.38  | 12.76 | -5.38 | 0.58  | 1.10E-02 |
| LOC105369990 | 7.31  | 2.18  | 5.13  | 3.35  | 1.10E-02 |
| RIPPLY2      | 3.29  | 0.39  | 2.91  | 8.52  | 1.11E-02 |
| LOC107986367 | 11.08 | 4.06  | 7.02  | 2.73  | 1.12E-02 |
| MIR3150BHG   | 8.39  | 4.08  | 4.31  | 2.06  | 1.13E-02 |
| LOC105374959 | 14.59 | 2.73  | 11.85 | 5.34  | 1.14E-02 |
| UVRAG.DT     | 6.29  | 1.12  | 5.17  | 5.60  | 1.15E-02 |
| LOC105370175 | 6.28  | 1.25  | 5.03  | 5.02  | 1.15E-02 |
| RNF157.AS1   | 4.91  | 0.97  | 3.94  | 5.08  | 1.15E-02 |
| NR1H2        | 12.98 | 1.57  | 11.42 | 8.28  | 1.15E-02 |
| PANX1        | 7.69  | 3.84  | 3.85  | 2.00  | 1.15E-02 |
| LOC105374038 | 17.08 | 8.09  | 8.99  | 2.11  | 1.15E-02 |
| PGAP1        | 11.94 | 7.00  | 4.94  | 1.71  | 1.16E-02 |
| OR56B1       | 5.44  | 1.70  | 3.74  | 3.21  | 1.17E-02 |
| GPN3         | 16.62 | 2.88  | 13.74 | 5.77  | 1.17E-02 |
| LINC02020    | 18.68 | 2.12  | 16.55 | 8.79  | 1.19E-02 |
| BAIAP2L2     | 6.52  | 2.66  | 3.86  | 2.45  | 1.19E-02 |
| AUH          | 12.35 | 4.83  | 7.52  | 2.56  | 1.20E-02 |
| EN2          | 4.95  | 13.20 | -8.25 | 0.38  | 1.21E-02 |
| DYRK4        | 4.18  | 9.21  | -5.04 | 0.45  | 1.21E-02 |
| LOC107984173 | 12.57 | 0.70  | 11.87 | 17.92 | 1.22E-02 |
| CSMD2.AS1    | 15.25 | 2.68  | 12.57 | 5.70  | 1.22E-02 |
| LPO          | 11.66 | 4.11  | 7.55  | 2.84  | 1.24E-02 |
| PFDN4        | 9.99  | 3.65  | 6.34  | 2.74  | 1.25E-02 |
| SGO2         | 11.82 | 6.32  | 5.51  | 1.87  | 1.26E-02 |
| LOC107985188 | 7.00  | 0.41  | 6.59  | 16.96 | 1.27E-02 |
| LINC02140    | 5.91  | 1.13  | 4.78  | 5.23  | 1.27E-02 |
| LOC105376626 | 4.46  | 11.05 | -6.59 | 0.40  | 1.27E-02 |
| OTUD6B.AS1   | 11.23 | 4.38  | 6.84  | 2.56  | 1.27E-02 |
| SNU13        | 6.07  | 1.71  | 4.36  | 3.55  | 1.29E-02 |
| FBXW7        | 8.25  | 4.90  | 3.35  | 1.68  | 1.29E-02 |
| SLCO2B1      | 8.70  | 1.96  | 6.73  | 4.43  | 1.29E-02 |
| ATP13A4.AS1  | 10.25 | 3.62  | 6.63  | 2.83  | 1.30E-02 |
| LOC100505851 | 10.11 | 2.45  | 7.66  | 4.12  | 1.30E-02 |
| GOLGA6L9_1   | 0.84  | 0.03  | 0.82  | 32.12 | 1.30E-02 |
| WDR1         | 9.33  | 2.37  | 6.96  | 3.93  | 1.30E-02 |
| SLC4A5       | 10.03 | 5.23  | 4.80  | 1.92  | 1.31E-02 |
| C1orf116     | 4.23  | 1.45  | 2.78  | 2.92  | 1.31E-02 |
| TNS2         | 8.51  | 2.63  | 5.87  | 3.23  | 1.32E-02 |
| S100A7A      | 9.27  | 2.19  | 7.08  | 4.24  | 1.32E-02 |
| LOC105373831 | 11.18 | 4.10  | 7.07  | 2.72  | 1.32E-02 |
| LOC105371899 | 9.32  | 0.50  | 8.82  | 18.57 | 1.32E-02 |
| LOC107986119 | 8.97  | 1.63  | 7.34  | 5.50  | 1.33E-02 |
| LOC105373234 | 8.81  | 4.98  | 3.83  | 1.77  | 1.34E-02 |
| LINC00934    | 5.52  | 1.52  | 3.99  | 3.62  | 1.34E-02 |
| PLAA         | 8.42  | 3.51  | 4.90  | 2.40  | 1.34E-02 |
| DHRS7C       | 3.06  | 0.22  | 2.84  | 13.76 | 1.35E-02 |

|              |       |       |        |       |          |
|--------------|-------|-------|--------|-------|----------|
| TMEM131      | 18.54 | 7.96  | 10.58  | 2.33  | 1.35E-02 |
| RPL23AP7     | 10.38 | 0.73  | 9.66   | 14.29 | 1.35E-02 |
| MFAP5        | 17.62 | 5.45  | 12.17  | 3.23  | 1.36E-02 |
| NCAPG2       | 9.15  | 17.33 | -8.18  | 0.53  | 1.36E-02 |
| TANC1        | 11.40 | 5.54  | 5.86   | 2.06  | 1.37E-02 |
| CSH1         | 14.64 | 3.53  | 11.11  | 4.15  | 1.37E-02 |
| HRK          | 4.19  | 8.04  | -3.85  | 0.52  | 1.37E-02 |
| ACO2         | 8.88  | 3.93  | 4.95   | 2.26  | 1.37E-02 |
| LOC613266    | 4.03  | 12.27 | -8.25  | 0.33  | 1.38E-02 |
| LOC105371951 | 11.85 | 1.74  | 10.10  | 6.79  | 1.38E-02 |
| LOC284379    | 11.16 | 3.20  | 7.96   | 3.48  | 1.39E-02 |
| LOC107985256 | 7.73  | 2.45  | 5.28   | 3.15  | 1.39E-02 |
| LINC01205    | 6.68  | 15.86 | -9.18  | 0.42  | 1.39E-02 |
| ATP11A       | 11.27 | 6.55  | 4.72   | 1.72  | 1.40E-02 |
| LOC101927947 | 6.58  | 2.02  | 4.57   | 3.26  | 1.40E-02 |
| LOC105373973 | 7.95  | 2.40  | 5.55   | 3.31  | 1.41E-02 |
| POLD2        | 8.47  | 2.03  | 6.44   | 4.17  | 1.41E-02 |
| LOC105371873 | 11.41 | 4.43  | 6.98   | 2.58  | 1.43E-02 |
| TMEM147.AS1  | 5.13  | 0.85  | 4.27   | 6.00  | 1.44E-02 |
| SLC26A9.AS1  | 2.35  | 0.28  | 2.07   | 8.41  | 1.44E-02 |
| BICDL1       | 4.46  | 10.67 | -6.21  | 0.42  | 1.44E-02 |
| LINC01497    | 9.64  | 3.46  | 6.18   | 2.79  | 1.44E-02 |
| LOC107984302 | 5.27  | 1.14  | 4.13   | 4.61  | 1.44E-02 |
| TEX13C       | 2.54  | 8.21  | -5.67  | 0.31  | 1.44E-02 |
| CCDC127      | 6.18  | 2.69  | 3.49   | 2.30  | 1.45E-02 |
| LOC100996574 | 7.19  | 0.73  | 6.46   | 9.83  | 1.46E-02 |
| GUCY1B1      | 12.13 | 5.22  | 6.90   | 2.32  | 1.47E-02 |
| FLRT1        | 2.71  | 5.54  | -2.83  | 0.49  | 1.47E-02 |
| MEOX1        | 8.06  | 0.88  | 7.18   | 9.16  | 1.47E-02 |
| FOCAD        | 16.57 | 8.60  | 7.97   | 1.93  | 1.49E-02 |
| DSC1         | 16.49 | 7.73  | 8.76   | 2.13  | 1.49E-02 |
| OR52B4       | 7.52  | 2.00  | 5.52   | 3.76  | 1.49E-02 |
| LOC102723536 | 13.37 | 2.38  | 10.99  | 5.63  | 1.51E-02 |
| LOC107985584 | 3.25  | 0.00  | 3.25   | 3.25  | 1.51E-02 |
| NDST1        | 4.81  | 2.05  | 2.76   | 2.35  | 1.53E-02 |
| LOC105375046 | 9.97  | 1.68  | 8.29   | 5.93  | 1.54E-02 |
| LOC105378464 | 34.89 | 8.18  | 26.71  | 4.26  | 1.54E-02 |
| LOC105370538 | 14.25 | 4.31  | 9.93   | 3.30  | 1.56E-02 |
| IGLON5       | 9.63  | 5.13  | 4.50   | 1.88  | 1.56E-02 |
| PLK1         | 10.95 | 2.49  | 8.46   | 4.39  | 1.56E-02 |
| C11orf53     | 14.19 | 4.44  | 9.75   | 3.20  | 1.56E-02 |
| LOC105376357 | 17.21 | 0.00  | 17.21  | 17.21 | 1.57E-02 |
| HSPA13       | 9.03  | 3.78  | 5.25   | 2.39  | 1.57E-02 |
| PHACTR4      | 11.42 | 4.89  | 6.53   | 2.33  | 1.57E-02 |
| NXPE2        | 8.89  | 5.56  | 3.33   | 1.60  | 1.59E-02 |
| PEX3         | 12.34 | 5.31  | 7.03   | 2.32  | 1.59E-02 |
| FAM242B      | 1.40  | 15.58 | -14.18 | 0.09  | 1.59E-02 |

|              |       |       |        |       |          |
|--------------|-------|-------|--------|-------|----------|
| MANBAL       | 4.21  | 15.34 | -11.13 | 0.27  | 1.59E-02 |
| LOC105374981 | 4.99  | 15.66 | -10.68 | 0.32  | 1.60E-02 |
| LOC105374217 | 24.84 | 4.63  | 20.21  | 5.37  | 1.61E-02 |
| LOC107986813 | 4.65  | 11.50 | -6.85  | 0.40  | 1.61E-02 |
| AAGAB        | 21.19 | 5.75  | 15.44  | 3.69  | 1.61E-02 |
| LOC105370304 | 13.23 | 4.53  | 8.70   | 2.92  | 1.61E-02 |
| CCDC190      | 9.28  | 4.69  | 4.60   | 1.98  | 1.61E-02 |
| LOC107985541 | 2.60  | 7.67  | -5.06  | 0.34  | 1.62E-02 |
| TRAPPC12     | 0.97  | 0.12  | 0.85   | 8.22  | 1.62E-02 |
| LINC01359    | 27.30 | 8.06  | 19.24  | 3.39  | 1.63E-02 |
| NOA1         | 8.90  | 2.79  | 6.11   | 3.19  | 1.63E-02 |
| LOC105371822 | 5.81  | 3.31  | 2.51   | 1.76  | 1.65E-02 |
| PHIP         | 11.32 | 5.85  | 5.47   | 1.93  | 1.65E-02 |
| AQP12B       | 3.31  | 0.13  | 3.18   | 25.72 | 1.65E-02 |
| ERO1B        | 8.55  | 5.37  | 3.18   | 1.59  | 1.66E-02 |
| NFKBIZ       | 9.55  | 3.58  | 5.96   | 2.66  | 1.66E-02 |
| MBD3         | 6.69  | 1.86  | 4.83   | 3.60  | 1.66E-02 |
| CKM          | 5.36  | 1.68  | 3.68   | 3.19  | 1.66E-02 |
| LOC107986260 | 4.45  | 0.88  | 3.58   | 5.07  | 1.67E-02 |
| GRK4         | 9.73  | 4.74  | 5.00   | 2.06  | 1.67E-02 |
| TBC1D15      | 17.80 | 10.83 | 6.97   | 1.64  | 1.67E-02 |
| DENND4B      | 8.83  | 3.63  | 5.20   | 2.43  | 1.67E-02 |
| TCF7L1.IT1   | 15.70 | 1.05  | 14.65  | 14.97 | 1.68E-02 |
| LOC158434    | 14.64 | 2.65  | 12.00  | 5.53  | 1.68E-02 |
| PTCSC2       | 17.72 | 4.11  | 13.60  | 4.31  | 1.69E-02 |
| LOC105379134 | 51.89 | 4.87  | 47.01  | 10.65 | 1.70E-02 |
| LOC105372518 | 17.37 | 3.07  | 14.31  | 5.67  | 1.70E-02 |
| NETO1        | 11.22 | 4.76  | 6.45   | 2.36  | 1.71E-02 |
| R3HCC1       | 1.38  | 9.22  | -7.84  | 0.15  | 1.71E-02 |
| FLYWCH1      | 7.74  | 4.11  | 3.63   | 1.88  | 1.72E-02 |
| DEPDC4       | 11.94 | 5.50  | 6.45   | 2.17  | 1.72E-02 |
| MRPS6        | 4.57  | 0.10  | 4.47   | 44.29 | 1.72E-02 |
| TTC38        | 7.25  | 4.06  | 3.19   | 1.78  | 1.73E-02 |
| LOC105371449 | 6.06  | 3.15  | 2.91   | 1.92  | 1.73E-02 |
| D21S2088E    | 4.76  | 26.18 | -21.42 | 0.18  | 1.73E-02 |
| FGF10        | 7.97  | 4.83  | 3.15   | 1.65  | 1.74E-02 |
| LOC105374475 | 12.33 | 6.97  | 5.37   | 1.77  | 1.74E-02 |
| BMPR1B.DT    | 21.37 | 2.89  | 18.47  | 7.38  | 1.74E-02 |
| LOC101929498 | 15.16 | 6.80  | 8.36   | 2.23  | 1.75E-02 |
| FAM218A      | 9.71  | 3.72  | 5.99   | 2.61  | 1.76E-02 |
| DPH3         | 11.60 | 4.50  | 7.09   | 2.57  | 1.76E-02 |
| DARS1.AS1    | 5.42  | 0.43  | 4.99   | 12.70 | 1.76E-02 |
| LOC105371414 | 6.65  | 0.49  | 6.16   | 13.64 | 1.77E-02 |
| MRPL51       | 10.48 | 2.16  | 8.32   | 4.86  | 1.77E-02 |
| LOC105379065 | 12.82 | 5.25  | 7.57   | 2.44  | 1.78E-02 |
| LOC107983961 | 8.86  | 1.27  | 7.58   | 6.95  | 1.79E-02 |
| LOC105370518 | 6.88  | 4.70  | 2.17   | 1.46  | 1.79E-02 |

|              |       |       |        |       |          |
|--------------|-------|-------|--------|-------|----------|
| RASAL2       | 8.91  | 5.60  | 3.31   | 1.59  | 1.79E-02 |
| SDHB         | 11.13 | 2.86  | 8.26   | 3.88  | 1.82E-02 |
| LOC107986031 | 7.12  | 1.65  | 5.47   | 4.31  | 1.82E-02 |
| PSMG4        | 8.65  | 4.61  | 4.05   | 1.88  | 1.82E-02 |
| LOC105369709 | 8.09  | 2.16  | 5.94   | 3.75  | 1.83E-02 |
| LOC112267894 | 21.61 | 2.32  | 19.29  | 9.30  | 1.83E-02 |
| OR1L8        | 11.38 | 4.13  | 7.25   | 2.75  | 1.83E-02 |
| ITM2B        | 9.72  | 5.04  | 4.68   | 1.93  | 1.84E-02 |
| LOC105373989 | 2.78  | 0.00  | 2.78   | 2.78  | 1.85E-02 |
| PPM1B        | 13.00 | 4.99  | 8.01   | 2.60  | 1.85E-02 |
| ERFE         | 3.19  | 0.41  | 2.78   | 7.70  | 1.86E-02 |
| LOC105372480 | 16.34 | 2.47  | 13.87  | 6.61  | 1.86E-02 |
| SAMD15       | 11.78 | 7.12  | 4.66   | 1.65  | 1.86E-02 |
| NFE2L3       | 11.93 | 3.84  | 8.09   | 3.11  | 1.86E-02 |
| LOC107986962 | 9.62  | 1.77  | 7.85   | 5.44  | 1.88E-02 |
| MADCAM1      | 0.35  | 2.92  | -2.57  | 0.12  | 1.89E-02 |
| LOC105376287 | 5.47  | 1.60  | 3.87   | 3.42  | 1.89E-02 |
| LOC112267935 | 4.69  | 1.60  | 3.09   | 2.94  | 1.90E-02 |
| LOC105376205 | 4.84  | 12.16 | -7.32  | 0.40  | 1.91E-02 |
| ZNF671       | 3.40  | 10.01 | -6.61  | 0.34  | 1.91E-02 |
| STARD3       | 2.52  | 6.33  | -3.81  | 0.40  | 1.92E-02 |
| LOC284412    | 2.33  | 14.57 | -12.24 | 0.16  | 1.92E-02 |
| MYO6         | 16.31 | 6.92  | 9.39   | 2.36  | 1.92E-02 |
| CPO          | 8.37  | 4.38  | 4.00   | 1.91  | 1.93E-02 |
| STN1         | 5.63  | 13.80 | -8.17  | 0.41  | 1.94E-02 |
| LSM5         | 16.96 | 8.23  | 8.73   | 2.06  | 1.94E-02 |
| TSPY26P      | 3.20  | 0.08  | 3.12   | 40.46 | 1.94E-02 |
| ASB10        | 8.00  | 1.31  | 6.70   | 6.13  | 1.95E-02 |
| LOC100131532 | 8.30  | 3.07  | 5.23   | 2.70  | 1.95E-02 |
| LOC105378029 | 11.22 | 4.02  | 7.20   | 2.79  | 1.95E-02 |
| LOC105377152 | 4.58  | 16.92 | -12.34 | 0.27  | 1.96E-02 |
| KLHL11       | 9.10  | 3.77  | 5.33   | 2.41  | 1.96E-02 |
| LINC01833    | 3.27  | 8.60  | -5.33  | 0.38  | 1.96E-02 |
| LOC100996598 | 16.84 | 1.54  | 15.30  | 10.93 | 1.97E-02 |
| RPS6KA4      | 2.95  | 8.85  | -5.89  | 0.33  | 1.97E-02 |
| LOC107986514 | 7.46  | 2.28  | 5.19   | 3.28  | 1.99E-02 |
| MRGPRF.AS1   | 11.23 | 2.38  | 8.85   | 4.72  | 2.00E-02 |
| LINC02286    | 11.50 | 5.96  | 5.54   | 1.93  | 2.01E-02 |
| SRSF9        | 2.87  | 0.33  | 2.54   | 8.61  | 2.02E-02 |
| STAM.AS1     | 9.49  | 2.25  | 7.25   | 4.23  | 2.02E-02 |
| FAIM2        | 3.03  | 0.86  | 2.18   | 3.54  | 2.03E-02 |
| LOC107986953 | 18.69 | 1.58  | 17.11  | 11.80 | 2.03E-02 |
| KIAA1522     | 10.55 | 3.08  | 7.47   | 3.43  | 2.03E-02 |
| MROH5        | 4.60  | 1.62  | 2.98   | 2.85  | 2.03E-02 |
| BBS5         | 12.38 | 4.36  | 8.03   | 2.84  | 2.04E-02 |
| LOC105377331 | 9.29  | 0.00  | 9.29   | 9.29  | 2.04E-02 |
| SLC66A2      | 4.65  | 1.51  | 3.15   | 3.09  | 2.04E-02 |

|              |       |       |        |       |          |
|--------------|-------|-------|--------|-------|----------|
| LOC105374235 | 8.22  | 4.49  | 3.73   | 1.83  | 2.05E-02 |
| LOC105370531 | 5.70  | 2.58  | 3.12   | 2.21  | 2.05E-02 |
| LINC02681    | 23.72 | 7.41  | 16.31  | 3.20  | 2.06E-02 |
| IL26         | 7.66  | 20.27 | -12.60 | 0.38  | 2.06E-02 |
| ZNF430       | 10.48 | 5.43  | 5.05   | 1.93  | 2.07E-02 |
| C1orf220     | 11.87 | 2.91  | 8.96   | 4.08  | 2.08E-02 |
| MAGEF1       | 6.33  | 0.98  | 5.34   | 6.43  | 2.09E-02 |
| LOC105372683 | 8.86  | 3.60  | 5.26   | 2.46  | 2.09E-02 |
| LOC102723427 | 16.38 | 57.66 | -41.28 | 0.28  | 2.09E-02 |
| PYGL         | 16.78 | 6.70  | 10.08  | 2.51  | 2.10E-02 |
| HAO2         | 6.11  | 9.23  | -3.11  | 0.66  | 2.10E-02 |
| LOC105371157 | 8.41  | 0.30  | 8.10   | 27.65 | 2.10E-02 |
| ZNF771       | 0.38  | 5.00  | -4.62  | 0.08  | 2.11E-02 |
| LOC105379027 | 8.61  | 1.27  | 7.35   | 6.80  | 2.11E-02 |
| KRT34        | 0.46  | 0.07  | 0.40   | 7.02  | 2.11E-02 |
| LOC105379378 | 8.88  | 0.38  | 8.50   | 23.30 | 2.11E-02 |
| HEXA.AS1     | 6.49  | 2.44  | 4.05   | 2.66  | 2.11E-02 |
| FPR2         | 17.19 | 5.38  | 11.81  | 3.20  | 2.12E-02 |
| LOC105370952 | 10.67 | 3.09  | 7.58   | 3.45  | 2.12E-02 |
| STX10        | 4.98  | 0.63  | 4.35   | 7.92  | 2.12E-02 |
| LINC02505    | 10.85 | 40.37 | -29.52 | 0.27  | 2.12E-02 |
| CCDC74B      | 7.76  | 2.02  | 5.74   | 3.85  | 2.13E-02 |
| KIF3C        | 3.65  | 11.80 | -8.15  | 0.31  | 2.13E-02 |
| CDC42SE2     | 9.70  | 3.23  | 6.47   | 3.01  | 2.14E-02 |
| TNFSF13      | 3.49  | 0.00  | 3.49   | 3.49  | 2.15E-02 |
| LOC107986769 | 13.57 | 4.76  | 8.80   | 2.85  | 2.16E-02 |
| POLG         | 5.72  | 3.53  | 2.19   | 1.62  | 2.16E-02 |
| LOC107985141 | 8.78  | 3.70  | 5.08   | 2.37  | 2.16E-02 |
| SLMAP        | 10.62 | 4.83  | 5.79   | 2.20  | 2.16E-02 |
| CATSPERE     | 14.96 | 8.50  | 6.45   | 1.76  | 2.17E-02 |
| NNT.AS1      | 9.23  | 1.69  | 7.53   | 5.45  | 2.17E-02 |
| KRT71        | 13.94 | 5.08  | 8.86   | 2.74  | 2.18E-02 |
| AOC3         | 6.07  | 1.82  | 4.24   | 3.33  | 2.18E-02 |
| LINC02408    | 11.89 | 4.24  | 7.65   | 2.80  | 2.18E-02 |
| MGST3        | 20.91 | 3.48  | 17.43  | 6.01  | 2.18E-02 |
| EFEMP1       | 9.54  | 2.98  | 6.56   | 3.20  | 2.19E-02 |
| ZBTB5        | 4.85  | 1.67  | 3.18   | 2.90  | 2.20E-02 |
| ITGBL1       | 4.19  | 2.21  | 1.97   | 1.89  | 2.20E-02 |
| LOC100128882 | 10.26 | 2.37  | 7.90   | 4.34  | 2.20E-02 |
| SEC22B4P     | 4.09  | 1.81  | 2.28   | 2.26  | 2.20E-02 |
| LINC01506    | 13.70 | 0.90  | 12.81  | 15.30 | 2.21E-02 |
| LOC107983950 | 4.40  | 0.15  | 4.25   | 29.90 | 2.21E-02 |
| LOC107986782 | 6.33  | 1.57  | 4.76   | 4.03  | 2.21E-02 |
| NF1          | 14.74 | 8.71  | 6.04   | 1.69  | 2.22E-02 |
| LOC105369961 | 8.65  | 0.59  | 8.06   | 14.57 | 2.23E-02 |
| LOC105369408 | 12.51 | 3.41  | 9.10   | 3.67  | 2.24E-02 |
| CELSR1       | 5.60  | 2.55  | 3.05   | 2.20  | 2.26E-02 |



|              |       |       |        |       |          |
|--------------|-------|-------|--------|-------|----------|
| TCEANC2      | 9.68  | 4.58  | 5.10   | 2.11  | 2.26E-02 |
| DSTNP2       | 6.80  | 2.43  | 4.37   | 2.79  | 2.27E-02 |
| SPOUT1       | 5.49  | 1.68  | 3.81   | 3.27  | 2.27E-02 |
| LINC02724    | 5.20  | 0.89  | 4.31   | 5.86  | 2.28E-02 |
| GALNTL5      | 10.65 | 4.64  | 6.01   | 2.30  | 2.28E-02 |
| ZNF474.AS1   | 5.49  | 10.01 | -4.52  | 0.55  | 2.28E-02 |
| LINC02442    | 10.03 | 3.35  | 6.69   | 3.00  | 2.29E-02 |
| ELL2         | 6.00  | 9.20  | -3.20  | 0.65  | 2.29E-02 |
| LOC107984387 | 10.72 | 4.69  | 6.03   | 2.28  | 2.29E-02 |
| NAGS         | 3.74  | 0.67  | 3.06   | 5.54  | 2.30E-02 |
| LRRC59       | 3.85  | 11.28 | -7.44  | 0.34  | 2.30E-02 |
| LOC105370739 | 10.26 | 2.59  | 7.67   | 3.96  | 2.30E-02 |
| SNX7         | 13.87 | 4.39  | 9.48   | 3.16  | 2.31E-02 |
| ADORA1       | 5.99  | 1.31  | 4.69   | 4.59  | 2.31E-02 |
| PLPPR5       | 7.06  | 3.08  | 3.99   | 2.30  | 2.31E-02 |
| LOC105370593 | 10.98 | 5.09  | 5.89   | 2.16  | 2.32E-02 |
| PPP4R2       | 8.90  | 5.94  | 2.96   | 1.50  | 2.34E-02 |
| MIR4453HG    | 3.67  | 1.46  | 2.21   | 2.52  | 2.35E-02 |
| DEFB112      | 16.46 | 2.02  | 14.44  | 8.14  | 2.36E-02 |
| CHODL        | 8.79  | 4.54  | 4.24   | 1.93  | 2.36E-02 |
| MAB21L4      | 7.90  | 1.69  | 6.21   | 4.68  | 2.36E-02 |
| LOC107986263 | 15.57 | 7.63  | 7.94   | 2.04  | 2.36E-02 |
| LOC105374124 | 13.71 | 3.43  | 10.28  | 4.00  | 2.37E-02 |
| LOC105377743 | 9.86  | 3.43  | 6.43   | 2.87  | 2.37E-02 |
| PDIA5        | 5.54  | 13.82 | -8.28  | 0.40  | 2.37E-02 |
| CD2AP        | 19.11 | 7.47  | 11.65  | 2.56  | 2.37E-02 |
| NDUFA12      | 10.86 | 4.34  | 6.53   | 2.51  | 2.37E-02 |
| MAP11        | 4.75  | 0.28  | 4.47   | 16.76 | 2.37E-02 |
| CLVS1        | 9.49  | 2.93  | 6.57   | 3.24  | 2.39E-02 |
| LOC105374115 | 6.75  | 1.51  | 5.24   | 4.47  | 2.40E-02 |
| BAZ2B        | 14.40 | 6.79  | 7.61   | 2.12  | 2.40E-02 |
| TIAM2        | 11.39 | 5.40  | 5.99   | 2.11  | 2.40E-02 |
| ETS1.AS1     | 2.29  | 12.57 | -10.28 | 0.18  | 2.40E-02 |
| LOC105372696 | 3.11  | 14.61 | -11.49 | 0.21  | 2.41E-02 |
| LOC101928972 | 10.08 | 1.20  | 8.88   | 8.39  | 2.42E-02 |
| CECR3        | 7.85  | 1.24  | 6.62   | 6.36  | 2.42E-02 |
| VWC2         | 9.13  | 5.01  | 4.12   | 1.82  | 2.44E-02 |
| PKD2         | 8.66  | 4.02  | 4.65   | 2.16  | 2.44E-02 |
| LOC105373895 | 20.03 | 3.99  | 16.04  | 5.02  | 2.44E-02 |
| CMTR2_1      | 0.82  | 0.00  | 0.82   | 0.82  | 2.45E-02 |
| LOC105372669 | 5.54  | 14.10 | -8.56  | 0.39  | 2.45E-02 |
| LOC107986240 | 46.91 | 3.72  | 43.19  | 12.60 | 2.45E-02 |
| PLAGL1       | 17.77 | 4.77  | 13.00  | 3.73  | 2.45E-02 |
| LOC101927817 | 9.45  | 2.56  | 6.88   | 3.68  | 2.47E-02 |
| BRDT         | 19.88 | 8.79  | 11.09  | 2.26  | 2.47E-02 |
| LOC102724475 | 12.92 | 4.33  | 8.60   | 2.99  | 2.48E-02 |
| PNMA1        | 2.01  | 8.41  | -6.41  | 0.24  | 2.48E-02 |

|              |       |       |        |       |          |
|--------------|-------|-------|--------|-------|----------|
| LINC00976    | 17.80 | 3.63  | 14.16  | 4.90  | 2.49E-02 |
| MED14        | 7.57  | 4.16  | 3.41   | 1.82  | 2.49E-02 |
| LOC105374796 | 3.98  | 0.51  | 3.47   | 7.84  | 2.51E-02 |
| C19orf18     | 24.83 | 4.09  | 20.74  | 6.08  | 2.52E-02 |
| BECN1        | 6.34  | 2.18  | 4.16   | 2.90  | 2.52E-02 |
| LOC107986169 | 12.45 | 3.19  | 9.26   | 3.90  | 2.53E-02 |
| ABCA6        | 16.59 | 10.89 | 5.70   | 1.52  | 2.53E-02 |
| ARMC10       | 6.04  | 1.78  | 4.26   | 3.40  | 2.54E-02 |
| HTR2C        | 7.17  | 3.13  | 4.04   | 2.29  | 2.54E-02 |
| LYRM4.AS1    | 10.31 | 3.88  | 6.44   | 2.66  | 2.55E-02 |
| LPP.AS2      | 3.00  | 0.37  | 2.63   | 8.09  | 2.55E-02 |
| LOC105370462 | 9.00  | 2.72  | 6.28   | 3.31  | 2.56E-02 |
| LRP2BP       | 4.26  | 8.10  | -3.84  | 0.53  | 2.56E-02 |
| EHHADH       | 5.84  | 16.36 | -10.53 | 0.36  | 2.57E-02 |
| OR2L2        | 5.70  | 18.28 | -12.58 | 0.31  | 2.57E-02 |
| SPZ1         | 3.61  | 12.25 | -8.65  | 0.29  | 2.58E-02 |
| RCL1         | 11.94 | 3.49  | 8.45   | 3.42  | 2.58E-02 |
| LOC388813    | 11.57 | 2.09  | 9.48   | 5.55  | 2.58E-02 |
| ZNF738       | 14.42 | 8.52  | 5.89   | 1.69  | 2.59E-02 |
| HIRIP3       | 4.01  | 0.76  | 3.25   | 5.25  | 2.62E-02 |
| LOC105378010 | 22.03 | 8.07  | 13.96  | 2.73  | 2.62E-02 |
| CFP          | 5.66  | 1.82  | 3.84   | 3.11  | 2.63E-02 |
| LOC105375742 | 2.04  | 10.74 | -8.70  | 0.19  | 2.64E-02 |
| UBE2K        | 12.43 | 3.83  | 8.61   | 3.25  | 2.64E-02 |
| LINC01834    | 7.12  | 1.14  | 5.98   | 6.25  | 2.64E-02 |
| ADAMTS3      | 15.95 | 7.76  | 8.19   | 2.06  | 2.64E-02 |
| GLS          | 12.75 | 8.46  | 4.29   | 1.51  | 2.64E-02 |
| ARCN1        | 5.87  | 17.21 | -11.34 | 0.34  | 2.64E-02 |
| TREM1        | 4.44  | 8.78  | -4.34  | 0.51  | 2.64E-02 |
| LAMTOR5.AS1  | 11.94 | 0.16  | 11.78  | 74.58 | 2.66E-02 |
| SPOCD1       | 6.63  | 1.81  | 4.81   | 3.66  | 2.66E-02 |
| MXD3         | 1.85  | 0.07  | 1.78   | 26.66 | 2.66E-02 |
| TRPC7        | 8.70  | 3.36  | 5.34   | 2.59  | 2.66E-02 |
| LRIT1        | 5.64  | 1.21  | 4.43   | 4.68  | 2.66E-02 |
| LOC105374664 | 15.91 | 6.06  | 9.85   | 2.62  | 2.67E-02 |
| TMEM63A      | 6.77  | 2.66  | 4.11   | 2.54  | 2.68E-02 |
| DHX8         | 5.83  | 11.12 | -5.29  | 0.52  | 2.68E-02 |
| OR8S1        | 6.59  | 0.16  | 6.44   | 41.74 | 2.68E-02 |
| CCDC54       | 20.33 | 3.91  | 16.42  | 5.20  | 2.68E-02 |
| MEG3         | 12.53 | 5.15  | 7.38   | 2.43  | 2.69E-02 |
| RNPS1        | 13.07 | 3.20  | 9.87   | 4.09  | 2.69E-02 |
| GSE1         | 6.52  | 3.57  | 2.95   | 1.82  | 2.70E-02 |
| LOC107984361 | 3.90  | 8.96  | -5.06  | 0.44  | 2.70E-02 |
| LOC105377085 | 8.19  | 3.87  | 4.32   | 2.12  | 2.70E-02 |
| CYP7B1       | 8.37  | 5.63  | 2.75   | 1.49  | 2.71E-02 |
| PLA2G2C      | 5.02  | 1.97  | 3.05   | 2.55  | 2.71E-02 |
| LINC02075    | 9.36  | 1.10  | 8.26   | 8.51  | 2.72E-02 |

|              |       |       |        |       |          |
|--------------|-------|-------|--------|-------|----------|
| LOC112268016 | 4.43  | 2.41  | 2.02   | 1.84  | 2.72E-02 |
| LINC00528    | 3.39  | 0.82  | 2.56   | 4.12  | 2.73E-02 |
| LINC00543    | 5.25  | 1.34  | 3.91   | 3.92  | 2.73E-02 |
| FAM131A      | 7.28  | 1.13  | 6.15   | 6.43  | 2.74E-02 |
| OTOL1        | 6.27  | 2.41  | 3.86   | 2.60  | 2.74E-02 |
| ALG10B       | 10.52 | 4.74  | 5.78   | 2.22  | 2.74E-02 |
| FARP2        | 9.83  | 2.88  | 6.95   | 3.41  | 2.74E-02 |
| HECW2.AS1    | 23.88 | 6.86  | 17.01  | 3.48  | 2.75E-02 |
| LOC105371544 | 28.03 | 9.81  | 18.22  | 2.86  | 2.75E-02 |
| LOC102723348 | 2.07  | 10.92 | -8.85  | 0.19  | 2.75E-02 |
| ABTB1        | 2.89  | 8.93  | -6.04  | 0.32  | 2.76E-02 |
| LINC01104    | 6.91  | 1.76  | 5.15   | 3.93  | 2.76E-02 |
| EPX          | 4.24  | 1.40  | 2.84   | 3.03  | 2.76E-02 |
| ENPP5        | 10.23 | 3.19  | 7.03   | 3.20  | 2.77E-02 |
| TMEM230      | 12.41 | 5.53  | 6.88   | 2.24  | 2.77E-02 |
| GLCE         | 7.28  | 12.00 | -4.71  | 0.61  | 2.77E-02 |
| EME1         | 8.95  | 2.78  | 6.18   | 3.22  | 2.77E-02 |
| TRAV23DV6    | 9.38  | 0.41  | 8.97   | 22.75 | 2.78E-02 |
| LOC102723370 | 9.15  | 29.63 | -20.47 | 0.31  | 2.79E-02 |
| LOC100508046 | 4.55  | 0.87  | 3.69   | 5.26  | 2.79E-02 |
| VPS52_5      | 0.32  | 0.00  | 0.32   | 0.32  | 2.79E-02 |
| RBM23        | 9.12  | 4.90  | 4.22   | 1.86  | 2.81E-02 |
| ERC2         | 12.11 | 8.94  | 3.17   | 1.36  | 2.81E-02 |
| AZI2         | 4.56  | 0.85  | 3.71   | 5.35  | 2.81E-02 |
| LOC105376281 | 8.14  | 1.32  | 6.81   | 6.15  | 2.82E-02 |
| LINC01415    | 8.26  | 4.47  | 3.79   | 1.85  | 2.82E-02 |
| ATP8B5P      | 11.90 | 6.51  | 5.39   | 1.83  | 2.82E-02 |
| LOC105370960 | 5.80  | 1.67  | 4.13   | 3.47  | 2.82E-02 |
| YES1         | 8.77  | 5.43  | 3.34   | 1.61  | 2.83E-02 |
| PHTF1        | 14.67 | 9.27  | 5.41   | 1.58  | 2.83E-02 |
| ZDHHC2       | 3.31  | 1.45  | 1.86   | 2.28  | 2.83E-02 |
| PRSS40B      | 0.52  | 0.00  | 0.52   | 0.52  | 2.83E-02 |
| LOC107984270 | 9.80  | 3.78  | 6.02   | 2.59  | 2.84E-02 |
| TRIM64B      | 8.80  | 28.06 | -19.26 | 0.31  | 2.84E-02 |
| GTF3A        | 13.52 | 2.85  | 10.67  | 4.74  | 2.84E-02 |
| LOC105372551 | 4.85  | 14.64 | -9.79  | 0.33  | 2.85E-02 |
| KDM3A        | 21.25 | 11.28 | 9.96   | 1.88  | 2.85E-02 |
| TBPL2        | 14.33 | 7.30  | 7.03   | 1.96  | 2.86E-02 |
| LOC101927948 | 15.76 | 1.75  | 14.01  | 8.99  | 2.87E-02 |
| AADAC        | 24.90 | 10.80 | 14.10  | 2.30  | 2.87E-02 |
| CXXC4        | 7.62  | 4.56  | 3.06   | 1.67  | 2.88E-02 |
| ZC3HAV1      | 8.62  | 3.78  | 4.84   | 2.28  | 2.88E-02 |
| OR5B21       | 11.40 | 3.98  | 7.42   | 2.87  | 2.89E-02 |
| CKS2         | 9.57  | 0.97  | 8.60   | 9.82  | 2.90E-02 |
| BIRC8        | 10.01 | 2.55  | 7.47   | 3.93  | 2.90E-02 |
| LOC101928168 | 8.80  | 2.44  | 6.37   | 3.61  | 2.90E-02 |
| CIPC         | 4.36  | 12.73 | -8.36  | 0.34  | 2.90E-02 |

|              |       |       |        |       |          |
|--------------|-------|-------|--------|-------|----------|
| NANOGP8      | 4.15  | 1.39  | 2.77   | 2.99  | 2.90E-02 |
| COL4A3       | 11.75 | 4.31  | 7.44   | 2.73  | 2.90E-02 |
| LOC105369149 | 4.75  | 0.84  | 3.91   | 5.65  | 2.90E-02 |
| LOC107986887 | 5.04  | 0.67  | 4.37   | 7.50  | 2.91E-02 |
| LOC107986167 | 12.42 | 8.63  | 3.79   | 1.44  | 2.91E-02 |
| LOC102725148 | 11.33 | 5.26  | 6.07   | 2.15  | 2.92E-02 |
| LOC105372562 | 3.48  | 16.57 | -13.09 | 0.21  | 2.92E-02 |
| TAF8         | 5.99  | 3.47  | 2.53   | 1.73  | 2.93E-02 |
| MAFG.DT      | 2.38  | 0.49  | 1.89   | 4.87  | 2.93E-02 |
| MIR3974      | 39.52 | 13.22 | 26.30  | 2.99  | 2.94E-02 |
| CSN1S1       | 22.22 | 12.01 | 10.21  | 1.85  | 2.95E-02 |
| DDHD1        | 12.02 | 6.71  | 5.31   | 1.79  | 2.96E-02 |
| LOC105378337 | 26.83 | 7.02  | 19.81  | 3.82  | 2.96E-02 |
| GJD2         | 3.33  | 10.89 | -7.56  | 0.31  | 2.96E-02 |
| ADGRG3       | 4.19  | 1.86  | 2.34   | 2.26  | 2.96E-02 |
| IGHVII.78.1  | 7.65  | 0.00  | 7.65   | 7.65  | 2.97E-02 |
| LCMT1.AS2    | 5.13  | 1.94  | 3.19   | 2.64  | 2.97E-02 |
| LOC105369388 | 10.68 | 4.30  | 6.38   | 2.49  | 2.97E-02 |
| LINC00444    | 9.72  | 2.82  | 6.89   | 3.44  | 2.97E-02 |
| CISD2        | 9.65  | 3.67  | 5.98   | 2.63  | 2.98E-02 |
| FHOD3        | 5.40  | 9.26  | -3.86  | 0.58  | 2.98E-02 |
| ACTR1A       | 5.76  | 3.03  | 2.74   | 1.90  | 2.99E-02 |
| NDST4        | 11.89 | 5.51  | 6.39   | 2.16  | 2.99E-02 |
| CKS1B        | 10.90 | 2.81  | 8.09   | 3.88  | 2.99E-02 |
| LOC107986833 | 5.25  | 0.76  | 4.50   | 6.94  | 2.99E-02 |
| LOC101928424 | 17.20 | 1.46  | 15.74  | 11.75 | 2.99E-02 |
| ANKRD20A21P  | 18.53 | 10.16 | 8.37   | 1.82  | 3.00E-02 |
| ATP1B3       | 17.66 | 5.68  | 11.98  | 3.11  | 3.00E-02 |
| LOC105377582 | 16.61 | 4.87  | 11.73  | 3.41  | 3.00E-02 |
| LOC105371203 | 9.96  | 2.78  | 7.18   | 3.58  | 3.01E-02 |
| LOC105374363 | 8.80  | 0.28  | 8.52   | 31.98 | 3.02E-02 |
| ENC1         | 7.95  | 4.15  | 3.80   | 1.91  | 3.02E-02 |
| MYRIP        | 8.48  | 4.28  | 4.19   | 1.98  | 3.02E-02 |
| TTYH3        | 5.09  | 0.75  | 4.34   | 6.82  | 3.03E-02 |
| GACAT1       | 27.20 | 10.29 | 16.91  | 2.64  | 3.03E-02 |
| LOC101927432 | 9.90  | 5.59  | 4.32   | 1.77  | 3.03E-02 |
| SMIM23       | 11.06 | 1.81  | 9.25   | 6.10  | 3.04E-02 |
| MT3          | 10.31 | 0.71  | 9.60   | 14.52 | 3.04E-02 |
| LOC101928180 | 9.09  | 3.32  | 5.77   | 2.74  | 3.04E-02 |
| ZNF789       | 12.04 | 6.64  | 5.40   | 1.81  | 3.05E-02 |
| LINC01147    | 20.78 | 2.66  | 18.12  | 7.80  | 3.07E-02 |
| PLPP4        | 3.68  | 7.18  | -3.50  | 0.51  | 3.07E-02 |
| S1PR3        | 10.01 | 2.17  | 7.84   | 4.61  | 3.07E-02 |
| LINC00449    | 27.63 | 3.51  | 24.12  | 7.87  | 3.08E-02 |
| NR2F1        | 7.14  | 1.86  | 5.29   | 3.85  | 3.08E-02 |
| ESPN         | 1.94  | 4.92  | -2.98  | 0.39  | 3.08E-02 |
| INHBB        | 6.63  | 2.89  | 3.74   | 2.30  | 3.10E-02 |

|              |       |       |        |       |          |
|--------------|-------|-------|--------|-------|----------|
| THUMPD1      | 11.53 | 4.35  | 7.19   | 2.65  | 3.10E-02 |
| LOC105374974 | 8.11  | 33.20 | -25.09 | 0.24  | 3.10E-02 |
| LOC102723862 | 10.22 | 4.44  | 5.78   | 2.30  | 3.11E-02 |
| CA8          | 8.92  | 4.10  | 4.83   | 2.18  | 3.12E-02 |
| LOC105372394 | 41.74 | 5.74  | 36.00  | 7.27  | 3.12E-02 |
| GPX8         | 8.24  | 16.70 | -8.46  | 0.49  | 3.12E-02 |
| NIM1K        | 1.67  | 8.18  | -6.51  | 0.20  | 3.13E-02 |
| LOC105370588 | 13.17 | 5.31  | 7.87   | 2.48  | 3.13E-02 |
| LINC02341    | 8.48  | 2.95  | 5.53   | 2.88  | 3.13E-02 |
| ZNF70        | 4.26  | 7.85  | -3.59  | 0.54  | 3.13E-02 |
| COMMD6       | 9.33  | 3.36  | 5.97   | 2.78  | 3.14E-02 |
| GUCY1B2      | 14.08 | 5.48  | 8.60   | 2.57  | 3.14E-02 |
| PLEKHG3      | 5.91  | 1.41  | 4.50   | 4.20  | 3.15E-02 |
| STK38L       | 11.93 | 6.92  | 5.01   | 1.72  | 3.15E-02 |
| LINC02464    | 7.16  | 1.92  | 5.25   | 3.74  | 3.15E-02 |
| TEX30        | 12.08 | 3.86  | 8.22   | 3.13  | 3.16E-02 |
| RAD51AP1     | 6.94  | 29.69 | -22.76 | 0.23  | 3.16E-02 |
| LOC105378375 | 4.26  | 12.79 | -8.52  | 0.33  | 3.16E-02 |
| FPGT         | 8.85  | 2.65  | 6.19   | 3.34  | 3.16E-02 |
| ZMYND15      | 6.97  | 2.93  | 4.03   | 2.38  | 3.16E-02 |
| EXOC6B       | 11.72 | 6.83  | 4.89   | 1.72  | 3.17E-02 |
| LOC105374636 | 15.51 | 7.50  | 8.01   | 2.07  | 3.17E-02 |
| LPL          | 5.22  | 24.95 | -19.73 | 0.21  | 3.17E-02 |
| ADAMTS1      | 9.55  | 4.39  | 5.16   | 2.18  | 3.18E-02 |
| EIF3B        | 15.08 | 6.70  | 8.38   | 2.25  | 3.18E-02 |
| LOC105372026 | 5.10  | 9.13  | -4.03  | 0.56  | 3.18E-02 |
| FGF2         | 13.08 | 5.61  | 7.47   | 2.33  | 3.19E-02 |
| LOC102723480 | 7.04  | 1.89  | 5.15   | 3.73  | 3.19E-02 |
| LOC101929534 | 6.73  | 10.44 | -3.71  | 0.64  | 3.20E-02 |
| CFAP58.DT    | 12.83 | 2.18  | 10.65  | 5.88  | 3.20E-02 |
| LINC02362    | 24.68 | 4.86  | 19.82  | 5.08  | 3.21E-02 |
| B3GALT1      | 12.01 | 5.69  | 6.32   | 2.11  | 3.21E-02 |
| ASPRV1       | 8.03  | 0.26  | 7.76   | 30.31 | 3.21E-02 |
| LOC102724378 | 6.31  | 0.13  | 6.18   | 47.70 | 3.22E-02 |
| MRPL11       | 10.17 | 1.40  | 8.77   | 7.29  | 3.22E-02 |
| LINC01818    | 10.28 | 3.69  | 6.59   | 2.79  | 3.23E-02 |
| TIA1         | 10.90 | 4.43  | 6.47   | 2.46  | 3.23E-02 |
| LOC105377412 | 7.99  | 1.52  | 6.47   | 5.26  | 3.23E-02 |
| KCNH2        | 3.87  | 8.62  | -4.75  | 0.45  | 3.24E-02 |
| LINC02068    | 15.11 | 5.00  | 10.11  | 3.02  | 3.24E-02 |
| TAL2         | 19.40 | 2.21  | 17.18  | 8.76  | 3.24E-02 |
| CREB3L2.AS1  | 5.12  | 25.79 | -20.66 | 0.20  | 3.25E-02 |
| IL1R2        | 9.96  | 4.84  | 5.12   | 2.06  | 3.25E-02 |
| MFAP1        | 20.70 | 5.48  | 15.22  | 3.78  | 3.25E-02 |
| LOC107984653 | 18.18 | 1.82  | 16.35  | 9.97  | 3.25E-02 |
| UCN          | 5.52  | 0.00  | 5.52   | 5.52  | 3.26E-02 |
| CNN3         | 18.33 | 5.40  | 12.94  | 3.40  | 3.26E-02 |

|              |       |       |        |       |          |
|--------------|-------|-------|--------|-------|----------|
| LINC02284    | 8.79  | 18.38 | -9.59  | 0.48  | 3.26E-02 |
| LOC107984690 | 2.07  | 6.34  | -4.27  | 0.33  | 3.26E-02 |
| KPTN         | 9.32  | 3.29  | 6.03   | 2.83  | 3.26E-02 |
| TRPA1        | 9.38  | 25.65 | -16.26 | 0.37  | 3.26E-02 |
| LOC105375703 | 14.34 | 2.32  | 12.02  | 6.19  | 3.27E-02 |
| LOC105374748 | 3.71  | 13.09 | -9.39  | 0.28  | 3.27E-02 |
| CALCOCO2     | 11.18 | 5.15  | 6.03   | 2.17  | 3.27E-02 |
| LOC105375773 | 14.53 | 1.62  | 12.91  | 8.97  | 3.27E-02 |
| LOC112267900 | 9.02  | 4.82  | 4.20   | 1.87  | 3.28E-02 |
| FAM20B       | 10.95 | 4.39  | 6.56   | 2.49  | 3.28E-02 |
| ACAD10       | 9.69  | 3.65  | 6.04   | 2.66  | 3.29E-02 |
| LOC105375993 | 8.66  | 2.29  | 6.37   | 3.78  | 3.30E-02 |
| SNRNP48      | 9.46  | 4.89  | 4.57   | 1.93  | 3.30E-02 |
| LOC107984643 | 3.11  | 0.61  | 2.50   | 5.12  | 3.30E-02 |
| LOC105369383 | 7.02  | 2.74  | 4.28   | 2.56  | 3.30E-02 |
| TMEM117      | 13.32 | 4.39  | 8.93   | 3.03  | 3.31E-02 |
| THG1L        | 13.36 | 3.83  | 9.53   | 3.49  | 3.31E-02 |
| SLC6A7       | 8.75  | 2.14  | 6.62   | 4.09  | 3.31E-02 |
| PRRX1        | 8.94  | 3.90  | 5.04   | 2.29  | 3.32E-02 |
| LOC105375230 | 7.54  | 2.53  | 5.02   | 2.98  | 3.32E-02 |
| SOBP         | 6.44  | 3.14  | 3.29   | 2.05  | 3.32E-02 |
| LOC105373228 | 11.48 | 0.81  | 10.67  | 14.22 | 3.33E-02 |
| CDRT7        | 14.29 | 2.46  | 11.84  | 5.82  | 3.34E-02 |
| LRRC47       | 6.33  | 2.34  | 3.99   | 2.71  | 3.34E-02 |
| LOC105370672 | 4.01  | 16.11 | -12.09 | 0.25  | 3.35E-02 |
| SUGCT        | 6.72  | 14.87 | -8.14  | 0.45  | 3.35E-02 |
| LOC105371235 | 3.67  | 1.07  | 2.60   | 3.42  | 3.36E-02 |
| LINC01975    | 3.87  | 1.07  | 2.80   | 3.61  | 3.36E-02 |
| KHK          | 3.31  | 0.72  | 2.59   | 4.60  | 3.37E-02 |
| MBOAT2       | 10.54 | 4.79  | 5.76   | 2.20  | 3.37E-02 |
| LOC105372679 | 17.16 | 4.29  | 12.88  | 4.00  | 3.37E-02 |
| LOC105374652 | 20.01 | 4.84  | 15.17  | 4.13  | 3.38E-02 |
| LOC105377410 | 14.01 | 3.53  | 10.48  | 3.96  | 3.38E-02 |
| KRTAP4.4     | 9.01  | 2.82  | 6.18   | 3.19  | 3.38E-02 |
| LRRC18       | 3.34  | 9.95  | -6.61  | 0.34  | 3.39E-02 |
| LOC107984546 | 8.14  | 3.22  | 4.92   | 2.52  | 3.39E-02 |
| HHLA1        | 5.16  | 10.27 | -5.11  | 0.50  | 3.40E-02 |
| LOC105370071 | 7.91  | 2.16  | 5.75   | 3.66  | 3.41E-02 |
| LINC01638    | 15.21 | 3.74  | 11.47  | 4.06  | 3.41E-02 |
| LOC107986920 | 12.28 | 0.98  | 11.30  | 12.55 | 3.41E-02 |
| CSN3         | 26.47 | 8.41  | 18.06  | 3.15  | 3.42E-02 |
| RUSF1        | 8.09  | 2.12  | 5.97   | 3.82  | 3.43E-02 |
| AKR1C1       | 9.93  | 3.59  | 6.35   | 2.77  | 3.44E-02 |
| LOC105373182 | 6.30  | 1.61  | 4.70   | 3.93  | 3.45E-02 |
| FOXF1        | 6.08  | 1.44  | 4.64   | 4.23  | 3.45E-02 |
| GDI1         | 1.38  | 6.39  | -5.01  | 0.22  | 3.46E-02 |
| TRMT1L       | 18.20 | 6.87  | 11.33  | 2.65  | 3.46E-02 |

|              |       |       |       |       |          |
|--------------|-------|-------|-------|-------|----------|
| PRR20G       | 4.87  | 0.25  | 4.63  | 19.83 | 3.46E-02 |
| EEA1         | 15.61 | 8.26  | 7.35  | 1.89  | 3.47E-02 |
| MGME1        | 3.90  | 8.64  | -4.74 | 0.45  | 3.47E-02 |
| MIR591       | 44.84 | 1.91  | 42.93 | 23.49 | 3.47E-02 |
| POP7         | 12.95 | 1.79  | 11.16 | 7.25  | 3.48E-02 |
| IER3IP1      | 4.32  | 9.00  | -4.68 | 0.48  | 3.48E-02 |
| LINC02354    | 10.80 | 2.65  | 8.15  | 4.07  | 3.48E-02 |
| LOC105376850 | 5.70  | 2.36  | 3.34  | 2.42  | 3.48E-02 |
| LOC105373386 | 1.12  | 0.36  | 0.76  | 3.08  | 3.48E-02 |
| LOC107985279 | 1.02  | 0.00  | 1.02  | 1.02  | 3.49E-02 |
| LOC105376341 | 3.59  | 1.82  | 1.76  | 1.97  | 3.49E-02 |
| LOC107984659 | 11.42 | 3.13  | 8.29  | 3.65  | 3.49E-02 |
| LOC107986088 | 12.70 | 5.60  | 7.10  | 2.27  | 3.49E-02 |
| IL6.AS1      | 6.70  | 1.01  | 5.69  | 6.66  | 3.50E-02 |
| FAM53C       | 4.21  | 1.80  | 2.41  | 2.34  | 3.50E-02 |
| NDP          | 3.18  | 10.31 | -7.13 | 0.31  | 3.50E-02 |
| ZC2HC1A      | 5.21  | 9.41  | -4.20 | 0.55  | 3.51E-02 |
| ERCC6L       | 8.99  | 4.47  | 4.52  | 2.01  | 3.51E-02 |
| ASB15        | 8.72  | 14.65 | -5.93 | 0.60  | 3.51E-02 |
| LOC105372439 | 5.69  | 0.22  | 5.48  | 26.45 | 3.51E-02 |
| LOC112267951 | 2.37  | 0.67  | 1.70  | 3.55  | 3.51E-02 |
| ZBTB41       | 9.82  | 6.38  | 3.44  | 1.54  | 3.51E-02 |
| LOC107984585 | 16.65 | 5.52  | 11.13 | 3.02  | 3.52E-02 |
| LOC105376448 | 17.16 | 2.74  | 14.42 | 6.26  | 3.52E-02 |
| ITGA11       | 7.68  | 4.18  | 3.49  | 1.84  | 3.52E-02 |
| KBTBD6       | 8.52  | 4.13  | 4.39  | 2.06  | 3.53E-02 |
| SHB          | 5.90  | 2.19  | 3.72  | 2.70  | 3.53E-02 |
| ASB16.AS1    | 4.69  | 1.77  | 2.91  | 2.65  | 3.53E-02 |
| PHYKPL       | 10.81 | 3.89  | 6.92  | 2.78  | 3.54E-02 |
| RNY1         | 14.37 | 0.00  | 14.37 | 14.37 | 3.54E-02 |
| RGL3         | 6.64  | 3.08  | 3.56  | 2.15  | 3.54E-02 |
| LOC105377893 | 34.24 | 2.45  | 31.80 | 13.99 | 3.55E-02 |
| LOC107985890 | 9.67  | 3.71  | 5.96  | 2.61  | 3.55E-02 |
| LOC102723381 | 12.76 | 3.67  | 9.09  | 3.48  | 3.56E-02 |
| VHL          | 16.94 | 3.14  | 13.80 | 5.40  | 3.56E-02 |
| RNF125       | 6.64  | 14.09 | -7.45 | 0.47  | 3.56E-02 |
| LOC654780    | 3.20  | 1.02  | 2.18  | 3.13  | 3.56E-02 |
| RAD23A       | 3.87  | 0.10  | 3.77  | 38.32 | 3.56E-02 |
| EDC4         | 4.30  | 8.17  | -3.88 | 0.53  | 3.57E-02 |
| LOC105375431 | 2.64  | 9.74  | -7.09 | 0.27  | 3.57E-02 |
| LOC105374292 | 11.66 | 5.89  | 5.77  | 1.98  | 3.57E-02 |
| PSTPIP2      | 11.36 | 3.44  | 7.92  | 3.30  | 3.57E-02 |
| PPP6C        | 19.43 | 13.39 | 6.04  | 1.45  | 3.58E-02 |
| TUBGCP5_2    | 0.54  | 0.00  | 0.54  | 0.54  | 3.58E-02 |
| SEC22A       | 5.78  | 12.00 | -6.22 | 0.48  | 3.58E-02 |
| NBPF22P      | 3.64  | 11.97 | -8.32 | 0.30  | 3.59E-02 |
| MIR4738      | 16.93 | 0.00  | 16.93 | 16.93 | 3.59E-02 |

|              |       |       |        |       |          |
|--------------|-------|-------|--------|-------|----------|
| TMEM9        | 7.23  | 2.30  | 4.93   | 3.15  | 3.60E-02 |
| LOC105373893 | 10.16 | 4.05  | 6.11   | 2.51  | 3.60E-02 |
| LOC107985135 | 6.93  | 17.20 | -10.27 | 0.40  | 3.60E-02 |
| GYS2         | 9.50  | 4.23  | 5.27   | 2.24  | 3.61E-02 |
| SCGB1D2      | 6.36  | 0.75  | 5.61   | 8.50  | 3.61E-02 |
| LOC105371261 | 5.24  | 39.94 | -34.70 | 0.13  | 3.61E-02 |
| PSMD14       | 14.94 | 28.71 | -13.77 | 0.52  | 3.61E-02 |
| KRTAP4.8     | 5.33  | 0.55  | 4.79   | 9.75  | 3.61E-02 |
| BDNF.AS      | 10.54 | 2.77  | 7.78   | 3.81  | 3.62E-02 |
| LOC105371254 | 0.56  | 0.00  | 0.56   | 0.56  | 3.62E-02 |
| COASY        | 6.76  | 1.08  | 5.69   | 6.29  | 3.62E-02 |
| COMMD9       | 11.71 | 5.42  | 6.28   | 2.16  | 3.62E-02 |
| MIR194.1     | 14.59 | 0.00  | 14.59  | 14.59 | 3.63E-02 |
| CERS4        | 1.99  | 5.06  | -3.07  | 0.39  | 3.63E-02 |
| LOC107985324 | 0.49  | 0.00  | 0.49   | 0.49  | 3.64E-02 |
| KDM4A.AS1    | 6.49  | 2.04  | 4.45   | 3.18  | 3.64E-02 |
| MARS2        | 5.73  | 1.44  | 4.29   | 3.97  | 3.64E-02 |
| THEGL        | 10.63 | 6.11  | 4.52   | 1.74  | 3.64E-02 |
| LOC105373528 | 11.61 | 3.83  | 7.78   | 3.03  | 3.65E-02 |
| LDLRAD1      | 9.79  | 2.44  | 7.35   | 4.02  | 3.65E-02 |
| PSG8.AS1     | 10.44 | 2.74  | 7.70   | 3.81  | 3.65E-02 |
| RBFOX3       | 5.90  | 13.77 | -7.87  | 0.43  | 3.66E-02 |
| PDE7B        | 10.27 | 5.55  | 4.73   | 1.85  | 3.67E-02 |
| SYCP3        | 12.44 | 19.52 | -7.08  | 0.64  | 3.68E-02 |
| LINC02450    | 8.26  | 1.91  | 6.35   | 4.32  | 3.68E-02 |
| LOC102724776 | 15.69 | 6.01  | 9.68   | 2.61  | 3.68E-02 |
| LOC105371276 | 17.00 | 3.21  | 13.79  | 5.30  | 3.68E-02 |
| MAS1         | 7.88  | 4.03  | 3.84   | 1.95  | 3.69E-02 |
| LOC101929141 | 2.73  | 0.22  | 2.51   | 12.25 | 3.69E-02 |
| KCTD10       | 5.58  | 17.58 | -12.00 | 0.32  | 3.69E-02 |
| LOC105372173 | 10.99 | 4.87  | 6.12   | 2.26  | 3.69E-02 |
| LOC105372208 | 5.19  | 16.81 | -11.62 | 0.31  | 3.70E-02 |
| TMEM253      | 8.08  | 2.25  | 5.83   | 3.59  | 3.70E-02 |
| LOC107984716 | 17.96 | 5.15  | 12.81  | 3.49  | 3.71E-02 |
| LOC107985595 | 8.74  | 1.99  | 6.75   | 4.38  | 3.71E-02 |
| TMEM39B      | 11.87 | 5.33  | 6.54   | 2.23  | 3.72E-02 |
| LOC105376826 | 9.93  | 1.36  | 8.57   | 7.28  | 3.72E-02 |
| ADPGK        | 4.54  | 7.91  | -3.37  | 0.57  | 3.72E-02 |
| LOC101928505 | 13.18 | 3.80  | 9.38   | 3.46  | 3.72E-02 |
| LRRC17       | 5.06  | 12.12 | -7.07  | 0.42  | 3.72E-02 |
| QTRT2        | 9.41  | 6.00  | 3.41   | 1.57  | 3.73E-02 |
| DENND2B      | 8.40  | 3.75  | 4.65   | 2.24  | 3.73E-02 |
| MAT2A        | 11.32 | 3.86  | 7.46   | 2.93  | 3.73E-02 |
| EHF          | 8.63  | 4.09  | 4.53   | 2.11  | 3.73E-02 |
| ZNF286A      | 7.71  | 3.62  | 4.09   | 2.13  | 3.73E-02 |
| LOC105370846 | 8.15  | 3.62  | 4.53   | 2.25  | 3.73E-02 |
| LINC01405    | 6.02  | 0.34  | 5.68   | 17.78 | 3.73E-02 |



|              |       |       |        |       |          |
|--------------|-------|-------|--------|-------|----------|
| CYTH2        | 6.48  | 3.37  | 3.11   | 1.92  | 3.74E-02 |
| TMEM67       | 14.69 | 9.34  | 5.35   | 1.57  | 3.74E-02 |
| LINC01650    | 11.57 | 4.54  | 7.03   | 2.55  | 3.75E-02 |
| DUSP29       | 1.96  | 0.03  | 1.92   | 57.76 | 3.75E-02 |
| LOC107985681 | 1.89  | 8.33  | -6.44  | 0.23  | 3.76E-02 |
| LOC105379002 | 15.47 | 2.31  | 13.15  | 6.68  | 3.76E-02 |
| PHLDA1       | 8.65  | 5.10  | 3.55   | 1.70  | 3.76E-02 |
| LOC105370052 | 8.64  | 4.52  | 4.12   | 1.91  | 3.76E-02 |
| LOC105372785 | 3.57  | 0.56  | 3.01   | 6.42  | 3.76E-02 |
| ZBTB8B       | 8.28  | 5.41  | 2.88   | 1.53  | 3.77E-02 |
| HOTAIRM1     | 10.54 | 3.01  | 7.52   | 3.50  | 3.78E-02 |
| LOC105376587 | 20.89 | 2.91  | 17.98  | 7.17  | 3.78E-02 |
| PUDP         | 6.91  | 2.13  | 4.79   | 3.25  | 3.78E-02 |
| GOLGA2P6     | 6.88  | 1.28  | 5.60   | 5.38  | 3.78E-02 |
| ADAP2        | 4.15  | 7.55  | -3.40  | 0.55  | 3.78E-02 |
| NIPAL2       | 13.04 | 4.78  | 8.26   | 2.73  | 3.79E-02 |
| LOC102724738 | 2.39  | 0.45  | 1.94   | 5.29  | 3.79E-02 |
| LINC00884    | 4.74  | 0.78  | 3.96   | 6.10  | 3.79E-02 |
| AP1M2        | 3.19  | 6.93  | -3.75  | 0.46  | 3.80E-02 |
| LOC112268124 | 3.61  | 0.57  | 3.04   | 6.33  | 3.81E-02 |
| GPR158       | 6.09  | 9.28  | -3.19  | 0.66  | 3.82E-02 |
| ZNF19        | 7.70  | 3.15  | 4.55   | 2.45  | 3.82E-02 |
| ADGRA3       | 11.82 | 7.30  | 4.52   | 1.62  | 3.82E-02 |
| LOC102724340 | 12.48 | 3.15  | 9.33   | 3.96  | 3.82E-02 |
| LOC105374768 | 10.34 | 2.61  | 7.73   | 3.97  | 3.83E-02 |
| LOC105375167 | 8.76  | 17.21 | -8.45  | 0.51  | 3.84E-02 |
| SEMA6A.AS2   | 5.51  | 1.43  | 4.08   | 3.86  | 3.84E-02 |
| RBM39        | 12.44 | 7.79  | 4.65   | 1.60  | 3.84E-02 |
| TRMT11       | 14.04 | 5.00  | 9.04   | 2.81  | 3.85E-02 |
| LOC105377400 | 8.14  | 2.68  | 5.46   | 3.04  | 3.85E-02 |
| RNF43        | 8.76  | 3.15  | 5.61   | 2.78  | 3.86E-02 |
| FGD4         | 6.97  | 10.67 | -3.71  | 0.65  | 3.87E-02 |
| GDF15        | 5.70  | 2.12  | 3.57   | 2.68  | 3.87E-02 |
| ANKRD13B     | 3.76  | 1.73  | 2.03   | 2.17  | 3.87E-02 |
| LOC105375861 | 10.87 | 4.48  | 6.39   | 2.43  | 3.87E-02 |
| GSAP         | 10.29 | 22.60 | -12.31 | 0.46  | 3.87E-02 |
| LOC105373225 | 10.78 | 4.67  | 6.10   | 2.31  | 3.87E-02 |
| PIK3C2G      | 12.24 | 7.69  | 4.55   | 1.59  | 3.87E-02 |
| STX12        | 14.53 | 6.55  | 7.97   | 2.22  | 3.88E-02 |
| SUSD4        | 6.75  | 10.54 | -3.79  | 0.64  | 3.88E-02 |
| LOC105375107 | 6.65  | 1.75  | 4.90   | 3.80  | 3.88E-02 |
| ACSM4        | 4.89  | 1.57  | 3.32   | 3.11  | 3.88E-02 |
| CTAGE10P     | 12.43 | 4.41  | 8.02   | 2.82  | 3.88E-02 |
| PRDM10       | 12.54 | 5.05  | 7.49   | 2.48  | 3.89E-02 |
| USH2A.AS1    | 27.65 | 7.84  | 19.82  | 3.53  | 3.89E-02 |
| CNKSR3       | 8.67  | 5.21  | 3.46   | 1.66  | 3.89E-02 |
| LOC105379464 | 1.54  | 0.00  | 1.54   | 1.54  | 3.90E-02 |

|              |       |       |        |       |          |
|--------------|-------|-------|--------|-------|----------|
| LOC101929976 | 16.29 | 3.38  | 12.91  | 4.82  | 3.90E-02 |
| MHENCN       | 7.36  | 0.55  | 6.81   | 13.29 | 3.90E-02 |
| MR1          | 6.06  | 9.63  | -3.57  | 0.63  | 3.91E-02 |
| LOC100130701 | 13.74 | 4.82  | 8.92   | 2.85  | 3.91E-02 |
| EEF2K        | 0.15  | 0.00  | 0.15   | 0.15  | 3.92E-02 |
| CDH15        | 4.49  | 1.32  | 3.17   | 3.40  | 3.92E-02 |
| LOC105370033 | 5.52  | 1.66  | 3.86   | 3.33  | 3.92E-02 |
| LOC101929388 | 22.99 | 2.77  | 20.22  | 8.30  | 3.92E-02 |
| GUK1         | 11.75 | 3.16  | 8.59   | 3.72  | 3.92E-02 |
| LOC105372383 | 5.12  | 2.49  | 2.62   | 2.05  | 3.93E-02 |
| FABP1        | 10.66 | 28.60 | -17.94 | 0.37  | 3.93E-02 |
| LINC00963    | 4.79  | 1.48  | 3.31   | 3.23  | 3.93E-02 |
| TRPS1        | 11.20 | 4.73  | 6.47   | 2.37  | 3.93E-02 |
| LOC105378890 | 4.53  | 10.04 | -5.52  | 0.45  | 3.93E-02 |
| TYK2         | 10.53 | 4.00  | 6.53   | 2.63  | 3.93E-02 |
| LOC107985635 | 1.80  | 9.16  | -7.36  | 0.20  | 3.94E-02 |
| MIR9985      | 8.59  | 0.00  | 8.59   | 8.59  | 3.94E-02 |
| TOMM22       | 2.98  | 1.25  | 1.73   | 2.38  | 3.95E-02 |
| LINC01807    | 17.36 | 5.94  | 11.42  | 2.92  | 3.95E-02 |
| LOC105378849 | 7.40  | 1.15  | 6.25   | 6.42  | 3.95E-02 |
| SAMSN1.AS1   | 13.09 | 2.26  | 10.83  | 5.78  | 3.96E-02 |
| TRAV10       | 16.50 | 1.12  | 15.37  | 14.72 | 3.97E-02 |
| LOC107987158 | 2.94  | 8.90  | -5.95  | 0.33  | 3.98E-02 |
| NICN1        | 10.67 | 1.23  | 9.44   | 8.70  | 3.98E-02 |
| LHX9         | 11.59 | 5.39  | 6.20   | 2.15  | 3.98E-02 |
| GGA2         | 9.10  | 5.46  | 3.64   | 1.67  | 3.98E-02 |
| LOC105373311 | 2.42  | 0.52  | 1.90   | 4.63  | 3.99E-02 |
| LOC112268140 | 15.39 | 1.70  | 13.69  | 9.07  | 3.99E-02 |
| LOC105378426 | 6.61  | 14.20 | -7.59  | 0.47  | 3.99E-02 |
| TMC2         | 5.64  | 16.74 | -11.09 | 0.34  | 4.00E-02 |
| GSTM5        | 13.82 | 4.87  | 8.95   | 2.84  | 4.00E-02 |
| SPRR3        | 9.63  | 5.32  | 4.30   | 1.81  | 4.00E-02 |
| HGH1         | 1.10  | 4.11  | -3.01  | 0.27  | 4.00E-02 |
| LOC107984525 | 7.94  | 11.22 | -3.28  | 0.71  | 4.00E-02 |
| FAM8A1       | 7.26  | 4.26  | 3.00   | 1.70  | 4.00E-02 |
| STAG3L4      | 12.54 | 2.97  | 9.57   | 4.22  | 4.00E-02 |
| UAP1         | 18.57 | 5.30  | 13.27  | 3.50  | 4.00E-02 |
| LOC105371240 | 11.52 | 6.29  | 5.23   | 1.83  | 4.00E-02 |
| TRMT2A       | 3.82  | 1.18  | 2.65   | 3.25  | 4.03E-02 |
| LOC105370902 | 23.25 | 5.69  | 17.56  | 4.09  | 4.03E-02 |
| MTHFD1L      | 9.84  | 5.81  | 4.03   | 1.69  | 4.04E-02 |
| FLT3         | 15.66 | 8.56  | 7.10   | 1.83  | 4.05E-02 |
| CSRP1        | 7.37  | 2.78  | 4.59   | 2.65  | 4.06E-02 |
| ANKRD30B     | 16.00 | 25.51 | -9.50  | 0.63  | 4.06E-02 |
| LOC102723846 | 13.45 | 3.85  | 9.60   | 3.49  | 4.06E-02 |
| CNTN2        | 5.86  | 3.30  | 2.56   | 1.77  | 4.07E-02 |
| C5orf58      | 15.58 | 5.11  | 10.47  | 3.05  | 4.07E-02 |

|              |       |       |        |       |          |
|--------------|-------|-------|--------|-------|----------|
| PTMA         | 9.20  | 2.19  | 7.01   | 4.20  | 4.07E-02 |
| TRGV3        | 12.91 | 3.23  | 9.68   | 4.00  | 4.08E-02 |
| SERPINB5     | 12.64 | 2.01  | 10.63  | 6.28  | 4.08E-02 |
| BAG2         | 5.93  | 2.78  | 3.15   | 2.13  | 4.08E-02 |
| POLB         | 13.25 | 5.35  | 7.90   | 2.48  | 4.08E-02 |
| TAB2         | 13.76 | 6.46  | 7.29   | 2.13  | 4.09E-02 |
| WLS          | 14.00 | 5.64  | 8.36   | 2.48  | 4.09E-02 |
| TNPO2        | 8.31  | 3.52  | 4.79   | 2.36  | 4.09E-02 |
| LOC105370911 | 10.12 | 2.00  | 8.12   | 5.05  | 4.10E-02 |
| LOC100270746 | 10.20 | 0.41  | 9.79   | 24.97 | 4.11E-02 |
| DNLZ         | 1.00  | 6.62  | -5.62  | 0.15  | 4.11E-02 |
| LOC105372878 | 13.03 | 0.52  | 12.51  | 24.86 | 4.12E-02 |
| PRAMEF9      | 0.52  | 0.00  | 0.52   | 0.52  | 4.13E-02 |
| INKA2.AS1    | 4.01  | 0.00  | 4.01   | 4.01  | 4.13E-02 |
| AGMO         | 14.17 | 6.71  | 7.46   | 2.11  | 4.14E-02 |
| RPL19        | 12.95 | 3.49  | 9.46   | 3.71  | 4.14E-02 |
| LOC107984778 | 3.18  | 14.96 | -11.79 | 0.21  | 4.14E-02 |
| LINC01543    | 2.68  | 26.77 | -24.09 | 0.10  | 4.14E-02 |
| LOC105378858 | 7.85  | 2.72  | 5.13   | 2.89  | 4.15E-02 |
| MELK         | 15.10 | 10.43 | 4.67   | 1.45  | 4.15E-02 |
| SDHC         | 9.17  | 5.92  | 3.25   | 1.55  | 4.15E-02 |
| MRLN         | 22.39 | 2.52  | 19.86  | 8.87  | 4.16E-02 |
| CCNA1        | 7.18  | 19.25 | -12.07 | 0.37  | 4.16E-02 |
| SCPEP1       | 7.20  | 3.62  | 3.58   | 1.99  | 4.16E-02 |
| IFNAR2       | 6.35  | 3.19  | 3.16   | 1.99  | 4.16E-02 |
| LOC102723529 | 7.00  | 16.41 | -9.41  | 0.43  | 4.17E-02 |
| LOC101927727 | 5.73  | 14.66 | -8.93  | 0.39  | 4.17E-02 |
| PTX4         | 10.75 | 1.58  | 9.17   | 6.80  | 4.17E-02 |
| PFDN2        | 13.33 | 3.48  | 9.85   | 3.83  | 4.17E-02 |
| LOC105373467 | 7.70  | 0.74  | 6.96   | 10.38 | 4.18E-02 |
| EVADR        | 3.61  | 0.29  | 3.32   | 12.64 | 4.18E-02 |
| LOC107985173 | 5.56  | 1.69  | 3.87   | 3.29  | 4.19E-02 |
| LOC105374654 | 19.60 | 1.74  | 17.86  | 11.26 | 4.19E-02 |
| LOC105370861 | 7.40  | 0.22  | 7.18   | 32.97 | 4.19E-02 |
| GOLGA7       | 7.01  | 2.01  | 5.00   | 3.49  | 4.19E-02 |
| LOC112268436 | 7.89  | 3.89  | 4.01   | 2.03  | 4.19E-02 |
| LOC645177    | 19.51 | 7.69  | 11.82  | 2.54  | 4.21E-02 |
| LHX3         | 3.24  | 1.80  | 1.44   | 1.80  | 4.21E-02 |
| WDFY3.AS2    | 8.91  | 3.86  | 5.05   | 2.31  | 4.21E-02 |
| LOC105372922 | 27.24 | 4.34  | 22.90  | 6.28  | 4.21E-02 |
| TFAP2B       | 11.27 | 6.37  | 4.90   | 1.77  | 4.22E-02 |
| GPATCH3      | 11.57 | 2.03  | 9.54   | 5.69  | 4.22E-02 |
| FOXC2        | 8.90  | 1.47  | 7.43   | 6.05  | 4.22E-02 |
| MPP3         | 7.44  | 2.91  | 4.53   | 2.56  | 4.22E-02 |
| SCOC.AS1     | 24.88 | 6.97  | 17.91  | 3.57  | 4.23E-02 |
| LOC107986094 | 10.97 | 2.94  | 8.03   | 3.73  | 4.23E-02 |
| SEPTIN3      | 3.31  | 1.75  | 1.55   | 1.88  | 4.23E-02 |

|              |       |       |        |       |          |
|--------------|-------|-------|--------|-------|----------|
| RCAN1        | 3.85  | 9.82  | -5.97  | 0.39  | 4.24E-02 |
| HGC6.3       | 5.27  | 0.83  | 4.44   | 6.31  | 4.24E-02 |
| LOC105375553 | 5.26  | 15.13 | -9.86  | 0.35  | 4.25E-02 |
| LOC102723763 | 4.53  | 9.97  | -5.45  | 0.45  | 4.25E-02 |
| LOC105374123 | 15.19 | 33.90 | -18.71 | 0.45  | 4.25E-02 |
| LINC02002    | 22.67 | 8.09  | 14.58  | 2.80  | 4.25E-02 |
| IFI44L       | 10.80 | 6.30  | 4.50   | 1.71  | 4.27E-02 |
| LOC105378095 | 12.07 | 4.29  | 7.77   | 2.81  | 4.27E-02 |
| LMBR1        | 7.53  | 4.68  | 2.85   | 1.61  | 4.27E-02 |
| SEMA6C       | 10.78 | 3.20  | 7.58   | 3.37  | 4.28E-02 |
| CGB8         | 10.29 | 2.75  | 7.55   | 3.75  | 4.28E-02 |
| LOC105378605 | 7.21  | 3.42  | 3.79   | 2.11  | 4.28E-02 |
| GRIK1.AS1    | 7.44  | 15.72 | -8.28  | 0.47  | 4.29E-02 |
| NUDT18       | 3.08  | 0.70  | 2.38   | 4.39  | 4.29E-02 |
| LOC105371983 | 11.34 | 0.62  | 10.72  | 18.18 | 4.29E-02 |
| SLC5A9       | 6.90  | 3.26  | 3.64   | 2.11  | 4.29E-02 |
| KRTAP4.3     | 7.73  | 2.35  | 5.38   | 3.29  | 4.30E-02 |
| SPATA45      | 26.64 | 1.67  | 24.97  | 15.97 | 4.30E-02 |
| ABCC13       | 13.39 | 5.68  | 7.71   | 2.36  | 4.30E-02 |
| LOC105372172 | 20.19 | 5.48  | 14.71  | 3.69  | 4.30E-02 |
| LOC105370282 | 20.23 | 4.81  | 15.42  | 4.21  | 4.31E-02 |
| LINC02200    | 10.89 | 2.08  | 8.81   | 5.23  | 4.31E-02 |
| LINC01069    | 12.94 | 4.53  | 8.40   | 2.85  | 4.32E-02 |
| GLUD1P2      | 4.68  | 17.94 | -13.26 | 0.26  | 4.32E-02 |
| LOC105376137 | 6.91  | 2.36  | 4.55   | 2.93  | 4.32E-02 |
| FUT2         | 8.55  | 3.66  | 4.89   | 2.34  | 4.33E-02 |
| LOC105376127 | 34.45 | 3.69  | 30.76  | 9.35  | 4.33E-02 |
| LOC100507516 | 6.24  | 3.20  | 3.04   | 1.95  | 4.33E-02 |
| LOC105373691 | 25.46 | 1.05  | 24.41  | 24.22 | 4.33E-02 |
| OR8B3        | 11.72 | 6.16  | 5.56   | 1.90  | 4.33E-02 |
| LOC105369565 | 2.61  | 15.27 | -12.66 | 0.17  | 4.33E-02 |
| SNORD136     | 13.67 | 6.56  | 7.11   | 2.08  | 4.34E-02 |
| LOC107986968 | 32.32 | 10.44 | 21.88  | 3.10  | 4.34E-02 |
| PIK3R1       | 6.50  | 10.31 | -3.81  | 0.63  | 4.35E-02 |
| OAZ1         | 4.18  | 1.71  | 2.47   | 2.45  | 4.35E-02 |
| LOC105379283 | 8.90  | 0.94  | 7.96   | 9.50  | 4.35E-02 |
| ZPLD1        | 16.03 | 8.24  | 7.79   | 1.95  | 4.36E-02 |
| SNORD115.5   | 15.61 | 1.83  | 13.78  | 8.53  | 4.36E-02 |
| LINC02313    | 4.18  | 0.00  | 4.18   | 4.18  | 4.36E-02 |
| PATE1        | 16.76 | 4.78  | 11.98  | 3.51  | 4.37E-02 |
| GKAP1        | 24.01 | 9.65  | 14.36  | 2.49  | 4.37E-02 |
| LOC107985792 | 4.12  | 13.28 | -9.15  | 0.31  | 4.37E-02 |
| LOC105373282 | 2.64  | 15.31 | -12.67 | 0.17  | 4.38E-02 |
| LOC102723331 | 10.47 | 6.05  | 4.42   | 1.73  | 4.39E-02 |
| IL15         | 13.72 | 4.54  | 9.18   | 3.02  | 4.40E-02 |
| LOC105376589 | 11.49 | 3.69  | 7.80   | 3.11  | 4.41E-02 |
| RGS9BP       | 4.88  | 0.80  | 4.08   | 6.07  | 4.41E-02 |

|              |       |       |        |       |          |
|--------------|-------|-------|--------|-------|----------|
| CHI3L1       | 4.02  | 11.97 | -7.95  | 0.34  | 4.42E-02 |
| LOC105376257 | 5.91  | 10.25 | -4.34  | 0.58  | 4.43E-02 |
| GTF2F2       | 11.40 | 4.60  | 6.81   | 2.48  | 4.43E-02 |
| WTAP         | 6.09  | 11.72 | -5.63  | 0.52  | 4.43E-02 |
| FBNP1        | 6.94  | 13.13 | -6.20  | 0.53  | 4.43E-02 |
| LOC105375323 | 15.85 | 4.42  | 11.43  | 3.58  | 4.43E-02 |
| ARHGEF3.AS1  | 12.65 | 1.49  | 11.16  | 8.50  | 4.43E-02 |
| EML5         | 5.07  | 7.69  | -2.63  | 0.66  | 4.44E-02 |
| CDS2         | 6.55  | 3.15  | 3.41   | 2.08  | 4.44E-02 |
| LINC02692    | 6.63  | 0.00  | 6.63   | 6.63  | 4.44E-02 |
| PNMA2        | 8.00  | 2.08  | 5.91   | 3.84  | 4.44E-02 |
| CYP1B1       | 6.35  | 1.54  | 4.82   | 4.13  | 4.45E-02 |
| LOC112267958 | 2.22  | 0.58  | 1.64   | 3.85  | 4.45E-02 |
| ADCY10       | 5.82  | 10.93 | -5.11  | 0.53  | 4.45E-02 |
| LINC02064    | 18.36 | 2.23  | 16.13  | 8.24  | 4.46E-02 |
| KRTAP5.10    | 8.02  | 2.19  | 5.83   | 3.67  | 4.46E-02 |
| LOC107987107 | 2.42  | 26.98 | -24.56 | 0.09  | 4.47E-02 |
| COL9A3       | 13.05 | 4.58  | 8.47   | 2.85  | 4.47E-02 |
| LINC01883    | 12.34 | 2.87  | 9.47   | 4.29  | 4.47E-02 |
| ADRM1        | 2.46  | 7.84  | -5.38  | 0.31  | 4.48E-02 |
| LOC105371272 | 3.22  | 0.38  | 2.84   | 8.56  | 4.49E-02 |
| LOC101928266 | 6.67  | 3.33  | 3.34   | 2.01  | 4.49E-02 |
| SNORA58B     | 11.15 | 0.00  | 11.15  | 11.15 | 4.49E-02 |
| LOC112268078 | 14.70 | 0.73  | 13.97  | 20.25 | 4.49E-02 |
| LOC105372813 | 8.79  | 0.41  | 8.37   | 21.30 | 4.49E-02 |
| WDR5         | 2.97  | 13.67 | -10.71 | 0.22  | 4.49E-02 |
| HAGLR        | 5.49  | 1.99  | 3.51   | 2.77  | 4.49E-02 |
| OR5H14       | 14.18 | 8.20  | 5.99   | 1.73  | 4.50E-02 |
| C19orf44     | 8.01  | 4.45  | 3.55   | 1.80  | 4.50E-02 |
| LOC112268221 | 6.34  | 2.66  | 3.67   | 2.38  | 4.51E-02 |
| TOP2A        | 7.00  | 14.94 | -7.94  | 0.47  | 4.51E-02 |
| NEIL2_1      | 1.09  | 0.00  | 1.09   | 1.09  | 4.51E-02 |
| GID8         | 7.61  | 2.98  | 4.63   | 2.55  | 4.51E-02 |
| MRC2         | 7.04  | 4.16  | 2.88   | 1.69  | 4.52E-02 |
| KCND3.IT1    | 11.75 | 1.53  | 10.22  | 7.67  | 4.52E-02 |
| MEIS3P1      | 4.79  | 19.04 | -14.26 | 0.25  | 4.52E-02 |
| LCE5A        | 9.71  | 0.45  | 9.26   | 21.73 | 4.53E-02 |
| KLHDC10      | 6.26  | 12.78 | -6.52  | 0.49  | 4.53E-02 |
| CCDC141      | 7.43  | 9.28  | -1.85  | 0.80  | 4.54E-02 |
| LOC107986896 | 15.92 | 2.73  | 13.18  | 5.82  | 4.54E-02 |
| LOC107984872 | 3.68  | 0.98  | 2.70   | 3.77  | 4.54E-02 |
| SNORD18B     | 12.72 | 6.86  | 5.86   | 1.85  | 4.54E-02 |
| LINC01341    | 4.17  | 0.34  | 3.82   | 12.17 | 4.54E-02 |
| TPST1        | 7.07  | 3.22  | 3.85   | 2.19  | 4.55E-02 |
| ACTR1B       | 4.27  | 0.76  | 3.51   | 5.62  | 4.55E-02 |
| LOC105370604 | 8.19  | 22.61 | -14.42 | 0.36  | 4.56E-02 |
| PDE4B        | 20.23 | 8.43  | 11.80  | 2.40  | 4.57E-02 |

|              |       |       |        |       |          |
|--------------|-------|-------|--------|-------|----------|
| ZBTB42       | 4.22  | 1.51  | 2.71   | 2.79  | 4.57E-02 |
| LOC112267966 | 15.61 | 4.78  | 10.84  | 3.27  | 4.57E-02 |
| LOC105374846 | 10.49 | 3.05  | 7.43   | 3.43  | 4.57E-02 |
| FBXL14       | 4.70  | 8.58  | -3.88  | 0.55  | 4.58E-02 |
| LOC105372432 | 1.17  | 0.00  | 1.17   | 1.17  | 4.58E-02 |
| LOC105377659 | 11.09 | 1.70  | 9.39   | 6.51  | 4.59E-02 |
| LOC105369457 | 9.31  | 0.56  | 8.75   | 16.69 | 4.59E-02 |
| LINC02742    | 10.84 | 4.62  | 6.22   | 2.35  | 4.59E-02 |
| LOC107986930 | 15.00 | 5.76  | 9.24   | 2.60  | 4.59E-02 |
| LOC105376568 | 8.58  | 2.20  | 6.38   | 3.90  | 4.60E-02 |
| CCM2         | 6.23  | 2.66  | 3.57   | 2.34  | 4.60E-02 |
| PKMYT1       | 2.77  | 0.48  | 2.29   | 5.74  | 4.61E-02 |
| LOC101929322 | 13.42 | 7.65  | 5.77   | 1.75  | 4.61E-02 |
| LINC01358    | 6.03  | 2.24  | 3.79   | 2.69  | 4.61E-02 |
| BCAR3        | 12.72 | 2.71  | 10.01  | 4.70  | 4.61E-02 |
| OR10AD1      | 9.88  | 3.36  | 6.52   | 2.94  | 4.61E-02 |
| MIR6127      | 11.98 | 0.00  | 11.98  | 11.98 | 4.62E-02 |
| ATP13A2      | 5.75  | 2.11  | 3.64   | 2.72  | 4.62E-02 |
| MGAT5        | 11.69 | 5.87  | 5.82   | 1.99  | 4.63E-02 |
| LOC105371010 | 5.58  | 2.31  | 3.28   | 2.42  | 4.63E-02 |
| CAGE1        | 9.08  | 2.90  | 6.18   | 3.13  | 4.63E-02 |
| CTDSPL2      | 18.24 | 5.60  | 12.63  | 3.25  | 4.64E-02 |
| POU4F2       | 8.87  | 2.44  | 6.43   | 3.64  | 4.64E-02 |
| LAMC2        | 11.22 | 3.98  | 7.24   | 2.82  | 4.64E-02 |
| LUADT1       | 28.30 | 4.31  | 23.99  | 6.57  | 4.64E-02 |
| TRV.AAC1.3   | 82.32 | 5.02  | 77.29  | 16.39 | 4.65E-02 |
| XKR6         | 1.22  | 0.28  | 0.94   | 4.41  | 4.65E-02 |
| CARD9        | 4.12  | 1.64  | 2.48   | 2.52  | 4.66E-02 |
| PSPC1        | 10.12 | 4.17  | 5.94   | 2.42  | 4.66E-02 |
| KLF9         | 10.36 | 3.30  | 7.06   | 3.14  | 4.67E-02 |
| LOC105370030 | 4.92  | 12.48 | -7.56  | 0.39  | 4.67E-02 |
| LOC107985217 | 4.36  | 12.19 | -7.83  | 0.36  | 4.67E-02 |
| LOC105378127 | 23.57 | 3.47  | 20.10  | 6.79  | 4.67E-02 |
| LOC107987037 | 16.02 | 2.59  | 13.43  | 6.19  | 4.67E-02 |
| LOC105379535 | 0.44  | 0.00  | 0.44   | 0.44  | 4.68E-02 |
| WFS1         | 4.12  | 16.00 | -11.88 | 0.26  | 4.68E-02 |
| TRBV7.5_1    | 3.49  | 0.87  | 2.62   | 4.02  | 4.68E-02 |
| LOC105378963 | 13.46 | 6.15  | 7.31   | 2.19  | 4.68E-02 |
| LOC105369421 | 5.96  | 2.99  | 2.96   | 1.99  | 4.70E-02 |
| LOC105372411 | 11.59 | 2.36  | 9.23   | 4.91  | 4.70E-02 |
| MAGEH1       | 7.56  | 0.84  | 6.72   | 8.99  | 4.71E-02 |
| LOC101927374 | 13.41 | 3.38  | 10.03  | 3.97  | 4.71E-02 |
| FLJ20712     | 8.30  | 1.01  | 7.29   | 8.23  | 4.71E-02 |
| XRCC1        | 10.44 | 4.19  | 6.25   | 2.49  | 4.71E-02 |
| LOC105378269 | 4.94  | 0.00  | 4.94   | 4.94  | 4.71E-02 |
| ZNRF3        | 7.77  | 3.95  | 3.82   | 1.97  | 4.71E-02 |
| KRTAP13.1    | 9.78  | 3.42  | 6.36   | 2.86  | 4.71E-02 |

|              |       |       |        |       |          |
|--------------|-------|-------|--------|-------|----------|
| SNORA2B      | 24.35 | 1.10  | 23.25  | 22.23 | 4.72E-02 |
| EPC1         | 10.38 | 7.28  | 3.10   | 1.43  | 4.72E-02 |
| LINC02050    | 15.92 | 2.90  | 13.02  | 5.49  | 4.73E-02 |
| CERK         | 6.46  | 2.53  | 3.93   | 2.55  | 4.73E-02 |
| LOC105369515 | 3.17  | 10.26 | -7.10  | 0.31  | 4.74E-02 |
| ZC3H13       | 12.53 | 8.40  | 4.13   | 1.49  | 4.74E-02 |
| NR1I2        | 5.07  | 8.75  | -3.68  | 0.58  | 4.75E-02 |
| KDM7A.DT     | 9.23  | 2.19  | 7.04   | 4.22  | 4.76E-02 |
| ITGB4        | 3.92  | 10.16 | -6.24  | 0.39  | 4.77E-02 |
| AURKA        | 12.54 | 6.71  | 5.83   | 1.87  | 4.77E-02 |
| LOC107987087 | 24.16 | 3.39  | 20.77  | 7.13  | 4.77E-02 |
| CH507.9B2.8  | 0.31  | 0.00  | 0.31   | 0.31  | 4.77E-02 |
| SOAT2        | 13.05 | 4.43  | 8.62   | 2.95  | 4.78E-02 |
| MRPL45_1     | 1.10  | 0.12  | 0.98   | 8.92  | 4.78E-02 |
| IFI35        | 19.34 | 3.52  | 15.82  | 5.50  | 4.79E-02 |
| LOC105378766 | 6.20  | 24.40 | -18.20 | 0.25  | 4.79E-02 |
| RYR3.DT      | 16.43 | 2.23  | 14.20  | 7.37  | 4.80E-02 |
| DGKB         | 11.56 | 7.10  | 4.47   | 1.63  | 4.80E-02 |
| AKR1C8P      | 6.37  | 2.61  | 3.76   | 2.44  | 4.80E-02 |
| IFNW1        | 7.29  | 0.76  | 6.54   | 9.64  | 4.80E-02 |
| PRSS58_1     | 2.59  | 0.00  | 2.59   | 2.59  | 4.80E-02 |
| LOC100505774 | 9.99  | 3.42  | 6.56   | 2.92  | 4.81E-02 |
| APOBEC1      | 8.30  | 2.19  | 6.12   | 3.80  | 4.81E-02 |
| TDP1         | 14.09 | 7.91  | 6.17   | 1.78  | 4.81E-02 |
| LOC105371132 | 0.68  | 0.09  | 0.59   | 7.86  | 4.81E-02 |
| LOC101927073 | 11.94 | 5.78  | 6.17   | 2.07  | 4.81E-02 |
| LOC105377994 | 20.86 | 9.58  | 11.28  | 2.18  | 4.82E-02 |
| PCGF3        | 9.24  | 4.31  | 4.93   | 2.14  | 4.82E-02 |
| SPRY4        | 2.87  | 6.48  | -3.61  | 0.44  | 4.82E-02 |
| ANKRD26      | 9.15  | 6.69  | 2.46   | 1.37  | 4.83E-02 |
| LOC107984284 | 6.17  | 16.02 | -9.85  | 0.38  | 4.83E-02 |
| D2HGDH       | 6.00  | 2.31  | 3.68   | 2.59  | 4.83E-02 |
| LOC105371608 | 1.89  | 11.25 | -9.36  | 0.17  | 4.84E-02 |
| FAM83A       | 5.74  | 4.05  | 1.70   | 1.42  | 4.84E-02 |
| ANKRD34C.AS1 | 4.05  | 21.77 | -17.72 | 0.19  | 4.84E-02 |
| LOC105375955 | 7.00  | 0.35  | 6.65   | 20.17 | 4.85E-02 |
| LOC105371679 | 11.42 | 3.70  | 7.73   | 3.09  | 4.85E-02 |
| LINC01771    | 11.24 | 0.00  | 11.24  | 11.24 | 4.86E-02 |
| LOC105370262 | 10.75 | 3.50  | 7.25   | 3.07  | 4.87E-02 |
| FCGR2C       | 18.63 | 6.32  | 12.31  | 2.95  | 4.88E-02 |
| MRM1         | 0.75  | 0.05  | 0.70   | 15.88 | 4.88E-02 |
| TRIM68       | 2.64  | 6.41  | -3.76  | 0.41  | 4.88E-02 |
| LOC107984822 | 21.67 | 4.48  | 17.19  | 4.84  | 4.89E-02 |
| NMD3         | 14.58 | 6.44  | 8.14   | 2.26  | 4.89E-02 |
| LINC02086    | 12.49 | 5.86  | 6.63   | 2.13  | 4.89E-02 |
| RBM47        | 8.49  | 4.62  | 3.88   | 1.84  | 4.89E-02 |
| MYOM3.AS1    | 6.12  | 1.27  | 4.84   | 4.80  | 4.89E-02 |

|              |       |       |        |       |          |
|--------------|-------|-------|--------|-------|----------|
| CEP68        | 6.29  | 3.41  | 2.88   | 1.84  | 4.90E-02 |
| BARX1.DT     | 4.90  | 0.77  | 4.14   | 6.39  | 4.90E-02 |
| SH2D7        | 3.09  | 7.68  | -4.59  | 0.40  | 4.90E-02 |
| PSLNR        | 8.50  | 26.99 | -18.49 | 0.32  | 4.90E-02 |
| LOC107984316 | 3.94  | 8.43  | -4.49  | 0.47  | 4.91E-02 |
| LOC105374362 | 5.17  | 9.75  | -4.58  | 0.53  | 4.92E-02 |
| LOC105375684 | 2.57  | 21.31 | -18.73 | 0.12  | 4.92E-02 |
| MIR6859.1    | 5.79  | 0.00  | 5.79   | 5.79  | 4.92E-02 |
| VN1R1        | 8.69  | 2.36  | 6.33   | 3.68  | 4.92E-02 |
| LOC105379513 | 1.25  | 0.30  | 0.95   | 4.11  | 4.93E-02 |
| LOC107986970 | 7.20  | 4.21  | 2.99   | 1.71  | 4.93E-02 |
| LOC107986334 | 7.19  | 3.58  | 3.62   | 2.01  | 4.93E-02 |
| PRRC2C       | 13.08 | 7.73  | 5.34   | 1.69  | 4.93E-02 |
| LOC105376991 | 8.30  | 1.57  | 6.73   | 5.28  | 4.94E-02 |
| LOC107986440 | 13.42 | 2.86  | 10.56  | 4.69  | 4.94E-02 |
| ENOSF1       | 6.15  | 3.26  | 2.89   | 1.89  | 4.94E-02 |
| AKAP1        | 3.75  | 7.19  | -3.44  | 0.52  | 4.95E-02 |
| VWA5B1       | 7.95  | 4.48  | 3.47   | 1.77  | 4.96E-02 |
| DPEP2        | 13.61 | 6.44  | 7.17   | 2.11  | 4.96E-02 |
| LOC101929560 | 3.29  | 18.85 | -15.56 | 0.17  | 4.96E-02 |
| LOC105377088 | 6.79  | 0.97  | 5.82   | 7.00  | 4.97E-02 |
| OR10Z1       | 9.01  | 3.46  | 5.54   | 2.60  | 4.97E-02 |
| LRFN4        | 2.65  | 6.28  | -3.63  | 0.42  | 4.97E-02 |
| GCC2.AS1     | 2.09  | 0.22  | 1.87   | 9.61  | 4.97E-02 |
| FITM2        | 9.01  | 1.76  | 7.25   | 5.12  | 4.98E-02 |
| SEC61A2      | 16.85 | 6.22  | 10.63  | 2.71  | 4.98E-02 |
| C16orf74     | 8.57  | 0.46  | 8.10   | 18.55 | 4.98E-02 |
| ENTPD2       | 5.39  | 1.70  | 3.69   | 3.17  | 4.98E-02 |
| LOC105374136 | 17.73 | 2.69  | 15.04  | 6.59  | 4.98E-02 |
| MAP3K9       | 7.44  | 3.08  | 4.35   | 2.41  | 4.99E-02 |
| SLC25A16     | 6.11  | 9.82  | -3.71  | 0.62  | 4.99E-02 |
| SLC22A23     | 9.84  | 4.23  | 5.61   | 2.33  | 4.99E-02 |
| LINC01683    | 9.38  | 28.11 | -18.73 | 0.33  | 4.99E-02 |
| LONRF3       | 5.43  | 2.80  | 2.63   | 1.94  | 4.99E-02 |
| LOC105378226 | 10.11 | 3.72  | 6.39   | 2.72  | 5.00E-02 |
| SLC37A3      | 16.08 | 6.96  | 9.12   | 2.31  | 5.00E-02 |
| EPM2A        | 10.36 | 5.85  | 4.50   | 1.77  | 5.00E-02 |
